# Supplementary material for: Virulent Bacteria as Inflammatory and Immune Co-Factor in Colon Carcinogenesis: Evidence From Two Monozygotic Patients and Validation in CRC Patient and Healthy Cohorts
Source: Front Cell Infect Microbiol. 2021 Nov 4;11:749750. doi: 10.3389/fcimb.2021.749750 (PMC8600479; doi:10.3389/fcimb.2021.749750)
Supplement: Supplementary file 1 [file Table_1.xlsx]

## Sheet: CCR1-WGS_VFDB-bowtie2_rev-29-01
VFNAME	Strain	name	totalReads	nNotZERO	nZERO	FR.003	FR.024	FR.025	FR.026	FR.027	FR.030	FR.039	FR.040	FR.051	FR.052	FR.053	FR.054	FR.060	FR.110	FR.113	FR.115	FR.116	FR.118	FR.121	FR.125	FR.129	FR.132	FR.139	FR.142	FR.152	FR.156	FR.161	FR.162	FR.166	FR.169	FR.170	FR.173	FR.187	FR.191	FR.192	FR.193	FR.194	FR.195	FR.196	FR.198	FR.001	FR.202	FR.208	FR.211
VFG037984(gi:384130051)_(ABK1_0091)_sialic_acid_synthase_[Capsule_(CVF775)]_[Acinetobacter_baumannii_1656-2]	Acinetobacter_baumannii_1656-2]	ABK1_0091	0	0	2	0	0	0	0	0	0	0	0	0	0	0	0	0	0	0	0	0	0	0	0	0	0	0	0	0	0	0	0	0	0	0	0	0	0	0	0	0	0	0	0	0	0	0	0
VFG037271(gi:384132652)_(barA)_barA_[Acinetobactin_(CVF768)]_[Acinetobacter_baumannii_1656-2]	Acinetobacter_baumannii_1656-2]	barA	0	0	2	0	0	0	0	0	0	0	0	0	0	0	0	0	0	0	0	0	0	0	0	0	0	0	0	0	0	0	0	0	0	0	0	0	0	0	0	0	0	0	0	0	0	0	0
VFG037849(gi:384130042)_(ABK1_0082)_Tyrosine-protein_kinase,_autophosphorylates_[Capsule_(CVF775)]_[Acinetobacter_baumannii_1656-2]	Acinetobacter_baumannii_1656-2]	ABK1_0082	0	0	2	0	0	0	0	0	0	0	0	0	0	0	0	0	0	0	0	0	0	0	0	0	0	0	0	0	0	0	0	0	0	0	0	0	0	0	0	0	0	0	0	0	0	0	0
VFG037999(gi:384130052)_(ABK1_0092)_putative_polysaccharide_biosynthesis_protein_[Capsule_(CVF775)]_[Acinetobacter_baumannii_1656-2]	Acinetobacter_baumannii_1656-2]	ABK1_0092	0	0	2	0	0	0	0	0	0	0	0	0	0	0	0	0	0	0	0	0	0	0	0	0	0	0	0	0	0	0	0	0	0	0	0	0	0	0	0	0	0	0	0	0	0	0	0
VFG037609(gi:384131235)_(csuD)_protein_CsuD_[Csu_pili_(CVF770)]_[Acinetobacter_baumannii_1656-2]	Acinetobacter_baumannii_1656-2]	csuD	0	0	2	0	0	0	0	0	0	0	0	0	0	0	0	0	0	0	0	0	0	0	0	0	0	0	0	0	0	0	0	0	0	0	0	0	0	0	0	0	0	0	0	0	0	0	0
VFG038029(gi:384130054)_(ABK1_0094)_hypothetical_protein_[Capsule_(CVF775)]_[Acinetobacter_baumannii_1656-2]	Acinetobacter_baumannii_1656-2]	ABK1_0094	0	0	2	0	0	0	0	0	0	0	0	0	0	0	0	0	0	0	0	0	0	0	0	0	0	0	0	0	0	0	0	0	0	0	0	0	0	0	0	0	0	0	0	0	0	0	0
VFG038074(gi:384130057)_(ABK1_0097)_transposase_[Capsule_(CVF775)]_[Acinetobacter_baumannii_1656-2]	Acinetobacter_baumannii_1656-2]	ABK1_0097	0	0	2	0	0	0	0	0	0	0	0	0	0	0	0	0	0	0	0	0	0	0	0	0	0	0	0	0	0	0	0	0	0	0	0	0	0	0	0	0	0	0	0	0	0	0	0
VFG037647(gi:384131285)_(pgaA)_hypothetical_protein_[PNAG_(Polysaccharide_poly-N-acetylglucosamine)_(CVF772)]_[Acinetobacter_baumannii_1656-2]	Acinetobacter_baumannii_1656-2]	pgaA	0	0	2	0	0	0	0	0	0	0	0	0	0	0	0	0	0	0	0	0	0	0	0	0	0	0	0	0	0	0	0	0	0	0	0	0	0	0	0	0	0	0	0	0	0	0	0
VFG038044(gi:384130055)_(ABK1_0095)_hypothetical_protein_[Capsule_(CVF775)]_[Acinetobacter_baumannii_1656-2]	Acinetobacter_baumannii_1656-2]	ABK1_0095	0	0	2	0	0	0	0	0	0	0	0	0	0	0	0	0	0	0	0	0	0	0	0	0	0	0	0	0	0	0	0	0	0	0	0	0	0	0	0	0	0	0	0	0	0	0	0
VFG037170(gi:384130035)_(plc)_phospholipase_C_[Phospholipase_C_(CVF766)]_[Acinetobacter_baumannii_1656-2]	Acinetobacter_baumannii_1656-2]	plc	0	0	2	0	0	0	0	0	0	0	0	0	0	0	0	0	0	0	0	0	0	0	0	0	0	0	0	0	0	0	0	0	0	0	0	0	0	0	0	0	0	0	0	0	0	0	0
VFG037834(gi:384132514)_(lpxD)_lpxD_[LPS_(CVF774)]_[Acinetobacter_baumannii_1656-2]	Acinetobacter_baumannii_1656-2]	lpxD	0	0	2	0	0	0	0	0	0	0	0	0	0	0	0	0	0	0	0	0	0	0	0	0	0	0	0	0	0	0	0	0	0	0	0	0	0	0	0	0	0	0	0	0	0	0	0
VFG037313(gi:384132657)_(entE)_entE_[Acinetobactin_(CVF768)]_[Acinetobacter_baumannii_1656-2]	Acinetobacter_baumannii_1656-2]	entE	0	0	2	0	0	0	0	0	0	0	0	0	0	0	0	0	0	0	0	0	0	0	0	0	0	0	0	0	0	0	0	0	0	0	0	0	0	0	0	0	0	0	0	0	0	0	0
VFG037425(gi:384132665)_(basB)_basB_[Acinetobactin_(CVF768)]_[Acinetobacter_baumannii_1656-2]	Acinetobacter_baumannii_1656-2]	basB	0	0	2	0	0	0	0	0	0	0	0	0	0	0	0	0	0	0	0	0	0	0	0	0	0	0	0	0	0	0	0	0	0	0	0	0	0	0	0	0	0	0	0	0	0	0	0
VFG037939(gi:384130048)_(ABK1_0088)_Putative_NeuA_[Capsule_(CVF775)]_[Acinetobacter_baumannii_1656-2]	Acinetobacter_baumannii_1656-2]	ABK1_0088	0	0	2	0	0	0	0	0	0	0	0	0	0	0	0	0	0	0	0	0	0	0	0	0	0	0	0	0	0	0	0	0	0	0	0	0	0	0	0	0	0	0	0	0	0	0	0
VFG037924(gi:384130047)_(ABK1_0087)_DegT/DnrJ/EryC1/StrS_aminotransferase_[Capsule_(CVF775)]_[Acinetobacter_baumannii_1656-2]	Acinetobacter_baumannii_1656-2]	ABK1_0087	0	0	2	0	0	0	0	0	0	0	0	0	0	0	0	0	0	0	0	0	0	0	0	0	0	0	0	0	0	0	0	0	0	0	0	0	0	0	0	0	0	0	0	0	0	0	0
VFG037789(gi:384132512)_(lpxA)_lpxA_[LPS_(CVF774)]_[Acinetobacter_baumannii_1656-2]	Acinetobacter_baumannii_1656-2]	lpxA	0	0	2	0	0	0	0	0	0	0	0	0	0	0	0	0	0	0	0	0	0	0	0	0	0	0	0	0	0	0	0	0	0	0	0	0	0	0	0	0	0	0	0	0	0	0	0
VFG038014(gi:384130053)_(ABK1_0093)_putative_polysaccharide_biosynthesis_protein_[Capsule_(CVF775)]_[Acinetobacter_baumannii_1656-2]	Acinetobacter_baumannii_1656-2]	ABK1_0093	0	0	2	0	0	0	0	0	0	0	0	0	0	0	0	0	0	0	0	0	0	0	0	0	0	0	0	0	0	0	0	0	0	0	0	0	0	0	0	0	0	0	0	0	0	0	0
VFG037909(gi:384130046)_(ABK1_0086)_Polysaccharide_biosynthesis_protein_CapD_[Capsule_(CVF775)]_[Acinetobacter_baumannii_1656-2]	Acinetobacter_baumannii_1656-2]	ABK1_0086	0	0	2	0	0	0	0	0	0	0	0	0	0	0	0	0	0	0	0	0	0	0	0	0	0	0	0	0	0	0	0	0	0	0	0	0	0	0	0	0	0	0	0	0	0	0	0
VFG037635(gi:384132954)_(bap)_hemolysin-type_calcium-binding_domain-containing_protein_[Biofilm-associated_protein_(CVF771)]_[Acinetobacter_baumannii_1656-2]	Acinetobacter_baumannii_1656-2]	bap	0	0	2	0	0	0	0	0	0	0	0	0	0	0	0	0	0	0	0	0	0	0	0	0	0	0	0	0	0	0	0	0	0	0	0	0	0	0	0	0	0	0	0	0	0	0	0
VFG037411(gi:384132664)_(bauD)_bauD_[Acinetobactin_(CVF768)]_[Acinetobacter_baumannii_1656-2]	Acinetobacter_baumannii_1656-2]	bauD	0	0	2	0	0	0	0	0	0	0	0	0	0	0	0	0	0	0	0	0	0	0	0	0	0	0	0	0	0	0	0	0	0	0	0	0	0	0	0	0	0	0	0	0	0	0	0
VFG038231(gi:384130705)_(bfmS)_Sensor_protein_[Two-component_system_(CVF778)]_[Acinetobacter_baumannii_1656-2]	Acinetobacter_baumannii_1656-2]	bfmS	0	0	2	0	0	0	0	0	0	0	0	0	0	0	0	0	0	0	0	0	0	0	0	0	0	0	0	0	0	0	0	0	0	0	0	0	0	0	0	0	0	0	0	0	0	0	0
VFG037804(gi:384132116)_(lpxB)_lpxB_[LPS_(CVF774)]_[Acinetobacter_baumannii_1656-2]	Acinetobacter_baumannii_1656-2]	lpxB	0	0	2	0	0	0	0	0	0	0	0	0	0	0	0	0	0	0	0	0	0	0	0	0	0	0	0	0	0	0	0	0	0	0	0	0	0	0	0	0	0	0	0	0	0	0	0
VFG037894(gi:384130045)_(ABK1_0085)_UDP-glucose/GDP-mannose_dehydrogenase_[Capsule_(CVF775)]_[Acinetobacter_baumannii_1656-2]	Acinetobacter_baumannii_1656-2]	ABK1_0085	0	0	2	0	0	0	0	0	0	0	0	0	0	0	0	0	0	0	0	0	0	0	0	0	0	0	0	0	0	0	0	0	0	0	0	0	0	0	0	0	0	0	0	0	0	0	0
VFG037243(gi:384132650)_(basH)_basH_[Acinetobactin_(CVF768)]_[Acinetobacter_baumannii_1656-2]	Acinetobacter_baumannii_1656-2]	basH	0	0	2	0	0	0	0	0	0	0	0	0	0	0	0	0	0	0	0	0	0	0	0	0	0	0	0	0	0	0	0	0	0	0	0	0	0	0	0	0	0	0	0	0	0	0	0
VFG038162(gi:384130064)_(ABK1_0104)_phosphomannomutase_[Capsule_(CVF775)]_[Acinetobacter_baumannii_1656-2]	Acinetobacter_baumannii_1656-2]	ABK1_0104	0	0	2	0	0	0	0	0	0	0	0	0	0	0	0	0	0	0	0	0	0	0	0	0	0	0	0	0	0	0	0	0	0	0	0	0	0	0	0	0	0	0	0	0	0	0	0
VFG037759(gi:384130433)_(lpxL)_htrB_[LPS_(CVF774)]_[Acinetobacter_baumannii_1656-2]	Acinetobacter_baumannii_1656-2]	lpxL	0	0	2	0	0	0	0	0	0	0	0	0	0	0	0	0	0	0	0	0	0	0	0	0	0	0	0	0	0	0	0	0	0	0	0	0	0	0	0	0	0	0	0	0	0	0	0
VFG038188(gi:384130102)_(abaI)_N-acylhomoserine_lactone_synthase,_autoinducer_synthesis_protein_[Quorum_sensing_(CVF777)]_[Acinetobacter_baumannii_1656-2]	Acinetobacter_baumannii_1656-2]	abaI	0	0	2	0	0	0	0	0	0	0	0	0	0	0	0	0	0	0	0	0	0	0	0	0	0	0	0	0	0	0	0	0	0	0	0	0	0	0	0	0	0	0	0	0	0	0	0
VFG037774(gi:384130432)_(lpsB)_glycosyltransferase_[LPS_(CVF774)]_[Acinetobacter_baumannii_1656-2]	Acinetobacter_baumannii_1656-2]	lpsB	0	0	2	0	0	0	0	0	0	0	0	0	0	0	0	0	0	0	0	0	0	0	0	0	0	0	0	0	0	0	0	0	0	0	0	0	0	0	0	0	0	0	0	0	0	0	0
VFG037355(gi:384132660)_(bauA)_bauA_[Acinetobactin_(CVF768)]_[Acinetobacter_baumannii_1656-2]	Acinetobacter_baumannii_1656-2]	bauA	0	0	2	0	0	0	0	0	0	0	0	0	0	0	0	0	0	0	0	0	0	0	0	0	0	0	0	0	0	0	0	0	0	0	0	0	0	0	0	0	0	0	0	0	0	0	0
VFG038153(gi:384130063)_(ABK1_0103)_galE_[Capsule_(CVF775)]_[Acinetobacter_baumannii_1656-2]	Acinetobacter_baumannii_1656-2]	ABK1_0103	0	0	2	0	0	0	0	0	0	0	0	0	0	0	0	0	0	0	0	0	0	0	0	0	0	0	0	0	0	0	0	0	0	0	0	0	0	0	0	0	0	0	0	0	0	0	0
VFG037467(gi:384130865)_(ABK1_0905)_transcriptional_regulator_[Heme_utilization__(CVF769)]_[Acinetobacter_baumannii_1656-2]	Acinetobacter_baumannii_1656-2]	ABK1_0905	0	0	2	0	0	0	0	0	0	0	0	0	0	0	0	0	0	0	0	0	0	0	0	0	0	0	0	0	0	0	0	0	0	0	0	0	0	0	0	0	0	0	0	0	0	0	0
VFG037557(gi:384131229)_(csuA/B)_protein_CsuA/B_[Csu_pili_(CVF770)]_[Acinetobacter_baumannii_1656-2]	Acinetobacter_baumannii_1656-2]	csuA/B	0	0	2	0	0	0	0	0	0	0	0	0	0	0	0	0	0	0	0	0	0	0	0	0	0	0	0	0	0	0	0	0	0	0	0	0	0	0	0	0	0	0	0	0	0	0	0
VFG037864(gi:384130043)_(ABK1_0083)_Low_molecular_weight_protein-tyrosine-phosphatase_[Capsule_(CVF775)]_[Acinetobacter_baumannii_1656-2]	Acinetobacter_baumannii_1656-2]	ABK1_0083	0	0	2	0	0	0	0	0	0	0	0	0	0	0	0	0	0	0	0	0	0	0	0	0	0	0	0	0	0	0	0	0	0	0	0	0	0	0	0	0	0	0	0	0	0	0	0
VFG037879(gi:384130044)_(ABK1_0084)_Polysaccharide_export_protein_[Capsule_(CVF775)]_[Acinetobacter_baumannii_1656-2]	Acinetobacter_baumannii_1656-2]	ABK1_0084	0	0	2	0	0	0	0	0	0	0	0	0	0	0	0	0	0	0	0	0	0	0	0	0	0	0	0	0	0	0	0	0	0	0	0	0	0	0	0	0	0	0	0	0	0	0	0
VFG037969(gi:384130050)_(ABK1_0090)_N-acetyltransferase_GCN5_[Capsule_(CVF775)]_[Acinetobacter_baumannii_1656-2]	Acinetobacter_baumannii_1656-2]	ABK1_0090	0	0	2	0	0	0	0	0	0	0	0	0	0	0	0	0	0	0	0	0	0	0	0	0	0	0	0	0	0	0	0	0	0	0	0	0	0	0	0	0	0	0	0	0	0	0	0
VFG037622(gi:384131236)_(csuE)_protein_CsuE_[Csu_pili_(CVF770)]_[Acinetobacter_baumannii_1656-2]	Acinetobacter_baumannii_1656-2]	csuE	0	0	2	0	0	0	0	0	0	0	0	0	0	0	0	0	0	0	0	0	0	0	0	0	0	0	0	0	0	0	0	0	0	0	0	0	0	0	0	0	0	0	0	0	0	0	0
VFG037954(gi:384130049)_(ABK1_0089)_polysaccharide_biosynthesis_protein_[Capsule_(CVF775)]_[Acinetobacter_baumannii_1656-2]	Acinetobacter_baumannii_1656-2]	ABK1_0089	0	0	2	0	0	0	0	0	0	0	0	0	0	0	0	0	0	0	0	0	0	0	0	0	0	0	0	0	0	0	0	0	0	0	0	0	0	0	0	0	0	0	0	0	0	0	0
VFG038130(gi:384130061)_(ABK1_0101)_Udg_[Capsule_(CVF775)]_[Acinetobacter_baumannii_1656-2]	Acinetobacter_baumannii_1656-2]	ABK1_0101	0	0	2	0	0	0	0	0	0	0	0	0	0	0	0	0	0	0	0	0	0	0	0	0	0	0	0	0	0	0	0	0	0	0	0	0	0	0	0	0	0	0	0	0	0	0	0
VFG037383(gi:384132662)_(bauE)_bauE_[Acinetobactin_(CVF768)]_[Acinetobacter_baumannii_1656-2]	Acinetobacter_baumannii_1656-2]	bauE	0	0	2	0	0	0	0	0	0	0	0	0	0	0	0	0	0	0	0	0	0	0	0	0	0	0	0	0	0	0	0	0	0	0	0	0	0	0	0	0	0	0	0	0	0	0	0
VFG038202(gi:384130104)_(abaR)_ER_transcriptional_regulator_[Quorum_sensing_(CVF777)]_[Acinetobacter_baumannii_1656-2]	Acinetobacter_baumannii_1656-2]	abaR	0	0	2	0	0	0	0	0	0	0	0	0	0	0	0	0	0	0	0	0	0	0	0	0	0	0	0	0	0	0	0	0	0	0	0	0	0	0	0	0	0	0	0	0	0	0	0
VFG037544(gi:384130866)_(ABK1_0906)_hypothetical_protein_[Heme_utilization__(CVF769)]_[Acinetobacter_baumannii_1656-2]	Acinetobacter_baumannii_1656-2]	ABK1_0906	0	0	2	0	0	0	0	0	0	0	0	0	0	0	0	0	0	0	0	0	0	0	0	0	0	0	0	0	0	0	0	0	0	0	0	0	0	0	0	0	0	0	0	0	0	0	0
VFG037596(gi:384131232)_(csuC)_protein_CsuC_[Csu_pili_(CVF770)]_[Acinetobacter_baumannii_1656-2]	Acinetobacter_baumannii_1656-2]	csuC	0	0	2	0	0	0	0	0	0	0	0	0	0	0	0	0	0	0	0	0	0	0	0	0	0	0	0	0	0	0	0	0	0	0	0	0	0	0	0	0	0	0	0	0	0	0	0
VFG037819(gi:384133539)_(lpxC)_lpxC_[LPS_(CVF774)]_[Acinetobacter_baumannii_1656-2]	Acinetobacter_baumannii_1656-2]	lpxC	0	0	2	0	0	0	0	0	0	0	0	0	0	0	0	0	0	0	0	0	0	0	0	0	0	0	0	0	0	0	0	0	0	0	0	0	0	0	0	0	0	0	0	0	0	0	0
VFG037570(gi:384131230)_(csuA)_protein_CsuA_[Csu_pili_(CVF770)]_[Acinetobacter_baumannii_1656-2]	Acinetobacter_baumannii_1656-2]	csuA	0	0	2	0	0	0	0	0	0	0	0	0	0	0	0	0	0	0	0	0	0	0	0	0	0	0	0	0	0	0	0	0	0	0	0	0	0	0	0	0	0	0	0	0	0	0	0
VFG038059(gi:384130056)_(ABK1_0096)_glycosyltransferase_[Capsule_(CVF775)]_[Acinetobacter_baumannii_1656-2]	Acinetobacter_baumannii_1656-2]	ABK1_0096	0	0	2	0	0	0	0	0	0	0	0	0	0	0	0	0	0	0	0	0	0	0	0	0	0	0	0	0	0	0	0	0	0	0	0	0	0	0	0	0	0	0	0	0	0	0	0
VFG038117(gi:384130060)_(ABK1_0100)_galU_[Capsule_(CVF775)]_[Acinetobacter_baumannii_1656-2]	Acinetobacter_baumannii_1656-2]	ABK1_0100	0	0	2	0	0	0	0	0	0	0	0	0	0	0	0	0	0	0	0	0	0	0	0	0	0	0	0	0	0	0	0	0	0	0	0	0	0	0	0	0	0	0	0	0	0	0	0
VFG038142(gi:384130062)_(ABK1_0102)_glucose-6-phosphate_isomerase_[Capsule_(CVF775)]_[Acinetobacter_baumannii_1656-2]	Acinetobacter_baumannii_1656-2]	ABK1_0102	0	0	2	0	0	0	0	0	0	0	0	0	0	0	0	0	0	0	0	0	0	0	0	0	0	0	0	0	0	0	0	0	0	0	0	0	0	0	0	0	0	0	0	0	0	0	0
VFG038246(gi:384130247)_(pbpG)_pbpG_[PbpG_(CVF779)]_[Acinetobacter_baumannii_1656-2]	Acinetobacter_baumannii_1656-2]	pbpG	0	0	2	0	0	0	0	0	0	0	0	0	0	0	0	0	0	0	0	0	0	0	0	0	0	0	0	0	0	0	0	0	0	0	0	0	0	0	0	0	0	0	0	0	0	0	0
VFG038103(gi:384130059)_(ABK1_0099)_WeeH_[Capsule_(CVF775)]_[Acinetobacter_baumannii_1656-2]	Acinetobacter_baumannii_1656-2]	ABK1_0099	0	0	2	0	0	0	0	0	0	0	0	0	0	0	0	0	0	0	0	0	0	0	0	0	0	0	0	0	0	0	0	0	0	0	0	0	0	0	0	0	0	0	0	0	0	0	0
VFG038089(gi:384130058)_(ABK1_0098)_glycosyltransferase_[Capsule_(CVF775)]_[Acinetobacter_baumannii_1656-2]	Acinetobacter_baumannii_1656-2]	ABK1_0098	0	0	2	0	0	0	0	0	0	0	0	0	0	0	0	0	0	0	0	0	0	0	0	0	0	0	0	0	0	0	0	0	0	0	0	0	0	0	0	0	0	0	0	0	0	0	0
VFG037895(gi:213155463)_(AB57_0094)_VI_polysaccharide_biosynthesis_protein_VipA/tviB_[Capsule_(CVF775)]_[Acinetobacter_baumannii_AB0057]	Acinetobacter_baumannii_AB0057]	AB57_0094	2	0	2	0	0	0	0	0	0	0	0	0	1	0	0	0	0	0	0	0	0	0	0	0	0	0	0	0	1	0	0	0	0	0	0	0	0	0	0	0	0	0	0	0	0	0	0
VFG037676(gi:213158544)_(pgaC)_glycosyl_transferase,_family_2_protein_[PNAG_(Polysaccharide_poly-N-acetylglucosamine)_(CVF772)]_[Acinetobacter_baumannii_AB0057]	Acinetobacter_baumannii_AB0057]	pgaC	0	0	2	0	0	0	0	0	0	0	0	0	0	0	0	0	0	0	0	0	0	0	0	0	0	0	0	0	0	0	0	0	0	0	0	0	0	0	0	0	0	0	0	0	0	0	0
VFG037440(gi:213158108)_(basA)_non-ribosomal_peptide_synthetase_[Acinetobactin_(CVF768)]_[Acinetobacter_baumannii_AB0057]	Acinetobacter_baumannii_AB0057]	basA	0	0	2	0	0	0	0	0	0	0	0	0	0	0	0	0	0	0	0	0	0	0	0	0	0	0	0	0	0	0	0	0	0	0	0	0	0	0	0	0	0	0	0	0	0	0	0
VFG038015(gi:213155471)_(AB57_0102)_putative_glycosyl_transferase_family_protein_[Capsule_(CVF775)]_[Acinetobacter_baumannii_AB0057]	Acinetobacter_baumannii_AB0057]	AB57_0102	0	0	2	0	0	0	0	0	0	0	0	0	0	0	0	0	0	0	0	0	0	0	0	0	0	0	0	0	0	0	0	0	0	0	0	0	0	0	0	0	0	0	0	0	0	0	0
VFG038090(gi:213155476)_(AB57_0107)_nucleotide_sugar_epimerase/dehydratase_[Capsule_(CVF775)]_[Acinetobacter_baumannii_AB0057]	Acinetobacter_baumannii_AB0057]	AB57_0107	0	0	2	0	0	0	0	0	0	0	0	0	0	0	0	0	0	0	0	0	0	0	0	0	0	0	0	0	0	0	0	0	0	0	0	0	0	0	0	0	0	0	0	0	0	0	0
VFG037314(gi:213158098)_(entE)_enterobactin_synthase_subunit_E_[Acinetobactin_(CVF768)]_[Acinetobacter_baumannii_AB0057]	Acinetobacter_baumannii_AB0057]	entE	0	0	2	0	0	0	0	0	0	0	0	0	0	0	0	0	0	0	0	0	0	0	0	0	0	0	0	0	0	0	0	0	0	0	0	0	0	0	0	0	0	0	0	0	0	0	0
VFG037201(gi:213157948)_(plcD)_phospholipase_D/transphosphatidylase_[Phospholipase_D_(CVF767)]_[Acinetobacter_baumannii_AB0057]	Acinetobacter_baumannii_AB0057]	plcD	0	0	2	0	0	0	0	0	0	0	0	0	0	0	0	0	0	0	0	0	0	0	0	0	0	0	0	0	0	0	0	0	0	0	0	0	0	0	0	0	0	0	0	0	0	0	0
VFG037760(gi:213155870)_(lpxL)_lipid_A_biosynthesis_acyltransferase_[LPS_(CVF774)]_[Acinetobacter_baumannii_AB0057]	Acinetobacter_baumannii_AB0057]	lpxL	0	0	2	0	0	0	0	0	0	0	0	0	0	0	0	0	0	0	0	0	0	0	0	0	0	0	0	0	0	0	0	0	0	0	0	0	0	0	0	0	0	0	0	0	0	0	0
VFG037636(gi:213157636)_(bap)_biofilm-associated_protein_[Biofilm-associated_protein_(CVF771)]_[Acinetobacter_baumannii_AB0057]	Acinetobacter_baumannii_AB0057]	bap	0	0	2	0	0	0	0	0	0	0	0	0	0	0	0	0	0	0	0	0	0	0	0	0	0	0	0	0	0	0	0	0	0	0	0	0	0	0	0	0	0	0	0	0	0	0	0
VFG037623(gi:213158611)_(csuE)_protein_CsuE_[Csu_pili_(CVF770)]_[Acinetobacter_baumannii_AB0057]	Acinetobacter_baumannii_AB0057]	csuE	0	0	2	0	0	0	0	0	0	0	0	0	0	0	0	0	0	0	0	0	0	0	0	0	0	0	0	0	0	0	0	0	0	0	0	0	0	0	0	0	0	0	0	0	0	0	0
VFG037718(gi:213158705)_(adeG)_RND_family_efflux_transporter_[AdeFGH_efflux_pump/transport_autoinducer_(CVF773)]_[Acinetobacter_baumannii_AB0057]	Acinetobacter_baumannii_AB0057]	adeG	0	0	2	0	0	0	0	0	0	0	0	0	0	0	0	0	0	0	0	0	0	0	0	0	0	0	0	0	0	0	0	0	0	0	0	0	0	0	0	0	0	0	0	0	0	0	0
VFG037412(gi:213158105)_(bauD)_ferric_acinetobactin_transport_system_permease_[Acinetobactin_(CVF768)]_[Acinetobacter_baumannii_AB0057]	Acinetobacter_baumannii_AB0057]	bauD	0	0	2	0	0	0	0	0	0	0	0	0	0	0	0	0	0	0	0	0	0	0	0	0	0	0	0	0	0	0	0	0	0	0	0	0	0	0	0	0	0	0	0	0	0	0	0
VFG037489(gi:213156716)_(AB57_0986)_putative_transmembrane_sensor_protein_FecR_[Heme_utilization__(CVF769)]_[Acinetobacter_baumannii_AB0057]	Acinetobacter_baumannii_AB0057]	AB57_0986	0	0	2	0	0	0	0	0	0	0	0	0	0	0	0	0	0	0	0	0	0	0	0	0	0	0	0	0	0	0	0	0	0	0	0	0	0	0	0	0	0	0	0	0	0	0	0
VFG037172(gi:213155453)_(plc)_phospholipase_C,_phosphocholine-specific_[Phospholipase_C_(CVF766)]_[Acinetobacter_baumannii_AB0057]	Acinetobacter_baumannii_AB0057]	plc	0	0	2	0	0	0	0	0	0	0	0	0	0	0	0	0	0	0	0	0	0	0	0	0	0	0	0	0	0	0	0	0	0	0	0	0	0	0	0	0	0	0	0	0	0	0	0
VFG038163(gi:213155482)_(pgi)_glucose-6-phosphate_isomerase_[Capsule_(CVF775)]_[Acinetobacter_baumannii_AB0057]	Acinetobacter_baumannii_AB0057]	pgi	0	0	2	0	0	0	0	0	0	0	0	0	0	0	0	0	0	0	0	0	0	0	0	0	0	0	0	0	0	0	0	0	0	0	0	0	0	0	0	0	0	0	0	0	0	0	0
VFG037805(gi:213157210)_(lpxB)_lipid-A-disaccharide_synthase_[LPS_(CVF774)]_[Acinetobacter_baumannii_AB0057]	Acinetobacter_baumannii_AB0057]	lpxB	0	0	2	0	0	0	0	0	0	0	0	0	0	0	0	0	0	0	0	0	0	0	0	0	0	0	0	0	0	0	0	0	0	0	0	0	0	0	0	0	0	0	0	0	0	0	0
VFG037690(gi:213158543)_(pgaD)_hypothetical_protein_[PNAG_(Polysaccharide_poly-N-acetylglucosamine)_(CVF772)]_[Acinetobacter_baumannii_AB0057]	Acinetobacter_baumannii_AB0057]	pgaD	0	0	2	0	0	0	0	0	0	0	0	0	0	0	0	0	0	0	0	0	0	0	0	0	0	0	0	0	0	0	0	0	0	0	0	0	0	0	0	0	0	0	0	0	0	0	0
VFG037258(gi:213158093)_(barB)_ABC_transporter_[Acinetobactin_(CVF768)]_[Acinetobacter_baumannii_AB0057]	Acinetobacter_baumannii_AB0057]	barB	0	0	2	0	0	0	0	0	0	0	0	0	0	0	0	0	0	0	0	0	0	0	0	0	0	0	0	0	0	0	0	0	0	0	0	0	0	0	0	0	0	0	0	0	0	0	0
VFG037356(gi:213158101)_(bauA)_ferric_acinetobactin_receptor_[Acinetobactin_(CVF768)]_[Acinetobacter_baumannii_AB0057]	Acinetobacter_baumannii_AB0057]	bauA	0	0	2	0	0	0	0	0	0	0	0	0	0	0	0	0	0	0	0	0	0	0	0	0	0	0	0	0	0	0	0	0	0	0	0	0	0	0	0	0	0	0	0	0	0	0	0
VFG038247(gi:213155690)_(pbpG)_D-alanyl-D-alanine_carboxypeptidase_[PbpG_(CVF779)]_[Acinetobacter_baumannii_AB0057]	Acinetobacter_baumannii_AB0057]	pbpG	0	0	2	0	0	0	0	0	0	0	0	0	0	0	0	0	0	0	0	0	0	0	0	0	0	0	0	0	0	0	0	0	0	0	0	0	0	0	0	0	0	0	0	0	0	0	0
VFG037648(gi:213158547)_(pgaA)_hypothetical_protein_[PNAG_(Polysaccharide_poly-N-acetylglucosamine)_(CVF772)]_[Acinetobacter_baumannii_AB0057]	Acinetobacter_baumannii_AB0057]	pgaA	0	0	2	0	0	0	0	0	0	0	0	0	0	0	0	0	0	0	0	0	0	0	0	0	0	0	0	0	0	0	0	0	0	0	0	0	0	0	0	0	0	0	0	0	0	0	0
VFG038168(gi:213155483)_(galE)_UDP-glucose_4-epimerase_[Capsule_(CVF775)]_[Acinetobacter_baumannii_AB0057]	Acinetobacter_baumannii_AB0057]	galE	0	0	2	0	0	0	0	0	0	0	0	0	0	0	0	0	0	0	0	0	0	0	0	0	0	0	0	0	0	0	0	0	0	0	0	0	0	0	0	0	0	0	0	0	0	0	0
VFG038118(gi:213155478)_(AB57_0109)_hypothetical_protein_[Capsule_(CVF775)]_[Acinetobacter_baumannii_AB0057]	Acinetobacter_baumannii_AB0057]	AB57_0109	0	0	2	0	0	0	0	0	0	0	0	0	0	0	0	0	0	0	0	0	0	0	0	0	0	0	0	0	0	0	0	0	0	0	0	0	0	0	0	0	0	0	0	0	0	0	0
VFG037662(gi:213158545)_(pgaB)_polysaccharide_deacetylase_[PNAG_(Polysaccharide_poly-N-acetylglucosamine)_(CVF772)]_[Acinetobacter_baumannii_AB0057]	Acinetobacter_baumannii_AB0057]	pgaB	0	0	2	0	0	0	0	0	0	0	0	0	0	0	0	0	0	0	0	0	0	0	0	0	0	0	0	0	0	0	0	0	0	0	0	0	0	0	0	0	0	0	0	0	0	0	0
VFG037850(gi:213155460)_(AB57_0091)_tyrosine-protein_kinase_ptk_[Capsule_(CVF775)]_[Acinetobacter_baumannii_AB0057]	Acinetobacter_baumannii_AB0057]	AB57_0091	0	0	2	0	0	0	0	0	0	0	0	0	0	0	0	0	0	0	0	0	0	0	0	0	0	0	0	0	0	0	0	0	0	0	0	0	0	0	0	0	0	0	0	0	0	0	0
VFG037496(gi:213156717)_(AB57_0987)_hypothetical_protein_[Heme_utilization__(CVF769)]_[Acinetobacter_baumannii_AB0057]	Acinetobacter_baumannii_AB0057]	AB57_0987	0	0	2	0	0	0	0	0	0	0	0	0	0	0	0	0	0	0	0	0	0	0	0	0	0	0	0	0	0	0	0	0	0	0	0	0	0	0	0	0	0	0	0	0	0	0	0
VFG037970(gi:213155468)_(AB57_0099)_group_1_glycosyl_transferase_[Capsule_(CVF775)]_[Acinetobacter_baumannii_AB0057]	Acinetobacter_baumannii_AB0057]	AB57_0099	0	0	2	0	0	0	0	0	0	0	0	0	0	0	0	0	0	0	0	0	0	0	0	0	0	0	0	0	0	0	0	0	0	0	0	0	0	0	0	0	0	0	0	0	0	0	0
VFG037398(gi:213158104)_(bauC)_ferric_acinetobactin_transport_system_permease_[Acinetobactin_(CVF768)]_[Acinetobacter_baumannii_AB0057]	Acinetobacter_baumannii_AB0057]	bauC	0	0	2	0	0	0	0	0	0	0	0	0	0	0	0	0	0	0	0	0	0	0	0	0	0	0	0	0	0	0	0	0	0	0	0	0	0	0	0	0	0	0	0	0	0	0	0
VFG038232(gi:213156533)_(bfmS)_two-component_system_sensor_kinase_protein_[Two-component_system_(CVF778)]_[Acinetobacter_baumannii_AB0057]	Acinetobacter_baumannii_AB0057]	bfmS	0	0	2	0	0	0	0	0	0	0	0	0	0	0	0	0	0	0	0	0	0	0	0	0	0	0	0	0	0	0	0	0	0	0	0	0	0	0	0	0	0	0	0	0	0	0	0
VFG037328(gi:213158099)_(basD)_nonribosomal_peptide_synthetase_BasD_[Acinetobactin_(CVF768)]_[Acinetobacter_baumannii_AB0057]	Acinetobacter_baumannii_AB0057]	basD	0	0	2	0	0	0	0	0	0	0	0	0	0	0	0	0	0	0	0	0	0	0	0	0	0	0	0	0	0	0	0	0	0	0	0	0	0	0	0	0	0	0	0	0	0	0	0
VFG038189(gi:213155520)_(abaI)_homoserine_lactone_synthase_[Quorum_sensing_(CVF777)]_[Acinetobacter_baumannii_AB0057]	Acinetobacter_baumannii_AB0057]	abaI	0	0	2	0	0	0	0	0	0	0	0	0	0	0	0	0	0	0	0	0	0	0	0	0	0	0	0	0	0	0	0	0	0	0	0	0	0	0	0	0	0	0	0	0	0	0	0
VFG038203(gi:213155522)_(abaR)_eR_transcriptional_regulator_[Quorum_sensing_(CVF777)]_[Acinetobacter_baumannii_AB0057]	Acinetobacter_baumannii_AB0057]	abaR	0	0	2	0	0	0	0	0	0	0	0	0	0	0	0	0	0	0	0	0	0	0	0	0	0	0	0	0	0	0	0	0	0	0	0	0	0	0	0	0	0	0	0	0	0	0	0
VFG038060(gi:213155474)_(AB57_0105)_polyprenol_phosphate:N-acetyl-hexosamine_1-phosphate_transferase_[Capsule_(CVF775)]_[Acinetobacter_baumannii_AB0057]	Acinetobacter_baumannii_AB0057]	AB57_0105	0	0	2	0	0	0	0	0	0	0	0	0	0	0	0	0	0	0	0	0	0	0	0	0	0	0	0	0	0	0	0	0	0	0	0	0	0	0	0	0	0	0	0	0	0	0	0
VFG037925(gi:213155465)_(AB57_0096)_polysaccharide_biosynthesis_protein_[Capsule_(CVF775)]_[Acinetobacter_baumannii_AB0057]	Acinetobacter_baumannii_AB0057]	AB57_0096	0	0	2	0	0	0	0	0	0	0	0	0	0	0	0	0	0	0	0	0	0	0	0	0	0	0	0	0	0	0	0	0	0	0	0	0	0	0	0	0	0	0	0	0	0	0	0
VFG037426(gi:213158107)_(basB)_non-ribosomal_peptide_synthetase_[Acinetobactin_(CVF768)]_[Acinetobacter_baumannii_AB0057]	Acinetobacter_baumannii_AB0057]	basB	0	0	2	0	0	0	0	0	0	0	0	0	0	0	0	0	0	0	0	0	0	0	0	0	0	0	0	0	0	0	0	0	0	0	0	0	0	0	0	0	0	0	0	0	0	0	0
VFG037536(gi:213156722)_(AB57_0992)_hypothetical_protein_[Heme_utilization__(CVF769)]_[Acinetobacter_baumannii_AB0057]	Acinetobacter_baumannii_AB0057]	AB57_0992	0	0	2	0	0	0	0	0	0	0	0	0	0	0	0	0	0	0	0	0	0	0	0	0	0	0	0	0	0	0	0	0	0	0	0	0	0	0	0	0	0	0	0	0	0	0	0
VFG038030(gi:213155472)_(AB57_0103)_group_1_glycosyl_transferase_[Capsule_(CVF775)]_[Acinetobacter_baumannii_AB0057]	Acinetobacter_baumannii_AB0057]	AB57_0103	0	0	2	0	0	0	0	0	0	0	0	0	0	0	0	0	0	0	0	0	0	0	0	0	0	0	0	0	0	0	0	0	0	0	0	0	0	0	0	0	0	0	0	0	0	0	0
VFG037610(gi:213158612)_(csuD)_protein_CsuD_[Csu_pili_(CVF770)]_[Acinetobacter_baumannii_AB0057]	Acinetobacter_baumannii_AB0057]	csuD	0	0	2	0	0	0	0	0	0	0	0	0	0	0	0	0	0	0	0	0	0	0	0	0	0	0	0	0	0	0	0	0	0	0	0	0	0	0	0	0	0	0	0	0	0	0	0
VFG037504(gi:213156718)_(AB57_0988)_hypothetical_protein_[Heme_utilization__(CVF769)]_[Acinetobacter_baumannii_AB0057]	Acinetobacter_baumannii_AB0057]	AB57_0988	0	0	2	0	0	0	0	0	0	0	0	0	0	0	0	0	0	0	0	0	0	0	0	0	0	0	0	0	0	0	0	0	0	0	0	0	0	0	0	0	0	0	0	0	0	0	0
VFG037835(gi:213158366)_(lpxD)_UDP-3-O-[3-hydroxymyristoyl]_glucosamine_N-acyltransferase_[LPS_(CVF774)]_[Acinetobacter_baumannii_AB0057]	Acinetobacter_baumannii_AB0057]	lpxD	0	0	2	0	0	0	0	0	0	0	0	0	0	0	0	0	0	0	0	0	0	0	0	0	0	0	0	0	0	0	0	0	0	0	0	0	0	0	0	0	0	0	0	0	0	0	0
VFG037910(gi:213155464)_(AB57_0095)_VI_polysaccharide_biosynthesis_protein_VipB/tviC_[Capsule_(CVF775)]_[Acinetobacter_baumannii_AB0057]	Acinetobacter_baumannii_AB0057]	AB57_0095	0	0	2	0	0	0	0	0	0	0	0	0	0	0	0	0	0	0	0	0	0	0	0	0	0	0	0	0	0	0	0	0	0	0	0	0	0	0	0	0	0	0	0	0	0	0	0
VFG038154(gi:213155481)_(AB57_0112)_NDP-sugar_dehydrogenase_[Capsule_(CVF775)]_[Acinetobacter_baumannii_AB0057]	Acinetobacter_baumannii_AB0057]	AB57_0112	0	0	2	0	0	0	0	0	0	0	0	0	0	0	0	0	0	0	0	0	0	0	0	0	0	0	0	0	0	0	0	0	0	0	0	0	0	0	0	0	0	0	0	0	0	0	0
VFG037703(gi:213158704)_(adeF)_RND_family_efflux_transporter_[AdeFGH_efflux_pump/transport_autoinducer_(CVF773)]_[Acinetobacter_baumannii_AB0057]	Acinetobacter_baumannii_AB0057]	adeF	0	0	2	0	0	0	0	0	0	0	0	0	0	0	0	0	0	0	0	0	0	0	0	0	0	0	0	0	0	0	0	0	0	0	0	0	0	0	0	0	0	0	0	0	0	0	0
VFG037880(gi:213155462)_(AB57_0093)_polysaccharide_export_protein_[Capsule_(CVF775)]_[Acinetobacter_baumannii_AB0057]	Acinetobacter_baumannii_AB0057]	AB57_0093	0	0	2	0	0	0	0	0	0	0	0	0	0	0	0	0	0	0	0	0	0	0	0	0	0	0	0	0	0	0	0	0	0	0	0	0	0	0	0	0	0	0	0	0	0	0	0
VFG037940(gi:213155466)_(AB57_0097)_hypothetical_protein_[Capsule_(CVF775)]_[Acinetobacter_baumannii_AB0057]	Acinetobacter_baumannii_AB0057]	AB57_0097	0	0	2	0	0	0	0	0	0	0	0	0	0	0	0	0	0	0	0	0	0	0	0	0	0	0	0	0	0	0	0	0	0	0	0	0	0	0	0	0	0	0	0	0	0	0	0
VFG038045(gi:213155473)_(AB57_0104)_UDP-glucose_4-epimerase_[Capsule_(CVF775)]_[Acinetobacter_baumannii_AB0057]	Acinetobacter_baumannii_AB0057]	AB57_0104	0	0	2	0	0	0	0	0	0	0	0	0	0	0	0	0	0	0	0	0	0	0	0	0	0	0	0	0	0	0	0	0	0	0	0	0	0	0	0	0	0	0	0	0	0	0	0
VFG038104(gi:213155477)_(galE)_UDP-glucose_4-epimerase_[Capsule_(CVF775)]_[Acinetobacter_baumannii_AB0057]	Acinetobacter_baumannii_AB0057]	galE	0	0	2	0	0	0	0	0	0	0	0	0	0	0	0	0	0	0	0	0	0	0	0	0	0	0	0	0	0	0	0	0	0	0	0	0	0	0	0	0	0	0	0	0	0	0	0
VFG037528(gi:213156721)_(hemO)_heme_oxygenase_[Heme_utilization__(CVF769)]_[Acinetobacter_baumannii_AB0057]	Acinetobacter_baumannii_AB0057]	hemO	0	0	2	0	0	0	0	0	0	0	0	0	0	0	0	0	0	0	0	0	0	0	0	0	0	0	0	0	0	0	0	0	0	0	0	0	0	0	0	0	0	0	0	0	0	0	0
VFG037272(gi:213158094)_(barA)_ABC_transporter_[Acinetobactin_(CVF768)]_[Acinetobacter_baumannii_AB0057]	Acinetobacter_baumannii_AB0057]	barA	0	0	2	0	0	0	0	0	0	0	0	0	0	0	0	0	0	0	0	0	0	0	0	0	0	0	0	0	0	0	0	0	0	0	0	0	0	0	0	0	0	0	0	0	0	0	0
VFG037512(gi:213156719)_(AB57_0989)_hypothetical_protein_[Heme_utilization__(CVF769)]_[Acinetobacter_baumannii_AB0057]	Acinetobacter_baumannii_AB0057]	AB57_0989	0	0	2	0	0	0	0	0	0	0	0	0	0	0	0	0	0	0	0	0	0	0	0	0	0	0	0	0	0	0	0	0	0	0	0	0	0	0	0	0	0	0	0	0	0	0	0
VFG037985(gi:213155469)_(AB57_0100)_hypothetical_protein_[Capsule_(CVF775)]_[Acinetobacter_baumannii_AB0057]	Acinetobacter_baumannii_AB0057]	AB57_0100	0	0	2	0	0	0	0	0	0	0	0	0	0	0	0	0	0	0	0	0	0	0	0	0	0	0	0	0	0	0	0	0	0	0	0	0	0	0	0	0	0	0	0	0	0	0	0
VFG037545(gi:213156723)_(AB57_0993)_hypothetical_protein_[Heme_utilization__(CVF769)]_[Acinetobacter_baumannii_AB0057]	Acinetobacter_baumannii_AB0057]	AB57_0993	0	0	2	0	0	0	0	0	0	0	0	0	0	0	0	0	0	0	0	0	0	0	0	0	0	0	0	0	0	0	0	0	0	0	0	0	0	0	0	0	0	0	0	0	0	0	0
VFG037597(gi:213158613)_(csuC)_protein_CsuC_[Csu_pili_(CVF770)]_[Acinetobacter_baumannii_AB0057]	Acinetobacter_baumannii_AB0057]	csuC	0	0	2	0	0	0	0	0	0	0	0	0	0	0	0	0	0	0	0	0	0	0	0	0	0	0	0	0	0	0	0	0	0	0	0	0	0	0	0	0	0	0	0	0	0	0	0
VFG037775(gi:213155869)_(lpsB)_group_1_glycosyl_transferase_[LPS_(CVF774)]_[Acinetobacter_baumannii_AB0057]	Acinetobacter_baumannii_AB0057]	lpsB	0	0	2	0	0	0	0	0	0	0	0	0	0	0	0	0	0	0	0	0	0	0	0	0	0	0	0	0	0	0	0	0	0	0	0	0	0	0	0	0	0	0	0	0	0	0	0
VFG037520(gi:213156720)_(AB57_0990)_TonB_family_protein_[Heme_utilization__(CVF769)]_[Acinetobacter_baumannii_AB0057]	Acinetobacter_baumannii_AB0057]	AB57_0990	0	0	2	0	0	0	0	0	0	0	0	0	0	0	0	0	0	0	0	0	0	0	0	0	0	0	0	0	0	0	0	0	0	0	0	0	0	0	0	0	0	0	0	0	0	0	0
VFG037733(gi:213158706)_(adeH)_multidrug_efflux_system_outer_membrane_protein_[AdeFGH_efflux_pump/transport_autoinducer_(CVF773)]_[Acinetobacter_baumannii_AB0057]	Acinetobacter_baumannii_AB0057]	adeH	0	0	2	0	0	0	0	0	0	0	0	0	0	0	0	0	0	0	0	0	0	0	0	0	0	0	0	0	0	0	0	0	0	0	0	0	0	0	0	0	0	0	0	0	0	0	0
VFG038143(gi:213155480)_(galU)_UTP-glucose-1-phosphate_uridylyltransferase_[Capsule_(CVF775)]_[Acinetobacter_baumannii_AB0057]	Acinetobacter_baumannii_AB0057]	galU	0	0	2	0	0	0	0	0	0	0	0	0	0	0	0	0	0	0	0	0	0	0	0	0	0	0	0	0	0	0	0	0	0	0	0	0	0	0	0	0	0	0	0	0	0	0	0
VFG037384(gi:213158103)_(bauE)_ferric_acinetobactin_transport_system_ATP-binding_protein_[Acinetobactin_(CVF768)]_[Acinetobacter_baumannii_AB0057]	Acinetobacter_baumannii_AB0057]	bauE	0	0	2	0	0	0	0	0	0	0	0	0	0	0	0	0	0	0	0	0	0	0	0	0	0	0	0	0	0	0	0	0	0	0	0	0	0	0	0	0	0	0	0	0	0	0	0
VFG037300(gi:213158097)_(basF)_2,3_dihydro-2,3_dihydroxybenzoate_synthase_[Acinetobactin_(CVF768)]_[Acinetobacter_baumannii_AB0057]	Acinetobacter_baumannii_AB0057]	basF	0	0	2	0	0	0	0	0	0	0	0	0	0	0	0	0	0	0	0	0	0	0	0	0	0	0	0	0	0	0	0	0	0	0	0	0	0	0	0	0	0	0	0	0	0	0	0
VFG037558(gi:213158616)_(csuA/B)_protein_CsuA/B_[Csu_pili_(CVF770)]_[Acinetobacter_baumannii_AB0057]	Acinetobacter_baumannii_AB0057]	csuA/B	0	0	2	0	0	0	0	0	0	0	0	0	0	0	0	0	0	0	0	0	0	0	0	0	0	0	0	0	0	0	0	0	0	0	0	0	0	0	0	0	0	0	0	0	0	0	0
VFG037820(gi:213159071)_(lpxC)_UDP-3-O-[3-hydroxymyristoyl]_N-acetylglucosamine_deacetylase_[LPS_(CVF774)]_[Acinetobacter_baumannii_AB0057]	Acinetobacter_baumannii_AB0057]	lpxC	0	0	2	0	0	0	0	0	0	0	0	0	0	0	0	0	0	0	0	0	0	0	0	0	0	0	0	0	0	0	0	0	0	0	0	0	0	0	0	0	0	0	0	0	0	0	0
VFG037865(gi:213155461)_(AB57_0092)_protein-tyrosine-phosphatase_ptp_[Capsule_(CVF775)]_[Acinetobacter_baumannii_AB0057]	Acinetobacter_baumannii_AB0057]	AB57_0092	0	0	2	0	0	0	0	0	0	0	0	0	0	0	0	0	0	0	0	0	0	0	0	0	0	0	0	0	0	0	0	0	0	0	0	0	0	0	0	0	0	0	0	0	0	0	0
VFG037454(gi:213158110)_(bauF)_siderophore-interacting_protein_[Acinetobactin_(CVF768)]_[Acinetobacter_baumannii_AB0057]	Acinetobacter_baumannii_AB0057]	bauF	0	0	2	0	0	0	0	0	0	0	0	0	0	0	0	0	0	0	0	0	0	0	0	0	0	0	0	0	0	0	0	0	0	0	0	0	0	0	0	0	0	0	0	0	0	0	0
VFG037342(gi:213158100)_(basC)_nonribosomal_peptide_synthetase_BasC_[Acinetobactin_(CVF768)]_[Acinetobacter_baumannii_AB0057]	Acinetobacter_baumannii_AB0057]	basC	0	0	2	0	0	0	0	0	0	0	0	0	0	0	0	0	0	0	0	0	0	0	0	0	0	0	0	0	0	0	0	0	0	0	0	0	0	0	0	0	0	0	0	0	0	0	0
VFG037468(gi:213156714)_(AB57_0984)_transcriptional_regulator,_LysR_family_[Heme_utilization__(CVF769)]_[Acinetobacter_baumannii_AB0057]	Acinetobacter_baumannii_AB0057]	AB57_0984	0	0	2	0	0	0	0	0	0	0	0	0	0	0	0	0	0	0	0	0	0	0	0	0	0	0	0	0	0	0	0	0	0	0	0	0	0	0	0	0	0	0	0	0	0	0	0
VFG038174(gi:213157857)_(ompA)_outer_membrane_protein_A_[Outer_membrane_protein_(CVF776)]_[Acinetobacter_baumannii_AB0057]	Acinetobacter_baumannii_AB0057]	ompA	0	0	2	0	0	0	0	0	0	0	0	0	0	0	0	0	0	0	0	0	0	0	0	0	0	0	0	0	0	0	0	0	0	0	0	0	0	0	0	0	0	0	0	0	0	0	0
VFG037746(gi:213158295)_(lpxM)_lipid_A_biosynthesis_acyltransferase_[LPS_(CVF774)]_[Acinetobacter_baumannii_AB0057]	Acinetobacter_baumannii_AB0057]	lpxM	0	0	2	0	0	0	0	0	0	0	0	0	0	0	0	0	0	0	0	0	0	0	0	0	0	0	0	0	0	0	0	0	0	0	0	0	0	0	0	0	0	0	0	0	0	0	0
VFG038170(gi:213155484)_(AB57_0115)_phosphomannomutase_[Capsule_(CVF775)]_[Acinetobacter_baumannii_AB0057]	Acinetobacter_baumannii_AB0057]	AB57_0115	0	0	2	0	0	0	0	0	0	0	0	0	0	0	0	0	0	0	0	0	0	0	0	0	0	0	0	0	0	0	0	0	0	0	0	0	0	0	0	0	0	0	0	0	0	0	0
VFG037173(gi:213158427)_(plc)_phospholipase_C,_phosphocholine-specific_[Phospholipase_C_(CVF766)]_[Acinetobacter_baumannii_AB0057]	Acinetobacter_baumannii_AB0057]	plc	0	0	2	0	0	0	0	0	0	0	0	0	0	0	0	0	0	0	0	0	0	0	0	0	0	0	0	0	0	0	0	0	0	0	0	0	0	0	0	0	0	0	0	0	0	0	0
VFG037790(gi:213158364)_(lpxA)_UDP-N-acetylglucosamine_acyltransferase_[LPS_(CVF774)]_[Acinetobacter_baumannii_AB0057]	Acinetobacter_baumannii_AB0057]	lpxA	0	0	2	0	0	0	0	0	0	0	0	0	0	0	0	0	0	0	0	0	0	0	0	0	0	0	0	0	0	0	0	0	0	0	0	0	0	0	0	0	0	0	0	0	0	0	0
VFG037571(gi:213158615)_(csuA)_protein_CsuA_[Csu_pili_(CVF770)]_[Acinetobacter_baumannii_AB0057]	Acinetobacter_baumannii_AB0057]	csuA	0	0	2	0	0	0	0	0	0	0	0	0	0	0	0	0	0	0	0	0	0	0	0	0	0	0	0	0	0	0	0	0	0	0	0	0	0	0	0	0	0	0	0	0	0	0	0
VFG037230(gi:213158091)_(basI)_acinetobactin_biosynthesis_protein_[Acinetobactin_(CVF768)]_[Acinetobacter_baumannii_AB0057]	Acinetobacter_baumannii_AB0057]	basI	0	0	2	0	0	0	0	0	0	0	0	0	0	0	0	0	0	0	0	0	0	0	0	0	0	0	0	0	0	0	0	0	0	0	0	0	0	0	0	0	0	0	0	0	0	0	0
VFG037481(gi:213156715)_(AB57_0985)_RNA_polymerase_sigma_factor_FecI_[Heme_utilization__(CVF769)]_[Acinetobacter_baumannii_AB0057]	Acinetobacter_baumannii_AB0057]	AB57_0985	0	0	2	0	0	0	0	0	0	0	0	0	0	0	0	0	0	0	0	0	0	0	0	0	0	0	0	0	0	0	0	0	0	0	0	0	0	0	0	0	0	0	0	0	0	0	0
VFG037216(gi:213158090)_(basJ)_acinetobactin_biosynthesis_protein_[Acinetobactin_(CVF768)]_[Acinetobacter_baumannii_AB0057]	Acinetobacter_baumannii_AB0057]	basJ	0	0	2	0	0	0	0	0	0	0	0	0	0	0	0	0	0	0	0	0	0	0	0	0	0	0	0	0	0	0	0	0	0	0	0	0	0	0	0	0	0	0	0	0	0	0	0
VFG037584(gi:213158614)_(csuB)_protein_CsuB_[Csu_pili_(CVF770)]_[Acinetobacter_baumannii_AB0057]	Acinetobacter_baumannii_AB0057]	csuB	0	0	2	0	0	0	0	0	0	0	0	0	0	0	0	0	0	0	0	0	0	0	0	0	0	0	0	0	0	0	0	0	0	0	0	0	0	0	0	0	0	0	0	0	0	0	0
VFG037244(gi:213158092)_(basH)_acinetobactin_biosynthesis_protein_[Acinetobactin_(CVF768)]_[Acinetobacter_baumannii_AB0057]	Acinetobacter_baumannii_AB0057]	basH	0	0	2	0	0	0	0	0	0	0	0	0	0	0	0	0	0	0	0	0	0	0	0	0	0	0	0	0	0	0	0	0	0	0	0	0	0	0	0	0	0	0	0	0	0	0	0
VFG038217(gi:213156532)_(bfmR)_two-component_system_response_regulator_protein_[Two-component_system_(CVF778)]_[Acinetobacter_baumannii_AB0057]	Acinetobacter_baumannii_AB0057]	bfmR	0	0	2	0	0	0	0	0	0	0	0	0	0	0	0	0	0	0	0	0	0	0	0	0	0	0	0	0	0	0	0	0	0	0	0	0	0	0	0	0	0	0	0	0	0	0	0
VFG037370(gi:213158102)_(bauB)_ferric_acinetobactin_transport_system_periplasmic_binding_protein_[Acinetobactin_(CVF768)]_[Acinetobacter_baumannii_AB0057]	Acinetobacter_baumannii_AB0057]	bauB	0	0	2	0	0	0	0	0	0	0	0	0	0	0	0	0	0	0	0	0	0	0	0	0	0	0	0	0	0	0	0	0	0	0	0	0	0	0	0	0	0	0	0	0	0	0	0
VFG037286(gi:213158096)_(basG)_histidine_decarboxylase_[Acinetobactin_(CVF768)]_[Acinetobacter_baumannii_AB0057]	Acinetobacter_baumannii_AB0057]	basG	0	0	2	0	0	0	0	0	0	0	0	0	0	0	0	0	0	0	0	0	0	0	0	0	0	0	0	0	0	0	0	0	0	0	0	0	0	0	0	0	0	0	0	0	0	0	0
VFG038000(gi:213155470)_(AB57_0101)_hypothetical_protein_[Capsule_(CVF775)]_[Acinetobacter_baumannii_AB0057]	Acinetobacter_baumannii_AB0057]	AB57_0101	0	0	2	0	0	0	0	0	0	0	0	0	0	0	0	0	0	0	0	0	0	0	0	0	0	0	0	0	0	0	0	0	0	0	0	0	0	0	0	0	0	0	0	0	0	0	0
VFG038075(gi:213155475)_(AB57_0106)_acetyltransferase_[Capsule_(CVF775)]_[Acinetobacter_baumannii_AB0057]	Acinetobacter_baumannii_AB0057]	AB57_0106	0	0	2	0	0	0	0	0	0	0	0	0	0	0	0	0	0	0	0	0	0	0	0	0	0	0	0	0	0	0	0	0	0	0	0	0	0	0	0	0	0	0	0	0	0	0	0
VFG037955(gi:213155467)_(AB57_0098)_hypothetical_protein_[Capsule_(CVF775)]_[Acinetobacter_baumannii_AB0057]	Acinetobacter_baumannii_AB0057]	AB57_0098	0	0	2	0	0	0	0	0	0	0	0	0	0	0	0	0	0	0	0	0	0	0	0	0	0	0	0	0	0	0	0	0	0	0	0	0	0	0	0	0	0	0	0	0	0	0	0
VFG038131(gi:213155479)_(AB57_0110)_acyltransferase_[Capsule_(CVF775)]_[Acinetobacter_baumannii_AB0057]	Acinetobacter_baumannii_AB0057]	AB57_0110	0	0	2	0	0	0	0	0	0	0	0	0	0	0	0	0	0	0	0	0	0	0	0	0	0	0	0	0	0	0	0	0	0	0	0	0	0	0	0	0	0	0	0	0	0	0	0
VFG038031(gi:215485089)_(ABBFA_003458)_protein_capL_[Capsule_(CVF775)]_[Acinetobacter_baumannii_AB307-0294]	Acinetobacter_baumannii_AB307-0294]	ABBFA_003458	0	0	2	0	0	0	0	0	0	0	0	0	0	0	0	0	0	0	0	0	0	0	0	0	0	0	0	0	0	0	0	0	0	0	0	0	0	0	0	0	0	0	0	0	0	0	0
VFG037273(gi:215482776)_(barA)_ABC_transporter_family_protein_[Acinetobactin_(CVF768)]_[Acinetobacter_baumannii_AB307-0294]	Acinetobacter_baumannii_AB307-0294]	barA	0	0	2	0	0	0	0	0	0	0	0	0	0	0	0	0	0	0	0	0	0	0	0	0	0	0	0	0	0	0	0	0	0	0	0	0	0	0	0	0	0	0	0	0	0	0	0
VFG037315(gi:215482772)_(entE)_enterobactin_synthase_subunit_E_[Acinetobactin_(CVF768)]_[Acinetobacter_baumannii_AB307-0294]	Acinetobacter_baumannii_AB307-0294]	entE	0	0	2	0	0	0	0	0	0	0	0	0	0	0	0	0	0	0	0	0	0	0	0	0	0	0	0	0	0	0	0	0	0	0	0	0	0	0	0	0	0	0	0	0	0	0	0
VFG037851(gi:215485077)_(ABBFA_003446)_phosphomannomutase(PMM)_[Capsule_(CVF775)]_[Acinetobacter_baumannii_AB307-0294]	Acinetobacter_baumannii_AB307-0294]	ABBFA_003446	0	0	2	0	0	0	0	0	0	0	0	0	0	0	0	0	0	0	0	0	0	0	0	0	0	0	0	0	0	0	0	0	0	0	0	0	0	0	0	0	0	0	0	0	0	0	0
VFG038046(gi:215485090)_(ABBFA_003459)_EPS_I_polysaccharide_export_outer_membrane_protein_epsA_precursor_[Capsule_(CVF775)]_[Acinetobacter_baumannii_AB307-0294]	Acinetobacter_baumannii_AB307-0294]	ABBFA_003459	0	0	2	0	0	0	0	0	0	0	0	0	0	0	0	0	0	0	0	0	0	0	0	0	0	0	0	0	0	0	0	0	0	0	0	0	0	0	0	0	0	0	0	0	0	0	0
VFG037866(gi:215485078)_(pgi)_glucose-6-phosphate_isomerase_[Capsule_(CVF775)]_[Acinetobacter_baumannii_AB307-0294]	Acinetobacter_baumannii_AB307-0294]	pgi	0	0	2	0	0	0	0	0	0	0	0	0	0	0	0	0	0	0	0	0	0	0	0	0	0	0	0	0	0	0	0	0	0	0	0	0	0	0	0	0	0	0	0	0	0	0	0
VFG037926(gi:215485082)_(ABBFA_003451)_spore_coat_polysaccharide_biosynthesis_protein_spsC_[Capsule_(CVF775)]_[Acinetobacter_baumannii_AB307-0294]	Acinetobacter_baumannii_AB307-0294]	ABBFA_003451	0	0	2	0	0	0	0	0	0	0	0	0	0	0	0	0	0	0	0	0	0	0	0	0	0	0	0	0	0	0	0	0	0	0	0	0	0	0	0	0	0	0	0	0	0	0	0
VFG037357(gi:215482769)_(bauA)_ferric_anguibactin_receptor_precursor_(OM2)_[Acinetobactin_(CVF768)]_[Acinetobacter_baumannii_AB307-0294]	Acinetobacter_baumannii_AB307-0294]	bauA	0	0	2	0	0	0	0	0	0	0	0	0	0	0	0	0	0	0	0	0	0	0	0	0	0	0	0	0	0	0	0	0	0	0	0	0	0	0	0	0	0	0	0	0	0	0	0
VFG037986(gi:215485086)_(ABBFA_003455)_hypothetical_protein_[Capsule_(CVF775)]_[Acinetobacter_baumannii_AB307-0294]	Acinetobacter_baumannii_AB307-0294]	ABBFA_003455	0	0	2	0	0	0	0	0	0	0	0	0	0	0	0	0	0	0	0	0	0	0	0	0	0	0	0	0	0	0	0	0	0	0	0	0	0	0	0	0	0	0	0	0	0	0	0
VFG038016(gi:215485088)_(ABBFA_003457)_Vi_polysaccharide_biosynthesis_protein_vipB/tviC_[Capsule_(CVF775)]_[Acinetobacter_baumannii_AB307-0294]	Acinetobacter_baumannii_AB307-0294]	ABBFA_003457	0	0	2	0	0	0	0	0	0	0	0	0	0	0	0	0	0	0	0	0	0	0	0	0	0	0	0	0	0	0	0	0	0	0	0	0	0	0	0	0	0	0	0	0	0	0	0
VFG037649(gi:215483000)_(pgaA)_Biofilm_PGA_synthesis_protein_pgaA_precursor_[PNAG_(Polysaccharide_poly-N-acetylglucosamine)_(CVF772)]_[Acinetobacter_baumannii_AB307-0294]	Acinetobacter_baumannii_AB307-0294]	pgaA	0	0	2	0	0	0	0	0	0	0	0	0	0	0	0	0	0	0	0	0	0	0	0	0	0	0	0	0	0	0	0	0	0	0	0	0	0	0	0	0	0	0	0	0	0	0	0
VFG037836(gi:215483175)_(lpxD)_UDP-3-O-[3-hydroxymyristoyl]_glucosamine_N-acyltransferase_[LPS_(CVF774)]_[Acinetobacter_baumannii_AB307-0294]	Acinetobacter_baumannii_AB307-0294]	lpxD	0	0	2	0	0	0	0	0	0	0	0	0	0	0	0	0	0	0	0	0	0	0	0	0	0	0	0	0	0	0	0	0	0	0	0	0	0	0	0	0	0	0	0	0	0	0	0
VFG037329(gi:215482771)_(basD)_High-molecular-weight_protein_2_(HMWP2)_[Acinetobactin_(CVF768)]_[Acinetobacter_baumannii_AB307-0294]	Acinetobacter_baumannii_AB307-0294]	basD	0	0	2	0	0	0	0	0	0	0	0	0	0	0	0	0	0	0	0	0	0	0	0	0	0	0	0	0	0	0	0	0	0	0	0	0	0	0	0	0	0	0	0	0	0	0	0
VFG038061(gi:215485091)_(ABBFA_003460)_Low_molecular_weight_protein-tyrosine-phosphatase_ptp_[Capsule_(CVF775)]_[Acinetobacter_baumannii_AB307-0294]	Acinetobacter_baumannii_AB307-0294]	ABBFA_003460	0	0	2	0	0	0	0	0	0	0	0	0	0	0	0	0	0	0	0	0	0	0	0	0	0	0	0	0	0	0	0	0	0	0	0	0	0	0	0	0	0	0	0	0	0	0	0
VFG037956(gi:215485084)_(ABBFA_003453)_WbnE_[Capsule_(CVF775)]_[Acinetobacter_baumannii_AB307-0294]	Acinetobacter_baumannii_AB307-0294]	ABBFA_003453	0	0	2	0	0	0	0	0	0	0	0	0	0	0	0	0	0	0	0	0	0	0	0	0	0	0	0	0	0	0	0	0	0	0	0	0	0	0	0	0	0	0	0	0	0	0	0
VFG037637(gi:217322913)_(bap)_hypothetical_protein_[Biofilm-associated_protein_(CVF771)]_[Acinetobacter_baumannii_AB307-0294]	Acinetobacter_baumannii_AB307-0294]	bap	0	0	2	0	0	0	0	0	0	0	0	0	0	0	0	0	0	0	0	0	0	0	0	0	0	0	0	0	0	0	0	0	0	0	0	0	0	0	0	0	0	0	0	0	0	0	0
VFG037455(gi:215482762)_(bauF)_Vulnibactin_utilization_protein_viuB_[Acinetobactin_(CVF768)]_[Acinetobacter_baumannii_AB307-0294]	Acinetobacter_baumannii_AB307-0294]	bauF	0	0	2	0	0	0	0	0	0	0	0	0	0	0	0	0	0	0	0	0	0	0	0	0	0	0	0	0	0	0	0	0	0	0	0	0	0	0	0	0	0	0	0	0	0	0	0
VFG038076(gi:215485092)_(ABBFA_003461)_Tyrosine-protein_kinase_ptk_[Capsule_(CVF775)]_[Acinetobacter_baumannii_AB307-0294]	Acinetobacter_baumannii_AB307-0294]	ABBFA_003461	0	0	2	0	0	0	0	0	0	0	0	0	0	0	0	0	0	0	0	0	0	0	0	0	0	0	0	0	0	0	0	0	0	0	0	0	0	0	0	0	0	0	0	0	0	0	0
VFG037971(gi:215485085)_(ABBFA_003454)_hypothetical_protein_[Capsule_(CVF775)]_[Acinetobacter_baumannii_AB307-0294]	Acinetobacter_baumannii_AB307-0294]	ABBFA_003454	0	0	2	0	0	0	0	0	0	0	0	0	0	0	0	0	0	0	0	0	0	0	0	0	0	0	0	0	0	0	0	0	0	0	0	0	0	0	0	0	0	0	0	0	0	0	0
VFG037911(gi:215485081)_(ABBFA_003450)_epimerase/dehydratase_WbiI_[Capsule_(CVF775)]_[Acinetobacter_baumannii_AB307-0294]	Acinetobacter_baumannii_AB307-0294]	ABBFA_003450	0	0	2	0	0	0	0	0	0	0	0	0	0	0	0	0	0	0	0	0	0	0	0	0	0	0	0	0	0	0	0	0	0	0	0	0	0	0	0	0	0	0	0	0	0	0	0
VFG037941(gi:215485083)_(ABBFA_003452)_transferase_[Capsule_(CVF775)]_[Acinetobacter_baumannii_AB307-0294]	Acinetobacter_baumannii_AB307-0294]	ABBFA_003452	0	0	2	0	0	0	0	0	0	0	0	0	0	0	0	0	0	0	0	0	0	0	0	0	0	0	0	0	0	0	0	0	0	0	0	0	0	0	0	0	0	0	0	0	0	0	0
VFG038001(gi:215485087)_(ABBFA_003456)_Capsular_polysaccharide_biosynthesis_protein_capF_[Capsule_(CVF775)]_[Acinetobacter_baumannii_AB307-0294]	Acinetobacter_baumannii_AB307-0294]	ABBFA_003456	0	0	2	0	0	0	0	0	0	0	0	0	0	0	0	0	0	0	0	0	0	0	0	0	0	0	0	0	0	0	0	0	0	0	0	0	0	0	0	0	0	0	0	0	0	0	0
VFG037427(gi:217322880)_(basB)_actinomycin_synthetase_II_[Acinetobactin_(CVF768)]_[Acinetobacter_baumannii_AB307-0294]	Acinetobacter_baumannii_AB307-0294]	basB	0	0	2	0	0	0	0	0	0	0	0	0	0	0	0	0	0	0	0	0	0	0	0	0	0	0	0	0	0	0	0	0	0	0	0	0	0	0	0	0	0	0	0	0	0	0	0
VFG037546(gi:215484360)_(ABBFA_002691)_hypothetical_protein_[Heme_utilization__(CVF769)]_[Acinetobacter_baumannii_AB307-0294]	Acinetobacter_baumannii_AB307-0294]	ABBFA_002691	0	0	2	0	0	0	0	0	0	0	0	0	0	0	0	0	0	0	0	0	0	0	0	0	0	0	0	0	0	0	0	0	0	0	0	0	0	0	0	0	0	0	0	0	0	0	0
VFG037881(gi:215485079)_(ABBFA_003448)_UDP-glucose_6-dehydrogenase_[Capsule_(CVF775)]_[Acinetobacter_baumannii_AB307-0294]	Acinetobacter_baumannii_AB307-0294]	ABBFA_003448	0	0	2	0	0	0	0	0	0	0	0	0	0	0	0	0	0	0	0	0	0	0	0	0	0	0	0	0	0	0	0	0	0	0	0	0	0	0	0	0	0	0	0	0	0	0	0
VFG037469(gi:215484361)_(ABBFA_002692)_HTH-type_transcriptional_regulator_cynR_(Cyn_operon_transcriptionalactivator)_[Heme_utilization__(CVF769)]_[Acinetobacter_baumannii_AB307-0294]	Acinetobacter_baumannii_AB307-0294]	ABBFA_002692	0	0	2	0	0	0	0	0	0	0	0	0	0	0	0	0	0	0	0	0	0	0	0	0	0	0	0	0	0	0	0	0	0	0	0	0	0	0	0	0	0	0	0	0	0	0	0
VFG037821(gi:215481910)_(lpxC)_UDP-3-O-[3-hydroxymyristoyl]_N-acetylglucosamine_deacetylase_[LPS_(CVF774)]_[Acinetobacter_baumannii_AB307-0294]	Acinetobacter_baumannii_AB307-0294]	lpxC	0	0	2	0	0	0	0	0	0	0	0	0	0	0	0	0	0	0	0	0	0	0	0	0	0	0	0	0	0	0	0	0	0	0	0	0	0	0	0	0	0	0	0	0	0	0	0
VFG037896(gi:215485080)_(galU)_UTP-glucose-1-phosphate_uridylyltransferase_[Capsule_(CVF775)]_[Acinetobacter_baumannii_AB307-0294]	Acinetobacter_baumannii_AB307-0294]	galU	0	0	2	0	0	0	0	0	0	0	0	0	0	0	0	0	0	0	0	0	0	0	0	0	0	0	0	0	0	0	0	0	0	0	0	0	0	0	0	0	0	0	0	0	0	0	0
VFG037231(gi:215482779)_(basI)_hypothetical_protein_[Acinetobactin_(CVF768)]_[Acinetobacter_baumannii_AB307-0294]	Acinetobacter_baumannii_AB307-0294]	basI	0	0	2	0	0	0	0	0	0	0	0	0	0	0	0	0	0	0	0	0	0	0	0	0	0	0	0	0	0	0	0	0	0	0	0	0	0	0	0	0	0	0	0	0	0	0	0
VFG037720(gb|YP_001847164)_(adeG)_cation/multidrug_efflux_pump_[AdeFGH_efflux_pump_(VF0504)]_[Acinetobacter_baumannii_ACICU]	Acinetobacter_baumannii_ACICU]	adeG	1	0	2	0	0	0	0	0	0	0	0	0	0	0	0	0	0	0	0	0	0	0	0	0	0	0	0	0	0	0	0	0	0	0	0	0	0	0	0	0	0	0	0	0	0	0	0
VFG037456(gb|YP_001847248)_(bauF)_siderophore-interacting_protein_[Acinetobactin_(VF0467)]_[Acinetobacter_baumannii_ACICU]	Acinetobacter_baumannii_ACICU]	bauF	0	0	2	0	0	0	0	0	0	0	0	0	0	0	0	0	0	0	0	0	0	0	0	0	0	0	0	0	0	0	0	0	0	0	0	0	0	0	0	0	0	0	0	0	0	0	0
VFG037316(gb|YP_001847237)_(entE)_non-ribosomal_peptide_synthetase_adenylate-forming_enzyme_of_acinetobactin_synthesis_[Acinetobactin_(VF0467)]_[Acinetobacter_baumannii_ACICU]	Acinetobacter_baumannii_ACICU]	entE	0	0	2	0	0	0	0	0	0	0	0	0	0	0	0	0	0	0	0	0	0	0	0	0	0	0	0	0	0	0	0	0	0	0	0	0	0	0	0	0	0	0	0	0	0	0	0
VFG037302(gb|YP_001847236)_(basF)_aryl_carrier_protein_BasF_[Acinetobactin_(VF0467)]_[Acinetobacter_baumannii_ACICU]	Acinetobacter_baumannii_ACICU]	basF	0	0	2	0	0	0	0	0	0	0	0	0	0	0	0	0	0	0	0	0	0	0	0	0	0	0	0	0	0	0	0	0	0	0	0	0	0	0	0	0	0	0	0	0	0	0	0
VFG037625(gb|YP_001847073)_(csuE)_Csu_pilus_tip_adhesin_CsuE_[Csu_fimbriae_(VF0461)]_[Acinetobacter_baumannii_ACICU]	Acinetobacter_baumannii_ACICU]	csuE	0	0	2	0	0	0	0	0	0	0	0	0	0	0	0	0	0	0	0	0	0	0	0	0	0	0	0	0	0	0	0	0	0	0	0	0	0	0	0	0	0	0	0	0	0	0	0
VFG037372(gb|YP_001847241)_(bauB)_ferric_siderophore_ABC_transporter,_periplasmic_siderophore-binding_protein_[Acinetobactin_(VF0467)]_[Acinetobacter_baumannii_ACICU]	Acinetobacter_baumannii_ACICU]	bauB	0	0	2	0	0	0	0	0	0	0	0	0	0	0	0	0	0	0	0	0	0	0	0	0	0	0	0	0	0	0	0	0	0	0	0	0	0	0	0	0	0	0	0	0	0	0	0
VFG038119(gi:184156409)_(ACICU_00089)_UDP-glucose_6-dehydrogenase_[Capsule_(VF0465)]_[Acinetobacter_baumannii_ACICU]	Acinetobacter_baumannii_ACICU]	ACICU_00089	0	0	2	0	0	0	0	0	0	0	0	0	0	0	0	0	0	0	0	0	0	0	0	0	0	0	0	0	0	0	0	0	0	0	0	0	0	0	0	0	0	0	0	0	0	0	0
VFG037882(gi:184156393)_(ACICU_00073)_periplasmic_protein_[Capsule_(VF0465)]_[Acinetobacter_baumannii_ACICU]	Acinetobacter_baumannii_ACICU]	ACICU_00073	0	0	2	0	0	0	0	0	0	0	0	0	0	0	0	0	0	0	0	0	0	0	0	0	0	0	0	0	0	0	0	0	0	0	0	0	0	0	0	0	0	0	0	0	0	0	0
VFG038047(gi:184156404)_(ACICU_00084)_hypothetical_protein_[Capsule_(VF0465)]_[Acinetobacter_baumannii_ACICU]	Acinetobacter_baumannii_ACICU]	ACICU_00084	0	0	2	0	0	0	0	0	0	0	0	0	0	0	0	0	0	0	0	0	0	0	0	0	0	0	0	0	0	0	0	0	0	0	0	0	0	0	0	0	0	0	0	0	0	0	0
VFG038234(gb|YP_001845365)_(bfmS)_signal_transduction_histidine_kinase_[BfmRS_(VF0463)]_[Acinetobacter_baumannii_ACICU]	Acinetobacter_baumannii_ACICU]	bfmS	0	0	2	0	0	0	0	0	0	0	0	0	0	0	0	0	0	0	0	0	0	0	0	0	0	0	0	0	0	0	0	0	0	0	0	0	0	0	0	0	0	0	0	0	0	0	0
VFG037638(gb|YP_001847597)_(bap)_biofilm-associated_protein_[Bap_(VF0462)]_[Acinetobacter_baumannii_ACICU]	Acinetobacter_baumannii_ACICU]	bap	0	0	2	0	0	0	0	0	0	0	0	0	0	0	0	0	0	0	0	0	0	0	0	0	0	0	0	0	0	0	0	0	0	0	0	0	0	0	0	0	0	0	0	0	0	0	0
VFG037288(gb|YP_001847235)_(basG)_acinetobactin_biosynthesis_protein_BasF_[Acinetobactin_(VF0467)]_[Acinetobacter_baumannii_ACICU]	Acinetobacter_baumannii_ACICU]	basG	0	0	2	0	0	0	0	0	0	0	0	0	0	0	0	0	0	0	0	0	0	0	0	0	0	0	0	0	0	0	0	0	0	0	0	0	0	0	0	0	0	0	0	0	0	0	0
VFG037246(gb|YP_001847231)_(basH)_non-ribosomal_peptide_biosynthesis_thioesterase_BasH_[Acinetobactin_(VF0467)]_[Acinetobacter_baumannii_ACICU]	Acinetobacter_baumannii_ACICU]	basH	0	0	2	0	0	0	0	0	0	0	0	0	0	0	0	0	0	0	0	0	0	0	0	0	0	0	0	0	0	0	0	0	0	0	0	0	0	0	0	0	0	0	0	0	0	0	0
VFG037987(gi:184156400)_(ACICU_00080)_sialic_acid_synthase_[Capsule_(VF0465)]_[Acinetobacter_baumannii_ACICU]	Acinetobacter_baumannii_ACICU]	ACICU_00080	0	0	2	0	0	0	0	0	0	0	0	0	0	0	0	0	0	0	0	0	0	0	0	0	0	0	0	0	0	0	0	0	0	0	0	0	0	0	0	0	0	0	0	0	0	0	0
VFG037852(gi:184156391)_(ACICU_00071)_ATPase_[Capsule_(VF0465)]_[Acinetobacter_baumannii_ACICU]	Acinetobacter_baumannii_ACICU]	ACICU_00071	0	0	2	0	0	0	0	0	0	0	0	0	0	0	0	0	0	0	0	0	0	0	0	0	0	0	0	0	0	0	0	0	0	0	0	0	0	0	0	0	0	0	0	0	0	0	0
VFG037203(gb|YP_001847849)_(plcD)_phosphatidylserine/phosphatidylglycerophosphate/cardiolipin_synthase_[Phospholipase_D_(VF0469)]_[Acinetobacter_baumannii_ACICU]	Acinetobacter_baumannii_ACICU]	plcD	0	0	2	0	0	0	0	0	0	0	0	0	0	0	0	0	0	0	0	0	0	0	0	0	0	0	0	0	0	0	0	0	0	0	0	0	0	0	0	0	0	0	0	0	0	0	0
VFG037400(gb|YP_001847243)_(bauC)_ferric_siderophore_ABC_transporter,_permease_protein_BauC_[Acinetobactin_(VF0467)]_[Acinetobacter_baumannii_ACICU]	Acinetobacter_baumannii_ACICU]	bauC	0	0	2	0	0	0	0	0	0	0	0	0	0	0	0	0	0	0	0	0	0	0	0	0	0	0	0	0	0	0	0	0	0	0	0	0	0	0	0	0	0	0	0	0	0	0	0
VFG037386(gb|YP_001847242)_(bauE)_ferric_siderophore_ABC_transporter,_ATP-binding_protein_BauE_[Acinetobactin_(VF0467)]_[Acinetobacter_baumannii_ACICU]	Acinetobacter_baumannii_ACICU]	bauE	0	0	2	0	0	0	0	0	0	0	0	0	0	0	0	0	0	0	0	0	0	0	0	0	0	0	0	0	0	0	0	0	0	0	0	0	0	0	0	0	0	0	0	0	0	0	0
VFG037521(gi:184157198)_(ACICU_00878)_putative_TonB-related_protein_[Heme_utilization__(CVF769)]_[Acinetobacter_baumannii_ACICU]	Acinetobacter_baumannii_ACICU]	ACICU_00878	0	0	2	0	0	0	0	0	0	0	0	0	0	0	0	0	0	0	0	0	0	0	0	0	0	0	0	0	0	0	0	0	0	0	0	0	0	0	0	0	0	0	0	0	0	0	0
VFG038132(gi:184156410)_(pgi)_glucose-6-phosphate_isomerase_[Capsule_(VF0465)]_[Acinetobacter_baumannii_ACICU]	Acinetobacter_baumannii_ACICU]	pgi	0	0	2	0	0	0	0	0	0	0	0	0	0	0	0	0	0	0	0	0	0	0	0	0	0	0	0	0	0	0	0	0	0	0	0	0	0	0	0	0	0	0	0	0	0	0	0
VFG037176(gb|YP_001844723)_(plc)_phospholipase_C_[Phospholipase_C_(VF0470)]_[Acinetobacter_baumannii_ACICU]	Acinetobacter_baumannii_ACICU]	plc	0	0	2	0	0	0	0	0	0	0	0	0	0	0	0	0	0	0	0	0	0	0	0	0	0	0	0	0	0	0	0	0	0	0	0	0	0	0	0	0	0	0	0	0	0	0	0
VFG037735(gb|YP_001847165)_(adeH)_outer_membrane_protein_[AdeFGH_efflux_pump_(VF0504)]_[Acinetobacter_baumannii_ACICU]	Acinetobacter_baumannii_ACICU]	adeH	0	0	2	0	0	0	0	0	0	0	0	0	0	0	0	0	0	0	0	0	0	0	0	0	0	0	0	0	0	0	0	0	0	0	0	0	0	0	0	0	0	0	0	0	0	0	0
VFG037442(gb|YP_001847247)_(basA)_acinetobactin_biosynthesis_protein_[Acinetobactin_(VF0467)]_[Acinetobacter_baumannii_ACICU]	Acinetobacter_baumannii_ACICU]	basA	0	0	2	0	0	0	0	0	0	0	0	0	0	0	0	0	0	0	0	0	0	0	0	0	0	0	0	0	0	0	0	0	0	0	0	0	0	0	0	0	0	0	0	0	0	0	0
VFG037867(gi:184156392)_(ACICU_00072)_protein-tyrosine-phosphatase_[Capsule_(VF0465)]_[Acinetobacter_baumannii_ACICU]	Acinetobacter_baumannii_ACICU]	ACICU_00072	0	0	2	0	0	0	0	0	0	0	0	0	0	0	0	0	0	0	0	0	0	0	0	0	0	0	0	0	0	0	0	0	0	0	0	0	0	0	0	0	0	0	0	0	0	0	0
VFG037664(gb|YP_001847022)_(pgaB)_poly-beta-1,6-N-acetyl-D-glucosamine_N-deacetylase_PgaB_[PNAG_(VF0472)]_[Acinetobacter_baumannii_ACICU]	Acinetobacter_baumannii_ACICU]	pgaB	0	0	2	0	0	0	0	0	0	0	0	0	0	0	0	0	0	0	0	0	0	0	0	0	0	0	0	0	0	0	0	0	0	0	0	0	0	0	0	0	0	0	0	0	0	0	0
VFG037358(gb|YP_001847240)_(bauA)_TonB-dependent_siderophore_receptor_BauA_[Acinetobactin_(VF0467)]_[Acinetobacter_baumannii_ACICU]	Acinetobacter_baumannii_ACICU]	bauA	0	0	2	0	0	0	0	0	0	0	0	0	0	0	0	0	0	0	0	0	0	0	0	0	0	0	0	0	0	0	0	0	0	0	0	0	0	0	0	0	0	0	0	0	0	0	0
VFG038155(gi:184156412)_(ACICU_00092)_phosphomannomutase_[Capsule_(VF0465)]_[Acinetobacter_baumannii_ACICU]	Acinetobacter_baumannii_ACICU]	ACICU_00092	0	0	2	0	0	0	0	0	0	0	0	0	0	0	0	0	0	0	0	0	0	0	0	0	0	0	0	0	0	0	0	0	0	0	0	0	0	0	0	0	0	0	0	0	0	0	0
VFG037260(gb|YP_001847232)_(barB)_siderophore_efflux_system_of_the_ABC_superfamily_[Acinetobactin_(VF0467)]_[Acinetobacter_baumannii_ACICU]	Acinetobacter_baumannii_ACICU]	barB	0	0	2	0	0	0	0	0	0	0	0	0	0	0	0	0	0	0	0	0	0	0	0	0	0	0	0	0	0	0	0	0	0	0	0	0	0	0	0	0	0	0	0	0	0	0	0
VFG037470(gi:184157192)_(ACICU_00872)_transcriptional_regulator_[Heme_utilization__(CVF769)]_[Acinetobacter_baumannii_ACICU]	Acinetobacter_baumannii_ACICU]	ACICU_00872	0	0	2	0	0	0	0	0	0	0	0	0	0	0	0	0	0	0	0	0	0	0	0	0	0	0	0	0	0	0	0	0	0	0	0	0	0	0	0	0	0	0	0	0	0	0	0
VFG037490(gi:184157194)_(ACICU_00874)_Fe2+-dicitrate_sensor,_membrane_component_[Heme_utilization__(CVF769)]_[Acinetobacter_baumannii_ACICU]	Acinetobacter_baumannii_ACICU]	ACICU_00874	0	0	2	0	0	0	0	0	0	0	0	0	0	0	0	0	0	0	0	0	0	0	0	0	0	0	0	0	0	0	0	0	0	0	0	0	0	0	0	0	0	0	0	0	0	0	0
VFG037747(gi:184159173)_(lpxM)_lauroyl/myristoyl_acyltransferase_[LPS_(VF0466)]_[Acinetobacter_baumannii_ACICU]	Acinetobacter_baumannii_ACICU]	lpxM	0	0	2	0	0	0	0	0	0	0	0	0	0	0	0	0	0	0	0	0	0	0	0	0	0	0	0	0	0	0	0	0	0	0	0	0	0	0	0	0	0	0	0	0	0	0	0
VFG038017(gi:184156402)_(ACICU_00082)_hypothetical_protein_[Capsule_(VF0465)]_[Acinetobacter_baumannii_ACICU]	Acinetobacter_baumannii_ACICU]	ACICU_00082	0	0	2	0	0	0	0	0	0	0	0	0	0	0	0	0	0	0	0	0	0	0	0	0	0	0	0	0	0	0	0	0	0	0	0	0	0	0	0	0	0	0	0	0	0	0	0
VFG037912(gi:184156395)_(ACICU_00075)_nucleoside-diphosphate_sugar_epimerase_[Capsule_(VF0465)]_[Acinetobacter_baumannii_ACICU]	Acinetobacter_baumannii_ACICU]	ACICU_00075	0	0	2	0	0	0	0	0	0	0	0	0	0	0	0	0	0	0	0	0	0	0	0	0	0	0	0	0	0	0	0	0	0	0	0	0	0	0	0	0	0	0	0	0	0	0	0
VFG038249(gi:184156580)_(pbpG)_D-alanyl-D-alanine_carboxypeptidase_[PbpG_(VF0468)]_[Acinetobacter_baumannii_ACICU]	Acinetobacter_baumannii_ACICU]	pbpG	0	0	2	0	0	0	0	0	0	0	0	0	0	0	0	0	0	0	0	0	0	0	0	0	0	0	0	0	0	0	0	0	0	0	0	0	0	0	0	0	0	0	0	0	0	0	0
VFG037218(gb|YP_001847229)_(basJ)_acinetobactin_biosynthesis_protein_BasJ_[Acinetobactin_(VF0467)]_[Acinetobacter_baumannii_ACICU]	Acinetobacter_baumannii_ACICU]	basJ	0	0	2	0	0	0	0	0	0	0	0	0	0	0	0	0	0	0	0	0	0	0	0	0	0	0	0	0	0	0	0	0	0	0	0	0	0	0	0	0	0	0	0	0	0	0	0
VFG037497(gi:184157195)_(ACICU_00875)_outer_membrane_receptor_[Heme_utilization__(CVF769)]_[Acinetobacter_baumannii_ACICU]	Acinetobacter_baumannii_ACICU]	ACICU_00875	0	0	2	0	0	0	0	0	0	0	0	0	0	0	0	0	0	0	0	0	0	0	0	0	0	0	0	0	0	0	0	0	0	0	0	0	0	0	0	0	0	0	0	0	0	0	0
VFG037612(gb|YP_001847074)_(csuD)_Csu_pilus_usher_protein_CsuD_[Csu_fimbriae_(VF0461)]_[Acinetobacter_baumannii_ACICU]	Acinetobacter_baumannii_ACICU]	csuD	0	0	2	0	0	0	0	0	0	0	0	0	0	0	0	0	0	0	0	0	0	0	0	0	0	0	0	0	0	0	0	0	0	0	0	0	0	0	0	0	0	0	0	0	0	0	0
VFG037650(gb|YP_001847024)_(pgaA)_poly-beta-1,6_N-acetyl-D-glucosamine_export_porin_PgaA_[PNAG_(VF0472)]_[Acinetobacter_baumannii_ACICU]	Acinetobacter_baumannii_ACICU]	pgaA	0	0	2	0	0	0	0	0	0	0	0	0	0	0	0	0	0	0	0	0	0	0	0	0	0	0	0	0	0	0	0	0	0	0	0	0	0	0	0	0	0	0	0	0	0	0	0
VFG037274(gb|YP_001847233)_(barA)_siderophore_efflux_system_of_the_ABC_superfamily_[Acinetobactin_(VF0467)]_[Acinetobacter_baumannii_ACICU]	Acinetobacter_baumannii_ACICU]	barA	0	0	2	0	0	0	0	0	0	0	0	0	0	0	0	0	0	0	0	0	0	0	0	0	0	0	0	0	0	0	0	0	0	0	0	0	0	0	0	0	0	0	0	0	0	0	0
VFG038105(gi:184156408)_(ACICU_00088)_UDP-glucose_pyrophosphorylase_[Capsule_(VF0465)]_[Acinetobacter_baumannii_ACICU]	Acinetobacter_baumannii_ACICU]	ACICU_00088	0	0	2	0	0	0	0	0	0	0	0	0	0	0	0	0	0	0	0	0	0	0	0	0	0	0	0	0	0	0	0	0	0	0	0	0	0	0	0	0	0	0	0	0	0	0	0
VFG037330(gb|YP_001847238)_(basD)_acinetobactin_biosynthesis_protein_BasD_[Acinetobactin_(VF0467)]_[Acinetobacter_baumannii_ACICU]	Acinetobacter_baumannii_ACICU]	basD	0	0	2	0	0	0	0	0	0	0	0	0	0	0	0	0	0	0	0	0	0	0	0	0	0	0	0	0	0	0	0	0	0	0	0	0	0	0	0	0	0	0	0	0	0	0	0
VFG038002(gi:184156401)_(ACICU_00081)_membrane_protein_[Capsule_(VF0465)]_[Acinetobacter_baumannii_ACICU]	Acinetobacter_baumannii_ACICU]	ACICU_00081	0	0	2	0	0	0	0	0	0	0	0	0	0	0	0	0	0	0	0	0	0	0	0	0	0	0	0	0	0	0	0	0	0	0	0	0	0	0	0	0	0	0	0	0	0	0	0
VFG037428(gb|YP_001847246)_(basB)_non-ribosomal_peptide_synthetase_with_condensation_and_peptidyl_carrier_protein_domains_[Acinetobactin_(VF0467)]_[Acinetobacter_baumannii_ACICU]	Acinetobacter_baumannii_ACICU]	basB	0	0	2	0	0	0	0	0	0	0	0	0	0	0	0	0	0	0	0	0	0	0	0	0	0	0	0	0	0	0	0	0	0	0	0	0	0	0	0	0	0	0	0	0	0	0	0
VFG038077(gi:184156406)_(ACICU_00086)_glycosyltransferase_[Capsule_(VF0465)]_[Acinetobacter_baumannii_ACICU]	Acinetobacter_baumannii_ACICU]	ACICU_00086	0	0	2	0	0	0	0	0	0	0	0	0	0	0	0	0	0	0	0	0	0	0	0	0	0	0	0	0	0	0	0	0	0	0	0	0	0	0	0	0	0	0	0	0	0	0	0
VFG037897(gi:184156394)_(ACICU_00074)_UDP-N-acetyl-D-mannosaminuronate_dehydrogenase_[Capsule_(VF0465)]_[Acinetobacter_baumannii_ACICU]	Acinetobacter_baumannii_ACICU]	ACICU_00074	0	0	2	0	0	0	0	0	0	0	0	0	0	0	0	0	0	0	0	0	0	0	0	0	0	0	0	0	0	0	0	0	0	0	0	0	0	0	0	0	0	0	0	0	0	0	0
VFG037957(gi:184156398)_(ACICU_00078)_spore_coat_polysaccharide_biosynthesis_protein,_glycosyltransferase_[Capsule_(VF0465)]_[Acinetobacter_baumannii_ACICU]	Acinetobacter_baumannii_ACICU]	ACICU_00078	0	0	2	0	0	0	0	0	0	0	0	0	0	0	0	0	0	0	0	0	0	0	0	0	0	0	0	0	0	0	0	0	0	0	0	0	0	0	0	0	0	0	0	0	0	0	0
VFG037972(gi:184156399)_(ACICU_00079)_acetyltransferase_[Capsule_(VF0465)]_[Acinetobacter_baumannii_ACICU]	Acinetobacter_baumannii_ACICU]	ACICU_00079	0	0	2	0	0	0	0	0	0	0	0	0	0	0	0	0	0	0	0	0	0	0	0	0	0	0	0	0	0	0	0	0	0	0	0	0	0	0	0	0	0	0	0	0	0	0	0
VFG037513(gi:184157197)_(ACICU_00877)_hypothetical_protein_[Heme_utilization__(CVF769)]_[Acinetobacter_baumannii_ACICU]	Acinetobacter_baumannii_ACICU]	ACICU_00877	0	0	2	0	0	0	0	0	0	0	0	0	0	0	0	0	0	0	0	0	0	0	0	0	0	0	0	0	0	0	0	0	0	0	0	0	0	0	0	0	0	0	0	0	0	0	0
VFG037927(gi:184156396)_(ACICU_00076)_pyridoxal_phosphate-dependent_enzyme_[Capsule_(VF0465)]_[Acinetobacter_baumannii_ACICU]	Acinetobacter_baumannii_ACICU]	ACICU_00076	0	0	2	0	0	0	0	0	0	0	0	0	0	0	0	0	0	0	0	0	0	0	0	0	0	0	0	0	0	0	0	0	0	0	0	0	0	0	0	0	0	0	0	0	0	0	0
VFG038062(gi:184156405)_(ACICU_00085)_hypothetical_protein_[Capsule_(VF0465)]_[Acinetobacter_baumannii_ACICU]	Acinetobacter_baumannii_ACICU]	ACICU_00085	0	0	2	0	0	0	0	0	0	0	0	0	0	0	0	0	0	0	0	0	0	0	0	0	0	0	0	0	0	0	0	0	0	0	0	0	0	0	0	0	0	0	0	0	0	0	0
VFG037678(gb|YP_001847021)_(pgaC)_poly-beta-1,6_N-acetyl-D-glucosamine_synthase_[PNAG_(VF0472)]_[Acinetobacter_baumannii_ACICU]	Acinetobacter_baumannii_ACICU]	pgaC	0	0	2	0	0	0	0	0	0	0	0	0	0	0	0	0	0	0	0	0	0	0	0	0	0	0	0	0	0	0	0	0	0	0	0	0	0	0	0	0	0	0	0	0	0	0	0
VFG037177(gb|YP_001846906)_(plc)_phospholipase_C_[Phospholipase_C_(VF0470)]_[Acinetobacter_baumannii_ACICU]	Acinetobacter_baumannii_ACICU]	plc	0	0	2	0	0	0	0	0	0	0	0	0	0	0	0	0	0	0	0	0	0	0	0	0	0	0	0	0	0	0	0	0	0	0	0	0	0	0	0	0	0	0	0	0	0	0	0
VFG037529(gi:184157199)_(hemO)_Heme_oxygenase_[Heme_utilization__(CVF769)]_[Acinetobacter_baumannii_ACICU]	Acinetobacter_baumannii_ACICU]	hemO	0	0	2	0	0	0	0	0	0	0	0	0	0	0	0	0	0	0	0	0	0	0	0	0	0	0	0	0	0	0	0	0	0	0	0	0	0	0	0	0	0	0	0	0	0	0	0
VFG037414(gb|YP_001847244)_(bauD)_ferric_siderophore_ABC_transporter,_permease_protein_BauD_[Acinetobactin_(VF0467)]_[Acinetobacter_baumannii_ACICU]	Acinetobacter_baumannii_ACICU]	bauD	0	0	2	0	0	0	0	0	0	0	0	0	0	0	0	0	0	0	0	0	0	0	0	0	0	0	0	0	0	0	0	0	0	0	0	0	0	0	0	0	0	0	0	0	0	0	0
VFG037586(gb|YP_001847076)_(csuB)_Csu_pilus_subunit_CsuB_[Csu_fimbriae_(VF0461)]_[Acinetobacter_baumannii_ACICU]	Acinetobacter_baumannii_ACICU]	csuB	0	0	2	0	0	0	0	0	0	0	0	0	0	0	0	0	0	0	0	0	0	0	0	0	0	0	0	0	0	0	0	0	0	0	0	0	0	0	0	0	0	0	0	0	0	0	0
VFG037505(gi:184157196)_(ACICU_00876)_hypothetical_protein_[Heme_utilization__(CVF769)]_[Acinetobacter_baumannii_ACICU]	Acinetobacter_baumannii_ACICU]	ACICU_00876	0	0	2	0	0	0	0	0	0	0	0	0	0	0	0	0	0	0	0	0	0	0	0	0	0	0	0	0	0	0	0	0	0	0	0	0	0	0	0	0	0	0	0	0	0	0	0
VFG037705(gb|YP_001847163)_(adeF)_membrane-fusion_protein_[AdeFGH_efflux_pump_(VF0504)]_[Acinetobacter_baumannii_ACICU]	Acinetobacter_baumannii_ACICU]	adeF	0	0	2	0	0	0	0	0	0	0	0	0	0	0	0	0	0	0	0	0	0	0	0	0	0	0	0	0	0	0	0	0	0	0	0	0	0	0	0	0	0	0	0	0	0	0	0
VFG037942(gi:184156397)_(ACICU_00077)_CMP-N-acetylneuraminic_acid_synthetase_[Capsule_(VF0465)]_[Acinetobacter_baumannii_ACICU]	Acinetobacter_baumannii_ACICU]	ACICU_00077	0	0	2	0	0	0	0	0	0	0	0	0	0	0	0	0	0	0	0	0	0	0	0	0	0	0	0	0	0	0	0	0	0	0	0	0	0	0	0	0	0	0	0	0	0	0	0
VFG037232(gb|YP_001847230)_(basI)_phosphopantetheinyl_transferase_component_of_acinetobactin_biosynthesis_protein_BasI_[Acinetobactin_(VF0467)]_[Acinetobacter_baumannii_ACICU]	Acinetobacter_baumannii_ACICU]	basI	0	0	2	0	0	0	0	0	0	0	0	0	0	0	0	0	0	0	0	0	0	0	0	0	0	0	0	0	0	0	0	0	0	0	0	0	0	0	0	0	0	0	0	0	0	0	0
VFG037344(gb|YP_001847239)_(basC)_acinetobactin_biosynthesis_protein_BasC_[Acinetobactin_(VF0467)]_[Acinetobacter_baumannii_ACICU]	Acinetobacter_baumannii_ACICU]	basC	0	0	2	0	0	0	0	0	0	0	0	0	0	0	0	0	0	0	0	0	0	0	0	0	0	0	0	0	0	0	0	0	0	0	0	0	0	0	0	0	0	0	0	0	0	0	0
VFG038205(gb|YP_001844797)_(abaR)_DNA-binding_HTH_domain-containing_protein_[Quorom_sensing_(VF0471)]_[Acinetobacter_baumannii_ACICU]	Acinetobacter_baumannii_ACICU]	abaR	0	0	2	0	0	0	0	0	0	0	0	0	0	0	0	0	0	0	0	0	0	0	0	0	0	0	0	0	0	0	0	0	0	0	0	0	0	0	0	0	0	0	0	0	0	0	0
VFG037560(gb|YP_001847079)_(csuA/B)_Csu_pilus_major_pilin_subunit_CsuA/B_[Csu_fimbriae_(VF0461)]_[Acinetobacter_baumannii_ACICU]	Acinetobacter_baumannii_ACICU]	csuA/B	0	0	2	0	0	0	0	0	0	0	0	0	0	0	0	0	0	0	0	0	0	0	0	0	0	0	0	0	0	0	0	0	0	0	0	0	0	0	0	0	0	0	0	0	0	0	0
VFG038144(gi:184156411)_(ACICU_00091)_UDP-glucose_4-epimerase_[Capsule_(VF0465)]_[Acinetobacter_baumannii_ACICU]	Acinetobacter_baumannii_ACICU]	ACICU_00091	0	0	2	0	0	0	0	0	0	0	0	0	0	0	0	0	0	0	0	0	0	0	0	0	0	0	0	0	0	0	0	0	0	0	0	0	0	0	0	0	0	0	0	0	0	0	0
VFG037547(gi:184157201)_(ACICU_00881)_hypothetical_protein_[Heme_utilization__(CVF769)]_[Acinetobacter_baumannii_ACICU]	Acinetobacter_baumannii_ACICU]	ACICU_00881	0	0	2	0	0	0	0	0	0	0	0	0	0	0	0	0	0	0	0	0	0	0	0	0	0	0	0	0	0	0	0	0	0	0	0	0	0	0	0	0	0	0	0	0	0	0	0
VFG037599(gb|YP_001847075)_(csuC)_Csu_pilus_chaperone_protein_CsuC__[Csu_fimbriae_(VF0461)]_[Acinetobacter_baumannii_ACICU]	Acinetobacter_baumannii_ACICU]	csuC	0	0	2	0	0	0	0	0	0	0	0	0	0	0	0	0	0	0	0	0	0	0	0	0	0	0	0	0	0	0	0	0	0	0	0	0	0	0	0	0	0	0	0	0	0	0	0
VFG038219(gb|YP_001845364)_(bfmR)_biofilm-controlling_response_regulator_[BfmRS_(VF0463)]_[Acinetobacter_baumannii_ACICU]	Acinetobacter_baumannii_ACICU]	bfmR	0	0	2	0	0	0	0	0	0	0	0	0	0	0	0	0	0	0	0	0	0	0	0	0	0	0	0	0	0	0	0	0	0	0	0	0	0	0	0	0	0	0	0	0	0	0	0
VFG038032(gi:184156403)_(ACICU_00083)_hypothetical_protein_[Capsule_(VF0465)]_[Acinetobacter_baumannii_ACICU]	Acinetobacter_baumannii_ACICU]	ACICU_00083	0	0	2	0	0	0	0	0	0	0	0	0	0	0	0	0	0	0	0	0	0	0	0	0	0	0	0	0	0	0	0	0	0	0	0	0	0	0	0	0	0	0	0	0	0	0	0
VFG037482(gi:184157193)_(ACICU_00873)_DNA-directed_RNA_polymerase_specialized_sigma_subunit_[Heme_utilization__(CVF769)]_[Acinetobacter_baumannii_ACICU]	Acinetobacter_baumannii_ACICU]	ACICU_00873	0	0	2	0	0	0	0	0	0	0	0	0	0	0	0	0	0	0	0	0	0	0	0	0	0	0	0	0	0	0	0	0	0	0	0	0	0	0	0	0	0	0	0	0	0	0	0
VFG038176(gb|YP_001847748)_(ompA)_outer_membrane_protein_OmpA_[OmpA_(VF0464)]_[Acinetobacter_baumannii_ACICU]	Acinetobacter_baumannii_ACICU]	ompA	0	0	2	0	0	0	0	0	0	0	0	0	0	0	0	0	0	0	0	0	0	0	0	0	0	0	0	0	0	0	0	0	0	0	0	0	0	0	0	0	0	0	0	0	0	0	0
VFG038091(gi:184156407)_(ACICU_00087)_sugar_transferase_[Capsule_(VF0465)]_[Acinetobacter_baumannii_ACICU]	Acinetobacter_baumannii_ACICU]	ACICU_00087	0	0	2	0	0	0	0	0	0	0	0	0	0	0	0	0	0	0	0	0	0	0	0	0	0	0	0	0	0	0	0	0	0	0	0	0	0	0	0	0	0	0	0	0	0	0	0
VFG037692(gb|YP_001847020)_(pgaD)_poly-beta-1,6-N-acetyl-D-glucosamine_biosynthesis_protein_PgaD_[PNAG_(VF0472)]_[Acinetobacter_baumannii_ACICU]	Acinetobacter_baumannii_ACICU]	pgaD	0	0	2	0	0	0	0	0	0	0	0	0	0	0	0	0	0	0	0	0	0	0	0	0	0	0	0	0	0	0	0	0	0	0	0	0	0	0	0	0	0	0	0	0	0	0	0
VFG037573(gb|YP_001847077)_(csuA)_Csu_pilus_subunit_CsuA_[Csu_fimbriae_(VF0461)]_[Acinetobacter_baumannii_ACICU]	Acinetobacter_baumannii_ACICU]	csuA	0	0	2	0	0	0	0	0	0	0	0	0	0	0	0	0	0	0	0	0	0	0	0	0	0	0	0	0	0	0	0	0	0	0	0	0	0	0	0	0	0	0	0	0	0	0	0
VFG038191(gb|YP_001844795)_(abaI)_N-acyl-L-homoserine_lactone_synthetase_[Quorom_sensing_(VF0471)]_[Acinetobacter_baumannii_ACICU]	Acinetobacter_baumannii_ACICU]	abaI	0	0	2	0	0	0	0	0	0	0	0	0	0	0	0	0	0	0	0	0	0	0	0	0	0	0	0	0	0	0	0	0	0	0	0	0	0	0	0	0	0	0	0	0	0	0	0
VFG037721(gi:126642346)_(adeG)_cation/multidrug_efflux_pump_[AdeFGH_efflux_pump/transport_autoinducer_(CVF773)]_[Acinetobacter_baumannii_ATCC_17978]	Acinetobacter_baumannii_ATCC_17978]	adeG	1	0	2	0	0	0	0	0	0	0	0	0	0	0	0	0	0	0	0	0	0	0	0	0	0	0	0	0	0	0	0	0	0	0	0	0	0	0	0	0	0	0	0	0	0	0	0
VFG037898(gi:126640165)_(A1S_0052)_WecC_protein_[Capsule_(CVF775)]_[Acinetobacter_baumannii_ATCC_17978]	Acinetobacter_baumannii_ATCC_17978]	A1S_0052	1	0	2	0	0	0	0	0	0	0	0	0	0	0	0	0	0	0	0	0	0	0	0	0	0	0	0	0	0	0	0	0	0	0	0	0	0	0	0	0	0	0	0	0	0	0	0
VFG038177(gi:126642864)_(ompA)_outer_membrane_protein_A_[Outer_membrane_protein_(CVF776)]_[Acinetobacter_baumannii_ATCC_17978]	Acinetobacter_baumannii_ATCC_17978]	ompA	0	0	2	0	0	0	0	0	0	0	0	0	0	0	0	0	0	0	0	0	0	0	0	0	0	0	0	0	0	0	0	0	0	0	0	0	0	0	0	0	0	0	0	0	0	0	0
VFG037639(gi:126642727)_(bap)_hypothetical_protein_[Biofilm-associated_protein_(CVF771)]_[Acinetobacter_baumannii_ATCC_17978]	Acinetobacter_baumannii_ATCC_17978]	bap	0	0	2	0	0	0	0	0	0	0	0	0	0	0	0	0	0	0	0	0	0	0	0	0	0	0	0	0	0	0	0	0	0	0	0	0	0	0	0	0	0	0	0	0	0	0	0
VFG037808(gi:126641713)_(lpxB)_lipid-A-disaccharide_synthase_[LPS_(CVF774)]_[Acinetobacter_baumannii_ATCC_17978]	Acinetobacter_baumannii_ATCC_17978]	lpxB	0	0	2	0	0	0	0	0	0	0	0	0	0	0	0	0	0	0	0	0	0	0	0	0	0	0	0	0	0	0	0	0	0	0	0	0	0	0	0	0	0	0	0	0	0	0	0
VFG037883(gi:126640164)_(A1S_0051)_outer_membrane_protein_[Capsule_(CVF775)]_[Acinetobacter_baumannii_ATCC_17978]	Acinetobacter_baumannii_ATCC_17978]	A1S_0051	0	0	2	0	0	0	0	0	0	0	0	0	0	0	0	0	0	0	0	0	0	0	0	0	0	0	0	0	0	0	0	0	0	0	0	0	0	0	0	0	0	0	0	0	0	0	0
VFG037179(gi:126642100)_(plc)_phospholipase_C_[Phospholipase_C_(CVF766)]_[Acinetobacter_baumannii_ATCC_17978]	Acinetobacter_baumannii_ATCC_17978]	plc	0	0	2	0	0	0	0	0	0	0	0	0	0	0	0	0	0	0	0	0	0	0	0	0	0	0	0	0	0	0	0	0	0	0	0	0	0	0	0	0	0	0	0	0	0	0	0
VFG037401(gi:126642425)_(bauC)_ferric_acinetobactin_transport_system_permease_protein_[Acinetobactin_(CVF768)]_[Acinetobacter_baumannii_ATCC_17978]	Acinetobacter_baumannii_ATCC_17978]	bauC	0	0	2	0	0	0	0	0	0	0	0	0	0	0	0	0	0	0	0	0	0	0	0	0	0	0	0	0	0	0	0	0	0	0	0	0	0	0	0	0	0	0	0	0	0	0	0
VFG037853(gi:126640162)_(A1S_0049)_protein_tyrosine_kinase_[Capsule_(CVF775)]_[Acinetobacter_baumannii_ATCC_17978]	Acinetobacter_baumannii_ATCC_17978]	A1S_0049	0	0	2	0	0	0	0	0	0	0	0	0	0	0	0	0	0	0	0	0	0	0	0	0	0	0	0	0	0	0	0	0	0	0	0	0	0	0	0	0	0	0	0	0	0	0	0
VFG037679(gi:126642205)_(pgaC)_hemin_storage_system_HmsR_protein_[PNAG_(Polysaccharide_poly-N-acetylglucosamine)_(CVF772)]_[Acinetobacter_baumannii_ATCC_17978]	Acinetobacter_baumannii_ATCC_17978]	pgaC	0	0	2	0	0	0	0	0	0	0	0	0	0	0	0	0	0	0	0	0	0	0	0	0	0	0	0	0	0	0	0	0	0	0	0	0	0	0	0	0	0	0	0	0	0	0	0
VFG037823(gi:126643337)_(lpxC)_UDP-3-O-[3-hydroxymyristoyl]_N-acetylglucosamine_deacetylase_[LPS_(CVF774)]_[Acinetobacter_baumannii_ATCC_17978]	Acinetobacter_baumannii_ATCC_17978]	lpxC	0	0	2	0	0	0	0	0	0	0	0	0	0	0	0	0	0	0	0	0	0	0	0	0	0	0	0	0	0	0	0	0	0	0	0	0	0	0	0	0	0	0	0	0	0	0	0
VFG037261(gi:126642412)_(barB)_ABC_transporter_[Acinetobactin_(CVF768)]_[Acinetobacter_baumannii_ATCC_17978]	Acinetobacter_baumannii_ATCC_17978]	barB	0	0	2	0	0	0	0	0	0	0	0	0	0	0	0	0	0	0	0	0	0	0	0	0	0	0	0	0	0	0	0	0	0	0	0	0	0	0	0	0	0	0	0	0	0	0	0
VFG038106(gi:126640179)_(A1S_0066)_hypothetical_protein_[Capsule_(CVF775)]_[Acinetobacter_baumannii_ATCC_17978]	Acinetobacter_baumannii_ATCC_17978]	A1S_0066	0	0	2	0	0	0	0	0	0	0	0	0	0	0	0	0	0	0	0	0	0	0	0	0	0	0	0	0	0	0	0	0	0	0	0	0	0	0	0	0	0	0	0	0	0	0	0
VFG037331(gi:126642420)_(basD)_acinetobactin_biosynthesis_protein_[Acinetobactin_(CVF768)]_[Acinetobacter_baumannii_ATCC_17978]	Acinetobacter_baumannii_ATCC_17978]	basD	0	0	2	0	0	0	0	0	0	0	0	0	0	0	0	0	0	0	0	0	0	0	0	0	0	0	0	0	0	0	0	0	0	0	0	0	0	0	0	0	0	0	0	0	0	0	0
VFG037943(gi:126640168)_(A1S_0055)_WecE_protein_[Capsule_(CVF775)]_[Acinetobacter_baumannii_ATCC_17978]	Acinetobacter_baumannii_ATCC_17978]	A1S_0055	0	0	2	0	0	0	0	0	0	0	0	0	0	0	0	0	0	0	0	0	0	0	0	0	0	0	0	0	0	0	0	0	0	0	0	0	0	0	0	0	0	0	0	0	0	0	0
VFG037613(gi:126642259)_(csuD)_protein_CsuD_[Csu_pili_(CVF770)]_[Acinetobacter_baumannii_ATCC_17978]	Acinetobacter_baumannii_ATCC_17978]	csuD	0	0	2	0	0	0	0	0	0	0	0	0	0	0	0	0	0	0	0	0	0	0	0	0	0	0	0	0	0	0	0	0	0	0	0	0	0	0	0	0	0	0	0	0	0	0	0
VFG038220(gi:126640806)_(bfmR)_NarL_family_two-component_response_regulator_[Two-component_system_(CVF778)]_[Acinetobacter_baumannii_ATCC_17978]	Acinetobacter_baumannii_ATCC_17978]	bfmR	0	0	2	0	0	0	0	0	0	0	0	0	0	0	0	0	0	0	0	0	0	0	0	0	0	0	0	0	0	0	0	0	0	0	0	0	0	0	0	0	0	0	0	0	0	0	0
VFG037587(gi:126642261)_(csuB)_protein_CsuB_[Csu_pili_(CVF770)]_[Acinetobacter_baumannii_ATCC_17978]	Acinetobacter_baumannii_ATCC_17978]	csuB	0	0	2	0	0	0	0	0	0	0	0	0	0	0	0	0	0	0	0	0	0	0	0	0	0	0	0	0	0	0	0	0	0	0	0	0	0	0	0	0	0	0	0	0	0	0	0
VFG037665(gi:126642206)_(pgaB)_hemin_storage_signal_peptide_protein_[PNAG_(Polysaccharide_poly-N-acetylglucosamine)_(CVF772)]_[Acinetobacter_baumannii_ATCC_17978]	Acinetobacter_baumannii_ATCC_17978]	pgaB	0	0	2	0	0	0	0	0	0	0	0	0	0	0	0	0	0	0	0	0	0	0	0	0	0	0	0	0	0	0	0	0	0	0	0	0	0	0	0	0	0	0	0	0	0	0	0
VFG038018(gi:126640173)_(A1S_0060)_hypothetical_protein_[Capsule_(CVF775)]_[Acinetobacter_baumannii_ATCC_17978]	Acinetobacter_baumannii_ATCC_17978]	A1S_0060	0	0	2	0	0	0	0	0	0	0	0	0	0	0	0	0	0	0	0	0	0	0	0	0	0	0	0	0	0	0	0	0	0	0	0	0	0	0	0	0	0	0	0	0	0	0	0
VFG037600(gi:126642260)_(csuC)_protein_CsuC_[Csu_pili_(CVF770)]_[Acinetobacter_baumannii_ATCC_17978]	Acinetobacter_baumannii_ATCC_17978]	csuC	0	0	2	0	0	0	0	0	0	0	0	0	0	0	0	0	0	0	0	0	0	0	0	0	0	0	0	0	0	0	0	0	0	0	0	0	0	0	0	0	0	0	0	0	0	0	0
VFG037651(gi:126642207)_(pgaA)_hypothetical_protein_[PNAG_(Polysaccharide_poly-N-acetylglucosamine)_(CVF772)]_[Acinetobacter_baumannii_ATCC_17978]	Acinetobacter_baumannii_ATCC_17978]	pgaA	0	0	2	0	0	0	0	0	0	0	0	0	0	0	0	0	0	0	0	0	0	0	0	0	0	0	0	0	0	0	0	0	0	0	0	0	0	0	0	0	0	0	0	0	0	0	0
VFG037359(gi:126642422)_(bauA)_ferric_acinetobactin_receptor_[Acinetobactin_(CVF768)]_[Acinetobacter_baumannii_ATCC_17978]	Acinetobacter_baumannii_ATCC_17978]	bauA	0	0	2	0	0	0	0	0	0	0	0	0	0	0	0	0	0	0	0	0	0	0	0	0	0	0	0	0	0	0	0	0	0	0	0	0	0	0	0	0	0	0	0	0	0	0	0
VFG037345(gi:126642421)_(basC)_BasC_[Acinetobactin_(CVF768)]_[Acinetobacter_baumannii_ATCC_17978]	Acinetobacter_baumannii_ATCC_17978]	basC	0	0	2	0	0	0	0	0	0	0	0	0	0	0	0	0	0	0	0	0	0	0	0	0	0	0	0	0	0	0	0	0	0	0	0	0	0	0	0	0	0	0	0	0	0	0	0
VFG037443(gi:126642428)_(basA)_acinetobactin_biosynthesis_protein_[Acinetobactin_(CVF768)]_[Acinetobacter_baumannii_ATCC_17978]	Acinetobacter_baumannii_ATCC_17978]	basA	0	0	2	0	0	0	0	0	0	0	0	0	0	0	0	0	0	0	0	0	0	0	0	0	0	0	0	0	0	0	0	0	0	0	0	0	0	0	0	0	0	0	0	0	0	0	0
VFG037429(gi:126642427)_(basB)_acinetobactin_biosynthesis_protein_[Acinetobactin_(CVF768)]_[Acinetobacter_baumannii_ATCC_17978]	Acinetobacter_baumannii_ATCC_17978]	basB	0	0	2	0	0	0	0	0	0	0	0	0	0	0	0	0	0	0	0	0	0	0	0	0	0	0	0	0	0	0	0	0	0	0	0	0	0	0	0	0	0	0	0	0	0	0	0
VFG037626(gi:126642258)_(csuE)_protein_CsuE_[Csu_pili_(CVF770)]_[Acinetobacter_baumannii_ATCC_17978]	Acinetobacter_baumannii_ATCC_17978]	csuE	0	0	2	0	0	0	0	0	0	0	0	0	0	0	0	0	0	0	0	0	0	0	0	0	0	0	0	0	0	0	0	0	0	0	0	0	0	0	0	0	0	0	0	0	0	0	0
VFG038078(gi:126640177)_(pgi)_glucose-6-phosphate_isomerase_[Capsule_(CVF775)]_[Acinetobacter_baumannii_ATCC_17978]	Acinetobacter_baumannii_ATCC_17978]	pgi	0	0	2	0	0	0	0	0	0	0	0	0	0	0	0	0	0	0	0	0	0	0	0	0	0	0	0	0	0	0	0	0	0	0	0	0	0	0	0	0	0	0	0	0	0	0	0
VFG037574(gi:126642262)_(csuA)_protein_CsuA_[Csu_pili_(CVF770)]_[Acinetobacter_baumannii_ATCC_17978]	Acinetobacter_baumannii_ATCC_17978]	csuA	0	0	2	0	0	0	0	0	0	0	0	0	0	0	0	0	0	0	0	0	0	0	0	0	0	0	0	0	0	0	0	0	0	0	0	0	0	0	0	0	0	0	0	0	0	0	0
VFG037793(gi:126642010)_(lpxA)_UDP-N-acetylglucosamine_acyltransferase_[LPS_(CVF774)]_[Acinetobacter_baumannii_ATCC_17978]	Acinetobacter_baumannii_ATCC_17978]	lpxA	0	0	2	0	0	0	0	0	0	0	0	0	0	0	0	0	0	0	0	0	0	0	0	0	0	0	0	0	0	0	0	0	0	0	0	0	0	0	0	0	0	0	0	0	0	0	0
VFG037763(gi:126640504)_(lpxL)_lipid_A_biosynthesis_lauroyl_acyltransferase_[LPS_(CVF774)]_[Acinetobacter_baumannii_ATCC_17978]	Acinetobacter_baumannii_ATCC_17978]	lpxL	0	0	2	0	0	0	0	0	0	0	0	0	0	0	0	0	0	0	0	0	0	0	0	0	0	0	0	0	0	0	0	0	0	0	0	0	0	0	0	0	0	0	0	0	0	0	0
VFG037748(gi:126642644)_(lpxM)_lipid_A_biosynthesis_lauroyl_acyltransferase_[LPS_(CVF774)]_[Acinetobacter_baumannii_ATCC_17978]	Acinetobacter_baumannii_ATCC_17978]	lpxM	0	0	2	0	0	0	0	0	0	0	0	0	0	0	0	0	0	0	0	0	0	0	0	0	0	0	0	0	0	0	0	0	0	0	0	0	0	0	0	0	0	0	0	0	0	0	0
VFG037415(gi:126642426)_(bauD)_ferric_acinetobactin_transport_system_permease_protein_[Acinetobactin_(CVF768)]_[Acinetobacter_baumannii_ATCC_17978]	Acinetobacter_baumannii_ATCC_17978]	bauD	0	0	2	0	0	0	0	0	0	0	0	0	0	0	0	0	0	0	0	0	0	0	0	0	0	0	0	0	0	0	0	0	0	0	0	0	0	0	0	0	0	0	0	0	0	0	0
VFG038048(gi:126640175)_(A1S_0062)_UTP-glucose-1-phosphate_uridylyltransferase_[Capsule_(CVF775)]_[Acinetobacter_baumannii_ATCC_17978]	Acinetobacter_baumannii_ATCC_17978]	A1S_0062	0	0	2	0	0	0	0	0	0	0	0	0	0	0	0	0	0	0	0	0	0	0	0	0	0	0	0	0	0	0	0	0	0	0	0	0	0	0	0	0	0	0	0	0	0	0	0
VFG037838(gi:126642012)_(lpxD)_UDP-3-O-[3-hydroxymyristoyl]_glucosamine_N-acyltransferase_[LPS_(CVF774)]_[Acinetobacter_baumannii_ATCC_17978]	Acinetobacter_baumannii_ATCC_17978]	lpxD	0	0	2	0	0	0	0	0	0	0	0	0	0	0	0	0	0	0	0	0	0	0	0	0	0	0	0	0	0	0	0	0	0	0	0	0	0	0	0	0	0	0	0	0	0	0	0
VFG037736(gi:126642347)_(adeH)_RND_efflux_transporter_[AdeFGH_efflux_pump/transport_autoinducer_(CVF773)]_[Acinetobacter_baumannii_ATCC_17978]	Acinetobacter_baumannii_ATCC_17978]	adeH	0	0	2	0	0	0	0	0	0	0	0	0	0	0	0	0	0	0	0	0	0	0	0	0	0	0	0	0	0	0	0	0	0	0	0	0	0	0	0	0	0	0	0	0	0	0	0
VFG037373(gi:126642423)_(bauB)_ferric_acinetobactin_binding_protein_[Acinetobactin_(CVF768)]_[Acinetobacter_baumannii_ATCC_17978]	Acinetobacter_baumannii_ATCC_17978]	bauB	0	0	2	0	0	0	0	0	0	0	0	0	0	0	0	0	0	0	0	0	0	0	0	0	0	0	0	0	0	0	0	0	0	0	0	0	0	0	0	0	0	0	0	0	0	0	0
VFG037958(gi:126640169)_(A1S_0056)_O-antigen_translocase_[Capsule_(CVF775)]_[Acinetobacter_baumannii_ATCC_17978]	Acinetobacter_baumannii_ATCC_17978]	A1S_0056	0	0	2	0	0	0	0	0	0	0	0	0	0	0	0	0	0	0	0	0	0	0	0	0	0	0	0	0	0	0	0	0	0	0	0	0	0	0	0	0	0	0	0	0	0	0	0
VFG038192(gi:126640214)_(abaI)_homoserine_lactone_synthase_[Quorum_sensing_(CVF777)]_[Acinetobacter_baumannii_ATCC_17978]	Acinetobacter_baumannii_ATCC_17978]	abaI	0	0	2	0	0	0	0	0	0	0	0	0	0	0	0	0	0	0	0	0	0	0	0	0	0	0	0	0	0	0	0	0	0	0	0	0	0	0	0	0	0	0	0	0	0	0	0
VFG038250(gi:126640330)_(pbpG)_D-alanyl-D-alanine_endopeptidase_[PbpG_(CVF779)]_[Acinetobacter_baumannii_ATCC_17978]	Acinetobacter_baumannii_ATCC_17978]	pbpG	0	0	2	0	0	0	0	0	0	0	0	0	0	0	0	0	0	0	0	0	0	0	0	0	0	0	0	0	0	0	0	0	0	0	0	0	0	0	0	0	0	0	0	0	0	0	0
VFG038003(gi:126640172)_(A1S_0059)_glycosyltransferase_[Capsule_(CVF775)]_[Acinetobacter_baumannii_ATCC_17978]	Acinetobacter_baumannii_ATCC_17978]	A1S_0059	0	0	2	0	0	0	0	0	0	0	0	0	0	0	0	0	0	0	0	0	0	0	0	0	0	0	0	0	0	0	0	0	0	0	0	0	0	0	0	0	0	0	0	0	0	0	0
VFG037928(gi:126640167)_(A1S_0054)_WbbJ_protein_[Capsule_(CVF775)]_[Acinetobacter_baumannii_ATCC_17978]	Acinetobacter_baumannii_ATCC_17978]	A1S_0054	0	0	2	0	0	0	0	0	0	0	0	0	0	0	0	0	0	0	0	0	0	0	0	0	0	0	0	0	0	0	0	0	0	0	0	0	0	0	0	0	0	0	0	0	0	0	0
VFG037317(gi:126642418)_(entE)_enterobactin_synthase_subunit_E_[Acinetobactin_(CVF768)]_[Acinetobacter_baumannii_ATCC_17978]	Acinetobacter_baumannii_ATCC_17978]	entE	0	0	2	0	0	0	0	0	0	0	0	0	0	0	0	0	0	0	0	0	0	0	0	0	0	0	0	0	0	0	0	0	0	0	0	0	0	0	0	0	0	0	0	0	0	0	0
VFG037289(gi:126642416)_(basG)_histidine_decarboxylase_[Acinetobactin_(CVF768)]_[Acinetobacter_baumannii_ATCC_17978]	Acinetobacter_baumannii_ATCC_17978]	basG	0	0	2	0	0	0	0	0	0	0	0	0	0	0	0	0	0	0	0	0	0	0	0	0	0	0	0	0	0	0	0	0	0	0	0	0	0	0	0	0	0	0	0	0	0	0	0
VFG037275(gi:126642415)_(barA)_ABC_transporter_[Acinetobactin_(CVF768)]_[Acinetobacter_baumannii_ATCC_17978]	Acinetobacter_baumannii_ATCC_17978]	barA	0	0	2	0	0	0	0	0	0	0	0	0	0	0	0	0	0	0	0	0	0	0	0	0	0	0	0	0	0	0	0	0	0	0	0	0	0	0	0	0	0	0	0	0	0	0	0
VFG037178(gi:126640156)_(plc)_hypothetical_protein_[Phospholipase_C_(CVF766)]_[Acinetobacter_baumannii_ATCC_17978]	Acinetobacter_baumannii_ATCC_17978]	plc	0	0	2	0	0	0	0	0	0	0	0	0	0	0	0	0	0	0	0	0	0	0	0	0	0	0	0	0	0	0	0	0	0	0	0	0	0	0	0	0	0	0	0	0	0	0	0
VFG038206(gi:126640216)_(abaR)_transcriptional_regulator_[Quorum_sensing_(CVF777)]_[Acinetobacter_baumannii_ATCC_17978]	Acinetobacter_baumannii_ATCC_17978]	abaR	0	0	2	0	0	0	0	0	0	0	0	0	0	0	0	0	0	0	0	0	0	0	0	0	0	0	0	0	0	0	0	0	0	0	0	0	0	0	0	0	0	0	0	0	0	0	0
VFG037973(gi:126640170)_(A1S_0057)_capsular_polysaccharide_synthesis_enzyme_[Capsule_(CVF775)]_[Acinetobacter_baumannii_ATCC_17978]	Acinetobacter_baumannii_ATCC_17978]	A1S_0057	0	0	2	0	0	0	0	0	0	0	0	0	0	0	0	0	0	0	0	0	0	0	0	0	0	0	0	0	0	0	0	0	0	0	0	0	0	0	0	0	0	0	0	0	0	0	0
VFG037988(gi:126640171)_(A1S_0058)_glycosyltransferase_[Capsule_(CVF775)]_[Acinetobacter_baumannii_ATCC_17978]	Acinetobacter_baumannii_ATCC_17978]	A1S_0058	0	0	2	0	0	0	0	0	0	0	0	0	0	0	0	0	0	0	0	0	0	0	0	0	0	0	0	0	0	0	0	0	0	0	0	0	0	0	0	0	0	0	0	0	0	0	0
VFG037457(gi:126642429)_(bauF)_acinetobactin_utilization_protein_[Acinetobactin_(CVF768)]_[Acinetobacter_baumannii_ATCC_17978]	Acinetobacter_baumannii_ATCC_17978]	bauF	0	0	2	0	0	0	0	0	0	0	0	0	0	0	0	0	0	0	0	0	0	0	0	0	0	0	0	0	0	0	0	0	0	0	0	0	0	0	0	0	0	0	0	0	0	0	0
VFG037387(gi:126642424)_(bauE)_BauE_[Acinetobactin_(CVF768)]_[Acinetobacter_baumannii_ATCC_17978]	Acinetobacter_baumannii_ATCC_17978]	bauE	0	0	2	0	0	0	0	0	0	0	0	0	0	0	0	0	0	0	0	0	0	0	0	0	0	0	0	0	0	0	0	0	0	0	0	0	0	0	0	0	0	0	0	0	0	0	0
VFG037219(gi:126642409)_(basJ)_acinetobactin_biosynthesis_protein_[Acinetobactin_(CVF768)]_[Acinetobacter_baumannii_ATCC_17978]	Acinetobacter_baumannii_ATCC_17978]	basJ	0	0	2	0	0	0	0	0	0	0	0	0	0	0	0	0	0	0	0	0	0	0	0	0	0	0	0	0	0	0	0	0	0	0	0	0	0	0	0	0	0	0	0	0	0	0	0
VFG037778(gi:126640503)_(lpsB)_glycosyltransferase_[LPS_(CVF774)]_[Acinetobacter_baumannii_ATCC_17978]	Acinetobacter_baumannii_ATCC_17978]	lpsB	0	0	2	0	0	0	0	0	0	0	0	0	0	0	0	0	0	0	0	0	0	0	0	0	0	0	0	0	0	0	0	0	0	0	0	0	0	0	0	0	0	0	0	0	0	0	0
VFG037247(gi:126642411)_(basH)_acinetobactin_biosynthesis_protein_[Acinetobactin_(CVF768)]_[Acinetobacter_baumannii_ATCC_17978]	Acinetobacter_baumannii_ATCC_17978]	basH	0	0	2	0	0	0	0	0	0	0	0	0	0	0	0	0	0	0	0	0	0	0	0	0	0	0	0	0	0	0	0	0	0	0	0	0	0	0	0	0	0	0	0	0	0	0	0
VFG037868(gi:126640163)_(A1S_0050)_protein_tyrosine_phosphatase_[Capsule_(CVF775)]_[Acinetobacter_baumannii_ATCC_17978]	Acinetobacter_baumannii_ATCC_17978]	A1S_0050	0	0	2	0	0	0	0	0	0	0	0	0	0	0	0	0	0	0	0	0	0	0	0	0	0	0	0	0	0	0	0	0	0	0	0	0	0	0	0	0	0	0	0	0	0	0	0
VFG038063(gi:126640176)_(A1S_0063)_UDP-glucose_6-dehydrogenase_[Capsule_(CVF775)]_[Acinetobacter_baumannii_ATCC_17978]	Acinetobacter_baumannii_ATCC_17978]	A1S_0063	0	0	2	0	0	0	0	0	0	0	0	0	0	0	0	0	0	0	0	0	0	0	0	0	0	0	0	0	0	0	0	0	0	0	0	0	0	0	0	0	0	0	0	0	0	0	0
VFG037471(gi:126640967)_(A1S_0917)_transcriptional_regulator_[Heme_utilization__(CVF769)]_[Acinetobacter_baumannii_ATCC_17978]	Acinetobacter_baumannii_ATCC_17978]	A1S_0917	0	0	2	0	0	0	0	0	0	0	0	0	0	0	0	0	0	0	0	0	0	0	0	0	0	0	0	0	0	0	0	0	0	0	0	0	0	0	0	0	0	0	0	0	0	0	0
VFG037204(gi:126643010)_(plcD)_phospholipase_D_protein_[Phospholipase_D_(CVF767)]_[Acinetobacter_baumannii_ATCC_17978]	Acinetobacter_baumannii_ATCC_17978]	plcD	0	0	2	0	0	0	0	0	0	0	0	0	0	0	0	0	0	0	0	0	0	0	0	0	0	0	0	0	0	0	0	0	0	0	0	0	0	0	0	0	0	0	0	0	0	0	0
VFG038092(gi:126640178)_(A1S_0065)_UDP-glucose_4-epimerase_[Capsule_(CVF775)]_[Acinetobacter_baumannii_ATCC_17978]	Acinetobacter_baumannii_ATCC_17978]	A1S_0065	0	0	2	0	0	0	0	0	0	0	0	0	0	0	0	0	0	0	0	0	0	0	0	0	0	0	0	0	0	0	0	0	0	0	0	0	0	0	0	0	0	0	0	0	0	0	0
VFG037303(gi:126642417)_(basF)_acinetobactin_biosynthesis_protein_[Acinetobactin_(CVF768)]_[Acinetobacter_baumannii_ATCC_17978]	Acinetobacter_baumannii_ATCC_17978]	basF	0	0	2	0	0	0	0	0	0	0	0	0	0	0	0	0	0	0	0	0	0	0	0	0	0	0	0	0	0	0	0	0	0	0	0	0	0	0	0	0	0	0	0	0	0	0	0
VFG037913(gi:126640166)_(A1S_0053)_MviM_protein_[Capsule_(CVF775)]_[Acinetobacter_baumannii_ATCC_17978]	Acinetobacter_baumannii_ATCC_17978]	A1S_0053	0	0	2	0	0	0	0	0	0	0	0	0	0	0	0	0	0	0	0	0	0	0	0	0	0	0	0	0	0	0	0	0	0	0	0	0	0	0	0	0	0	0	0	0	0	0	0
VFG038033(gi:126640174)_(A1S_0061)_UDP-galactose_phosphate_transferase_[Capsule_(CVF775)]_[Acinetobacter_baumannii_ATCC_17978]	Acinetobacter_baumannii_ATCC_17978]	A1S_0061	0	0	2	0	0	0	0	0	0	0	0	0	0	0	0	0	0	0	0	0	0	0	0	0	0	0	0	0	0	0	0	0	0	0	0	0	0	0	0	0	0	0	0	0	0	0	0
VFG038235(gi:126640807)_(bfmS)_protein_BfmS_[Two-component_system_(CVF778)]_[Acinetobacter_baumannii_ATCC_17978]	Acinetobacter_baumannii_ATCC_17978]	bfmS	0	0	2	0	0	0	0	0	0	0	0	0	0	0	0	0	0	0	0	0	0	0	0	0	0	0	0	0	0	0	0	0	0	0	0	0	0	0	0	0	0	0	0	0	0	0	0
VFG037233(gi:126642410)_(basI)_acinetobactin_biosynthesis_protein_[Acinetobactin_(CVF768)]_[Acinetobacter_baumannii_ATCC_17978]	Acinetobacter_baumannii_ATCC_17978]	basI	0	0	2	0	0	0	0	0	0	0	0	0	0	0	0	0	0	0	0	0	0	0	0	0	0	0	0	0	0	0	0	0	0	0	0	0	0	0	0	0	0	0	0	0	0	0	0
VFG037706(gi:126642345)_(adeF)_RND_efflux_transporter_[AdeFGH_efflux_pump/transport_autoinducer_(CVF773)]_[Acinetobacter_baumannii_ATCC_17978]	Acinetobacter_baumannii_ATCC_17978]	adeF	0	0	2	0	0	0	0	0	0	0	0	0	0	0	0	0	0	0	0	0	0	0	0	0	0	0	0	0	0	0	0	0	0	0	0	0	0	0	0	0	0	0	0	0	0	0	0
VFG037561(gi:126642263)_(csuA/B)_protein_CsuA/B_[Csu_pili_(CVF770)]_[Acinetobacter_baumannii_ATCC_17978]	Acinetobacter_baumannii_ATCC_17978]	csuA/B	0	0	2	0	0	0	0	0	0	0	0	0	0	0	0	0	0	0	0	0	0	0	0	0	0	0	0	0	0	0	0	0	0	0	0	0	0	0	0	0	0	0	0	0	0	0	0
VFG037640(gi:169794956)_(bap)_hypothetical_protein_[Biofilm-associated_protein_(CVF771)]_[Acinetobacter_baumannii_AYE]	Acinetobacter_baumannii_AYE]	bap	0	0	2	0	0	0	0	0	0	0	0	0	0	0	0	0	0	0	0	0	0	0	0	0	0	0	0	0	0	0	0	0	0	0	0	0	0	0	0	0	0	0	0	0	0	0	0
VFG038236(gi:169797061)_(bfmS)_sensory_histidine_kinase_in_two-component_regulatory_system_[Two-component_system_(CVF778)]_[Acinetobacter_baumannii_AYE]	Acinetobacter_baumannii_AYE]	bfmS	0	0	2	0	0	0	0	0	0	0	0	0	0	0	0	0	0	0	0	0	0	0	0	0	0	0	0	0	0	0	0	0	0	0	0	0	0	0	0	0	0	0	0	0	0	0	0
VFG038004(gi:169797734)_(ABAYE3810)_polysaccharide_polymerase_[Capsule_(CVF775)]_[Acinetobacter_baumannii_AYE]	Acinetobacter_baumannii_AYE]	ABAYE3810	0	0	2	0	0	0	0	0	0	0	0	0	0	0	0	0	0	0	0	0	0	0	0	0	0	0	0	0	0	0	0	0	0	0	0	0	0	0	0	0	0	0	0	0	0	0	0
VFG037180(gi:169797748)_(plc)_phospholipase_C_[Phospholipase_C_(CVF766)]_[Acinetobacter_baumannii_AYE]	Acinetobacter_baumannii_AYE]	plc	0	0	2	0	0	0	0	0	0	0	0	0	0	0	0	0	0	0	0	0	0	0	0	0	0	0	0	0	0	0	0	0	0	0	0	0	0	0	0	0	0	0	0	0	0	0	0
VFG037974(gi:169797732)_(ABAYE3808)_UDP-galactose_phosphate_transferase_(WeeH)_[Capsule_(CVF775)]_[Acinetobacter_baumannii_AYE]	Acinetobacter_baumannii_AYE]	ABAYE3808	0	0	2	0	0	0	0	0	0	0	0	0	0	0	0	0	0	0	0	0	0	0	0	0	0	0	0	0	0	0	0	0	0	0	0	0	0	0	0	0	0	0	0	0	0	0	0
VFG037575(gi:169795446)_(csuA)_protein_CsuA_[Csu_pili_(CVF770)]_[Acinetobacter_baumannii_AYE]	Acinetobacter_baumannii_AYE]	csuA	0	0	2	0	0	0	0	0	0	0	0	0	0	0	0	0	0	0	0	0	0	0	0	0	0	0	0	0	0	0	0	0	0	0	0	0	0	0	0	0	0	0	0	0	0	0	0
VFG038034(gi:169797736)_(ABAYE3812)_glycosyl_transferase_family_protein_[Capsule_(CVF775)]_[Acinetobacter_baumannii_AYE]	Acinetobacter_baumannii_AYE]	ABAYE3812	0	0	2	0	0	0	0	0	0	0	0	0	0	0	0	0	0	0	0	0	0	0	0	0	0	0	0	0	0	0	0	0	0	0	0	0	0	0	0	0	0	0	0	0	0	0	0
VFG037614(gi:169795449)_(csuD)_protein_CsuD;_type_I_pili_usher_protein_[Csu_pili_(CVF770)]_[Acinetobacter_baumannii_AYE]	Acinetobacter_baumannii_AYE]	csuD	0	0	2	0	0	0	0	0	0	0	0	0	0	0	0	0	0	0	0	0	0	0	0	0	0	0	0	0	0	0	0	0	0	0	0	0	0	0	0	0	0	0	0	0	0	0	0
VFG037548(gi:169796884)_(ABAYE2875)_hypothetical_protein_[Heme_utilization__(CVF769)]_[Acinetobacter_baumannii_AYE]	Acinetobacter_baumannii_AYE]	ABAYE2875	0	0	2	0	0	0	0	0	0	0	0	0	0	0	0	0	0	0	0	0	0	0	0	0	0	0	0	0	0	0	0	0	0	0	0	0	0	0	0	0	0	0	0	0	0	0	0
VFG037627(gi:169795450)_(csuE)_protein_CsuE;_secreted_protein_related_to_type_I_pili_[Csu_pili_(CVF770)]_[Acinetobacter_baumannii_AYE]	Acinetobacter_baumannii_AYE]	csuE	0	0	2	0	0	0	0	0	0	0	0	0	0	0	0	0	0	0	0	0	0	0	0	0	0	0	0	0	0	0	0	0	0	0	0	0	0	0	0	0	0	0	0	0	0	0	0
VFG037989(gi:169797733)_(ABAYE3809)_glycosyl_transferase_family_protein_[Capsule_(CVF775)]_[Acinetobacter_baumannii_AYE]	Acinetobacter_baumannii_AYE]	ABAYE3809	0	0	2	0	0	0	0	0	0	0	0	0	0	0	0	0	0	0	0	0	0	0	0	0	0	0	0	0	0	0	0	0	0	0	0	0	0	0	0	0	0	0	0	0	0	0	0
VFG037360(gi:169795232)_(bauA)_ferric_acinetobactin_receptor_(bauA)_[Acinetobactin_(CVF768)]_[Acinetobacter_baumannii_AYE]	Acinetobacter_baumannii_AYE]	bauA	0	0	2	0	0	0	0	0	0	0	0	0	0	0	0	0	0	0	0	0	0	0	0	0	0	0	0	0	0	0	0	0	0	0	0	0	0	0	0	0	0	0	0	0	0	0	0
VFG037652(gi:169795513)_(pgaA)_biofilm_synthesis_protein_[PNAG_(Polysaccharide_poly-N-acetylglucosamine)_(CVF772)]_[Acinetobacter_baumannii_AYE]	Acinetobacter_baumannii_AYE]	pgaA	0	0	2	0	0	0	0	0	0	0	0	0	0	0	0	0	0	0	0	0	0	0	0	0	0	0	0	0	0	0	0	0	0	0	0	0	0	0	0	0	0	0	0	0	0	0	0
VFG037601(gi:169795448)_(csuC)_protein_CsuC;_type_I_pilus_usher_pathway_chaperone_[Csu_pili_(CVF770)]_[Acinetobacter_baumannii_AYE]	Acinetobacter_baumannii_AYE]	csuC	0	0	2	0	0	0	0	0	0	0	0	0	0	0	0	0	0	0	0	0	0	0	0	0	0	0	0	0	0	0	0	0	0	0	0	0	0	0	0	0	0	0	0	0	0	0	0
VFG037430(gi:169795227)_(basB)_non-ribosomal_peptide_synthase_[Acinetobactin_(CVF768)]_[Acinetobacter_baumannii_AYE]	Acinetobacter_baumannii_AYE]	basB	0	0	2	0	0	0	0	0	0	0	0	0	0	0	0	0	0	0	0	0	0	0	0	0	0	0	0	0	0	0	0	0	0	0	0	0	0	0	0	0	0	0	0	0	0	0	0
VFG037388(gi:169795230)_(bauE)_ferric_acinetobactin_transport_system_ATP-binding_protein_[Acinetobactin_(CVF768)]_[Acinetobacter_baumannii_AYE]	Acinetobacter_baumannii_AYE]	bauE	0	0	2	0	0	0	0	0	0	0	0	0	0	0	0	0	0	0	0	0	0	0	0	0	0	0	0	0	0	0	0	0	0	0	0	0	0	0	0	0	0	0	0	0	0	0	0
VFG038251(gi:169797496)_(pbpG)_D-alanyl-D-alanine_endopeptidase_[PbpG_(CVF779)]_[Acinetobacter_baumannii_AYE]	Acinetobacter_baumannii_AYE]	pbpG	0	0	2	0	0	0	0	0	0	0	0	0	0	0	0	0	0	0	0	0	0	0	0	0	0	0	0	0	0	0	0	0	0	0	0	0	0	0	0	0	0	0	0	0	0	0	0
VFG037181(gi:169795629)_(plc)_phospholipase_C_[Phospholipase_C_(CVF766)]_[Acinetobacter_baumannii_AYE]	Acinetobacter_baumannii_AYE]	plc	0	0	2	0	0	0	0	0	0	0	0	0	0	0	0	0	0	0	0	0	0	0	0	0	0	0	0	0	0	0	0	0	0	0	0	0	0	0	0	0	0	0	0	0	0	0	0
VFG037562(gi:169795445)_(csuA/B)_protein_CsuA/B;_secreted_protein_related_to_type_I_pili_[Csu_pili_(CVF770)]_[Acinetobacter_baumannii_AYE]	Acinetobacter_baumannii_AYE]	csuA/B	0	0	2	0	0	0	0	0	0	0	0	0	0	0	0	0	0	0	0	0	0	0	0	0	0	0	0	0	0	0	0	0	0	0	0	0	0	0	0	0	0	0	0	0	0	0	0
VFG037220(gi:169795242)_(basJ)_isochorismate_synthetase_[Acinetobactin_(CVF768)]_[Acinetobacter_baumannii_AYE]	Acinetobacter_baumannii_AYE]	basJ	0	0	2	0	0	0	0	0	0	0	0	0	0	0	0	0	0	0	0	0	0	0	0	0	0	0	0	0	0	0	0	0	0	0	0	0	0	0	0	0	0	0	0	0	0	0	0
VFG037779(gi:169797318)_(lpsB)_glycosyltransferase_[LPS_(CVF774)]_[Acinetobacter_baumannii_AYE]	Acinetobacter_baumannii_AYE]	lpsB	0	0	2	0	0	0	0	0	0	0	0	0	0	0	0	0	0	0	0	0	0	0	0	0	0	0	0	0	0	0	0	0	0	0	0	0	0	0	0	0	0	0	0	0	0	0	0
VFG037749(gi:169795043)_(lpxM)_lipid_A_biosynthesis_lauroyl_acyltransferase_[LPS_(CVF774)]_[Acinetobacter_baumannii_AYE]	Acinetobacter_baumannii_AYE]	lpxM	0	0	2	0	0	0	0	0	0	0	0	0	0	0	0	0	0	0	0	0	0	0	0	0	0	0	0	0	0	0	0	0	0	0	0	0	0	0	0	0	0	0	0	0	0	0	0
VFG037234(gi:169795241)_(basI)_phosphopantetheinyl_transferase_component_of_acinetobactin_biosynthesis_(basI)_[Acinetobactin_(CVF768)]_[Acinetobacter_baumannii_AYE]	Acinetobacter_baumannii_AYE]	basI	0	0	2	0	0	0	0	0	0	0	0	0	0	0	0	0	0	0	0	0	0	0	0	0	0	0	0	0	0	0	0	0	0	0	0	0	0	0	0	0	0	0	0	0	0	0	0
VFG038193(gi:169797686)_(abaI)_N-acylhomoserine_lactone_synthase,_autoinducer_synthesis_protein_[Quorum_sensing_(CVF777)]_[Acinetobacter_baumannii_AYE]	Acinetobacter_baumannii_AYE]	abaI	0	0	2	0	0	0	0	0	0	0	0	0	0	0	0	0	0	0	0	0	0	0	0	0	0	0	0	0	0	0	0	0	0	0	0	0	0	0	0	0	0	0	0	0	0	0	0
VFG037205(gi:169794680)_(plcD)_phospholipase_D_[Phospholipase_D_(CVF767)]_[Acinetobacter_baumannii_AYE]	Acinetobacter_baumannii_AYE]	plcD	0	0	2	0	0	0	0	0	0	0	0	0	0	0	0	0	0	0	0	0	0	0	0	0	0	0	0	0	0	0	0	0	0	0	0	0	0	0	0	0	0	0	0	0	0	0	0
VFG037738(gi:523524047)_(adeH)_Outer_membrane_protein_[AdeFGH_efflux_pump/transport_autoinducer_(CVF773)]_[Acinetobacter_baumannii_BJAB07104]	Acinetobacter_baumannii_BJAB07104]	adeH	0	0	2	0	0	0	0	0	0	0	0	0	0	0	0	0	0	0	0	0	0	0	0	0	0	0	0	0	0	0	0	0	0	0	0	0	0	0	0	0	0	0	0	0	0	0	0
VFG038020(gi:523521485)_(BJAB07104_00098)_Sugar_transferases_involved_in_lipopolysaccharide_synthesis_[Capsule_(CVF775)]_[Acinetobacter_baumannii_BJAB07104]	Acinetobacter_baumannii_BJAB07104]	BJAB07104_00098	0	0	2	0	0	0	0	0	0	0	0	0	0	0	0	0	0	0	0	0	0	0	0	0	0	0	0	0	0	0	0	0	0	0	0	0	0	0	0	0	0	0	0	0	0	0	0
VFG037900(gi:523521477)_(BJAB07104_00090)_UDP-N-acetyl-D-mannosaminuronate_dehydrogenase_[Capsule_(CVF775)]_[Acinetobacter_baumannii_BJAB07104]	Acinetobacter_baumannii_BJAB07104]	BJAB07104_00090	0	0	2	0	0	0	0	0	0	0	0	0	0	0	0	0	0	0	0	0	0	0	0	0	0	0	0	0	0	0	0	0	0	0	0	0	0	0	0	0	0	0	0	0	0	0	0
VFG038065(gi:523521488)_(BJAB07104_00101)_putative_nucleoside-diphosphate_sugar_epimerase_[Capsule_(CVF775)]_[Acinetobacter_baumannii_BJAB07104]	Acinetobacter_baumannii_BJAB07104]	BJAB07104_00101	0	0	2	0	0	0	0	0	0	0	0	0	0	0	0	0	0	0	0	0	0	0	0	0	0	0	0	0	0	0	0	0	0	0	0	0	0	0	0	0	0	0	0	0	0	0	0
VFG037333(gi:523524121)_(basD)_Non-ribosomal_peptide_synthetase_modules-related_protein_[Acinetobactin_(CVF768)]_[Acinetobacter_baumannii_BJAB07104]	Acinetobacter_baumannii_BJAB07104]	basD	0	0	2	0	0	0	0	0	0	0	0	0	0	0	0	0	0	0	0	0	0	0	0	0	0	0	0	0	0	0	0	0	0	0	0	0	0	0	0	0	0	0	0	0	0	0	0
VFG038005(gi:523521484)_(BJAB07104_00097)_Glycosyltransferase_[Capsule_(CVF775)]_[Acinetobacter_baumannii_BJAB07104]	Acinetobacter_baumannii_BJAB07104]	BJAB07104_00097	0	0	2	0	0	0	0	0	0	0	0	0	0	0	0	0	0	0	0	0	0	0	0	0	0	0	0	0	0	0	0	0	0	0	0	0	0	0	0	0	0	0	0	0	0	0	0
VFG037825(gi:523525006)_(lpxC)_UDP-3-O-acyl-N-acetylglucosamine_deacetylase_[LPS_(CVF774)]_[Acinetobacter_baumannii_BJAB07104]	Acinetobacter_baumannii_BJAB07104]	lpxC	0	0	2	0	0	0	0	0	0	0	0	0	0	0	0	0	0	0	0	0	0	0	0	0	0	0	0	0	0	0	0	0	0	0	0	0	0	0	0	0	0	0	0	0	0	0	0
VFG037990(gi:523521483)_(BJAB07104_00096)_putative_UDP-glucose_6-dehydrogenase_[Capsule_(CVF775)]_[Acinetobacter_baumannii_BJAB07104]	Acinetobacter_baumannii_BJAB07104]	BJAB07104_00096	0	0	2	0	0	0	0	0	0	0	0	0	0	0	0	0	0	0	0	0	0	0	0	0	0	0	0	0	0	0	0	0	0	0	0	0	0	0	0	0	0	0	0	0	0	0	0
VFG037915(gi:523521478)_(BJAB07104_00091)_hypothetical_protein_[Capsule_(CVF775)]_[Acinetobacter_baumannii_BJAB07104]	Acinetobacter_baumannii_BJAB07104]	BJAB07104_00091	0	0	2	0	0	0	0	0	0	0	0	0	0	0	0	0	0	0	0	0	0	0	0	0	0	0	0	0	0	0	0	0	0	0	0	0	0	0	0	0	0	0	0	0	0	0	0
VFG037473(gi:523522397)_(BJAB07104_01013)_Transcriptional_regulator_[Heme_utilization__(CVF769)]_[Acinetobacter_baumannii_BJAB07104]	Acinetobacter_baumannii_BJAB07104]	BJAB07104_01013	0	0	2	0	0	0	0	0	0	0	0	0	0	0	0	0	0	0	0	0	0	0	0	0	0	0	0	0	0	0	0	0	0	0	0	0	0	0	0	0	0	0	0	0	0	0	0
VFG037945(gi:523521480)_(BJAB07104_00093)_Glycosyltransferases_involved_in_cell_wall_biogenesis_[Capsule_(CVF775)]_[Acinetobacter_baumannii_BJAB07104]	Acinetobacter_baumannii_BJAB07104]	BJAB07104_00093	0	0	2	0	0	0	0	0	0	0	0	0	0	0	0	0	0	0	0	0	0	0	0	0	0	0	0	0	0	0	0	0	0	0	0	0	0	0	0	0	0	0	0	0	0	0	0
VFG037930(gi:523521479)_(BJAB07104_00092)_Exopolysaccharide_biosynthesis_protein_[Capsule_(CVF775)]_[Acinetobacter_baumannii_BJAB07104]	Acinetobacter_baumannii_BJAB07104]	BJAB07104_00092	0	0	2	0	0	0	0	0	0	0	0	0	0	0	0	0	0	0	0	0	0	0	0	0	0	0	0	0	0	0	0	0	0	0	0	0	0	0	0	0	0	0	0	0	0	0	0
VFG037628(gi:523523956)_(csuE)_putative_secreted_protein_[Csu_pili_(CVF770)]_[Acinetobacter_baumannii_BJAB07104]	Acinetobacter_baumannii_BJAB07104]	csuE	0	0	2	0	0	0	0	0	0	0	0	0	0	0	0	0	0	0	0	0	0	0	0	0	0	0	0	0	0	0	0	0	0	0	0	0	0	0	0	0	0	0	0	0	0	0	0
VFG038094(gi:523521490)_(BJAB07104_00103)_putative_UDP-glucose_6-dehydrogenase_[Capsule_(CVF775)]_[Acinetobacter_baumannii_BJAB07104]	Acinetobacter_baumannii_BJAB07104]	BJAB07104_00103	0	0	2	0	0	0	0	0	0	0	0	0	0	0	0	0	0	0	0	0	0	0	0	0	0	0	0	0	0	0	0	0	0	0	0	0	0	0	0	0	0	0	0	0	0	0	0
VFG037870(gi:523521475)_(BJAB07104_00088)_Protein-tyrosine-phosphatase_[Capsule_(CVF775)]_[Acinetobacter_baumannii_BJAB07104]	Acinetobacter_baumannii_BJAB07104]	BJAB07104_00088	0	0	2	0	0	0	0	0	0	0	0	0	0	0	0	0	0	0	0	0	0	0	0	0	0	0	0	0	0	0	0	0	0	0	0	0	0	0	0	0	0	0	0	0	0	0	0
VFG038133(gi:523521493)_(BJAB07104_00106)_Phosphomannomutase_[Capsule_(CVF775)]_[Acinetobacter_baumannii_BJAB07104]	Acinetobacter_baumannii_BJAB07104]	BJAB07104_00106	0	0	2	0	0	0	0	0	0	0	0	0	0	0	0	0	0	0	0	0	0	0	0	0	0	0	0	0	0	0	0	0	0	0	0	0	0	0	0	0	0	0	0	0	0	0	0
VFG037855(gi:523521474)_(BJAB07104_00087)_ATPases_involved_in_chromosome_partitioning_[Capsule_(CVF775)]_[Acinetobacter_baumannii_BJAB07104]	Acinetobacter_baumannii_BJAB07104]	BJAB07104_00087	0	0	2	0	0	0	0	0	0	0	0	0	0	0	0	0	0	0	0	0	0	0	0	0	0	0	0	0	0	0	0	0	0	0	0	0	0	0	0	0	0	0	0	0	0	0	0
VFG037641(gi:523524413)_(bap)_hypothetical_protein_[Biofilm-associated_protein_(CVF771)]_[Acinetobacter_baumannii_BJAB07104]	Acinetobacter_baumannii_BJAB07104]	bap	0	0	2	0	0	0	0	0	0	0	0	0	0	0	0	0	0	0	0	0	0	0	0	0	0	0	0	0	0	0	0	0	0	0	0	0	0	0	0	0	0	0	0	0	0	0	0
VFG037975(gi:523521482)_(BJAB07104_00095)_Glycosyltransferases_involved_in_cell_wall_biogenesis_[Capsule_(CVF775)]_[Acinetobacter_baumannii_BJAB07104]	Acinetobacter_baumannii_BJAB07104]	BJAB07104_00095	0	0	2	0	0	0	0	0	0	0	0	0	0	0	0	0	0	0	0	0	0	0	0	0	0	0	0	0	0	0	0	0	0	0	0	0	0	0	0	0	0	0	0	0	0	0	0
VFG038050(gi:523521487)_(BJAB07104_00100)_putative_pyridoxal_phosphate-dependent_enzyme_apparently_involved_in_regulation_of_cell_wall_biogenesis_[Capsule_(CVF775)]_[Acinetobacter_baumannii_BJAB07104]	Acinetobacter_baumannii_BJAB07104]	BJAB07104_00100	0	0	2	0	0	0	0	0	0	0	0	0	0	0	0	0	0	0	0	0	0	0	0	0	0	0	0	0	0	0	0	0	0	0	0	0	0	0	0	0	0	0	0	0	0	0	0
VFG037960(gi:523521481)_(BJAB07104_00094)_hypothetical_protein_[Capsule_(CVF775)]_[Acinetobacter_baumannii_BJAB07104]	Acinetobacter_baumannii_BJAB07104]	BJAB07104_00094	0	0	2	0	0	0	0	0	0	0	0	0	0	0	0	0	0	0	0	0	0	0	0	0	0	0	0	0	0	0	0	0	0	0	0	0	0	0	0	0	0	0	0	0	0	0	0
VFG037885(gi:523521476)_(BJAB07104_00089)_Periplasmic_protein_involved_in_polysaccharide_export_[Capsule_(CVF775)]_[Acinetobacter_baumannii_BJAB07104]	Acinetobacter_baumannii_BJAB07104]	BJAB07104_00089	0	0	2	0	0	0	0	0	0	0	0	0	0	0	0	0	0	0	0	0	0	0	0	0	0	0	0	0	0	0	0	0	0	0	0	0	0	0	0	0	0	0	0	0	0	0	0
VFG038108(gi:523521491)_(BJAB07104_00104)_Glucose-6-phosphate_isomerase_[Capsule_(CVF775)]_[Acinetobacter_baumannii_BJAB07104]	Acinetobacter_baumannii_BJAB07104]	BJAB07104_00104	0	0	2	0	0	0	0	0	0	0	0	0	0	0	0	0	0	0	0	0	0	0	0	0	0	0	0	0	0	0	0	0	0	0	0	0	0	0	0	0	0	0	0	0	0	0	0
VFG038121(gi:523521492)_(BJAB07104_00105)_UDP-glucose_4-epimerase_[Capsule_(CVF775)]_[Acinetobacter_baumannii_BJAB07104]	Acinetobacter_baumannii_BJAB07104]	BJAB07104_00105	0	0	2	0	0	0	0	0	0	0	0	0	0	0	0	0	0	0	0	0	0	0	0	0	0	0	0	0	0	0	0	0	0	0	0	0	0	0	0	0	0	0	0	0	0	0	0
VFG038080(gi:523521489)_(BJAB07104_00102)_UDP-glucose_pyrophosphorylase_[Capsule_(CVF775)]_[Acinetobacter_baumannii_BJAB07104]	Acinetobacter_baumannii_BJAB07104]	BJAB07104_00102	0	0	2	0	0	0	0	0	0	0	0	0	0	0	0	0	0	0	0	0	0	0	0	0	0	0	0	0	0	0	0	0	0	0	0	0	0	0	0	0	0	0	0	0	0	0	0
VFG038208(gi:523521534)_(abaR)_DNA-binding_HTH_domain-containing_protein_[Quorum_sensing_(CVF777)]_[Acinetobacter_baumannii_BJAB07104]	Acinetobacter_baumannii_BJAB07104]	abaR	0	0	2	0	0	0	0	0	0	0	0	0	0	0	0	0	0	0	0	0	0	0	0	0	0	0	0	0	0	0	0	0	0	0	0	0	0	0	0	0	0	0	0	0	0	0	0
VFG038035(gi:523521486)_(BJAB07104_00099)_Acetyltransferase_(isoleucine_patch_superfamily)_[Capsule_(CVF775)]_[Acinetobacter_baumannii_BJAB07104]	Acinetobacter_baumannii_BJAB07104]	BJAB07104_00099	0	0	2	0	0	0	0	0	0	0	0	0	0	0	0	0	0	0	0	0	0	0	0	0	0	0	0	0	0	0	0	0	0	0	0	0	0	0	0	0	0	0	0	0	0	0	0
VFG037182(gi:523521467)_(plc)_Phospholipase_C_[Phospholipase_C_(CVF766)]_[Acinetobacter_baumannii_BJAB07104]	Acinetobacter_baumannii_BJAB07104]	plc	0	0	2	0	0	0	0	0	0	0	0	0	0	0	0	0	0	0	0	0	0	0	0	0	0	0	0	0	0	0	0	0	0	0	0	0	0	0	0	0	0	0	0	0	0	0	0
VFG038194(gi:523521532)_(abaI)_N-acyl-L-homoserine_lactone_synthetase_[Quorum_sensing_(CVF777)]_[Acinetobacter_baumannii_BJAB07104]	Acinetobacter_baumannii_BJAB07104]	abaI	0	0	2	0	0	0	0	0	0	0	0	0	0	0	0	0	0	0	0	0	0	0	0	0	0	0	0	0	0	0	0	0	0	0	0	0	0	0	0	0	0	0	0	0	0	0	0
VFG038172(gi:523529236)_(BJAB0715_00115)_Phosphomannomutase_[Capsule_(CVF775)]_[Acinetobacter_baumannii_BJAB0715]	Acinetobacter_baumannii_BJAB0715]	BJAB0715_00115	2	0	2	0	0	0	0	0	0	0	0	0	0	0	0	0	0	0	0	0	0	0	0	0	0	0	0	0	0	0	0	0	0	0	0	0	0	0	0	0	0	0	0	0	0	0	0
VFG038066(gi:523529225)_(BJAB0715_00104)_putative_nucleoside-diphosphate_sugar_epimerase_[Capsule_(CVF775)]_[Acinetobacter_baumannii_BJAB0715]	Acinetobacter_baumannii_BJAB0715]	BJAB0715_00104	2	0	2	0	0	0	0	0	0	0	0	0	0	0	0	0	0	0	0	0	0	0	0	0	0	0	0	0	0	0	0	0	0	0	0	0	0	0	0	0	0	0	0	0	0	0	0
VFG037376(gi:523531909)_(bauB)_ABC-type_enterochelin_transport_system,_periplasmic_component_[Acinetobactin_(CVF768)]_[Acinetobacter_baumannii_BJAB0715]	Acinetobacter_baumannii_BJAB0715]	bauB	1	0	2	0	0	0	0	0	0	0	0	0	0	0	0	0	0	0	0	0	0	0	0	0	0	0	0	0	0	0	0	0	0	0	0	0	0	0	0	0	0	0	1	0	0	0	0
VFG037724(gi:523531828)_(adeG)_Cation/multidrug_efflux_pump_[AdeFGH_efflux_pump/transport_autoinducer_(CVF773)]_[Acinetobacter_baumannii_BJAB0715]	Acinetobacter_baumannii_BJAB0715]	adeG	1	0	2	0	0	0	0	0	0	0	0	0	0	0	0	0	0	0	0	0	0	0	0	0	0	0	0	0	0	0	0	0	0	0	0	0	0	0	0	0	0	0	0	0	0	0	0
VFG037642(gi:523532194)_(bap)_hypothetical_protein_[Biofilm-associated_protein_(CVF771)]_[Acinetobacter_baumannii_BJAB0715]	Acinetobacter_baumannii_BJAB0715]	bap	0	0	2	0	0	0	0	0	0	0	0	0	0	0	0	0	0	0	0	0	0	0	0	0	0	0	0	0	0	0	0	0	0	0	0	0	0	0	0	0	0	0	0	0	0	0	0
VFG037474(gi:523530145)_(BJAB0715_01024)_Transcriptional_regulator_[Heme_utilization__(CVF769)]_[Acinetobacter_baumannii_BJAB0715]	Acinetobacter_baumannii_BJAB0715]	BJAB0715_01024	0	0	2	0	0	0	0	0	0	0	0	0	0	0	0	0	0	0	0	0	0	0	0	0	0	0	0	0	0	0	0	0	0	0	0	0	0	0	0	0	0	0	0	0	0	0	0
VFG037751(gi:523532102)_(lpxM)_Lauroyl/myristoyl_acyltransferase_[LPS_(CVF774)]_[Acinetobacter_baumannii_BJAB0715]	Acinetobacter_baumannii_BJAB0715]	lpxM	0	0	2	0	0	0	0	0	0	0	0	0	0	0	0	0	0	0	0	0	0	0	0	0	0	0	0	0	0	0	0	0	0	0	0	0	0	0	0	0	0	0	0	0	0	0	0
VFG037483(gi:523530146)_(BJAB0715_01025)_DNA-directed_RNA_polymerase_specialized_sigma_subunit,_sigma24-like_protein_[Heme_utilization__(CVF769)]_[Acinetobacter_baumannii_BJAB0715]	Acinetobacter_baumannii_BJAB0715]	BJAB0715_01025	0	0	2	0	0	0	0	0	0	0	0	0	0	0	0	0	0	0	0	0	0	0	0	0	0	0	0	0	0	0	0	0	0	0	0	0	0	0	0	0	0	0	0	0	0	0	0
VFG038051(gi:523529224)_(BJAB0715_00103)_Glycosyltransferase_[Capsule_(CVF775)]_[Acinetobacter_baumannii_BJAB0715]	Acinetobacter_baumannii_BJAB0715]	BJAB0715_00103	0	0	2	0	0	0	0	0	0	0	0	0	0	0	0	0	0	0	0	0	0	0	0	0	0	0	0	0	0	0	0	0	0	0	0	0	0	0	0	0	0	0	0	0	0	0	0
VFG037841(gi:523531358)_(lpxD)_UDP-3-O-[3-hydroxymyristoyl]_glucosamine_N-acyltransferase_[LPS_(CVF774)]_[Acinetobacter_baumannii_BJAB0715]	Acinetobacter_baumannii_BJAB0715]	lpxD	0	0	2	0	0	0	0	0	0	0	0	0	0	0	0	0	0	0	0	0	0	0	0	0	0	0	0	0	0	0	0	0	0	0	0	0	0	0	0	0	0	0	0	0	0	0	0
VFG038036(gi:523529223)_(BJAB0715_00102)_hypothetical_protein_[Capsule_(CVF775)]_[Acinetobacter_baumannii_BJAB0715]	Acinetobacter_baumannii_BJAB0715]	BJAB0715_00102	0	0	2	0	0	0	0	0	0	0	0	0	0	0	0	0	0	0	0	0	0	0	0	0	0	0	0	0	0	0	0	0	0	0	0	0	0	0	0	0	0	0	0	0	0	0	0
VFG037207(gi:523532463)_(plcD)_Phosphatidylserine/phosphatidylglycerophosphate/cardiolipin_synthase-related_enzyme_[Phospholipase_D_(CVF767)]_[Acinetobacter_baumannii_BJAB0715]	Acinetobacter_baumannii_BJAB0715]	plcD	0	0	2	0	0	0	0	0	0	0	0	0	0	0	0	0	0	0	0	0	0	0	0	0	0	0	0	0	0	0	0	0	0	0	0	0	0	0	0	0	0	0	0	0	0	0	0
VFG037348(gi:523531907)_(basC)_Lysine/ornithine_N-monooxygenase_[Acinetobactin_(CVF768)]_[Acinetobacter_baumannii_BJAB0715]	Acinetobacter_baumannii_BJAB0715]	basC	0	0	2	0	0	0	0	0	0	0	0	0	0	0	0	0	0	0	0	0	0	0	0	0	0	0	0	0	0	0	0	0	0	0	0	0	0	0	0	0	0	0	0	0	0	0	0
VFG037498(gi:523530148)_(BJAB0715_01027)_Outer_membrane_receptor_protein,_mostly_Fe_transport_[Heme_utilization__(CVF769)]_[Acinetobacter_baumannii_BJAB0715]	Acinetobacter_baumannii_BJAB0715]	BJAB0715_01027	0	0	2	0	0	0	0	0	0	0	0	0	0	0	0	0	0	0	0	0	0	0	0	0	0	0	0	0	0	0	0	0	0	0	0	0	0	0	0	0	0	0	0	0	0	0	0
VFG037306(gi:523531904)_(basF)_Isochorismate_hydrolase_[Acinetobactin_(CVF768)]_[Acinetobacter_baumannii_BJAB0715]	Acinetobacter_baumannii_BJAB0715]	basF	0	0	2	0	0	0	0	0	0	0	0	0	0	0	0	0	0	0	0	0	0	0	0	0	0	0	0	0	0	0	0	0	0	0	0	0	0	0	0	0	0	0	0	0	0	0	0
VFG038209(gi:523529280)_(abaR)_DNA-binding_HTH_domain-containing_protein_[Quorum_sensing_(CVF777)]_[Acinetobacter_baumannii_BJAB0715]	Acinetobacter_baumannii_BJAB0715]	abaR	0	0	2	0	0	0	0	0	0	0	0	0	0	0	0	0	0	0	0	0	0	0	0	0	0	0	0	0	0	0	0	0	0	0	0	0	0	0	0	0	0	0	0	0	0	0	0
VFG037184(gi:523529203)_(plc)_Phospholipase_C_[Phospholipase_C_(CVF766)]_[Acinetobacter_baumannii_BJAB0715]	Acinetobacter_baumannii_BJAB0715]	plc	0	0	2	0	0	0	0	0	0	0	0	0	0	0	0	0	0	0	0	0	0	0	0	0	0	0	0	0	0	0	0	0	0	0	0	0	0	0	0	0	0	0	0	0	0	0	0
VFG037278(gi:523531901)_(barA)_ABC-type_multidrug_transport_system,_ATPase_and_permease_component_[Acinetobactin_(CVF768)]_[Acinetobacter_baumannii_BJAB0715]	Acinetobacter_baumannii_BJAB0715]	barA	0	0	2	0	0	0	0	0	0	0	0	0	0	0	0	0	0	0	0	0	0	0	0	0	0	0	0	0	0	0	0	0	0	0	0	0	0	0	0	0	0	0	0	0	0	0	0
VFG037826(gi:523532832)_(lpxC)_UDP-3-O-acyl-N-acetylglucosamine_deacetylase_[LPS_(CVF774)]_[Acinetobacter_baumannii_BJAB0715]	Acinetobacter_baumannii_BJAB0715]	lpxC	0	0	2	0	0	0	0	0	0	0	0	0	0	0	0	0	0	0	0	0	0	0	0	0	0	0	0	0	0	0	0	0	0	0	0	0	0	0	0	0	0	0	0	0	0	0	0
VFG037796(gi:523531356)_(lpxA)_Acyl-[acyl_carrier_protein]--UDP-N-acetylglucosamine_O-acyltransferase_[LPS_(CVF774)]_[Acinetobacter_baumannii_BJAB0715]	Acinetobacter_baumannii_BJAB0715]	lpxA	0	0	2	0	0	0	0	0	0	0	0	0	0	0	0	0	0	0	0	0	0	0	0	0	0	0	0	0	0	0	0	0	0	0	0	0	0	0	0	0	0	0	0	0	0	0	0
VFG038134(gi:523529230)_(BJAB0715_00109)_UDP-N-acetylmuramyl_pentapeptide_phosphotransferase/UDP-N-acetylglucosamine-1-phosphate_transferase_[Capsule_(CVF775)]_[Acinetobacter_baumannii_BJAB0715]	Acinetobacter_baumannii_BJAB0715]	BJAB0715_00109	0	0	2	0	0	0	0	0	0	0	0	0	0	0	0	0	0	0	0	0	0	0	0	0	0	0	0	0	0	0	0	0	0	0	0	0	0	0	0	0	0	0	0	0	0	0	0
VFG037616(gi:523531733)_(csuD)_P_pilus_assembly_protein,_porin_PapC_[Csu_pili_(CVF770)]_[Acinetobacter_baumannii_BJAB0715]	Acinetobacter_baumannii_BJAB0715]	csuD	0	0	2	0	0	0	0	0	0	0	0	0	0	0	0	0	0	0	0	0	0	0	0	0	0	0	0	0	0	0	0	0	0	0	0	0	0	0	0	0	0	0	0	0	0	0	0
VFG037976(gi:523529219)_(BJAB0715_00098)_Acetyltransferase_(isoleucine_patch_superfamily)_[Capsule_(CVF775)]_[Acinetobacter_baumannii_BJAB0715]	Acinetobacter_baumannii_BJAB0715]	BJAB0715_00098	0	0	2	0	0	0	0	0	0	0	0	0	0	0	0	0	0	0	0	0	0	0	0	0	0	0	0	0	0	0	0	0	0	0	0	0	0	0	0	0	0	0	0	0	0	0	0
VFG037564(gi:523531737)_(csuA/B)_putative_secreted_protein_[Csu_pili_(CVF770)]_[Acinetobacter_baumannii_BJAB0715]	Acinetobacter_baumannii_BJAB0715]	csuA/B	0	0	2	0	0	0	0	0	0	0	0	0	0	0	0	0	0	0	0	0	0	0	0	0	0	0	0	0	0	0	0	0	0	0	0	0	0	0	0	0	0	0	0	0	0	0	0
VFG037766(gi:523529591)_(lpxL)_Lauroyl/myristoyl_acyltransferase_[LPS_(CVF774)]_[Acinetobacter_baumannii_BJAB0715]	Acinetobacter_baumannii_BJAB0715]	lpxL	0	0	2	0	0	0	0	0	0	0	0	0	0	0	0	0	0	0	0	0	0	0	0	0	0	0	0	0	0	0	0	0	0	0	0	0	0	0	0	0	0	0	0	0	0	0	0
VFG037320(gi:523531905)_(entE)_Peptide_arylation_enzyme_[Acinetobactin_(CVF768)]_[Acinetobacter_baumannii_BJAB0715]	Acinetobacter_baumannii_BJAB0715]	entE	0	0	2	0	0	0	0	0	0	0	0	0	0	0	0	0	0	0	0	0	0	0	0	0	0	0	0	0	0	0	0	0	0	0	0	0	0	0	0	0	0	0	0	0	0	0	0
VFG037739(gi:523531829)_(adeH)_Outer_membrane_protein_[AdeFGH_efflux_pump/transport_autoinducer_(CVF773)]_[Acinetobacter_baumannii_BJAB0715]	Acinetobacter_baumannii_BJAB0715]	adeH	0	0	2	0	0	0	0	0	0	0	0	0	0	0	0	0	0	0	0	0	0	0	0	0	0	0	0	0	0	0	0	0	0	0	0	0	0	0	0	0	0	0	0	0	0	0	0
VFG037668(gi:523531667)_(pgaB)_putative_xylanase/chitin_deacetylase_[PNAG_(Polysaccharide_poly-N-acetylglucosamine)_(CVF772)]_[Acinetobacter_baumannii_BJAB0715]	Acinetobacter_baumannii_BJAB0715]	pgaB	0	0	2	0	0	0	0	0	0	0	0	0	0	0	0	0	0	0	0	0	0	0	0	0	0	0	0	0	0	0	0	0	0	0	0	0	0	0	0	0	0	0	0	0	0	0	0
VFG037514(gi:523530150)_(BJAB0715_01029)_hypothetical_protein_[Heme_utilization__(CVF769)]_[Acinetobacter_baumannii_BJAB0715]	Acinetobacter_baumannii_BJAB0715]	BJAB0715_01029	0	0	2	0	0	0	0	0	0	0	0	0	0	0	0	0	0	0	0	0	0	0	0	0	0	0	0	0	0	0	0	0	0	0	0	0	0	0	0	0	0	0	0	0	0	0	0
VFG037682(gi:523531666)_(pgaC)_Glycosyltransferase,_probably_involved_in_cell_wall_biogenesis_[PNAG_(Polysaccharide_poly-N-acetylglucosamine)_(CVF772)]_[Acinetobacter_baumannii_BJAB0715]	Acinetobacter_baumannii_BJAB0715]	pgaC	0	0	2	0	0	0	0	0	0	0	0	0	0	0	0	0	0	0	0	0	0	0	0	0	0	0	0	0	0	0	0	0	0	0	0	0	0	0	0	0	0	0	0	0	0	0	0
VFG038195(gi:523529278)_(abaI)_N-acyl-L-homoserine_lactone_synthetase_[Quorum_sensing_(CVF777)]_[Acinetobacter_baumannii_BJAB0715]	Acinetobacter_baumannii_BJAB0715]	abaI	0	0	2	0	0	0	0	0	0	0	0	0	0	0	0	0	0	0	0	0	0	0	0	0	0	0	0	0	0	0	0	0	0	0	0	0	0	0	0	0	0	0	0	0	0	0	0
VFG037185(gi:523531425)_(plc)_Phospholipase_C_[Phospholipase_C_(CVF766)]_[Acinetobacter_baumannii_BJAB0715]	Acinetobacter_baumannii_BJAB0715]	plc	0	0	2	0	0	0	0	0	0	0	0	0	0	0	0	0	0	0	0	0	0	0	0	0	0	0	0	0	0	0	0	0	0	0	0	0	0	0	0	0	0	0	0	0	0	0	0
VFG037856(gi:523529211)_(BJAB0715_00090)_ATPases_involved_in_chromosome_partitioning_[Capsule_(CVF775)]_[Acinetobacter_baumannii_BJAB0715]	Acinetobacter_baumannii_BJAB0715]	BJAB0715_00090	0	0	2	0	0	0	0	0	0	0	0	0	0	0	0	0	0	0	0	0	0	0	0	0	0	0	0	0	0	0	0	0	0	0	0	0	0	0	0	0	0	0	0	0	0	0	0
VFG037362(gi:523531908)_(bauA)_Outer_membrane_receptor_protein,_mostly_Fe_transport_[Acinetobactin_(CVF768)]_[Acinetobacter_baumannii_BJAB0715]	Acinetobacter_baumannii_BJAB0715]	bauA	0	0	2	0	0	0	0	0	0	0	0	0	0	0	0	0	0	0	0	0	0	0	0	0	0	0	0	0	0	0	0	0	0	0	0	0	0	0	0	0	0	0	0	0	0	0	0
VFG037264(gi:523531900)_(barB)_ABC-type_multidrug_transport_system,_ATPase_and_permease_component_[Acinetobactin_(CVF768)]_[Acinetobacter_baumannii_BJAB0715]	Acinetobacter_baumannii_BJAB0715]	barB	0	0	2	0	0	0	0	0	0	0	0	0	0	0	0	0	0	0	0	0	0	0	0	0	0	0	0	0	0	0	0	0	0	0	0	0	0	0	0	0	0	0	0	0	0	0	0
VFG037250(gi:523531899)_(basH)_putative_thioesterase_involved_in_non-ribosomal_peptide_biosynthesis_[Acinetobactin_(CVF768)]_[Acinetobacter_baumannii_BJAB0715]	Acinetobacter_baumannii_BJAB0715]	basH	0	0	2	0	0	0	0	0	0	0	0	0	0	0	0	0	0	0	0	0	0	0	0	0	0	0	0	0	0	0	0	0	0	0	0	0	0	0	0	0	0	0	0	0	0	0	0
VFG038238(gi:523529861)_(bfmS)_Signal_transduction_histidine_kinase_[Two-component_system_(CVF778)]_[Acinetobacter_baumannii_BJAB0715]	Acinetobacter_baumannii_BJAB0715]	bfmS	0	0	2	0	0	0	0	0	0	0	0	0	0	0	0	0	0	0	0	0	0	0	0	0	0	0	0	0	0	0	0	0	0	0	0	0	0	0	0	0	0	0	0	0	0	0	0
VFG037811(gi:523531003)_(lpxB)_Lipid_A_disaccharide_synthetase_[LPS_(CVF774)]_[Acinetobacter_baumannii_BJAB0715]	Acinetobacter_baumannii_BJAB0715]	lpxB	0	0	2	0	0	0	0	0	0	0	0	0	0	0	0	0	0	0	0	0	0	0	0	0	0	0	0	0	0	0	0	0	0	0	0	0	0	0	0	0	0	0	0	0	0	0	0
VFG038253(gi:523529406)_(pbpG)_D-alanyl-D-alanine_carboxypeptidase_[PbpG_(CVF779)]_[Acinetobacter_baumannii_BJAB0715]	Acinetobacter_baumannii_BJAB0715]	pbpG	0	0	2	0	0	0	0	0	0	0	0	0	0	0	0	0	0	0	0	0	0	0	0	0	0	0	0	0	0	0	0	0	0	0	0	0	0	0	0	0	0	0	0	0	0	0	0
VFG037292(gi:523531903)_(basG)_Glutamate_decarboxylase-related_PLP-dependent_protein_[Acinetobactin_(CVF768)]_[Acinetobacter_baumannii_BJAB0715]	Acinetobacter_baumannii_BJAB0715]	basG	0	0	2	0	0	0	0	0	0	0	0	0	0	0	0	0	0	0	0	0	0	0	0	0	0	0	0	0	0	0	0	0	0	0	0	0	0	0	0	0	0	0	0	0	0	0	0
VFG037418(gi:523531912)_(bauD)_ABC-type_enterochelin_transport_system,_permease_component_[Acinetobactin_(CVF768)]_[Acinetobacter_baumannii_BJAB0715]	Acinetobacter_baumannii_BJAB0715]	bauD	0	0	2	0	0	0	0	0	0	0	0	0	0	0	0	0	0	0	0	0	0	0	0	0	0	0	0	0	0	0	0	0	0	0	0	0	0	0	0	0	0	0	0	0	0	0	0
VFG037404(gi:523531911)_(bauC)_ABC-type_enterochelin_transport_system,_permease_component_[Acinetobactin_(CVF768)]_[Acinetobacter_baumannii_BJAB0715]	Acinetobacter_baumannii_BJAB0715]	bauC	0	0	2	0	0	0	0	0	0	0	0	0	0	0	0	0	0	0	0	0	0	0	0	0	0	0	0	0	0	0	0	0	0	0	0	0	0	0	0	0	0	0	0	0	0	0	0
VFG038171(gi:523529235)_(BJAB0715_00114)_UDP-glucose_4-epimerase_[Capsule_(CVF775)]_[Acinetobacter_baumannii_BJAB0715]	Acinetobacter_baumannii_BJAB0715]	BJAB0715_00114	0	0	2	0	0	0	0	0	0	0	0	0	0	0	0	0	0	0	0	0	0	0	0	0	0	0	0	0	0	0	0	0	0	0	0	0	0	0	0	0	0	0	0	0	0	0	0
VFG037432(gi:523531914)_(basB)_Non-ribosomal_peptide_synthetase_modules-related_protein_[Acinetobactin_(CVF768)]_[Acinetobacter_baumannii_BJAB0715]	Acinetobacter_baumannii_BJAB0715]	basB	0	0	2	0	0	0	0	0	0	0	0	0	0	0	0	0	0	0	0	0	0	0	0	0	0	0	0	0	0	0	0	0	0	0	0	0	0	0	0	0	0	0	0	0	0	0	0
VFG037709(gi:523531827)_(adeF)_Membrane-fusion_protein_[AdeFGH_efflux_pump/transport_autoinducer_(CVF773)]_[Acinetobacter_baumannii_BJAB0715]	Acinetobacter_baumannii_BJAB0715]	adeF	0	0	2	0	0	0	0	0	0	0	0	0	0	0	0	0	0	0	0	0	0	0	0	0	0	0	0	0	0	0	0	0	0	0	0	0	0	0	0	0	0	0	0	0	0	0	0
VFG037334(gi:523531906)_(basD)_Non-ribosomal_peptide_synthetase_modules-related_protein_[Acinetobactin_(CVF768)]_[Acinetobacter_baumannii_BJAB0715]	Acinetobacter_baumannii_BJAB0715]	basD	0	0	2	0	0	0	0	0	0	0	0	0	0	0	0	0	0	0	0	0	0	0	0	0	0	0	0	0	0	0	0	0	0	0	0	0	0	0	0	0	0	0	0	0	0	0	0
VFG037460(gi:523531916)_(bauF)_Siderophore-interacting_protein_[Acinetobactin_(CVF768)]_[Acinetobacter_baumannii_BJAB0715]	Acinetobacter_baumannii_BJAB0715]	bauF	0	0	2	0	0	0	0	0	0	0	0	0	0	0	0	0	0	0	0	0	0	0	0	0	0	0	0	0	0	0	0	0	0	0	0	0	0	0	0	0	0	0	0	0	0	0	0
VFG037695(gi:523531665)_(pgaD)_hypothetical_protein_[PNAG_(Polysaccharide_poly-N-acetylglucosamine)_(CVF772)]_[Acinetobacter_baumannii_BJAB0715]	Acinetobacter_baumannii_BJAB0715]	pgaD	0	0	2	0	0	0	0	0	0	0	0	0	0	0	0	0	0	0	0	0	0	0	0	0	0	0	0	0	0	0	0	0	0	0	0	0	0	0	0	0	0	0	0	0	0	0	0
VFG037946(gi:523529217)_(BJAB0715_00096)_UDP-N-acetylglucosamine_2-epimerase_[Capsule_(CVF775)]_[Acinetobacter_baumannii_BJAB0715]	Acinetobacter_baumannii_BJAB0715]	BJAB0715_00096	0	0	2	0	0	0	0	0	0	0	0	0	0	0	0	0	0	0	0	0	0	0	0	0	0	0	0	0	0	0	0	0	0	0	0	0	0	0	0	0	0	0	0	0	0	0	0
VFG038223(gi:523529860)_(bfmR)_Response_regulators_consisting_of_a_CheY-like_receiver_domain_and_a_winged-helix_DNA-binding_domain_protein_[Two-component_system_(CVF778)]_[Acinetobacter_baumannii_BJAB0715]	Acinetobacter_baumannii_BJAB0715]	bfmR	0	0	2	0	0	0	0	0	0	0	0	0	0	0	0	0	0	0	0	0	0	0	0	0	0	0	0	0	0	0	0	0	0	0	0	0	0	0	0	0	0	0	0	0	0	0	0
VFG037506(gi:523530149)_(BJAB0715_01028)_hypothetical_protein_[Heme_utilization__(CVF769)]_[Acinetobacter_baumannii_BJAB0715]	Acinetobacter_baumannii_BJAB0715]	BJAB0715_01028	0	0	2	0	0	0	0	0	0	0	0	0	0	0	0	0	0	0	0	0	0	0	0	0	0	0	0	0	0	0	0	0	0	0	0	0	0	0	0	0	0	0	0	0	0	0	0
VFG037446(gi:523531915)_(basA)_Non-ribosomal_peptide_synthetase_modules-related_protein_[Acinetobactin_(CVF768)]_[Acinetobacter_baumannii_BJAB0715]	Acinetobacter_baumannii_BJAB0715]	basA	0	0	2	0	0	0	0	0	0	0	0	0	0	0	0	0	0	0	0	0	0	0	0	0	0	0	0	0	0	0	0	0	0	0	0	0	0	0	0	0	0	0	0	0	0	0	0
VFG037222(gi:523531897)_(basJ)_Isochorismate_synthase_[Acinetobactin_(CVF768)]_[Acinetobacter_baumannii_BJAB0715]	Acinetobacter_baumannii_BJAB0715]	basJ	0	0	2	0	0	0	0	0	0	0	0	0	0	0	0	0	0	0	0	0	0	0	0	0	0	0	0	0	0	0	0	0	0	0	0	0	0	0	0	0	0	0	0	0	0	0	0
VFG037522(gi:523530151)_(BJAB0715_01030)_hypothetical_protein_[Heme_utilization__(CVF769)]_[Acinetobacter_baumannii_BJAB0715]	Acinetobacter_baumannii_BJAB0715]	BJAB0715_01030	0	0	2	0	0	0	0	0	0	0	0	0	0	0	0	0	0	0	0	0	0	0	0	0	0	0	0	0	0	0	0	0	0	0	0	0	0	0	0	0	0	0	0	0	0	0	0
VFG037781(gi:523529590)_(lpsB)_Glycosyltransferase_[LPS_(CVF774)]_[Acinetobacter_baumannii_BJAB0715]	Acinetobacter_baumannii_BJAB0715]	lpsB	0	0	2	0	0	0	0	0	0	0	0	0	0	0	0	0	0	0	0	0	0	0	0	0	0	0	0	0	0	0	0	0	0	0	0	0	0	0	0	0	0	0	0	0	0	0	0
VFG037654(gi:523531668)_(pgaA)_hypothetical_protein_[PNAG_(Polysaccharide_poly-N-acetylglucosamine)_(CVF772)]_[Acinetobacter_baumannii_BJAB0715]	Acinetobacter_baumannii_BJAB0715]	pgaA	0	0	2	0	0	0	0	0	0	0	0	0	0	0	0	0	0	0	0	0	0	0	0	0	0	0	0	0	0	0	0	0	0	0	0	0	0	0	0	0	0	0	0	0	0	0	0
VFG037577(gi:523531736)_(csuA)_hypothetical_protein_[Csu_pili_(CVF770)]_[Acinetobacter_baumannii_BJAB0715]	Acinetobacter_baumannii_BJAB0715]	csuA	0	0	2	0	0	0	0	0	0	0	0	0	0	0	0	0	0	0	0	0	0	0	0	0	0	0	0	0	0	0	0	0	0	0	0	0	0	0	0	0	0	0	0	0	0	0	0
VFG037530(gi:523530152)_(hemO)_Heme_oxygenase_[Heme_utilization__(CVF769)]_[Acinetobacter_baumannii_BJAB0715]	Acinetobacter_baumannii_BJAB0715]	hemO	0	0	2	0	0	0	0	0	0	0	0	0	0	0	0	0	0	0	0	0	0	0	0	0	0	0	0	0	0	0	0	0	0	0	0	0	0	0	0	0	0	0	0	0	0	0	0
VFG037236(gi:523531898)_(basI)_hypothetical_protein_[Acinetobactin_(CVF768)]_[Acinetobacter_baumannii_BJAB0715]	Acinetobacter_baumannii_BJAB0715]	basI	0	0	2	0	0	0	0	0	0	0	0	0	0	0	0	0	0	0	0	0	0	0	0	0	0	0	0	0	0	0	0	0	0	0	0	0	0	0	0	0	0	0	0	0	0	0	0
VFG037629(gi:523531732)_(csuE)_putative_secreted_protein_[Csu_pili_(CVF770)]_[Acinetobacter_baumannii_BJAB0715]	Acinetobacter_baumannii_BJAB0715]	csuE	0	0	2	0	0	0	0	0	0	0	0	0	0	0	0	0	0	0	0	0	0	0	0	0	0	0	0	0	0	0	0	0	0	0	0	0	0	0	0	0	0	0	0	0	0	0	0
VFG037538(gi:523530153)_(BJAB0715_01032)_hypothetical_protein_[Heme_utilization__(CVF769)]_[Acinetobacter_baumannii_BJAB0715]	Acinetobacter_baumannii_BJAB0715]	BJAB0715_01032	0	0	2	0	0	0	0	0	0	0	0	0	0	0	0	0	0	0	0	0	0	0	0	0	0	0	0	0	0	0	0	0	0	0	0	0	0	0	0	0	0	0	0	0	0	0	0
VFG037590(gi:523531735)_(csuB)_hypothetical_protein_[Csu_pili_(CVF770)]_[Acinetobacter_baumannii_BJAB0715]	Acinetobacter_baumannii_BJAB0715]	csuB	0	0	2	0	0	0	0	0	0	0	0	0	0	0	0	0	0	0	0	0	0	0	0	0	0	0	0	0	0	0	0	0	0	0	0	0	0	0	0	0	0	0	0	0	0	0	0
VFG037491(gi:523530147)_(BJAB0715_01026)_Fe2+-dicitrate_sensor,_membrane_component_[Heme_utilization__(CVF769)]_[Acinetobacter_baumannii_BJAB0715]	Acinetobacter_baumannii_BJAB0715]	BJAB0715_01026	0	0	2	0	0	0	0	0	0	0	0	0	0	0	0	0	0	0	0	0	0	0	0	0	0	0	0	0	0	0	0	0	0	0	0	0	0	0	0	0	0	0	0	0	0	0	0
VFG037390(gi:523531910)_(bauE)_ABC-type_enterochelin_transport_system,_ATPase_component_[Acinetobactin_(CVF768)]_[Acinetobacter_baumannii_BJAB0715]	Acinetobacter_baumannii_BJAB0715]	bauE	0	0	2	0	0	0	0	0	0	0	0	0	0	0	0	0	0	0	0	0	0	0	0	0	0	0	0	0	0	0	0	0	0	0	0	0	0	0	0	0	0	0	0	0	0	0	0
VFG037603(gi:523531734)_(csuC)_P_pilus_assembly_protein,_chaperone_PapD_[Csu_pili_(CVF770)]_[Acinetobacter_baumannii_BJAB0715]	Acinetobacter_baumannii_BJAB0715]	csuC	0	0	2	0	0	0	0	0	0	0	0	0	0	0	0	0	0	0	0	0	0	0	0	0	0	0	0	0	0	0	0	0	0	0	0	0	0	0	0	0	0	0	0	0	0	0	0
VFG038180(gi:523532361)_(ompA)_Outer_membrane_protein-related_peptidoglycan-associated_(lipo)protein_[Outer_membrane_protein_(CVF776)]_[Acinetobacter_baumannii_BJAB0715]	Acinetobacter_baumannii_BJAB0715]	ompA	0	0	2	0	0	0	0	0	0	0	0	0	0	0	0	0	0	0	0	0	0	0	0	0	0	0	0	0	0	0	0	0	0	0	0	0	0	0	0	0	0	0	0	0	0	0	0
VFG037550(gi:523530154)_(BJAB0715_01033)_hypothetical_protein_[Heme_utilization__(CVF769)]_[Acinetobacter_baumannii_BJAB0715]	Acinetobacter_baumannii_BJAB0715]	BJAB0715_01033	0	0	2	0	0	0	0	0	0	0	0	0	0	0	0	0	0	0	0	0	0	0	0	0	0	0	0	0	0	0	0	0	0	0	0	0	0	0	0	0	0	0	0	0	0	0	0
VFG037433(gi:523527920)_(basB)_Non-ribosomal_peptide_synthetase_modules-related_protein_[Acinetobactin_(CVF768)]_[Acinetobacter_baumannii_BJAB0868]	Acinetobacter_baumannii_BJAB0868]	basB	0	0	2	0	0	0	0	0	0	0	0	0	0	0	0	0	0	0	0	0	0	0	0	0	0	0	0	0	0	0	0	0	0	0	0	0	0	0	0	0	0	0	0	0	0	0	0
VFG037902(gi:523525387)_(BJAB0868_00091)_Periplasmic_protein_involved_in_polysaccharide_export_[Capsule_(CVF775)]_[Acinetobacter_baumannii_BJAB0868]	Acinetobacter_baumannii_BJAB0868]	BJAB0868_00091	0	0	2	0	0	0	0	0	0	0	0	0	0	0	0	0	0	0	0	0	0	0	0	0	0	0	0	0	0	0	0	0	0	0	0	0	0	0	0	0	0	0	0	0	0	0	0
VFG038007(gi:523525394)_(BJAB0868_00098)_Nucleoside-diphosphate-sugar_pyrophosphorylase_involved_in_lipopolysaccharide_biosynthesis/translation_initiation_factor_2B,_gamma/epsilon_subunits_(eIF-2Bgamma/eIF-2Bepsilon)_[Capsule_(CVF775)]_[Acinetobacter_baumannii_BJAB0868]	Acinetobacter_baumannii_BJAB0868]	BJAB0868_00098	0	0	2	0	0	0	0	0	0	0	0	0	0	0	0	0	0	0	0	0	0	0	0	0	0	0	0	0	0	0	0	0	0	0	0	0	0	0	0	0	0	0	0	0	0	0	0
VFG037643(gi:523528206)_(bap)_hypothetical_protein_[Biofilm-associated_protein_(CVF771)]_[Acinetobacter_baumannii_BJAB0868]	Acinetobacter_baumannii_BJAB0868]	bap	0	0	2	0	0	0	0	0	0	0	0	0	0	0	0	0	0	0	0	0	0	0	0	0	0	0	0	0	0	0	0	0	0	0	0	0	0	0	0	0	0	0	0	0	0	0	0
VFG038052(gi:523525397)_(BJAB0868_00101)_hypothetical_protein_[Capsule_(CVF775)]_[Acinetobacter_baumannii_BJAB0868]	Acinetobacter_baumannii_BJAB0868]	BJAB0868_00101	0	0	2	0	0	0	0	0	0	0	0	0	0	0	0	0	0	0	0	0	0	0	0	0	0	0	0	0	0	0	0	0	0	0	0	0	0	0	0	0	0	0	0	0	0	0	0
VFG037725(gi:523527837)_(adeG)_Cation/multidrug_efflux_pump_[AdeFGH_efflux_pump/transport_autoinducer_(CVF773)]_[Acinetobacter_baumannii_BJAB0868]	Acinetobacter_baumannii_BJAB0868]	adeG	0	0	2	0	0	0	0	0	0	0	0	0	0	0	0	0	0	0	0	0	0	0	0	0	0	0	0	0	0	0	0	0	0	0	0	0	0	0	0	0	0	0	0	0	0	0	0
VFG037186(gi:523525377)_(plc)_Phospholipase_C_[Phospholipase_C_(CVF766)]_[Acinetobacter_baumannii_BJAB0868]	Acinetobacter_baumannii_BJAB0868]	plc	0	0	2	0	0	0	0	0	0	0	0	0	0	0	0	0	0	0	0	0	0	0	0	0	0	0	0	0	0	0	0	0	0	0	0	0	0	0	0	0	0	0	0	0	0	0	0
VFG037499(gi:523526317)_(BJAB0868_01023)_Outer_membrane_receptor_protein,_mostly_Fe_transport_[Heme_utilization__(CVF769)]_[Acinetobacter_baumannii_BJAB0868]	Acinetobacter_baumannii_BJAB0868]	BJAB0868_01023	0	0	2	0	0	0	0	0	0	0	0	0	0	0	0	0	0	0	0	0	0	0	0	0	0	0	0	0	0	0	0	0	0	0	0	0	0	0	0	0	0	0	0	0	0	0	0
VFG037857(gi:523525384)_(BJAB0868_00088)_ATPases_involved_in_chromosome_partitioning_[Capsule_(CVF775)]_[Acinetobacter_baumannii_BJAB0868]	Acinetobacter_baumannii_BJAB0868]	BJAB0868_00088	0	0	2	0	0	0	0	0	0	0	0	0	0	0	0	0	0	0	0	0	0	0	0	0	0	0	0	0	0	0	0	0	0	0	0	0	0	0	0	0	0	0	0	0	0	0	0
VFG037827(gi:523528868)_(lpxC)_UDP-3-O-acyl-N-acetylglucosamine_deacetylase_[LPS_(CVF774)]_[Acinetobacter_baumannii_BJAB0868]	Acinetobacter_baumannii_BJAB0868]	lpxC	0	0	2	0	0	0	0	0	0	0	0	0	0	0	0	0	0	0	0	0	0	0	0	0	0	0	0	0	0	0	0	0	0	0	0	0	0	0	0	0	0	0	0	0	0	0	0
VFG037782(gi:523525784)_(lpsB)_Glycosyltransferase_[LPS_(CVF774)]_[Acinetobacter_baumannii_BJAB0868]	Acinetobacter_baumannii_BJAB0868]	lpsB	0	0	2	0	0	0	0	0	0	0	0	0	0	0	0	0	0	0	0	0	0	0	0	0	0	0	0	0	0	0	0	0	0	0	0	0	0	0	0	0	0	0	0	0	0	0	0
VFG038110(gi:523525401)_(BJAB0868_00105)_Sugar_transferases_involved_in_lipopolysaccharide_synthesis_[Capsule_(CVF775)]_[Acinetobacter_baumannii_BJAB0868]	Acinetobacter_baumannii_BJAB0868]	BJAB0868_00105	0	0	2	0	0	0	0	0	0	0	0	0	0	0	0	0	0	0	0	0	0	0	0	0	0	0	0	0	0	0	0	0	0	0	0	0	0	0	0	0	0	0	0	0	0	0	0
VFG037630(gi:523527747)_(csuE)_putative_secreted_protein_[Csu_pili_(CVF770)]_[Acinetobacter_baumannii_BJAB0868]	Acinetobacter_baumannii_BJAB0868]	csuE	0	0	2	0	0	0	0	0	0	0	0	0	0	0	0	0	0	0	0	0	0	0	0	0	0	0	0	0	0	0	0	0	0	0	0	0	0	0	0	0	0	0	0	0	0	0	0
VFG037872(gi:523525385)_(BJAB0868_00089)_Protein-tyrosine-phosphatase_[Capsule_(CVF775)]_[Acinetobacter_baumannii_BJAB0868]	Acinetobacter_baumannii_BJAB0868]	BJAB0868_00089	0	0	2	0	0	0	0	0	0	0	0	0	0	0	0	0	0	0	0	0	0	0	0	0	0	0	0	0	0	0	0	0	0	0	0	0	0	0	0	0	0	0	0	0	0	0	0
VFG037887(gi:523525386)_(BJAB0868_00090)_Periplasmic_protein_involved_in_polysaccharide_export_[Capsule_(CVF775)]_[Acinetobacter_baumannii_BJAB0868]	Acinetobacter_baumannii_BJAB0868]	BJAB0868_00090	0	0	2	0	0	0	0	0	0	0	0	0	0	0	0	0	0	0	0	0	0	0	0	0	0	0	0	0	0	0	0	0	0	0	0	0	0	0	0	0	0	0	0	0	0	0	0
VFG037726(gi:469822480)_(adeG)_RND_cation/multidrug_efflux_pump_[AdeFGH_efflux_pump/transport_autoinducer_(CVF773)]_[Acinetobacter_baumannii_D1279779]	Acinetobacter_baumannii_D1279779]	adeG	7	0	2	0	0	0	0	0	0	0	0	0	0	0	0	0	0	0	0	0	0	0	0	0	0	0	0	0	0	0	0	0	0	0	0	0	0	0	0	0	0	0	0	0	0	0	0
VFG037993(gi:469820240)_(fnlA)_UDP-N-acetylglucosamine_4,6-dehydratase_[Capsule_(CVF775)]_[Acinetobacter_baumannii_D1279779]	Acinetobacter_baumannii_D1279779]	fnlA	2	0	2	0	0	0	0	0	0	0	0	0	0	0	0	0	0	0	0	0	0	0	0	0	0	1	0	0	0	0	0	0	0	0	0	0	0	0	0	0	0	0	0	0	0	0	0
VFG037903(gi:469820234)_(ugd)_UDP-glucose_6-dehydrogenase_[Capsule_(CVF775)]_[Acinetobacter_baumannii_D1279779]	Acinetobacter_baumannii_D1279779]	ugd	1	0	2	0	0	0	0	0	0	0	0	0	0	0	0	0	0	0	0	0	0	0	0	0	0	0	0	0	0	0	0	0	0	0	0	0	0	0	0	0	0	0	0	0	0	0	0
VFG037918(gi:469820235)_(galE)_UDP-glucose_4-epimerase_[Capsule_(CVF775)]_[Acinetobacter_baumannii_D1279779]	Acinetobacter_baumannii_D1279779]	galE	1	0	2	0	0	0	0	0	0	0	0	0	1	0	0	0	0	0	0	0	0	0	0	0	0	0	0	0	0	0	0	0	0	0	0	0	0	0	0	0	0	0	0	0	0	0	0
VFG037656(gi:469822337)_(pgaA)_biofilm_PGA_outer_membrane_secretin_PgaA_[PNAG_(Polysaccharide_poly-N-acetylglucosamine)_(CVF772)]_[Acinetobacter_baumannii_D1279779]	Acinetobacter_baumannii_D1279779]	pgaA	0	0	2	0	0	0	0	0	0	0	0	0	0	0	0	0	0	0	0	0	0	0	0	0	0	0	0	0	0	0	0	0	0	0	0	0	0	0	0	0	0	0	0	0	0	0	0
VFG037252(gi:469822546)_(basH)_acinetobactin_biosynthesis_protein_[Acinetobactin_(CVF768)]_[Acinetobacter_baumannii_D1279779]	Acinetobacter_baumannii_D1279779]	basH	0	0	2	0	0	0	0	0	0	0	0	0	0	0	0	0	0	0	0	0	0	0	0	0	0	0	0	0	0	0	0	0	0	0	0	0	0	0	0	0	0	0	0	0	0	0	0
VFG038197(gi:469820297)_(abaI)_putative_N-acylhomoserine_lactone_synthase_[Quorum_sensing_(CVF777)]_[Acinetobacter_baumannii_D1279779]	Acinetobacter_baumannii_D1279779]	abaI	0	0	2	0	0	0	0	0	0	0	0	0	0	0	0	0	0	0	0	0	0	0	0	0	0	0	0	0	0	0	0	0	0	0	0	0	0	0	0	0	0	0	0	0	0	0	0
VFG037858(gi:469820231)_(wzc)_tyrosine-protein_kinase_[Capsule_(CVF775)]_[Acinetobacter_baumannii_D1279779]	Acinetobacter_baumannii_D1279779]	wzc	0	0	2	0	0	0	0	0	0	0	0	0	0	0	0	0	0	0	0	0	0	0	0	0	0	0	0	0	0	0	0	0	0	0	0	0	0	0	0	0	0	0	0	0	0	0	0
VFG038240(gi:469820883)_(bfmS)_sensory_histidine_kinase_in_two-component_regulatory_system_with_RstA_[Two-component_system_(CVF778)]_[Acinetobacter_baumannii_D1279779]	Acinetobacter_baumannii_D1279779]	bfmS	0	0	2	0	0	0	0	0	0	0	0	0	0	0	0	0	0	0	0	0	0	0	0	0	0	0	0	0	0	0	0	0	0	0	0	0	0	0	0	0	0	0	0	0	0	0	0
VFG037280(gi:469822548)_(barA)_ABC_transporter,_ATP-binding_protein_[Acinetobactin_(CVF768)]_[Acinetobacter_baumannii_D1279779]	Acinetobacter_baumannii_D1279779]	barA	0	0	2	0	0	0	0	0	0	0	0	0	0	0	0	0	0	0	0	0	0	0	0	0	0	0	0	0	0	0	0	0	0	0	0	0	0	0	0	0	0	0	0	0	0	0	0
VFG037294(gi:469822550)_(basG)_histidine_decarboxylase_[Acinetobactin_(CVF768)]_[Acinetobacter_baumannii_D1279779]	Acinetobacter_baumannii_D1279779]	basG	0	0	2	0	0	0	0	0	0	0	0	0	0	0	0	0	0	0	0	0	0	0	0	0	0	0	0	0	0	0	0	0	0	0	0	0	0	0	0	0	0	0	0	0	0	0	0
VFG037618(gi:469822387)_(csuD)_CsuD_[Csu_pili_(CVF770)]_[Acinetobacter_baumannii_D1279779]	Acinetobacter_baumannii_D1279779]	csuD	0	0	2	0	0	0	0	0	0	0	0	0	0	0	0	0	0	0	0	0	0	0	0	0	0	0	0	0	0	0	0	0	0	0	0	0	0	0	0	0	0	0	0	0	0	0	0
VFG037336(gi:469822553)_(basD)_acinetobactin_biosynthesis_protein_[Acinetobactin_(CVF768)]_[Acinetobacter_baumannii_D1279779]	Acinetobacter_baumannii_D1279779]	basD	0	0	2	0	0	0	0	0	0	0	0	0	0	0	0	0	0	0	0	0	0	0	0	0	0	0	0	0	0	0	0	0	0	0	0	0	0	0	0	0	0	0	0	0	0	0	0
VFG038255(gi:469820403)_(pbpG)_D-alanyl-D-alanine_endopeptidase_[PbpG_(CVF779)]_[Acinetobacter_baumannii_D1279779]	Acinetobacter_baumannii_D1279779]	pbpG	0	0	2	0	0	0	0	0	0	0	0	0	0	0	0	0	0	0	0	0	0	0	0	0	0	0	0	0	0	0	0	0	0	0	0	0	0	0	0	0	0	0	0	0	0	0	0
VFG037798(gi:469822167)_(lpxA)_UDP-N-_acetylglucosamine_O-acyltransferase_[LPS_(CVF774)]_[Acinetobacter_baumannii_D1279779]	Acinetobacter_baumannii_D1279779]	lpxA	0	0	2	0	0	0	0	0	0	0	0	0	0	0	0	0	0	0	0	0	0	0	0	0	0	0	0	0	0	0	0	0	0	0	0	0	0	0	0	0	0	0	0	0	0	0	0
VFG037684(gi:469822335)_(pgaC)_biofilm_PGA_synthesis_N-glycosyltransferase_PgaC_[PNAG_(Polysaccharide_poly-N-acetylglucosamine)_(CVF772)]_[Acinetobacter_baumannii_D1279779]	Acinetobacter_baumannii_D1279779]	pgaC	0	0	2	0	0	0	0	0	0	0	0	0	0	0	0	0	0	0	0	0	0	0	0	0	0	0	0	0	0	0	0	0	0	0	0	0	0	0	0	0	0	0	0	0	0	0	0
VFG038008(gi:469820241)_(ABD1_00590)_capsular_polysaccharide_biosynthesis_protein_[Capsule_(CVF775)]_[Acinetobacter_baumannii_D1279779]	Acinetobacter_baumannii_D1279779]	ABD1_00590	0	0	2	0	0	0	0	0	0	0	0	0	0	0	0	0	0	0	0	0	0	0	0	0	0	0	0	0	0	0	0	0	0	0	0	0	0	0	0	0	0	0	0	0	0	0	0
VFG037933(gi:469820236)_(ABD1_00540)_polysaccharide_biosynthesis_protein_[Capsule_(CVF775)]_[Acinetobacter_baumannii_D1279779]	Acinetobacter_baumannii_D1279779]	ABD1_00540	0	0	2	0	0	0	0	0	0	0	0	0	0	0	0	0	0	0	0	0	0	0	0	0	0	0	0	0	0	0	0	0	0	0	0	0	0	0	0	0	0	0	0	0	0	0	0
VFG037963(gi:469820238)_(ABD1_00560)_hypothetical_protein_[Capsule_(CVF775)]_[Acinetobacter_baumannii_D1279779]	Acinetobacter_baumannii_D1279779]	ABD1_00560	0	0	2	0	0	0	0	0	0	0	0	0	0	0	0	0	0	0	0	0	0	0	0	0	0	0	0	0	0	0	0	0	0	0	0	0	0	0	0	0	0	0	0	0	0	0	0
VFG037266(gi:469822547)_(barB)_ABC_transporter_[Acinetobactin_(CVF768)]_[Acinetobacter_baumannii_D1279779]	Acinetobacter_baumannii_D1279779]	barB	0	0	2	0	0	0	0	0	0	0	0	0	0	0	0	0	0	0	0	0	0	0	0	0	0	0	0	0	0	0	0	0	0	0	0	0	0	0	0	0	0	0	0	0	0	0	0
VFG037741(gi:469822481)_(adeH)_efflux_pump_outer_membrane_protein_[AdeFGH_efflux_pump/transport_autoinducer_(CVF773)]_[Acinetobacter_baumannii_D1279779]	Acinetobacter_baumannii_D1279779]	adeH	0	0	2	0	0	0	0	0	0	0	0	0	0	0	0	0	0	0	0	0	0	0	0	0	0	0	0	0	0	0	0	0	0	0	0	0	0	0	0	0	0	0	0	0	0	0	0
VFG037188(gi:469820224)_(plc)_phospholipase_C_4_precursor_[Phospholipase_C_(CVF766)]_[Acinetobacter_baumannii_D1279779]	Acinetobacter_baumannii_D1279779]	plc	0	0	2	0	0	0	0	0	0	0	0	0	0	0	0	0	0	0	0	0	0	0	0	0	0	0	0	0	0	0	0	0	0	0	0	0	0	0	0	0	0	0	0	0	0	0	0
VFG037364(gi:469822555)_(bauA)_ferric_acinetobactin_receptor_[Acinetobactin_(CVF768)]_[Acinetobacter_baumannii_D1279779]	Acinetobacter_baumannii_D1279779]	bauA	0	0	2	0	0	0	0	0	0	0	0	0	0	0	0	0	0	0	0	0	0	0	0	0	0	0	0	0	0	0	0	0	0	0	0	0	0	0	0	0	0	0	0	0	0	0	0
VFG037189(gi:469822227)_(plc)_phospholipase_C_[Phospholipase_C_(CVF766)]_[Acinetobacter_baumannii_D1279779]	Acinetobacter_baumannii_D1279779]	plc	0	0	2	0	0	0	0	0	0	0	0	0	0	0	0	0	0	0	0	0	0	0	0	0	0	0	0	0	0	0	0	0	0	0	0	0	0	0	0	0	0	0	0	0	0	0	0
VFG037209(gi:469823054)_(plcD)_phospholipase_D_protein_[Phospholipase_D_(CVF767)]_[Acinetobacter_baumannii_D1279779]	Acinetobacter_baumannii_D1279779]	plcD	0	0	2	0	0	0	0	0	0	0	0	0	0	0	0	0	0	0	0	0	0	0	0	0	0	0	0	0	0	0	0	0	0	0	0	0	0	0	0	0	0	0	0	0	0	0	0
VFG037392(gi:469822557)_(bauE)_ferric_acinetobactin_transport_system_ATP-binding_protein_[Acinetobactin_(CVF768)]_[Acinetobacter_baumannii_D1279779]	Acinetobacter_baumannii_D1279779]	bauE	0	0	2	0	0	0	0	0	0	0	0	0	0	0	0	0	0	0	0	0	0	0	0	0	0	0	0	0	0	0	0	0	0	0	0	0	0	0	0	0	0	0	0	0	0	0	0
VFG037711(gi:469822479)_(adeF)_RND_efflux_transporter_[AdeFGH_efflux_pump/transport_autoinducer_(CVF773)]_[Acinetobacter_baumannii_D1279779]	Acinetobacter_baumannii_D1279779]	adeF	0	0	2	0	0	0	0	0	0	0	0	0	0	0	0	0	0	0	0	0	0	0	0	0	0	0	0	0	0	0	0	0	0	0	0	0	0	0	0	0	0	0	0	0	0	0	0
VFG037350(gi:469822554)_(basC)_lysine/ornithine_N-monooxygenase_[Acinetobactin_(CVF768)]_[Acinetobacter_baumannii_D1279779]	Acinetobacter_baumannii_D1279779]	basC	0	0	2	0	0	0	0	0	0	0	0	0	0	0	0	0	0	0	0	0	0	0	0	0	0	0	0	0	0	0	0	0	0	0	0	0	0	0	0	0	0	0	0	0	0	0	0
VFG037448(gi:469822561)_(basA)_acinetobactin_biosynthesis_protein_[Acinetobactin_(CVF768)]_[Acinetobacter_baumannii_D1279779]	Acinetobacter_baumannii_D1279779]	basA	0	0	2	0	0	0	0	0	0	0	0	0	0	0	0	0	0	0	0	0	0	0	0	0	0	0	0	0	0	0	0	0	0	0	0	0	0	0	0	0	0	0	0	0	0	0	0
VFG037434(gi:469822560)_(basB)_non-ribosomal_peptide_synthase_[Acinetobactin_(CVF768)]_[Acinetobacter_baumannii_D1279779]	Acinetobacter_baumannii_D1279779]	basB	0	0	2	0	0	0	0	0	0	0	0	0	0	0	0	0	0	0	0	0	0	0	0	0	0	0	0	0	0	0	0	0	0	0	0	0	0	0	0	0	0	0	0	0	0	0	0
VFG038211(gi:469820299)_(abaR)_transcriptional_regulator,_LuxR_family_[Quorum_sensing_(CVF777)]_[Acinetobacter_baumannii_D1279779]	Acinetobacter_baumannii_D1279779]	abaR	0	0	2	0	0	0	0	0	0	0	0	0	0	0	0	0	0	0	0	0	0	0	0	0	0	0	0	0	0	0	0	0	0	0	0	0	0	0	0	0	0	0	0	0	0	0	0
VFG037322(gi:469822552)_(entE)_enterobactin_synthase_subunit_E_[Acinetobactin_(CVF768)]_[Acinetobacter_baumannii_D1279779]	Acinetobacter_baumannii_D1279779]	entE	0	0	2	0	0	0	0	0	0	0	0	0	0	0	0	0	0	0	0	0	0	0	0	0	0	0	0	0	0	0	0	0	0	0	0	0	0	0	0	0	0	0	0	0	0	0	0
VFG037978(gi:469820239)_(ABD1_00570)_glycosyl_transferase_[Capsule_(CVF775)]_[Acinetobacter_baumannii_D1279779]	Acinetobacter_baumannii_D1279779]	ABD1_00570	0	0	2	0	0	0	0	0	0	0	0	0	0	0	0	0	0	0	0	0	0	0	0	0	0	0	0	0	0	0	0	0	0	0	0	0	0	0	0	0	0	0	0	0	0	0	0
VFG037888(gi:469820233)_(wza)_polysaccharide_export_lipoprotein_[Capsule_(CVF775)]_[Acinetobacter_baumannii_D1279779]	Acinetobacter_baumannii_D1279779]	wza	0	0	2	0	0	0	0	0	0	0	0	0	0	0	0	0	0	0	0	0	0	0	0	0	0	0	0	0	0	0	0	0	0	0	0	0	0	0	0	0	0	0	0	0	0	0	0
VFG037462(gi:469822562)_(bauF)_siderophore-interacting_protein_[Acinetobactin_(CVF768)]_[Acinetobacter_baumannii_D1279779]	Acinetobacter_baumannii_D1279779]	bauF	0	0	2	0	0	0	0	0	0	0	0	0	0	0	0	0	0	0	0	0	0	0	0	0	0	0	0	0	0	0	0	0	0	0	0	0	0	0	0	0	0	0	0	0	0	0	0
VFG037406(gi:469822558)_(bauC)_ferric_acinetobactin_transport_system_ATP-binding_protein_[Acinetobactin_(CVF768)]_[Acinetobacter_baumannii_D1279779]	Acinetobacter_baumannii_D1279779]	bauC	0	0	2	0	0	0	0	0	0	0	0	0	0	0	0	0	0	0	0	0	0	0	0	0	0	0	0	0	0	0	0	0	0	0	0	0	0	0	0	0	0	0	0	0	0	0	0
VFG037552(gi:469821051)_(ABD1_08700)_hypothetical_protein_[Heme_utilization__(CVF769)]_[Acinetobacter_baumannii_D1279779]	Acinetobacter_baumannii_D1279779]	ABD1_08700	0	0	2	0	0	0	0	0	0	0	0	0	0	0	0	0	0	0	0	0	0	0	0	0	0	0	0	0	0	0	0	0	0	0	0	0	0	0	0	0	0	0	0	0	0	0	0
VFG038038(gi:469820243)_(ABD1_00610)_glycosyltransferase_[Capsule_(CVF775)]_[Acinetobacter_baumannii_D1279779]	Acinetobacter_baumannii_D1279779]	ABD1_00610	0	0	2	0	0	0	0	0	0	0	0	0	0	0	0	0	0	0	0	0	0	0	0	0	0	0	0	0	0	0	0	0	0	0	0	0	0	0	0	0	0	0	0	0	0	0	0
VFG037378(gi:469822556)_(bauB)_ferric_acinetobactin_binding_protein_[Acinetobactin_(CVF768)]_[Acinetobacter_baumannii_D1279779]	Acinetobacter_baumannii_D1279779]	bauB	0	0	2	0	0	0	0	0	0	0	0	0	0	0	0	0	0	0	0	0	0	0	0	0	0	0	0	0	0	0	0	0	0	0	0	0	0	0	0	0	0	0	0	0	0	0	0
VFG037670(gi:469822336)_(pgaB)_biofilm_PGA_synthesis_deacetylase_PgaB_[PNAG_(Polysaccharide_poly-N-acetylglucosamine)_(CVF772)]_[Acinetobacter_baumannii_D1279779]	Acinetobacter_baumannii_D1279779]	pgaB	0	0	2	0	0	0	0	0	0	0	0	0	0	0	0	0	0	0	0	0	0	0	0	0	0	0	0	0	0	0	0	0	0	0	0	0	0	0	0	0	0	0	0	0	0	0	0
VFG037813(gi:469821831)_(lpxB)_lipid-A-disaccharide_synthase_[LPS_(CVF774)]_[Acinetobacter_baumannii_D1279779]	Acinetobacter_baumannii_D1279779]	lpxB	0	0	2	0	0	0	0	0	0	0	0	0	0	0	0	0	0	0	0	0	0	0	0	0	0	0	0	0	0	0	0	0	0	0	0	0	0	0	0	0	0	0	0	0	0	0	0
VFG037308(gi:469822551)_(basF)_isochorismatase_[Acinetobactin_(CVF768)]_[Acinetobacter_baumannii_D1279779]	Acinetobacter_baumannii_D1279779]	basF	0	0	2	0	0	0	0	0	0	0	0	0	0	0	0	0	0	0	0	0	0	0	0	0	0	0	0	0	0	0	0	0	0	0	0	0	0	0	0	0	0	0	0	0	0	0	0
VFG037753(gi:469822737)_(lpxM)_lipid_A_biosynthesis_lauroyl_acyltransferase_[LPS_(CVF774)]_[Acinetobacter_baumannii_D1279779]	Acinetobacter_baumannii_D1279779]	lpxM	0	0	2	0	0	0	0	0	0	0	0	0	0	0	0	0	0	0	0	0	0	0	0	0	0	0	0	0	0	0	0	0	0	0	0	0	0	0	0	0	0	0	0	0	0	0	0
VFG037783(gi:469820583)_(lpsB)_glycosyltransferase_[LPS_(CVF774)]_[Acinetobacter_baumannii_D1279779]	Acinetobacter_baumannii_D1279779]	lpsB	0	0	2	0	0	0	0	0	0	0	0	0	0	0	0	0	0	0	0	0	0	0	0	0	0	0	0	0	0	0	0	0	0	0	0	0	0	0	0	0	0	0	0	0	0	0	0
VFG037605(gi:469822388)_(csuC)_CsuC_[Csu_pili_(CVF770)]_[Acinetobacter_baumannii_D1279779]	Acinetobacter_baumannii_D1279779]	csuC	0	0	2	0	0	0	0	0	0	0	0	0	0	0	0	0	0	0	0	0	0	0	0	0	0	0	0	0	0	0	0	0	0	0	0	0	0	0	0	0	0	0	0	0	0	0	0
VFG037224(gi:469822544)_(basJ)_isochorismate_synthase_[Acinetobactin_(CVF768)]_[Acinetobacter_baumannii_D1279779]	Acinetobacter_baumannii_D1279779]	basJ	0	0	2	0	0	0	0	0	0	0	0	0	0	0	0	0	0	0	0	0	0	0	0	0	0	0	0	0	0	0	0	0	0	0	0	0	0	0	0	0	0	0	0	0	0	0	0
VFG037828(gi:469823399)_(lpxC)_UDP-3-O-[3-hydroxymyristoyl]_N-acetylglucosaminedeacetylase_[LPS_(CVF774)]_[Acinetobacter_baumannii_D1279779]	Acinetobacter_baumannii_D1279779]	lpxC	0	0	2	0	0	0	0	0	0	0	0	0	0	0	0	0	0	0	0	0	0	0	0	0	0	0	0	0	0	0	0	0	0	0	0	0	0	0	0	0	0	0	0	0	0	0	0
VFG037843(gi:469822169)_(lpxD)_UDP-3-O-[3-hydroxymyristoyl]_glucosamine_N-acyltransferase_[LPS_(CVF774)]_[Acinetobacter_baumannii_D1279779]	Acinetobacter_baumannii_D1279779]	lpxD	0	0	2	0	0	0	0	0	0	0	0	0	0	0	0	0	0	0	0	0	0	0	0	0	0	0	0	0	0	0	0	0	0	0	0	0	0	0	0	0	0	0	0	0	0	0	0
VFG037476(gi:469821050)_(ABD1_08690)_LysR_substrate-binding_domain_protein_[Heme_utilization__(CVF769)]_[Acinetobacter_baumannii_D1279779]	Acinetobacter_baumannii_D1279779]	ABD1_08690	0	0	2	0	0	0	0	0	0	0	0	0	0	0	0	0	0	0	0	0	0	0	0	0	0	0	0	0	0	0	0	0	0	0	0	0	0	0	0	0	0	0	0	0	0	0	0
VFG037697(gi:469822334)_(pgaD)_biofilm_PGA_synthesis_auxiliary_protein_PgaD_[PNAG_(Polysaccharide_poly-N-acetylglucosamine)_(CVF772)]_[Acinetobacter_baumannii_D1279779]	Acinetobacter_baumannii_D1279779]	pgaD	0	0	2	0	0	0	0	0	0	0	0	0	0	0	0	0	0	0	0	0	0	0	0	0	0	0	0	0	0	0	0	0	0	0	0	0	0	0	0	0	0	0	0	0	0	0	0
VFG037631(gi:469822386)_(csuE)_CsuE_[Csu_pili_(CVF770)]_[Acinetobacter_baumannii_D1279779]	Acinetobacter_baumannii_D1279779]	csuE	0	0	2	0	0	0	0	0	0	0	0	0	0	0	0	0	0	0	0	0	0	0	0	0	0	0	0	0	0	0	0	0	0	0	0	0	0	0	0	0	0	0	0	0	0	0	0
VFG038225(gi:469820882)_(bfmR)_two-component_regulatory_system_response_regulator_[Two-component_system_(CVF778)]_[Acinetobacter_baumannii_D1279779]	Acinetobacter_baumannii_D1279779]	bfmR	0	0	2	0	0	0	0	0	0	0	0	0	0	0	0	0	0	0	0	0	0	0	0	0	0	0	0	0	0	0	0	0	0	0	0	0	0	0	0	0	0	0	0	0	0	0	0
VFG037420(gi:469822559)_(bauD)_ferric_acinetobactin_transport_system_ATP-binding_protein_[Acinetobactin_(CVF768)]_[Acinetobacter_baumannii_D1279779]	Acinetobacter_baumannii_D1279779]	bauD	0	0	2	0	0	0	0	0	0	0	0	0	0	0	0	0	0	0	0	0	0	0	0	0	0	0	0	0	0	0	0	0	0	0	0	0	0	0	0	0	0	0	0	0	0	0	0
VFG037579(gi:469822390)_(csuA)_CsuA_[Csu_pili_(CVF770)]_[Acinetobacter_baumannii_D1279779]	Acinetobacter_baumannii_D1279779]	csuA	0	0	2	0	0	0	0	0	0	0	0	0	0	0	0	0	0	0	0	0	0	0	0	0	0	0	0	0	0	0	0	0	0	0	0	0	0	0	0	0	0	0	0	0	0	0	0
VFG037948(gi:469820237)_(ABD1_00550)_hypothetical_protein_[Capsule_(CVF775)]_[Acinetobacter_baumannii_D1279779]	Acinetobacter_baumannii_D1279779]	ABD1_00550	0	0	2	0	0	0	0	0	0	0	0	0	0	0	0	0	0	0	0	0	0	0	0	0	0	0	0	0	0	0	0	0	0	0	0	0	0	0	0	0	0	0	0	0	0	0	0
VFG037238(gi:469822545)_(basI)_phosphopantetheinyl_transferase_component_of_acinetobactin_biosynthesis_[Acinetobactin_(CVF768)]_[Acinetobacter_baumannii_D1279779]	Acinetobacter_baumannii_D1279779]	basI	0	0	2	0	0	0	0	0	0	0	0	0	0	0	0	0	0	0	0	0	0	0	0	0	0	0	0	0	0	0	0	0	0	0	0	0	0	0	0	0	0	0	0	0	0	0	0
VFG037768(gi:469820584)_(lpxL)_lipid_A_biosynthesis_lauroyl_acyltransferase_[LPS_(CVF774)]_[Acinetobacter_baumannii_D1279779]	Acinetobacter_baumannii_D1279779]	lpxL	0	0	2	0	0	0	0	0	0	0	0	0	0	0	0	0	0	0	0	0	0	0	0	0	0	0	0	0	0	0	0	0	0	0	0	0	0	0	0	0	0	0	0	0	0	0	0
VFG038182(gi:469822961)_(ompA)_outer_membrane_protein_A_precursor_[Outer_membrane_protein_(CVF776)]_[Acinetobacter_baumannii_D1279779]	Acinetobacter_baumannii_D1279779]	ompA	0	0	2	0	0	0	0	0	0	0	0	0	0	0	0	0	0	0	0	0	0	0	0	0	0	0	0	0	0	0	0	0	0	0	0	0	0	0	0	0	0	0	0	0	0	0	0
VFG037873(gi:469820232)_(wzb)_low_molecular_weight_protein-tyrosine-phosphatase_[Capsule_(CVF775)]_[Acinetobacter_baumannii_D1279779]	Acinetobacter_baumannii_D1279779]	wzb	0	0	2	0	0	0	0	0	0	0	0	0	0	0	0	0	0	0	0	0	0	0	0	0	0	0	0	0	0	0	0	0	0	0	0	0	0	0	0	0	0	0	0	0	0	0	0
VFG037592(gi:469822389)_(csuB)_CsuB_[Csu_pili_(CVF770)]_[Acinetobacter_baumannii_D1279779]	Acinetobacter_baumannii_D1279779]	csuB	0	0	2	0	0	0	0	0	0	0	0	0	0	0	0	0	0	0	0	0	0	0	0	0	0	0	0	0	0	0	0	0	0	0	0	0	0	0	0	0	0	0	0	0	0	0	0
VFG037566(gi:469822391)_(csuA/B)_CsuA/B_[Csu_pili_(CVF770)]_[Acinetobacter_baumannii_D1279779]	Acinetobacter_baumannii_D1279779]	csuA/B	0	0	2	0	0	0	0	0	0	0	0	0	0	0	0	0	0	0	0	0	0	0	0	0	0	0	0	0	0	0	0	0	0	0	0	0	0	0	0	0	0	0	0	0	0	0	0
VFG037904(gi:387125707)_(ABTJ_03746)_nucleotide_sugar_dehydrogenase_[Capsule_(CVF775)]_[Acinetobacter_baumannii_MDR-TJ]	Acinetobacter_baumannii_MDR-TJ]	ABTJ_03746	0	0	2	0	0	0	0	0	0	0	0	0	0	0	0	0	0	0	0	0	0	0	0	0	0	0	0	0	0	0	0	0	0	0	0	0	0	0	0	0	0	0	0	0	0	0	0
VFG037874(gi:387125705)_(ABTJ_03744)_UDP-glucose-4-epimerase_[Capsule_(CVF775)]_[Acinetobacter_baumannii_MDR-TJ]	Acinetobacter_baumannii_MDR-TJ]	ABTJ_03744	0	0	2	0	0	0	0	0	0	0	0	0	0	0	0	0	0	0	0	0	0	0	0	0	0	0	0	0	0	0	0	0	0	0	0	0	0	0	0	0	0	0	0	0	0	0	0
VFG037365(gi:387123166)_(bauA)_TonB-dependent_siderophore_receptor_[Acinetobactin_(CVF768)]_[Acinetobacter_baumannii_MDR-TJ]	Acinetobacter_baumannii_MDR-TJ]	bauA	0	0	2	0	0	0	0	0	0	0	0	0	0	0	0	0	0	0	0	0	0	0	0	0	0	0	0	0	0	0	0	0	0	0	0	0	0	0	0	0	0	0	0	0	0	0	0
VFG038039(gi:387125716)_(ABTJ_03755)_glycosyltransferase_[Capsule_(CVF775)]_[Acinetobacter_baumannii_MDR-TJ]	Acinetobacter_baumannii_MDR-TJ]	ABTJ_03755	0	0	2	0	0	0	0	0	0	0	0	0	0	0	0	0	0	0	0	0	0	0	0	0	0	0	0	0	0	0	0	0	0	0	0	0	0	0	0	0	0	0	0	0	0	0	0
VFG037644(gi:387122818)_(bap)_type_1_secretion_C-terminal_target_domain_(VC_A0849_subclass)_[Biofilm-associated_protein_(CVF771)]_[Acinetobacter_baumannii_MDR-TJ]	Acinetobacter_baumannii_MDR-TJ]	bap	0	0	2	0	0	0	0	0	0	0	0	0	0	0	0	0	0	0	0	0	0	0	0	0	0	0	0	0	0	0	0	0	0	0	0	0	0	0	0	0	0	0	0	0	0	0	0
VFG037964(gi:387125711)_(ABTJ_03750)_nucleoside-diphosphate-sugar_epimerase_[Capsule_(CVF775)]_[Acinetobacter_baumannii_MDR-TJ]	Acinetobacter_baumannii_MDR-TJ]	ABTJ_03750	0	0	2	0	0	0	0	0	0	0	0	0	0	0	0	0	0	0	0	0	0	0	0	0	0	0	0	0	0	0	0	0	0	0	0	0	0	0	0	0	0	0	0	0	0	0	0
VFG037889(gi:387125706)_(ABTJ_03745)_glucose-6-phosphate_isomerase_[Capsule_(CVF775)]_[Acinetobacter_baumannii_MDR-TJ]	Acinetobacter_baumannii_MDR-TJ]	ABTJ_03745	0	0	2	0	0	0	0	0	0	0	0	0	0	0	0	0	0	0	0	0	0	0	0	0	0	0	0	0	0	0	0	0	0	0	0	0	0	0	0	0	0	0	0	0	0	0	0
VFG038084(gi:387125719)_(ABTJ_03758)_hypothetical_protein_[Capsule_(CVF775)]_[Acinetobacter_baumannii_MDR-TJ]	Acinetobacter_baumannii_MDR-TJ]	ABTJ_03758	0	0	2	0	0	0	0	0	0	0	0	0	0	0	0	0	0	0	0	0	0	0	0	0	0	0	0	0	0	0	0	0	0	0	0	0	0	0	0	0	0	0	0	0	0	0	0
VFG037919(gi:387125708)_(ABTJ_03747)_UTP-glucose-1-phosphate_uridylyltransferase_[Capsule_(CVF775)]_[Acinetobacter_baumannii_MDR-TJ]	Acinetobacter_baumannii_MDR-TJ]	ABTJ_03747	0	0	2	0	0	0	0	0	0	0	0	0	0	0	0	0	0	0	0	0	0	0	0	0	0	0	0	0	0	0	0	0	0	0	0	0	0	0	0	0	0	0	0	0	0	0	0
VFG037859(gi:387125704)_(ABTJ_03743)_phosphomannomutase_[Capsule_(CVF775)]_[Acinetobacter_baumannii_MDR-TJ]	Acinetobacter_baumannii_MDR-TJ]	ABTJ_03743	0	0	2	0	0	0	0	0	0	0	0	0	0	0	0	0	0	0	0	0	0	0	0	0	0	0	0	0	0	0	0	0	0	0	0	0	0	0	0	0	0	0	0	0	0	0	0
VFG037754(gi:387122899)_(lpxM)_Lauroyl/myristoyl_acyltransferase_[LPS_(CVF774)]_[Acinetobacter_baumannii_MDR-TJ]	Acinetobacter_baumannii_MDR-TJ]	lpxM	0	0	2	0	0	0	0	0	0	0	0	0	0	0	0	0	0	0	0	0	0	0	0	0	0	0	0	0	0	0	0	0	0	0	0	0	0	0	0	0	0	0	0	0	0	0	0
VFG037657(gi:387123403)_(pgaA)_poly-beta-1,6_N-acetyl-D-glucosamine_export_porin_PgaA_[PNAG_(Polysaccharide_poly-N-acetylglucosamine)_(CVF772)]_[Acinetobacter_baumannii_MDR-TJ]	Acinetobacter_baumannii_MDR-TJ]	pgaA	0	0	2	0	0	0	0	0	0	0	0	0	0	0	0	0	0	0	0	0	0	0	0	0	0	0	0	0	0	0	0	0	0	0	0	0	0	0	0	0	0	0	0	0	0	0	0
VFG037979(gi:387125712)_(ABTJ_03751)_glycosyltransferase_[Capsule_(CVF775)]_[Acinetobacter_baumannii_MDR-TJ]	Acinetobacter_baumannii_MDR-TJ]	ABTJ_03751	0	0	2	0	0	0	0	0	0	0	0	0	0	0	0	0	0	0	0	0	0	0	0	0	0	0	0	0	0	0	0	0	0	0	0	0	0	0	0	0	0	0	0	0	0	0	0
VFG037580(gi:387123328)_(csuA)_hypothetical_protein_[Csu_pili_(CVF770)]_[Acinetobacter_baumannii_MDR-TJ]	Acinetobacter_baumannii_MDR-TJ]	csuA	0	0	2	0	0	0	0	0	0	0	0	0	0	0	0	0	0	0	0	0	0	0	0	0	0	0	0	0	0	0	0	0	0	0	0	0	0	0	0	0	0	0	0	0	0	0	0
VFG037632(gi:387123332)_(csuE)_hypothetical_protein_[Csu_pili_(CVF770)]_[Acinetobacter_baumannii_MDR-TJ]	Acinetobacter_baumannii_MDR-TJ]	csuE	0	0	2	0	0	0	0	0	0	0	0	0	0	0	0	0	0	0	0	0	0	0	0	0	0	0	0	0	0	0	0	0	0	0	0	0	0	0	0	0	0	0	0	0	0	0	0
VFG037934(gi:387125709)_(ABTJ_03748)_glycosyl_transferase_[Capsule_(CVF775)]_[Acinetobacter_baumannii_MDR-TJ]	Acinetobacter_baumannii_MDR-TJ]	ABTJ_03748	0	0	2	0	0	0	0	0	0	0	0	0	0	0	0	0	0	0	0	0	0	0	0	0	0	0	0	0	0	0	0	0	0	0	0	0	0	0	0	0	0	0	0	0	0	0	0
VFG037994(gi:387125713)_(ABTJ_03752)_UDP-N-acetylglucosamine_2-epimerase_[Capsule_(CVF775)]_[Acinetobacter_baumannii_MDR-TJ]	Acinetobacter_baumannii_MDR-TJ]	ABTJ_03752	0	0	2	0	0	0	0	0	0	0	0	0	0	0	0	0	0	0	0	0	0	0	0	0	0	0	0	0	0	0	0	0	0	0	0	0	0	0	0	0	0	0	0	0	0	0	0
VFG037949(gi:387125710)_(ABTJ_03749)_UDP-N-acetylmuramyl_pentapeptide_phosphotransferase/UDP-N-acetylglucosamine-1-phosphate_transferase_[Capsule_(CVF775)]_[Acinetobacter_baumannii_MDR-TJ]	Acinetobacter_baumannii_MDR-TJ]	ABTJ_03749	0	0	2	0	0	0	0	0	0	0	0	0	0	0	0	0	0	0	0	0	0	0	0	0	0	0	0	0	0	0	0	0	0	0	0	0	0	0	0	0	0	0	0	0	0	0	0
VFG038054(gi:387125717)_(ABTJ_03756)_hypothetical_protein_[Capsule_(CVF775)]_[Acinetobacter_baumannii_MDR-TJ]	Acinetobacter_baumannii_MDR-TJ]	ABTJ_03756	0	0	2	0	0	0	0	0	0	0	0	0	0	0	0	0	0	0	0	0	0	0	0	0	0	0	0	0	0	0	0	0	0	0	0	0	0	0	0	0	0	0	0	0	0	0	0
VFG038010(gi:384141331)_(ABZJ_00085)_IS4_family_transposase_ORF_1_[Capsule_(CVF775)]_[Acinetobacter_baumannii_MDR-ZJ06]	Acinetobacter_baumannii_MDR-ZJ06]	ABZJ_00085	240	0	2	0	3	0	1	0	0	0	0	0	0	2	0	0	0	0	0	0	0	0	0	0	0	0	0	0	2	0	0	0	0	0	0	0	0	0	0	0	0	0	0	0	0	0	0
VFG038025(gi:384141332)_(ABZJ_00086)_IS4_family_transposase_ORF_2_[Capsule_(CVF775)]_[Acinetobacter_baumannii_MDR-ZJ06]	Acinetobacter_baumannii_MDR-ZJ06]	ABZJ_00086	180	0	2	0	4	0	0	0	0	0	0	0	0	2	0	0	0	0	0	0	0	0	0	0	0	0	0	0	0	0	0	0	0	0	0	0	0	0	0	0	0	0	0	0	0	0	0
VFG037935(gi:384141326)_(ABZJ_00080)_putative_UDP-N-acetylglucosamine_2-epimerase_[Capsule_(CVF775)]_[Acinetobacter_baumannii_MDR-ZJ06]	Acinetobacter_baumannii_MDR-ZJ06]	ABZJ_00080	0	0	2	0	0	0	0	0	0	0	0	0	0	0	0	0	0	0	0	0	0	0	0	0	0	0	0	0	0	0	0	0	0	0	0	0	0	0	0	0	0	0	0	0	0	0	0
VFG038126(gi:384141339)_(ABZJ_00093)_UTP-glucose-1-phosphate_uridylyltransferase_[Capsule_(CVF775)]_[Acinetobacter_baumannii_MDR-ZJ06]	Acinetobacter_baumannii_MDR-ZJ06]	ABZJ_00093	0	0	2	0	0	0	0	0	0	0	0	0	0	0	0	0	0	0	0	0	0	0	0	0	0	0	0	0	0	0	0	0	0	0	0	0	0	0	0	0	0	0	0	0	0	0	0
VFG037890(gi:384141323)_(ABZJ_00077)_putative_UDP-glucose/GDP-mannose_dehydrogenase_[Capsule_(CVF775)]_[Acinetobacter_baumannii_MDR-ZJ06]	Acinetobacter_baumannii_MDR-ZJ06]	ABZJ_00077	0	0	2	0	0	0	0	0	0	0	0	0	0	0	0	0	0	0	0	0	0	0	0	0	0	0	0	0	0	0	0	0	0	0	0	0	0	0	0	0	0	0	0	0	0	0	0
VFG037478(gi:384142257)_(ABZJ_01011)_transcriptional_regulator_[Heme_utilization__(CVF769)]_[Acinetobacter_baumannii_MDR-ZJ06]	Acinetobacter_baumannii_MDR-ZJ06]	ABZJ_01011	0	0	2	0	0	0	0	0	0	0	0	0	0	0	0	0	0	0	0	0	0	0	0	0	0	0	0	0	0	0	0	0	0	0	0	0	0	0	0	0	0	0	0	0	0	0	0
VFG037860(gi:384141321)_(ABZJ_00075)_low_molecular_weight_protein-tyrosine-phosphatase_[Capsule_(CVF775)]_[Acinetobacter_baumannii_MDR-ZJ06]	Acinetobacter_baumannii_MDR-ZJ06]	ABZJ_00075	0	0	2	0	0	0	0	0	0	0	0	0	0	0	0	0	0	0	0	0	0	0	0	0	0	0	0	0	0	0	0	0	0	0	0	0	0	0	0	0	0	0	0	0	0	0	0
VFG038099(gi:384141337)_(ABZJ_00091)_UDP-glucose_4-epimerase_[Capsule_(CVF775)]_[Acinetobacter_baumannii_MDR-ZJ06]	Acinetobacter_baumannii_MDR-ZJ06]	ABZJ_00091	0	0	2	0	0	0	0	0	0	0	0	0	0	0	0	0	0	0	0	0	0	0	0	0	0	0	0	0	0	0	0	0	0	0	0	0	0	0	0	0	0	0	0	0	0	0	0
VFG037508(gi:384142261)_(ABZJ_01015)_hypothetical_protein_[Heme_utilization__(CVF769)]_[Acinetobacter_baumannii_MDR-ZJ06]	Acinetobacter_baumannii_MDR-ZJ06]	ABZJ_01015	0	0	2	0	0	0	0	0	0	0	0	0	0	0	0	0	0	0	0	0	0	0	0	0	0	0	0	0	0	0	0	0	0	0	0	0	0	0	0	0	0	0	0	0	0	0	0
VFG037875(gi:384141322)_(ABZJ_00076)_putative_outer_membrane_protein_[Capsule_(CVF775)]_[Acinetobacter_baumannii_MDR-ZJ06]	Acinetobacter_baumannii_MDR-ZJ06]	ABZJ_00076	0	0	2	0	0	0	0	0	0	0	0	0	0	0	0	0	0	0	0	0	0	0	0	0	0	0	0	0	0	0	0	0	0	0	0	0	0	0	0	0	0	0	0	0	0	0	0
VFG037965(gi:384141328)_(ABZJ_00082)_putative_polysaccharide_biosynthesis_protein_[Capsule_(CVF775)]_[Acinetobacter_baumannii_MDR-ZJ06]	Acinetobacter_baumannii_MDR-ZJ06]	ABZJ_00082	0	0	2	0	0	0	0	0	0	0	0	0	0	0	0	0	0	0	0	0	0	0	0	0	0	0	0	0	0	0	0	0	0	0	0	0	0	0	0	0	0	0	0	0	0	0	0
VFG038070(gi:384141335)_(ABZJ_00089)_UDP-N-acetylglucosamine_2-epimerase_[Capsule_(CVF775)]_[Acinetobacter_baumannii_MDR-ZJ06]	Acinetobacter_baumannii_MDR-ZJ06]	ABZJ_00089	0	0	2	0	0	0	0	0	0	0	0	0	0	0	0	0	0	0	0	0	0	0	0	0	0	0	0	0	0	0	0	0	0	0	0	0	0	0	0	0	0	0	0	0	0	0	0
VFG037950(gi:384141327)_(ABZJ_00081)_putative_polysaccharide_biosynthesis_protein_[Capsule_(CVF775)]_[Acinetobacter_baumannii_MDR-ZJ06]	Acinetobacter_baumannii_MDR-ZJ06]	ABZJ_00081	0	0	2	0	0	0	0	0	0	0	0	0	0	0	0	0	0	0	0	0	0	0	0	0	0	0	0	0	0	0	0	0	0	0	0	0	0	0	0	0	0	0	0	0	0	0	0
VFG037980(gi:384141329)_(ABZJ_00083)_putative_polysaccharide_biosynthesis_protein_[Capsule_(CVF775)]_[Acinetobacter_baumannii_MDR-ZJ06]	Acinetobacter_baumannii_MDR-ZJ06]	ABZJ_00083	0	0	2	0	0	0	0	0	0	0	0	0	0	0	0	0	0	0	0	0	0	0	0	0	0	0	0	0	0	0	0	0	0	0	0	0	0	0	0	0	0	0	0	0	0	0	0
VFG037380(gi:384144022)_(bauB)_ABC-type_enterochelin_transport_system,_periplasmic_component_[Acinetobactin_(CVF768)]_[Acinetobacter_baumannii_MDR-ZJ06]	Acinetobacter_baumannii_MDR-ZJ06]	bauB	0	0	2	0	0	0	0	0	0	0	0	0	0	0	0	0	0	0	0	0	0	0	0	0	0	0	0	0	0	0	0	0	0	0	0	0	0	0	0	0	0	0	0	0	0	0	0
VFG037500(gi:384142260)_(ABZJ_01014)_putative_receptor_protein,_putative_Heme_acquisition_system_receptor_[Heme_utilization__(CVF769)]_[Acinetobacter_baumannii_MDR-ZJ06]	Acinetobacter_baumannii_MDR-ZJ06]	ABZJ_01014	0	0	2	0	0	0	0	0	0	0	0	0	0	0	0	0	0	0	0	0	0	0	0	0	0	0	0	0	0	0	0	0	0	0	0	0	0	0	0	0	0	0	0	0	0	0	0
VFG038159(gi:384141342)_(ABZJ_00096)_UDP-glucose_4-epimerase_[Capsule_(CVF775)]_[Acinetobacter_baumannii_MDR-ZJ06]	Acinetobacter_baumannii_MDR-ZJ06]	ABZJ_00096	0	0	2	0	0	0	0	0	0	0	0	0	0	0	0	0	0	0	0	0	0	0	0	0	0	0	0	0	0	0	0	0	0	0	0	0	0	0	0	0	0	0	0	0	0	0	0
VFG038138(gi:384141340)_(ABZJ_00094)_putative_UDP-glucose_6-dehydrogenase_(Ugd)_(Udg)_[Capsule_(CVF775)]_[Acinetobacter_baumannii_MDR-ZJ06]	Acinetobacter_baumannii_MDR-ZJ06]	ABZJ_00094	0	0	2	0	0	0	0	0	0	0	0	0	0	0	0	0	0	0	0	0	0	0	0	0	0	0	0	0	0	0	0	0	0	0	0	0	0	0	0	0	0	0	0	0	0	0	0
VFG037995(gi:384141330)_(ABZJ_00084)_putative_polysaccharide_biosynthesis_protein_[Capsule_(CVF775)]_[Acinetobacter_baumannii_MDR-ZJ06]	Acinetobacter_baumannii_MDR-ZJ06]	ABZJ_00084	0	0	2	0	0	0	0	0	0	0	0	0	0	0	0	0	0	0	0	0	0	0	0	0	0	0	0	0	0	0	0	0	0	0	0	0	0	0	0	0	0	0	0	0	0	0	0
VFG038085(gi:384141336)_(ABZJ_00090)_hypothetical_protein_[Capsule_(CVF775)]_[Acinetobacter_baumannii_MDR-ZJ06]	Acinetobacter_baumannii_MDR-ZJ06]	ABZJ_00090	0	0	2	0	0	0	0	0	0	0	0	0	0	0	0	0	0	0	0	0	0	0	0	0	0	0	0	0	0	0	0	0	0	0	0	0	0	0	0	0	0	0	0	0	0	0	0
VFG037920(gi:384141325)_(ABZJ_00079)_putative_polysaccharide_biosynthesis_protein_[Capsule_(CVF775)]_[Acinetobacter_baumannii_MDR-ZJ06]	Acinetobacter_baumannii_MDR-ZJ06]	ABZJ_00079	0	0	2	0	0	0	0	0	0	0	0	0	0	0	0	0	0	0	0	0	0	0	0	0	0	0	0	0	0	0	0	0	0	0	0	0	0	0	0	0	0	0	0	0	0	0	0
VFG038055(gi:384141334)_(ABZJ_00088)_protein_WbjC_[Capsule_(CVF775)]_[Acinetobacter_baumannii_MDR-ZJ06]	Acinetobacter_baumannii_MDR-ZJ06]	ABZJ_00088	0	0	2	0	0	0	0	0	0	0	0	0	0	0	0	0	0	0	0	0	0	0	0	0	0	0	0	0	0	0	0	0	0	0	0	0	0	0	0	0	0	0	0	0	0	0	0
VFG038149(gi:384141341)_(ABZJ_00095)_glucose-6-phosphate_isomerase_[Capsule_(CVF775)]_[Acinetobacter_baumannii_MDR-ZJ06]	Acinetobacter_baumannii_MDR-ZJ06]	ABZJ_00095	0	0	2	0	0	0	0	0	0	0	0	0	0	0	0	0	0	0	0	0	0	0	0	0	0	0	0	0	0	0	0	0	0	0	0	0	0	0	0	0	0	0	0	0	0	0	0
VFG037905(gi:384141324)_(ABZJ_00078)_putative_nucleoside-diphosphate_sugar_epimerase_[Capsule_(CVF775)]_[Acinetobacter_baumannii_MDR-ZJ06]	Acinetobacter_baumannii_MDR-ZJ06]	ABZJ_00078	0	0	2	0	0	0	0	0	0	0	0	0	0	0	0	0	0	0	0	0	0	0	0	0	0	0	0	0	0	0	0	0	0	0	0	0	0	0	0	0	0	0	0	0	0	0	0
VFG038040(gi:384141333)_(ABZJ_00087)_protein_WbjB_[Capsule_(CVF775)]_[Acinetobacter_baumannii_MDR-ZJ06]	Acinetobacter_baumannii_MDR-ZJ06]	ABZJ_00087	0	0	2	0	0	0	0	0	0	0	0	0	0	0	0	0	0	0	0	0	0	0	0	0	0	0	0	0	0	0	0	0	0	0	0	0	0	0	0	0	0	0	0	0	0	0	0
VFG037394(gi:384144023)_(bauE)_ferric_acinetobactin_transport_system_ATP-binding_protein_[Acinetobactin_(CVF768)]_[Acinetobacter_baumannii_MDR-ZJ06]	Acinetobacter_baumannii_MDR-ZJ06]	bauE	0	0	2	0	0	0	0	0	0	0	0	0	0	0	0	0	0	0	0	0	0	0	0	0	0	0	0	0	0	0	0	0	0	0	0	0	0	0	0	0	0	0	0	0	0	0	0
VFG037226(gi:384144010)_(basJ)_isochorismate_synthetase_[Acinetobactin_(CVF768)]_[Acinetobacter_baumannii_MDR-ZJ06]	Acinetobacter_baumannii_MDR-ZJ06]	basJ	0	0	2	0	0	0	0	0	0	0	0	0	0	0	0	0	0	0	0	0	0	0	0	0	0	0	0	0	0	0	0	0	0	0	0	0	0	0	0	0	0	0	0	0	0	0	0
VFG037485(gi:384142258)_(ABZJ_01012)_RNA_polymerase_sigma_factor_FecI_[Heme_utilization__(CVF769)]_[Acinetobacter_baumannii_MDR-ZJ06]	Acinetobacter_baumannii_MDR-ZJ06]	ABZJ_01012	0	0	2	0	0	0	0	0	0	0	0	0	0	0	0	0	0	0	0	0	0	0	0	0	0	0	0	0	0	0	0	0	0	0	0	0	0	0	0	0	0	0	0	0	0	0	0
VFG038257(gi:384141533)_(pbpG)_D-alanyl-D-alanine_endopeptidase_[PbpG_(CVF779)]_[Acinetobacter_baumannii_MDR-ZJ06]	Acinetobacter_baumannii_MDR-ZJ06]	pbpG	0	0	2	0	0	0	0	0	0	0	0	0	0	0	0	0	0	0	0	0	0	0	0	0	0	0	0	0	0	0	0	0	0	0	0	0	0	0	0	0	0	0	0	0	0	0	0
VFG037906(gi:169632083)_(ABSDF0066)_UDP-glucose/GDP-mannose_dehydrogenase_[Capsule_(CVF775)]_[Acinetobacter_baumannii_SDF]	Acinetobacter_baumannii_SDF]	ABSDF0066	1	0	2	0	0	0	0	0	0	0	0	0	0	0	0	0	1	0	0	0	0	0	0	0	0	0	0	0	0	0	0	0	0	0	0	0	0	0	0	0	0	0	0	0	0	0	0
VFG037891(gi:169632082)_(wza)_polysaccharide_export_protein_[Capsule_(CVF775)]_[Acinetobacter_baumannii_SDF]	Acinetobacter_baumannii_SDF]	wza	0	0	2	0	0	0	0	0	0	0	0	0	0	0	0	0	0	0	0	0	0	0	0	0	0	0	0	0	0	0	0	0	0	0	0	0	0	0	0	0	0	0	0	0	0	0	0
VFG037194(gi:169632072)_(plc)_phospholipase_C_[Phospholipase_C_(CVF766)]_[Acinetobacter_baumannii_SDF]	Acinetobacter_baumannii_SDF]	plc	0	0	2	0	0	0	0	0	0	0	0	0	0	0	0	0	0	0	0	0	0	0	0	0	0	0	0	0	0	0	0	0	0	0	0	0	0	0	0	0	0	0	0	0	0	0	0
VFG037714(gi:169633158)_(adeF)_multidrug_ABC_transporter_[AdeFGH_efflux_pump/transport_autoinducer_(CVF773)]_[Acinetobacter_baumannii_SDF]	Acinetobacter_baumannii_SDF]	adeF	0	0	2	0	0	0	0	0	0	0	0	0	0	0	0	0	0	0	0	0	0	0	0	0	0	0	0	0	0	0	0	0	0	0	0	0	0	0	0	0	0	0	0	0	0	0	0
VFG037921(gi:169632084)_(ABSDF0067)_nucleoside-diphosphate_sugar_epimerase_[Capsule_(CVF775)]_[Acinetobacter_baumannii_SDF]	Acinetobacter_baumannii_SDF]	ABSDF0067	0	0	2	0	0	0	0	0	0	0	0	0	0	0	0	0	0	0	0	0	0	0	0	0	0	0	0	0	0	0	0	0	0	0	0	0	0	0	0	0	0	0	0	0	0	0	0
VFG037195(gi:169633759)_(plc)_phospholipase_C_[Phospholipase_C_(CVF766)]_[Acinetobacter_baumannii_SDF]	Acinetobacter_baumannii_SDF]	plc	0	0	2	0	0	0	0	0	0	0	0	0	0	0	0	0	0	0	0	0	0	0	0	0	0	0	0	0	0	0	0	0	0	0	0	0	0	0	0	0	0	0	0	0	0	0	0
VFG037509(gi:169633826)_(ABSDF2284)_protein_involved_in_heme_utilization_[Heme_utilization__(CVF769)]_[Acinetobacter_baumannii_SDF]	Acinetobacter_baumannii_SDF]	ABSDF2284	0	0	2	0	0	0	0	0	0	0	0	0	0	0	0	0	0	0	0	0	0	0	0	0	0	0	0	0	0	0	0	0	0	0	0	0	0	0	0	0	0	0	0	0	0	0	0
VFG037541(gi:169633822)_(ABSDF2280)_hypothetical_protein_[Heme_utilization__(CVF769)]_[Acinetobacter_baumannii_SDF]	Acinetobacter_baumannii_SDF]	ABSDF2280	0	0	2	0	0	0	0	0	0	0	0	0	0	0	0	0	0	0	0	0	0	0	0	0	0	0	0	0	0	0	0	0	0	0	0	0	0	0	0	0	0	0	0	0	0	0	0
VFG037517(gi:169633825)_(ABSDF2283)_hypothetical_protein_[Heme_utilization__(CVF769)]_[Acinetobacter_baumannii_SDF]	Acinetobacter_baumannii_SDF]	ABSDF2283	0	0	2	0	0	0	0	0	0	0	0	0	0	0	0	0	0	0	0	0	0	0	0	0	0	0	0	0	0	0	0	0	0	0	0	0	0	0	0	0	0	0	0	0	0	0	0
VFG037525(gi:169633824)_(ABSDF2282)_hypothetical_protein_[Heme_utilization__(CVF769)]_[Acinetobacter_baumannii_SDF]	Acinetobacter_baumannii_SDF]	ABSDF2282	0	0	2	0	0	0	0	0	0	0	0	0	0	0	0	0	0	0	0	0	0	0	0	0	0	0	0	0	0	0	0	0	0	0	0	0	0	0	0	0	0	0	0	0	0	0	0
VFG038243(gi:169634183)_(bfmS)_sensory_histidine_kinase_in_two-component_regulatory_system_[Two-component_system_(CVF778)]_[Acinetobacter_baumannii_SDF]	Acinetobacter_baumannii_SDF]	bfmS	0	0	2	0	0	0	0	0	0	0	0	0	0	0	0	0	0	0	0	0	0	0	0	0	0	0	0	0	0	0	0	0	0	0	0	0	0	0	0	0	0	0	0	0	0	0	0
VFG038185(gi:169632496)_(ompA)_Outer_membrane_protein_OmpA-like_[Outer_membrane_protein_(CVF776)]_[Acinetobacter_baumannii_SDF]	Acinetobacter_baumannii_SDF]	ompA	0	0	2	0	0	0	0	0	0	0	0	0	0	0	0	0	0	0	0	0	0	0	0	0	0	0	0	0	0	0	0	0	0	0	0	0	0	0	0	0	0	0	0	0	0	0	0
VFG038127(gi:169632098)_(pgi)_glucose-6-phosphate_isomerase_[Capsule_(CVF775)]_[Acinetobacter_baumannii_SDF]	Acinetobacter_baumannii_SDF]	pgi	0	0	2	0	0	0	0	0	0	0	0	0	0	0	0	0	0	0	0	0	0	0	0	0	0	0	0	0	0	0	0	0	0	0	0	0	0	0	0	0	0	0	0	0	0	0	0
VFG038071(gi:169632094)_(ABSDF0077)_glycosyl_transferase_family_protein_[Capsule_(CVF775)]_[Acinetobacter_baumannii_SDF]	Acinetobacter_baumannii_SDF]	ABSDF0077	0	0	2	0	0	0	0	0	0	0	0	0	0	0	0	0	0	0	0	0	0	0	0	0	0	0	0	0	0	0	0	0	0	0	0	0	0	0	0	0	0	0	0	0	0	0	0
VFG037501(gi:169633827)_(ABSDF2285)_receptor_protein;_Heme_acquisition_system_receptor_[Heme_utilization__(CVF769)]_[Acinetobacter_baumannii_SDF]	Acinetobacter_baumannii_SDF]	ABSDF2285	0	0	2	0	0	0	0	0	0	0	0	0	0	0	0	0	0	0	0	0	0	0	0	0	0	0	0	0	0	0	0	0	0	0	0	0	0	0	0	0	0	0	0	0	0	0	0
VFG037729(gi:169633157)_(adeG)_multidrug_ABC_transporter_[AdeFGH_efflux_pump/transport_autoinducer_(CVF773)]_[Acinetobacter_baumannii_SDF]	Acinetobacter_baumannii_SDF]	adeG	0	0	2	0	0	0	0	0	0	0	0	0	0	0	0	0	0	0	0	0	0	0	0	0	0	0	0	0	0	0	0	0	0	0	0	0	0	0	0	0	0	0	0	0	0	0	0
VFG037951(gi:169632086)_(ABSDF0069)_UDP-N-acetylglucosamine_2-epimerase_[Capsule_(CVF775)]_[Acinetobacter_baumannii_SDF]	Acinetobacter_baumannii_SDF]	ABSDF0069	0	0	2	0	0	0	0	0	0	0	0	0	0	0	0	0	0	0	0	0	0	0	0	0	0	0	0	0	0	0	0	0	0	0	0	0	0	0	0	0	0	0	0	0	0	0	0
VFG038139(gi:169632099)_(galE)_UDP-glucose_4-epimerase_[Capsule_(CVF775)]_[Acinetobacter_baumannii_SDF]	Acinetobacter_baumannii_SDF]	galE	0	0	2	0	0	0	0	0	0	0	0	0	0	0	0	0	0	0	0	0	0	0	0	0	0	0	0	0	0	0	0	0	0	0	0	0	0	0	0	0	0	0	0	0	0	0	0
VFG038150(gi:169632100)_(manB)_bifunctional_phosphomannomutase/phosphoglucomutas_[Capsule_(CVF775)]_[Acinetobacter_baumannii_SDF]	Acinetobacter_baumannii_SDF]	manB	0	0	2	0	0	0	0	0	0	0	0	0	0	0	0	0	0	0	0	0	0	0	0	0	0	0	0	0	0	0	0	0	0	0	0	0	0	0	0	0	0	0	0	0	0	0	0
VFG038011(gi:169632090)_(ABSDF0073)_polysaccharide_biosynthesis_protein_[Capsule_(CVF775)]_[Acinetobacter_baumannii_SDF]	Acinetobacter_baumannii_SDF]	ABSDF0073	0	0	2	0	0	0	0	0	0	0	0	0	0	0	0	0	0	0	0	0	0	0	0	0	0	0	0	0	0	0	0	0	0	0	0	0	0	0	0	0	0	0	0	0	0	0	0
VFG038056(gi:169632093)_(ABSDF0076)_glycosyltransferase_[Capsule_(CVF775)]_[Acinetobacter_baumannii_SDF]	Acinetobacter_baumannii_SDF]	ABSDF0076	0	0	2	0	0	0	0	0	0	0	0	0	0	0	0	0	0	0	0	0	0	0	0	0	0	0	0	0	0	0	0	0	0	0	0	0	0	0	0	0	0	0	0	0	0	0	0
VFG037861(gi:169632080)_(ptk)_tyrosine-protein_kinase,_autophosphorylates_[Capsule_(CVF775)]_[Acinetobacter_baumannii_SDF]	Acinetobacter_baumannii_SDF]	ptk	0	0	2	0	0	0	0	0	0	0	0	0	0	0	0	0	0	0	0	0	0	0	0	0	0	0	0	0	0	0	0	0	0	0	0	0	0	0	0	0	0	0	0	0	0	0	0
VFG037981(gi:169632088)_(ABSDF0071)_hypothetical_protein_[Capsule_(CVF775)]_[Acinetobacter_baumannii_SDF]	Acinetobacter_baumannii_SDF]	ABSDF0071	0	0	2	0	0	0	0	0	0	0	0	0	0	0	0	0	0	0	0	0	0	0	0	0	0	0	0	0	0	0	0	0	0	0	0	0	0	0	0	0	0	0	0	0	0	0	0
VFG037786(gi:169634470)_(lpsB)_glycosyltransferase_[LPS_(CVF774)]_[Acinetobacter_baumannii_SDF]	Acinetobacter_baumannii_SDF]	lpsB	0	0	2	0	0	0	0	0	0	0	0	0	0	0	0	0	0	0	0	0	0	0	0	0	0	0	0	0	0	0	0	0	0	0	0	0	0	0	0	0	0	0	0	0	0	0	0
VFG038041(gi:169632092)_(ABSDF0075)_polysaccharide_biosynthesis_protein_[Capsule_(CVF775)]_[Acinetobacter_baumannii_SDF]	Acinetobacter_baumannii_SDF]	ABSDF0075	0	0	2	0	0	0	0	0	0	0	0	0	0	0	0	0	0	0	0	0	0	0	0	0	0	0	0	0	0	0	0	0	0	0	0	0	0	0	0	0	0	0	0	0	0	0	0
VFG037936(gi:169632085)_(ABSDF0068)_polysaccharide_biosynthesis_protein_[Capsule_(CVF775)]_[Acinetobacter_baumannii_SDF]	Acinetobacter_baumannii_SDF]	ABSDF0068	0	0	2	0	0	0	0	0	0	0	0	0	0	0	0	0	0	0	0	0	0	0	0	0	0	0	0	0	0	0	0	0	0	0	0	0	0	0	0	0	0	0	0	0	0	0	0
VFG037816(gi:169633516)_(lpxB)_lipid-A-disaccharide_synthase_[LPS_(CVF774)]_[Acinetobacter_baumannii_SDF]	Acinetobacter_baumannii_SDF]	lpxB	0	0	2	0	0	0	0	0	0	0	0	0	0	0	0	0	0	0	0	0	0	0	0	0	0	0	0	0	0	0	0	0	0	0	0	0	0	0	0	0	0	0	0	0	0	0	0
VFG037801(gi:169633339)_(lpxA)_UDP-N-acetylglucosamine_acyltransferase_[LPS_(CVF774)]_[Acinetobacter_baumannii_SDF]	Acinetobacter_baumannii_SDF]	lpxA	0	0	2	0	0	0	0	0	0	0	0	0	0	0	0	0	0	0	0	0	0	0	0	0	0	0	0	0	0	0	0	0	0	0	0	0	0	0	0	0	0	0	0	0	0	0	0
VFG037533(gi:169633823)_(hemO)_heme_oxygenase_[Heme_utilization__(CVF769)]_[Acinetobacter_baumannii_SDF]	Acinetobacter_baumannii_SDF]	hemO	0	0	2	0	0	0	0	0	0	0	0	0	0	0	0	0	0	0	0	0	0	0	0	0	0	0	0	0	0	0	0	0	0	0	0	0	0	0	0	0	0	0	0	0	0	0	0
VFG038258(gi:169634636)_(pbpG)_D-alanyl-D-alanine_endopeptidase_[PbpG_(CVF779)]_[Acinetobacter_baumannii_SDF]	Acinetobacter_baumannii_SDF]	pbpG	0	0	2	0	0	0	0	0	0	0	0	0	0	0	0	0	0	0	0	0	0	0	0	0	0	0	0	0	0	0	0	0	0	0	0	0	0	0	0	0	0	0	0	0	0	0	0
VFG037966(gi:169632087)_(ABSDF0070)_polysaccharide_biosynthesis_protein_[Capsule_(CVF775)]_[Acinetobacter_baumannii_SDF]	Acinetobacter_baumannii_SDF]	ABSDF0070	0	0	2	0	0	0	0	0	0	0	0	0	0	0	0	0	0	0	0	0	0	0	0	0	0	0	0	0	0	0	0	0	0	0	0	0	0	0	0	0	0	0	0	0	0	0	0
VFG037212(gi:169634285)_(plcD)_phospholipase_D_[Phospholipase_D_(CVF767)]_[Acinetobacter_baumannii_SDF]	Acinetobacter_baumannii_SDF]	plcD	0	0	2	0	0	0	0	0	0	0	0	0	0	0	0	0	0	0	0	0	0	0	0	0	0	0	0	0	0	0	0	0	0	0	0	0	0	0	0	0	0	0	0	0	0	0	0
VFG037756(gi:169632698)_(lpxM)_lipid_A_biosynthesis_lauroyl_acyltransferase_[LPS_(CVF774)]_[Acinetobacter_baumannii_SDF]	Acinetobacter_baumannii_SDF]	lpxM	0	0	2	0	0	0	0	0	0	0	0	0	0	0	0	0	0	0	0	0	0	0	0	0	0	0	0	0	0	0	0	0	0	0	0	0	0	0	0	0	0	0	0	0	0	0	0
VFG038026(gi:169632091)_(ABSDF0074)_polysaccharide_biosynthesis_protein_[Capsule_(CVF775)]_[Acinetobacter_baumannii_SDF]	Acinetobacter_baumannii_SDF]	ABSDF0074	0	0	2	0	0	0	0	0	0	0	0	0	0	0	0	0	0	0	0	0	0	0	0	0	0	0	0	0	0	0	0	0	0	0	0	0	0	0	0	0	0	0	0	0	0	0	0
VFG037996(gi:169632089)_(ABSDF0072)_polysaccharide_biosynthesis_protein_[Capsule_(CVF775)]_[Acinetobacter_baumannii_SDF]	Acinetobacter_baumannii_SDF]	ABSDF0072	0	0	2	0	0	0	0	0	0	0	0	0	0	0	0	0	0	0	0	0	0	0	0	0	0	0	0	0	0	0	0	0	0	0	0	0	0	0	0	0	0	0	0	0	0	0	0
VFG038114(gi:169632097)_(ABSDF0080)_UDP-glucose_6-dehydrogenase_(Ugd)_(Udg)_[Capsule_(CVF775)]_[Acinetobacter_baumannii_SDF]	Acinetobacter_baumannii_SDF]	ABSDF0080	0	0	2	0	0	0	0	0	0	0	0	0	0	0	0	0	0	0	0	0	0	0	0	0	0	0	0	0	0	0	0	0	0	0	0	0	0	0	0	0	0	0	0	0	0	0	0
VFG038086(gi:169632095)_(ABSDF0078)_UDP-galactose_phosphate_transferase_(WeeH)_[Capsule_(CVF775)]_[Acinetobacter_baumannii_SDF]	Acinetobacter_baumannii_SDF]	ABSDF0078	0	0	2	0	0	0	0	0	0	0	0	0	0	0	0	0	0	0	0	0	0	0	0	0	0	0	0	0	0	0	0	0	0	0	0	0	0	0	0	0	0	0	0	0	0	0	0
VFG038100(gi:169632096)_(galU)_UTP-glucose-1-phosphate_uridylyltransferase_[Capsule_(CVF775)]_[Acinetobacter_baumannii_SDF]	Acinetobacter_baumannii_SDF]	galU	0	0	2	0	0	0	0	0	0	0	0	0	0	0	0	0	0	0	0	0	0	0	0	0	0	0	0	0	0	0	0	0	0	0	0	0	0	0	0	0	0	0	0	0	0	0	0
VFG037771(gi:169634469)_(lpxL)_lipid_A_biosynthesis_lauroyl_acyltransferase_(heat_shock_protein_B)_[LPS_(CVF774)]_[Acinetobacter_baumannii_SDF]	Acinetobacter_baumannii_SDF]	lpxL	0	0	2	0	0	0	0	0	0	0	0	0	0	0	0	0	0	0	0	0	0	0	0	0	0	0	0	0	0	0	0	0	0	0	0	0	0	0	0	0	0	0	0	0	0	0	0
VFG037831(gi:169634765)_(lpxC)_UDP-3-O-[3-hydroxymyristoyl]_N-acetylglucosamine_deacetylase_[LPS_(CVF774)]_[Acinetobacter_baumannii_SDF]	Acinetobacter_baumannii_SDF]	lpxC	0	0	2	0	0	0	0	0	0	0	0	0	0	0	0	0	0	0	0	0	0	0	0	0	0	0	0	0	0	0	0	0	0	0	0	0	0	0	0	0	0	0	0	0	0	0	0
VFG037846(gi:169633337)_(lpxD)_UDP-3-O-[3-hydroxymyristoyl]_glucosamine_N-acyltransferase_[LPS_(CVF774)]_[Acinetobacter_baumannii_SDF]	Acinetobacter_baumannii_SDF]	lpxD	0	0	2	0	0	0	0	0	0	0	0	0	0	0	0	0	0	0	0	0	0	0	0	0	0	0	0	0	0	0	0	0	0	0	0	0	0	0	0	0	0	0	0	0	0	0	0
VFG037486(gi:169633828)_(ABSDF2288)_RNA_polymerase_sigma_factor_(iron_regulated)_[Heme_utilization__(CVF769)]_[Acinetobacter_baumannii_SDF]	Acinetobacter_baumannii_SDF]	ABSDF2288	0	0	2	0	0	0	0	0	0	0	0	0	0	0	0	0	0	0	0	0	0	0	0	0	0	0	0	0	0	0	0	0	0	0	0	0	0	0	0	0	0	0	0	0	0	0	0
VFG038228(gi:169634184)_(bfmR)_OmpR_family_response_regulator_[Two-component_system_(CVF778)]_[Acinetobacter_baumannii_SDF]	Acinetobacter_baumannii_SDF]	bfmR	0	0	2	0	0	0	0	0	0	0	0	0	0	0	0	0	0	0	0	0	0	0	0	0	0	0	0	0	0	0	0	0	0	0	0	0	0	0	0	0	0	0	0	0	0	0	0
VFG037907(gi:385235632)_(ABTW07_0082)_UDP-N-acetyl-D-mannosaminuronate_dehydrogenase_[Capsule_(CVF775)]_[Acinetobacter_baumannii_TCDC-AB0715]	Acinetobacter_baumannii_TCDC-AB0715]	ABTW07_0082	1	0	2	0	0	0	0	0	0	0	0	0	0	0	0	0	1	0	0	0	0	0	0	0	0	0	0	0	0	0	0	0	0	0	0	0	0	0	0	0	0	0	0	0	0	0	0
VFG037892(gi:385235631)_(ABTW07_0081)_hypothetical_protein_[Capsule_(CVF775)]_[Acinetobacter_baumannii_TCDC-AB0715]	Acinetobacter_baumannii_TCDC-AB0715]	ABTW07_0081	0	0	2	0	0	0	0	0	0	0	0	0	0	0	0	0	0	0	0	0	0	0	0	0	0	0	0	0	0	0	0	0	0	0	0	0	0	0	0	0	0	0	0	0	0	0	0
VFG038072(gi:385235643)_(ABTW07_0093)_hypothetical_protein_[Capsule_(CVF775)]_[Acinetobacter_baumannii_TCDC-AB0715]	Acinetobacter_baumannii_TCDC-AB0715]	ABTW07_0093	0	0	2	0	0	0	0	0	0	0	0	0	0	0	0	0	0	0	0	0	0	0	0	0	0	0	0	0	0	0	0	0	0	0	0	0	0	0	0	0	0	0	0	0	0	0	0
VFG037967(gi:385235636)_(ABTW07_0086)_hypothetical_protein_[Capsule_(CVF775)]_[Acinetobacter_baumannii_TCDC-AB0715]	Acinetobacter_baumannii_TCDC-AB0715]	ABTW07_0086	0	0	2	0	0	0	0	0	0	0	0	0	0	0	0	0	0	0	0	0	0	0	0	0	0	0	0	0	0	0	0	0	0	0	0	0	0	0	0	0	0	0	0	0	0	0	0
VFG038115(gi:385235646)_(ABTW07_0096)_UDP-glucose_pyrophosphorylase_[Capsule_(CVF775)]_[Acinetobacter_baumannii_TCDC-AB0715]	Acinetobacter_baumannii_TCDC-AB0715]	ABTW07_0096	0	0	2	0	0	0	0	0	0	0	0	0	0	0	0	0	0	0	0	0	0	0	0	0	0	0	0	0	0	0	0	0	0	0	0	0	0	0	0	0	0	0	0	0	0	0	0
VFG037196(gi:385235622)_(plc)_phospholipase_C,_phosphocholine-specific_[Phospholipase_C_(CVF766)]_[Acinetobacter_baumannii_TCDC-AB0715]	Acinetobacter_baumannii_TCDC-AB0715]	plc	0	0	2	0	0	0	0	0	0	0	0	0	0	0	0	0	0	0	0	0	0	0	0	0	0	0	0	0	0	0	0	0	0	0	0	0	0	0	0	0	0	0	0	0	0	0	0
VFG037645(gi:385238699)_(bap)_hemolysin-type_calcium-binding_domain-containing_protein_[Biofilm-associated_protein_(CVF771)]_[Acinetobacter_baumannii_TCDC-AB0715]	Acinetobacter_baumannii_TCDC-AB0715]	bap	0	0	2	0	0	0	0	0	0	0	0	0	0	0	0	0	0	0	0	0	0	0	0	0	0	0	0	0	0	0	0	0	0	0	0	0	0	0	0	0	0	0	0	0	0	0	0
VFG038151(gi:385235649)_(ABTW07_0099)_UDP-glucose_4-epimerase_[Capsule_(CVF775)]_[Acinetobacter_baumannii_TCDC-AB0715]	Acinetobacter_baumannii_TCDC-AB0715]	ABTW07_0099	0	0	2	0	0	0	0	0	0	0	0	0	0	0	0	0	0	0	0	0	0	0	0	0	0	0	0	0	0	0	0	0	0	0	0	0	0	0	0	0	0	0	0	0	0	0	0
VFG037952(gi:385235635)_(ABTW07_0085)_hypothetical_protein_[Capsule_(CVF775)]_[Acinetobacter_baumannii_TCDC-AB0715]	Acinetobacter_baumannii_TCDC-AB0715]	ABTW07_0085	0	0	2	0	0	0	0	0	0	0	0	0	0	0	0	0	0	0	0	0	0	0	0	0	0	0	0	0	0	0	0	0	0	0	0	0	0	0	0	0	0	0	0	0	0	0	0
VFG037502(gi:385236561)_(ABTW07_1004)_hypothetical_protein_[Heme_utilization__(CVF769)]_[Acinetobacter_baumannii_TCDC-AB0715]	Acinetobacter_baumannii_TCDC-AB0715]	ABTW07_1004	0	0	2	0	0	0	0	0	0	0	0	0	0	0	0	0	0	0	0	0	0	0	0	0	0	0	0	0	0	0	0	0	0	0	0	0	0	0	0	0	0	0	0	0	0	0	0
VFG038087(gi:385235644)_(ABTW07_0094)_hypothetical_protein_[Capsule_(CVF775)]_[Acinetobacter_baumannii_TCDC-AB0715]	Acinetobacter_baumannii_TCDC-AB0715]	ABTW07_0094	0	0	2	0	0	0	0	0	0	0	0	0	0	0	0	0	0	0	0	0	0	0	0	0	0	0	0	0	0	0	0	0	0	0	0	0	0	0	0	0	0	0	0	0	0	0	0
VFG037620(gi:385238151)_(csuD)_P_pilus_assembly_protein,_porin_PapC_[Csu_pili_(CVF770)]_[Acinetobacter_baumannii_TCDC-AB0715]	Acinetobacter_baumannii_TCDC-AB0715]	csuD	0	0	2	0	0	0	0	0	0	0	0	0	0	0	0	0	0	0	0	0	0	0	0	0	0	0	0	0	0	0	0	0	0	0	0	0	0	0	0	0	0	0	0	0	0	0	0
VFG038042(gi:385235641)_(ABTW07_0091)_hypothetical_protein_[Capsule_(CVF775)]_[Acinetobacter_baumannii_TCDC-AB0715]	Acinetobacter_baumannii_TCDC-AB0715]	ABTW07_0091	0	0	2	0	0	0	0	0	0	0	0	0	0	0	0	0	0	0	0	0	0	0	0	0	0	0	0	0	0	0	0	0	0	0	0	0	0	0	0	0	0	0	0	0	0	0	0
VFG038027(gi:385235640)_(ABTW07_0090)_hypothetical_protein_[Capsule_(CVF775)]_[Acinetobacter_baumannii_TCDC-AB0715]	Acinetobacter_baumannii_TCDC-AB0715]	ABTW07_0090	0	0	2	0	0	0	0	0	0	0	0	0	0	0	0	0	0	0	0	0	0	0	0	0	0	0	0	0	0	0	0	0	0	0	0	0	0	0	0	0	0	0	0	0	0	0	0
VFG038160(gi:385235650)_(ABTW07_0100)_phosphomannomutase_[Capsule_(CVF775)]_[Acinetobacter_baumannii_TCDC-AB0715]	Acinetobacter_baumannii_TCDC-AB0715]	ABTW07_0100	0	0	2	0	0	0	0	0	0	0	0	0	0	0	0	0	0	0	0	0	0	0	0	0	0	0	0	0	0	0	0	0	0	0	0	0	0	0	0	0	0	0	0	0	0	0	0
VFG038012(gi:385235639)_(ABTW07_0089)_hypothetical_protein_[Capsule_(CVF775)]_[Acinetobacter_baumannii_TCDC-AB0715]	Acinetobacter_baumannii_TCDC-AB0715]	ABTW07_0089	0	0	2	0	0	0	0	0	0	0	0	0	0	0	0	0	0	0	0	0	0	0	0	0	0	0	0	0	0	0	0	0	0	0	0	0	0	0	0	0	0	0	0	0	0	0	0
VFG037937(gi:385235634)_(ABTW07_0084)_hypothetical_protein_[Capsule_(CVF775)]_[Acinetobacter_baumannii_TCDC-AB0715]	Acinetobacter_baumannii_TCDC-AB0715]	ABTW07_0084	0	0	2	0	0	0	0	0	0	0	0	0	0	0	0	0	0	0	0	0	0	0	0	0	0	0	0	0	0	0	0	0	0	0	0	0	0	0	0	0	0	0	0	0	0	0	0
VFG038140(gi:385235648)_(ABTW07_0098)_glucose-6-phosphate_isomerase_[Capsule_(CVF775)]_[Acinetobacter_baumannii_TCDC-AB0715]	Acinetobacter_baumannii_TCDC-AB0715]	ABTW07_0098	0	0	2	0	0	0	0	0	0	0	0	0	0	0	0	0	0	0	0	0	0	0	0	0	0	0	0	0	0	0	0	0	0	0	0	0	0	0	0	0	0	0	0	0	0	0	0
VFG038057(gi:385235642)_(ABTW07_0092)_hypothetical_protein_[Capsule_(CVF775)]_[Acinetobacter_baumannii_TCDC-AB0715]	Acinetobacter_baumannii_TCDC-AB0715]	ABTW07_0092	0	0	2	0	0	0	0	0	0	0	0	0	0	0	0	0	0	0	0	0	0	0	0	0	0	0	0	0	0	0	0	0	0	0	0	0	0	0	0	0	0	0	0	0	0	0	0
VFG038128(gi:385235647)_(ABTW07_0097)_UDP-glucose_6-dehydrogenase_[Capsule_(CVF775)]_[Acinetobacter_baumannii_TCDC-AB0715]	Acinetobacter_baumannii_TCDC-AB0715]	ABTW07_0097	0	0	2	0	0	0	0	0	0	0	0	0	0	0	0	0	0	0	0	0	0	0	0	0	0	0	0	0	0	0	0	0	0	0	0	0	0	0	0	0	0	0	0	0	0	0	0
VFG037518(gi:385236563)_(ABTW07_1006)_hypothetical_protein_[Heme_utilization__(CVF769)]_[Acinetobacter_baumannii_TCDC-AB0715]	Acinetobacter_baumannii_TCDC-AB0715]	ABTW07_1006	0	0	2	0	0	0	0	0	0	0	0	0	0	0	0	0	0	0	0	0	0	0	0	0	0	0	0	0	0	0	0	0	0	0	0	0	0	0	0	0	0	0	0	0	0	0	0
VFG037487(gi:385236559)_(ABTW07_1002)_RNA_polymerase_sigma_factor_FecI_[Heme_utilization__(CVF769)]_[Acinetobacter_baumannii_TCDC-AB0715]	Acinetobacter_baumannii_TCDC-AB0715]	ABTW07_1002	0	0	2	0	0	0	0	0	0	0	0	0	0	0	0	0	0	0	0	0	0	0	0	0	0	0	0	0	0	0	0	0	0	0	0	0	0	0	0	0	0	0	0	0	0	0	0
VFG037633(gi:385238150)_(csuE)_hypothetical_protein_[Csu_pili_(CVF770)]_[Acinetobacter_baumannii_TCDC-AB0715]	Acinetobacter_baumannii_TCDC-AB0715]	csuE	0	0	2	0	0	0	0	0	0	0	0	0	0	0	0	0	0	0	0	0	0	0	0	0	0	0	0	0	0	0	0	0	0	0	0	0	0	0	0	0	0	0	0	0	0	0	0
VFG038200(gi:385235685)_(abaI)_N-acyl-L-homoserine_lactone_synthetase_[Quorum_sensing_(CVF777)]_[Acinetobacter_baumannii_TCDC-AB0715]	Acinetobacter_baumannii_TCDC-AB0715]	abaI	0	0	2	0	0	0	0	0	0	0	0	0	0	0	0	0	0	0	0	0	0	0	0	0	0	0	0	0	0	0	0	0	0	0	0	0	0	0	0	0	0	0	0	0	0	0	0
VFG037847(gi:385237840)_(lpxD)_UDP-3-O-[3-hydroxymyristoyl]_glucosamine_N-acyltransferase_[LPS_(CVF774)]_[Acinetobacter_baumannii_TCDC-AB0715]	Acinetobacter_baumannii_TCDC-AB0715]	lpxD	0	0	2	0	0	0	0	0	0	0	0	0	0	0	0	0	0	0	0	0	0	0	0	0	0	0	0	0	0	0	0	0	0	0	0	0	0	0	0	0	0	0	0	0	0	0	0
VFG037982(gi:385235637)_(ABTW07_0087)_hypothetical_protein_[Capsule_(CVF775)]_[Acinetobacter_baumannii_TCDC-AB0715]	Acinetobacter_baumannii_TCDC-AB0715]	ABTW07_0087	0	0	2	0	0	0	0	0	0	0	0	0	0	0	0	0	0	0	0	0	0	0	0	0	0	0	0	0	0	0	0	0	0	0	0	0	0	0	0	0	0	0	0	0	0	0	0
VFG037922(gi:385235633)_(ABTW07_0083)_hypothetical_protein_[Capsule_(CVF775)]_[Acinetobacter_baumannii_TCDC-AB0715]	Acinetobacter_baumannii_TCDC-AB0715]	ABTW07_0083	0	0	2	0	0	0	0	0	0	0	0	0	0	0	0	0	0	0	0	0	0	0	0	0	0	0	0	0	0	0	0	0	0	0	0	0	0	0	0	0	0	0	0	0	0	0	0
VFG037255(gi:385238364)_(basH)_acinetobactin_biosynthesis_protein_[Acinetobactin_(CVF768)]_[Acinetobacter_baumannii_TCDC-AB0715]	Acinetobacter_baumannii_TCDC-AB0715]	basH	0	0	2	0	0	0	0	0	0	0	0	0	0	0	0	0	0	0	0	0	0	0	0	0	0	0	0	0	0	0	0	0	0	0	0	0	0	0	0	0	0	0	0	0	0	0	0
VFG038101(gi:385235645)_(ABTW07_0095)_sugar_transferase_[Capsule_(CVF775)]_[Acinetobacter_baumannii_TCDC-AB0715]	Acinetobacter_baumannii_TCDC-AB0715]	ABTW07_0095	0	0	2	0	0	0	0	0	0	0	0	0	0	0	0	0	0	0	0	0	0	0	0	0	0	0	0	0	0	0	0	0	0	0	0	0	0	0	0	0	0	0	0	0	0	0	0
VFG037395(gi:385238375)_(bauE)_ferric_acinetobactin_transport_system_ATP-binding_protein_[Acinetobactin_(CVF768)]_[Acinetobacter_baumannii_TCDC-AB0715]	Acinetobacter_baumannii_TCDC-AB0715]	bauE	0	0	2	0	0	0	0	0	0	0	0	0	0	0	0	0	0	0	0	0	0	0	0	0	0	0	0	0	0	0	0	0	0	0	0	0	0	0	0	0	0	0	0	0	0	0	0
VFG037997(gi:385235638)_(ABTW07_0088)_hypothetical_protein_[Capsule_(CVF775)]_[Acinetobacter_baumannii_TCDC-AB0715]	Acinetobacter_baumannii_TCDC-AB0715]	ABTW07_0088	0	0	2	0	0	0	0	0	0	0	0	0	0	0	0	0	0	0	0	0	0	0	0	0	0	0	0	0	0	0	0	0	0	0	0	0	0	0	0	0	0	0	0	0	0	0	0
VFG037938(gi:407930970)_(M3Q_286)_bifunctional_UDP-N-acetylglucosamine_pyrophosphorylase/glucosamine-1-phosphate_N-acetyltransferase_[Capsule_(CVF775)]_[Acinetobacter_baumannii_TYTH-1]	Acinetobacter_baumannii_TYTH-1]	M3Q_286	2	0	2	0	0	0	0	0	0	0	0	0	0	0	0	0	0	0	0	0	0	0	0	0	0	0	1	0	0	0	0	0	0	0	0	0	0	0	0	0	0	0	0	0	0	0	0
VFG038245(gi:407931632)_(bfmS)_signal_transduction_histidine_kinase_[Two-component_system_(CVF778)]_[Acinetobacter_baumannii_TYTH-1]	Acinetobacter_baumannii_TYTH-1]	bfmS	0	0	2	0	0	0	0	0	0	0	0	0	0	0	0	0	0	0	0	0	0	0	0	0	0	0	0	0	0	0	0	0	0	0	0	0	0	0	0	0	0	0	0	0	0	0	0
VFG037893(gi:407930967)_(M3Q_283)_hypothetical_protein_[Capsule_(CVF775)]_[Acinetobacter_baumannii_TYTH-1]	Acinetobacter_baumannii_TYTH-1]	M3Q_283	0	0	2	0	0	0	0	0	0	0	0	0	0	0	0	0	0	0	0	0	0	0	0	0	0	0	0	0	0	0	0	0	0	0	0	0	0	0	0	0	0	0	0	0	0	0	0
VFG037998(gi:407930974)_(M3Q_290)_hypothetical_protein_[Capsule_(CVF775)]_[Acinetobacter_baumannii_TYTH-1]	Acinetobacter_baumannii_TYTH-1]	M3Q_290	0	0	2	0	0	0	0	0	0	0	0	0	0	0	0	0	0	0	0	0	0	0	0	0	0	0	0	0	0	0	0	0	0	0	0	0	0	0	0	0	0	0	0	0	0	0	0
VFG038058(gi:407930978)_(M3Q_294)_type_1_secretion_C-terminal_target_domain_(VC_A0849_subclass)_[Capsule_(CVF775)]_[Acinetobacter_baumannii_TYTH-1]	Acinetobacter_baumannii_TYTH-1]	M3Q_294	0	0	2	0	0	0	0	0	0	0	0	0	0	0	0	0	0	0	0	0	0	0	0	0	0	0	0	0	0	0	0	0	0	0	0	0	0	0	0	0	0	0	0	0	0	0	0
VFG038141(gi:407930984)_(M3Q_300)_hypothetical_protein_[Capsule_(CVF775)]_[Acinetobacter_baumannii_TYTH-1]	Acinetobacter_baumannii_TYTH-1]	M3Q_300	0	0	2	0	0	0	0	0	0	0	0	0	0	0	0	0	0	0	0	0	0	0	0	0	0	0	0	0	0	0	0	0	0	0	0	0	0	0	0	0	0	0	0	0	0	0	0
VFG037198(gi:407930958)_(plc)_phospholipase_C_[Phospholipase_C_(CVF766)]_[Acinetobacter_baumannii_TYTH-1]	Acinetobacter_baumannii_TYTH-1]	plc	0	0	2	0	0	0	0	0	0	0	0	0	0	0	0	0	0	0	0	0	0	0	0	0	0	0	0	0	0	0	0	0	0	0	0	0	0	0	0	0	0	0	0	0	0	0	0
VFG037863(gi:407930965)_(M3Q_281)_tyrosine-protein_kinase_[Capsule_(CVF775)]_[Acinetobacter_baumannii_TYTH-1]	Acinetobacter_baumannii_TYTH-1]	M3Q_281	0	0	2	0	0	0	0	0	0	0	0	0	0	0	0	0	0	0	0	0	0	0	0	0	0	0	0	0	0	0	0	0	0	0	0	0	0	0	0	0	0	0	0	0	0	0	0
VFG038043(gi:407930977)_(M3Q_293)_aminodeoxychorismate_lyase_[Capsule_(CVF775)]_[Acinetobacter_baumannii_TYTH-1]	Acinetobacter_baumannii_TYTH-1]	M3Q_293	0	0	2	0	0	0	0	0	0	0	0	0	0	0	0	0	0	0	0	0	0	0	0	0	0	0	0	0	0	0	0	0	0	0	0	0	0	0	0	0	0	0	0	0	0	0	0
VFG037646(gi:407933844)_(bap)_hemolysin-type_calcium-binding_domain-containing_protein_[Biofilm-associated_protein_(CVF771)]_[Acinetobacter_baumannii_TYTH-1]	Acinetobacter_baumannii_TYTH-1]	bap	0	0	2	0	0	0	0	0	0	0	0	0	0	0	0	0	0	0	0	0	0	0	0	0	0	0	0	0	0	0	0	0	0	0	0	0	0	0	0	0	0	0	0	0	0	0	0
VFG037503(gi:407931892)_(M3Q_1212)_hypothetical_protein_[Heme_utilization__(CVF769)]_[Acinetobacter_baumannii_TYTH-1]	Acinetobacter_baumannii_TYTH-1]	M3Q_1212	0	0	2	0	0	0	0	0	0	0	0	0	0	0	0	0	0	0	0	0	0	0	0	0	0	0	0	0	0	0	0	0	0	0	0	0	0	0	0	0	0	0	0	0	0	0	0
VFG038013(gi:407930975)_(M3Q_291)_AraC-type_DNA-binding_domain-containing_protein_[Capsule_(CVF775)]_[Acinetobacter_baumannii_TYTH-1]	Acinetobacter_baumannii_TYTH-1]	M3Q_291	0	0	2	0	0	0	0	0	0	0	0	0	0	0	0	0	0	0	0	0	0	0	0	0	0	0	0	0	0	0	0	0	0	0	0	0	0	0	0	0	0	0	0	0	0	0	0
VFG038161(gi:407930986)_(M3Q_302)_glutamate_dehydrogenase_[Capsule_(CVF775)]_[Acinetobacter_baumannii_TYTH-1]	Acinetobacter_baumannii_TYTH-1]	M3Q_302	0	0	2	0	0	0	0	0	0	0	0	0	0	0	0	0	0	0	0	0	0	0	0	0	0	0	0	0	0	0	0	0	0	0	0	0	0	0	0	0	0	0	0	0	0	0	0
VFG038028(gi:407930976)_(M3Q_292)_ribonuclease_E_[Capsule_(CVF775)]_[Acinetobacter_baumannii_TYTH-1]	Acinetobacter_baumannii_TYTH-1]	M3Q_292	0	0	2	0	0	0	0	0	0	0	0	0	0	0	0	0	0	0	0	0	0	0	0	0	0	0	0	0	0	0	0	0	0	0	0	0	0	0	0	0	0	0	0	0	0	0	0
VFG038116(gi:407930982)_(M3Q_298)_hypothetical_protein_[Capsule_(CVF775)]_[Acinetobacter_baumannii_TYTH-1]	Acinetobacter_baumannii_TYTH-1]	M3Q_298	0	0	2	0	0	0	0	0	0	0	0	0	0	0	0	0	0	0	0	0	0	0	0	0	0	0	0	0	0	0	0	0	0	0	0	0	0	0	0	0	0	0	0	0	0	0	0
VFG037488(gi:407931890)_(M3Q_1210)_RNA_polymerase_sigma_factor_FecI_[Heme_utilization__(CVF769)]_[Acinetobacter_baumannii_TYTH-1]	Acinetobacter_baumannii_TYTH-1]	M3Q_1210	0	0	2	0	0	0	0	0	0	0	0	0	0	0	0	0	0	0	0	0	0	0	0	0	0	0	0	0	0	0	0	0	0	0	0	0	0	0	0	0	0	0	0	0	0	0	0
VFG038152(gi:407930985)_(M3Q_301)_UDP-glucose_4-epimerase_[Capsule_(CVF775)]_[Acinetobacter_baumannii_TYTH-1]	Acinetobacter_baumannii_TYTH-1]	M3Q_301	0	0	2	0	0	0	0	0	0	0	0	0	0	0	0	0	0	0	0	0	0	0	0	0	0	0	0	0	0	0	0	0	0	0	0	0	0	0	0	0	0	0	0	0	0	0	0
VFG038073(gi:407930979)_(M3Q_295)_hypothetical_protein_[Capsule_(CVF775)]_[Acinetobacter_baumannii_TYTH-1]	Acinetobacter_baumannii_TYTH-1]	M3Q_295	0	0	2	0	0	0	0	0	0	0	0	0	0	0	0	0	0	0	0	0	0	0	0	0	0	0	0	0	0	0	0	0	0	0	0	0	0	0	0	0	0	0	0	0	0	0	0
VFG038102(gi:407930981)_(M3Q_297)_hypothetical_protein_[Capsule_(CVF775)]_[Acinetobacter_baumannii_TYTH-1]	Acinetobacter_baumannii_TYTH-1]	M3Q_297	0	0	2	0	0	0	0	0	0	0	0	0	0	0	0	0	0	0	0	0	0	0	0	0	0	0	0	0	0	0	0	0	0	0	0	0	0	0	0	0	0	0	0	0	0	0	0
VFG037848(gi:407933113)_(lpxD)_UDP-3-O-[3-hydroxymyristoyl]_glucosamine_N-acyltransferase_[LPS_(CVF774)]_[Acinetobacter_baumannii_TYTH-1]	Acinetobacter_baumannii_TYTH-1]	lpxD	0	0	2	0	0	0	0	0	0	0	0	0	0	0	0	0	0	0	0	0	0	0	0	0	0	0	0	0	0	0	0	0	0	0	0	0	0	0	0	0	0	0	0	0	0	0	0
VFG038088(gi:407930980)_(M3Q_296)_hypothetical_protein_[Capsule_(CVF775)]_[Acinetobacter_baumannii_TYTH-1]	Acinetobacter_baumannii_TYTH-1]	M3Q_296	0	0	2	0	0	0	0	0	0	0	0	0	0	0	0	0	0	0	0	0	0	0	0	0	0	0	0	0	0	0	0	0	0	0	0	0	0	0	0	0	0	0	0	0	0	0	0
VFG037745(gi:407933448)_(adeH)_NodT_family_efflux_transporter_outer_membrane_lipoprotein_[AdeFGH_efflux_pump/transport_autoinducer_(CVF773)]_[Acinetobacter_baumannii_TYTH-1]	Acinetobacter_baumannii_TYTH-1]	adeH	0	0	2	0	0	0	0	0	0	0	0	0	0	0	0	0	0	0	0	0	0	0	0	0	0	0	0	0	0	0	0	0	0	0	0	0	0	0	0	0	0	0	0	0	0	0	0
VFG038129(gi:407930983)_(M3Q_299)_hypothetical_protein_[Capsule_(CVF775)]_[Acinetobacter_baumannii_TYTH-1]	Acinetobacter_baumannii_TYTH-1]	M3Q_299	0	0	2	0	0	0	0	0	0	0	0	0	0	0	0	0	0	0	0	0	0	0	0	0	0	0	0	0	0	0	0	0	0	0	0	0	0	0	0	0	0	0	0	0	0	0	0
VFG037923(gi:407930969)_(M3Q_285)_nucleoside-diphosphate_sugar_epimerase_[Capsule_(CVF775)]_[Acinetobacter_baumannii_TYTH-1]	Acinetobacter_baumannii_TYTH-1]	M3Q_285	0	0	2	0	0	0	0	0	0	0	0	0	0	0	0	0	0	0	0	0	0	0	0	0	0	0	0	0	0	0	0	0	0	0	0	0	0	0	0	0	0	0	0	0	0	0	0
VFG037953(gi:407930971)_(M3Q_287)_hypothetical_protein_[Capsule_(CVF775)]_[Acinetobacter_baumannii_TYTH-1]	Acinetobacter_baumannii_TYTH-1]	M3Q_287	0	0	2	0	0	0	0	0	0	0	0	0	0	0	0	0	0	0	0	0	0	0	0	0	0	0	0	0	0	0	0	0	0	0	0	0	0	0	0	0	0	0	0	0	0	0	0
VFG037878(gi:407930966)_(M3Q_282)_protein-tyrosine-phosphatase_[Capsule_(CVF775)]_[Acinetobacter_baumannii_TYTH-1]	Acinetobacter_baumannii_TYTH-1]	M3Q_282	0	0	2	0	0	0	0	0	0	0	0	0	0	0	0	0	0	0	0	0	0	0	0	0	0	0	0	0	0	0	0	0	0	0	0	0	0	0	0	0	0	0	0	0	0	0	0
VFG037908(gi:407930968)_(M3Q_284)_UDP-N-acetyl-D-mannosaminuronate_dehydrogenase_[Capsule_(CVF775)]_[Acinetobacter_baumannii_TYTH-1]	Acinetobacter_baumannii_TYTH-1]	M3Q_284	0	0	2	0	0	0	0	0	0	0	0	0	0	0	0	0	0	0	0	0	0	0	0	0	0	0	0	0	0	0	0	0	0	0	0	0	0	0	0	0	0	0	0	0	0	0	0
VFG038167(gi:407930987)_(M3Q_303)_hypothetical_protein_[Capsule_(CVF775)]_[Acinetobacter_baumannii_TYTH-1]	Acinetobacter_baumannii_TYTH-1]	M3Q_303	0	0	2	0	0	0	0	0	0	0	0	0	0	0	0	0	0	0	0	0	0	0	0	0	0	0	0	0	0	0	0	0	0	0	0	0	0	0	0	0	0	0	0	0	0	0	0
VFG037535(gi:407931896)_(hemO)_heme_oxygenase_[Heme_utilization__(CVF769)]_[Acinetobacter_baumannii_TYTH-1]	Acinetobacter_baumannii_TYTH-1]	hemO	0	0	2	0	0	0	0	0	0	0	0	0	0	0	0	0	0	0	0	0	0	0	0	0	0	0	0	0	0	0	0	0	0	0	0	0	0	0	0	0	0	0	0	0	0	0	0
VFG037968(gi:407930972)_(M3Q_288)_hypothetical_protein_[Capsule_(CVF775)]_[Acinetobacter_baumannii_TYTH-1]	Acinetobacter_baumannii_TYTH-1]	M3Q_288	0	0	2	0	0	0	0	0	0	0	0	0	0	0	0	0	0	0	0	0	0	0	0	0	0	0	0	0	0	0	0	0	0	0	0	0	0	0	0	0	0	0	0	0	0	0	0
VFG037983(gi:407930973)_(M3Q_289)_Sel1_repeat_protein_[Capsule_(CVF775)]_[Acinetobacter_baumannii_TYTH-1]	Acinetobacter_baumannii_TYTH-1]	M3Q_289	0	0	2	0	0	0	0	0	0	0	0	0	0	0	0	0	0	0	0	0	0	0	0	0	0	0	0	0	0	0	0	0	0	0	0	0	0	0	0	0	0	0	0	0	0	0	0
VFG038260(gi:407931185)_(pbpG)_D-alanyl-D-alanine_carboxypeptidase_[PbpG_(CVF779)]_[Acinetobacter_baumannii_TYTH-1]	Acinetobacter_baumannii_TYTH-1]	pbpG	0	0	2	0	0	0	0	0	0	0	0	0	0	0	0	0	0	0	0	0	0	0	0	0	0	0	0	0	0	0	0	0	0	0	0	0	0	0	0	0	0	0	0	0	0	0	0
VFG043765(gi:118192169)_(stx2A)_Shiga_toxin_II_subunit_A_[Stx2_(TX083)]_[Acinetobacter_haemolyticus_str._DS9B]	Acinetobacter_haemolyticus_str._DS9B]	stx2A	0	0	2	0	0	0	0	0	0	0	0	0	0	0	0	0	0	0	0	0	0	0	0	0	0	0	0	0	0	0	0	0	0	0	0	0	0	0	0	0	0	0	0	0	0	0	0
VFG043766(gi:118192170)_(stx2B)_Shiga_toxin_II_subunit_B_[Stx2_(TX083)]_[Acinetobacter_haemolyticus_str._DS9B]	Acinetobacter_haemolyticus_str._DS9B]	stx2B	0	0	2	0	0	0	0	0	0	0	0	0	0	0	0	0	0	0	0	0	0	0	0	0	0	0	0	0	0	0	0	0	0	0	0	0	0	0	0	0	0	0	0	0	0	0	0
VFG042368(gi:30230642)_(AAP21063)_autotransporter/adhesin_Aae_[Aae_(SS114)]_[Actinobacillus_actinomycetemcomitans_str._HK1651]	Actinobacillus_actinomycetemcomitans_str._HK1651]	AAP21063	0	0	2	0	0	0	0	0	0	0	0	0	0	0	0	0	0	0	0	0	0	0	0	0	0	0	0	0	0	0	0	0	0	0	0	0	0	0	0	0	0	0	0	0	0	0	0
VFG042369(gi:33578091)_(emaA)_EmaA_[extracellular_matrix_protein_adhesin_A_(EmaA)_(SS171)]_[Actinobacillus_actinomycetemcomitans_VT1169]	Actinobacillus_actinomycetemcomitans_VT1169]	emaA	0	0	2	0	0	0	0	0	0	0	0	0	0	0	0	0	0	0	0	0	0	0	0	0	0	0	0	0	0	0	0	0	0	0	0	0	0	0	0	0	0	0	0	0	0	0	0
VFG044279(gi:165977001)_(tbpB)_transferrin-binding_protein_2_precursor_[Transferrin_and_lactoferrin-mediated_iron_uptake_(IA070)]_[Actinobacillus_pleuropneumoniae_serovar_3_str._JL03]	Actinobacillus_pleuropneumoniae_serovar_3_str._JL03]	tbpB	0	0	2	0	0	0	0	0	0	0	0	0	0	0	0	0	0	0	0	0	0	0	0	0	0	0	0	0	0	0	0	0	0	0	0	0	0	0	0	0	0	0	0	0	0	0	0
VFG044278(gi:165977000)_(tbpA)_transferrin-binding_protein_1_precursor_[Transferrin_and_lactoferrin-mediated_iron_uptake_(IA070)]_[Actinobacillus_pleuropneumoniae_serovar_3_str._JL03]	Actinobacillus_pleuropneumoniae_serovar_3_str._JL03]	tbpA	0	0	2	0	0	0	0	0	0	0	0	0	0	0	0	0	0	0	0	0	0	0	0	0	0	0	0	0	0	0	0	0	0	0	0	0	0	0	0	0	0	0	0	0	0	0	0
VFG042960(gi:126208353)_(apfD)_fimbrial_leader_peptidase_[type_IV_pili_(AI119)]_[Actinobacillus_pleuropneumoniae_serovar_5b_str._L20]	Actinobacillus_pleuropneumoniae_serovar_5b_str._L20]	apfD	0	0	2	0	0	0	0	0	0	0	0	0	0	0	0	0	0	0	0	0	0	0	0	0	0	0	0	0	0	0	0	0	0	0	0	0	0	0	0	0	0	0	0	0	0	0	0
VFG042962(gi:126208355)_(apfB)_fimbrial_biogenesis_protein_[type_IV_pili_(AI119)]_[Actinobacillus_pleuropneumoniae_serovar_5b_str._L20]	Actinobacillus_pleuropneumoniae_serovar_5b_str._L20]	apfB	0	0	2	0	0	0	0	0	0	0	0	0	0	0	0	0	0	0	0	0	0	0	0	0	0	0	0	0	0	0	0	0	0	0	0	0	0	0	0	0	0	0	0	0	0	0	0
VFG042961(gi:126208354)_(apfC)_fimbrial_biogenesis_protein_[type_IV_pili_(AI119)]_[Actinobacillus_pleuropneumoniae_serovar_5b_str._L20]	Actinobacillus_pleuropneumoniae_serovar_5b_str._L20]	apfC	0	0	2	0	0	0	0	0	0	0	0	0	0	0	0	0	0	0	0	0	0	0	0	0	0	0	0	0	0	0	0	0	0	0	0	0	0	0	0	0	0	0	0	0	0	0	0
VFG042963(gi:126208356)_(apfA)_type_4_prepilin_subunit_ApfA_precursor_[type_IV_pili_(AI119)]_[Actinobacillus_pleuropneumoniae_serovar_5b_str._L20]	Actinobacillus_pleuropneumoniae_serovar_5b_str._L20]	apfA	0	0	2	0	0	0	0	0	0	0	0	0	0	0	0	0	0	0	0	0	0	0	0	0	0	0	0	0	0	0	0	0	0	0	0	0	0	0	0	0	0	0	0	0	0	0	0
VFG042999(gi:109893894)_(fimQ)_unknown_[Type_1_pili_(AI135)]_[Actinomyces_naeslundii_str._T14V]	Actinomyces_naeslundii_str._T14V]	fimQ	242	1	1	2	2	5	3	14	3	0	0	0	0	2	0	0	0	0	10	0	0	0	9	2	4	5	13	2	0	1	0	1	0	1	0	2	3	1	0	6	1	1	0	0	0	0	0
VFG043000(gi:109893895)_(fimP)_FimP_[Type_1_pili_(AI135)]_[Actinomyces_naeslundii_str._T14V]	Actinomyces_naeslundii_str._T14V]	fimP	100	0	2	1	1	1	3	2	0	0	0	0	0	0	0	0	0	0	2	0	0	0	3	1	1	1	2	0	0	1	0	0	0	0	1	0	2	0	0	4	4	0	0	0	0	0	1
VFG043001(gi:109893896)_(srtC1)_sortase_[Type_1_pili_(AI135)]_[Actinomyces_naeslundii_str._T14V]	Actinomyces_naeslundii_str._T14V]	srtC1	53	0	2	0	0	1	0	1	1	0	0	0	0	0	0	0	0	0	5	0	0	1	2	0	0	3	0	0	0	1	0	0	0	0	0	0	0	1	0	1	1	0	0	0	0	0	1
VFG043002(gi:109893897)_(fimR)_unknown_[Type_1_pili_(AI135)]_[Actinomyces_naeslundii_str._T14V]	Actinomyces_naeslundii_str._T14V]	fimR	52	0	2	2	0	1	1	1	0	0	0	0	0	0	0	0	0	0	2	0	0	0	0	0	0	1	0	0	1	0	0	0	1	0	0	0	0	0	0	1	1	0	0	0	0	0	0
VFG043003(gi:304364193)_(fimB)_surface-anchored_fimbrial_subunit_[Type_2_pili_(AI136)]_[Actinomyces_viscosus_C505]	Actinomyces_viscosus_C505]	fimB	112	0	2	0	0	3	1	5	0	0	0	0	0	0	0	0	0	2	4	0	0	0	2	0	0	2	7	0	0	0	0	0	1	0	3	0	0	0	0	1	3	0	0	0	0	0	1
VFG043005(gi:304364195)_(srtC2)_sortase_family_protein_[Type_2_pili_(AI136)]_[Actinomyces_viscosus_C505]	Actinomyces_viscosus_C505]	srtC2	91	0	2	1	0	1	0	3	0	0	0	0	0	1	0	0	0	1	7	0	0	0	1	2	0	3	2	0	0	3	0	1	1	0	0	0	0	0	0	3	0	0	0	0	0	0	0
VFG043004(gi:304364194)_(fimA)_surface-anchored_fimbrial_subunit_[Type_2_pili_(AI136)]_[Actinomyces_viscosus_C505]	Actinomyces_viscosus_C505]	fimA	85	0	2	1	1	1	0	2	2	0	0	0	0	0	0	0	0	0	8	0	0	0	3	0	0	1	1	0	0	2	0	0	1	1	0	1	1	0	0	0	1	2	1	0	0	0	0
VFG044039(gi:3283358)_(aerA)_preproaerolysin_[aerolysin_(TX455)]_[Aeromonas_enteropelogenes_str._ATCC_49659]	Aeromonas_enteropelogenes_str._ATCC_49659]	aerA	0	0	2	0	0	0	0	0	0	0	0	0	0	0	0	0	0	0	0	0	0	0	0	0	0	0	0	0	0	0	0	0	0	0	0	0	0	0	0	0	0	0	0	0	0	0	0
VFG038840(gi:507521851)_(flmH)_3-oxoacyl-ACP_reductase_[Polar_flagella_(VF0473)]_[Aeromonas_hydrophila_ML09-119]	Aeromonas_hydrophila_ML09-119]	flmH	2	0	2	0	0	0	0	0	0	0	0	0	0	0	0	0	0	0	0	0	0	0	0	0	0	0	0	0	0	0	0	0	0	0	0	0	0	0	0	0	0	0	0	0	0	0	0
VFG038561(gi:507519914)_(mshQ)_MshQ_protein_[MSHA_type_IV_pili_(VF0477)]_[Aeromonas_hydrophila_ML09-119]	Aeromonas_hydrophila_ML09-119]	mshQ	2	0	2	0	0	0	0	0	0	0	0	0	0	0	0	0	0	0	0	0	0	0	0	0	0	0	0	0	0	0	0	0	0	0	0	0	0	0	0	0	0	0	0	0	0	0	0
VFG038687(gi:507521012)_(flhF)_flagellar_biosynthesis_protein_FlhF_[Polar_flagella_(VF0473)]_[Aeromonas_hydrophila_ML09-119]	Aeromonas_hydrophila_ML09-119]	flhF	2	0	2	0	0	0	0	0	0	0	0	0	0	0	0	0	0	0	0	0	0	0	0	0	0	0	0	0	0	0	0	0	0	0	0	0	0	0	0	0	0	0	0	0	0	0	0
VFG038764(gi:507522546)_(flrA)_FleQ_protein_[Polar_flagella_(VF0473)]_[Aeromonas_hydrophila_ML09-119]	Aeromonas_hydrophila_ML09-119]	flrA	2	0	2	0	0	0	1	0	0	0	0	0	0	0	0	0	0	0	0	0	0	0	0	0	0	0	0	0	0	0	0	0	0	0	0	0	0	0	0	0	0	0	0	0	0	0	0
VFG038800(gi:507522560)_(flgD)_flagellar_hook_capping_protein_[Polar_flagella_(VF0473)]_[Aeromonas_hydrophila_ML09-119]	Aeromonas_hydrophila_ML09-119]	flgD	2	0	2	0	0	0	0	0	0	0	0	0	0	0	0	0	0	0	0	0	0	0	0	0	0	0	0	0	0	0	0	0	0	0	0	0	0	0	0	0	0	0	0	0	0	0	0
VFG038497(gi:507523386)_(tppF)_N-terminal_methylation_domain-containing_protein_[Tap_type_IV_pili_(VF0475)]_[Aeromonas_hydrophila_ML09-119]	Aeromonas_hydrophila_ML09-119]	tppF	1	0	2	0	0	0	0	0	0	0	0	0	0	0	0	0	0	0	0	0	0	0	0	0	0	0	0	0	0	0	0	0	0	0	0	0	0	0	0	0	0	0	0	0	0	0	0
VFG038796(gi:507522559)_(flgE)_flagellar_hook_protein_FlgE_[Polar_flagella_(VF0473)]_[Aeromonas_hydrophila_ML09-119]	Aeromonas_hydrophila_ML09-119]	flgE	1	0	2	0	0	0	0	0	0	0	0	0	0	0	0	0	0	0	0	0	0	0	0	0	0	0	0	0	0	0	0	0	0	0	0	0	0	0	0	0	0	0	0	0	0	0	0
VFG038780(gi:507522555)_(flgI)_flagellar_basal_body_P-ring_protein_[Polar_flagella_(VF0473)]_[Aeromonas_hydrophila_ML09-119]	Aeromonas_hydrophila_ML09-119]	flgI	1	0	2	0	0	0	0	0	0	0	0	0	0	0	0	0	0	0	0	0	0	0	0	0	0	0	0	0	0	0	0	0	0	0	0	0	0	0	0	0	0	0	0	0	0	0	0
VFG038370(gi:507521520)_(hcp)_HcpA-like_protein_[T6SS_(VF0480)]_[Aeromonas_hydrophila_ML09-119]	Aeromonas_hydrophila_ML09-119]	hcp	1	0	2	0	0	0	0	0	0	0	0	0	0	0	0	0	0	0	0	0	0	0	0	0	0	0	0	0	0	0	0	0	0	0	0	0	0	0	0	0	0	0	0	0	0	0	0
VFG038848(gi:507521398)_(flmD)_pseudaminic_acid_biosynthesis-associated_protein_PseG_[Polar_flagella_(VF0473)]_[Aeromonas_hydrophila_ML09-119]	Aeromonas_hydrophila_ML09-119]	flmD	1	0	2	0	0	0	0	0	0	0	0	0	0	0	0	0	0	0	0	0	0	0	0	0	0	0	0	0	0	0	0	0	0	0	0	0	0	0	0	0	0	0	0	0	0	0	0
VFG038368(gi:507520712)_(vgrG1)_Rhs_element_Vgr_protein_[T6SS_(VF0480)]_[Aeromonas_hydrophila_ML09-119]	Aeromonas_hydrophila_ML09-119]	vgrG1	1	0	2	0	0	0	0	0	0	0	0	0	0	0	0	0	0	0	0	0	0	0	0	0	0	0	0	0	0	0	0	0	0	0	0	0	0	0	0	0	0	0	0	0	0	0	0
VFG038611(gi:507519899)_(mshI1)_hypothetical_protein_[MSHA_type_IV_pili_(VF0477)]_[Aeromonas_hydrophila_ML09-119]	Aeromonas_hydrophila_ML09-119]	mshI1	1	0	2	0	0	0	0	0	0	0	0	0	0	0	0	0	0	0	0	0	0	0	0	0	0	0	0	0	0	0	0	0	0	0	0	0	0	0	0	0	0	0	0	0	0	0	0
VFG038691(gi:507521013)_(flhG)_CobQ/CobB/MinD/ParA_family_protein_[Polar_flagella_(VF0473)]_[Aeromonas_hydrophila_ML09-119]	Aeromonas_hydrophila_ML09-119]	flhG	1	0	2	0	0	0	0	0	0	0	0	0	0	0	0	0	0	0	0	0	0	0	0	0	0	0	0	0	0	0	0	0	0	0	0	0	0	0	0	0	0	0	0	0	0	0	0
VFG038683(gi:507521011)_(flhA)_flagellar_biosynthesis_protein_FlhA_[Polar_flagella_(VF0473)]_[Aeromonas_hydrophila_ML09-119]	Aeromonas_hydrophila_ML09-119]	flhA	1	0	2	0	0	0	0	0	0	0	0	0	0	0	0	0	0	0	0	0	0	0	0	0	0	0	0	0	0	0	0	0	0	0	0	0	0	0	0	0	0	0	0	0	0	0	0
VFG038472(gi:507522409)_(tapW)_pilus_retraction_protein_PilT_[Tap_type_IV_pili_(VF0475)]_[Aeromonas_hydrophila_ML09-119]	Aeromonas_hydrophila_ML09-119]	tapW	1	0	2	0	0	0	0	0	0	0	0	0	0	0	0	0	0	0	0	0	0	0	0	0	0	0	0	0	0	0	0	0	0	0	0	0	0	0	0	0	0	0	0	0	0	0	0
VFG038898(gi:507521195)_(ahh1)_hemolysin_[Extracellular_hemolysin,_AHH1_(CVF791)]_[Aeromonas_hydrophila_ML09-119]	Aeromonas_hydrophila_ML09-119]	ahh1	1	0	2	0	0	0	0	0	0	0	0	0	0	0	0	0	0	0	0	0	0	0	0	0	0	0	0	0	0	0	0	0	0	0	0	0	0	0	0	0	0	0	0	0	0	0	0
VFG038572(gi:507519911)_(mshD)_msha_pilin_protein_mshd_[MSHA_type_IV_pili_(VF0477)]_[Aeromonas_hydrophila_ML09-119]	Aeromonas_hydrophila_ML09-119]	mshD	1	0	2	0	0	0	0	0	0	0	0	0	0	0	0	0	0	0	0	0	0	0	0	0	0	0	0	0	0	0	0	0	0	0	0	0	0	0	0	0	0	0	0	0	0	0	0
VFG038584(gi:507519907)_(mshF)_hypothetical_protein_[MSHA_type_IV_pili_(VF0477)]_[Aeromonas_hydrophila_ML09-119]	Aeromonas_hydrophila_ML09-119]	mshF	1	0	2	0	0	0	0	0	0	0	0	0	0	0	0	0	0	0	0	0	0	0	0	0	0	0	0	0	0	0	0	0	0	0	0	0	0	0	0	0	0	0	0	0	0	0	0
VFG038366(gi:507520711)_(hcp1)_HcpA-like_protein_[T6SS_(VF0480)]_[Aeromonas_hydrophila_ML09-119]	Aeromonas_hydrophila_ML09-119]	hcp1	0	0	2	0	0	0	0	0	0	0	0	0	0	0	0	0	0	0	0	0	0	0	0	0	0	0	0	0	0	0	0	0	0	0	0	0	0	0	0	0	0	0	0	0	0	0	0
VFG038537(gi:507521135)_(flpE)_flp_pilus_assembly_protein_FlpE_[Flp_type_IV_pili_(VF0476)]_[Aeromonas_hydrophila_ML09-119]	Aeromonas_hydrophila_ML09-119]	flpE	0	0	2	0	0	0	0	0	0	0	0	0	0	0	0	0	0	0	0	0	0	0	0	0	0	0	0	0	0	0	0	0	0	0	0	0	0	0	0	0	0	0	0	0	0	0	0
VFG038851(gi:507521397)_(nueB)_pseudaminic_acid_synthase_[Polar_flagella_(VF0473)]_[Aeromonas_hydrophila_ML09-119]	Aeromonas_hydrophila_ML09-119]	nueB	0	0	2	0	0	0	0	0	0	0	0	0	0	0	0	0	0	0	0	0	0	0	0	0	0	0	0	0	0	0	0	0	0	0	0	0	0	0	0	0	0	0	0	0	0	0	0
VFG038273(gi:507520100)_(exeD)_general_secretion_pathway_protein_D_[Exe_T2SS_(VF0478)]_[Aeromonas_hydrophila_ML09-119]	Aeromonas_hydrophila_ML09-119]	exeD	0	0	2	0	0	0	0	0	0	0	0	0	0	0	0	0	0	0	0	0	0	0	0	0	0	0	0	0	0	0	0	0	0	0	0	0	0	0	0	0	0	0	0	0	0	0	0
VFG038699(gi:507521015)_(cheY)_chemotaxis_protein_CheY_[Polar_flagella_(VF0473)]_[Aeromonas_hydrophila_ML09-119]	Aeromonas_hydrophila_ML09-119]	cheY	0	0	2	0	0	0	0	0	0	0	0	0	0	0	0	0	0	0	0	0	0	0	0	0	0	0	0	0	0	0	0	0	0	0	0	0	0	0	0	0	0	0	0	0	0	0	0
VFG038913(gi:507520991)_(rtxA)_structural_toxin_protein_RtxA_[RtxA_(VF0482)]_[Aeromonas_hydrophila_ML09-119]	Aeromonas_hydrophila_ML09-119]	rtxA	0	0	2	0	0	0	0	0	0	0	0	0	0	0	0	0	0	0	0	0	0	0	0	0	0	0	0	0	0	0	0	0	0	0	0	0	0	0	0	0	0	0	0	0	0	0	0
VFG038417(gi:507520054)_(fimD)_fimbrial_chaperone_protein_[Type_I_pili_(VF0486)]_[Aeromonas_hydrophila_ML09-119]	Aeromonas_hydrophila_ML09-119]	fimD	0	0	2	0	0	0	0	0	0	0	0	0	0	0	0	0	0	0	0	0	0	0	0	0	0	0	0	0	0	0	0	0	0	0	0	0	0	0	0	0	0	0	0	0	0	0	0
VFG038432(gi:507523593)_(tapB)_type_IV-A_pilus_assembly_ATPase_PilB_[Tap_type_IV_pili_(VF0475)]_[Aeromonas_hydrophila_ML09-119]	Aeromonas_hydrophila_ML09-119]	tapB	0	0	2	0	0	0	0	0	0	0	0	0	0	0	0	0	0	0	0	0	0	0	0	0	0	0	0	0	0	0	0	0	0	0	0	0	0	0	0	0	0	0	0	0	0	0	0
VFG038905(gi:507523204)_(AHML_18530)_hemolysin_[Hemolysin_III_(CVF793)]_[Aeromonas_hydrophila_ML09-119]	Aeromonas_hydrophila_ML09-119]	AHML_18530	0	0	2	0	0	0	0	0	0	0	0	0	0	0	0	0	0	0	0	0	0	0	0	0	0	0	0	0	0	0	0	0	0	0	0	0	0	0	0	0	0	0	0	0	0	0	0
VFG038525(gi:507521138)_(flpH)_Flp_pilus_assembly_protein_TadC_[Flp_type_IV_pili_(VF0476)]_[Aeromonas_hydrophila_ML09-119]	Aeromonas_hydrophila_ML09-119]	flpH	0	0	2	0	0	0	0	0	0	0	0	0	0	0	0	0	0	0	0	0	0	0	0	0	0	0	0	0	0	0	0	0	0	0	0	0	0	0	0	0	0	0	0	0	0	0	0
VFG038784(gi:507522556)_(flgH)_flagellar_basal_body_L-ring_protein_[Polar_flagella_(VF0473)]_[Aeromonas_hydrophila_ML09-119]	Aeromonas_hydrophila_ML09-119]	flgH	0	0	2	0	0	0	0	0	0	0	0	0	0	0	0	0	0	0	0	0	0	0	0	0	0	0	0	0	0	0	0	0	0	0	0	0	0	0	0	0	0	0	0	0	0	0	0
VFG038460(gi:507522921)_(tapQ)_type_IV_pilus_secretin_PilQ_[Tap_type_IV_pili_(VF0475)]_[Aeromonas_hydrophila_ML09-119]	Aeromonas_hydrophila_ML09-119]	tapQ	0	0	2	0	0	0	0	0	0	0	0	0	0	0	0	0	0	0	0	0	0	0	0	0	0	0	0	0	0	0	0	0	0	0	0	0	0	0	0	0	0	0	0	0	0	0	0
VFG038549(gi:507521132)_(flpB)_Flp_pilus_assembly_protein_CpaB_[Flp_type_IV_pili_(VF0476)]_[Aeromonas_hydrophila_ML09-119]	Aeromonas_hydrophila_ML09-119]	flpB	0	0	2	0	0	0	0	0	0	0	0	0	0	0	0	0	0	0	0	0	0	0	0	0	0	0	0	0	0	0	0	0	0	0	0	0	0	0	0	0	0	0	0	0	0	0	0
VFG038647(gi:507521002)_(fliK)_flagellar_hook-length_control_protein_FliK_[Polar_flagella_(VF0473)]_[Aeromonas_hydrophila_ML09-119]	Aeromonas_hydrophila_ML09-119]	fliK	0	0	2	0	0	0	0	0	0	0	0	0	0	0	0	0	0	0	0	0	0	0	0	0	0	0	0	0	0	0	0	0	0	0	0	0	0	0	0	0	0	0	0	0	0	0	0
VFG038760(gi:507522545)_(flrB)_two-component_sensor_kinase_[Polar_flagella_(VF0473)]_[Aeromonas_hydrophila_ML09-119]	Aeromonas_hydrophila_ML09-119]	flrB	0	0	2	0	0	0	0	0	0	0	0	0	0	0	0	0	0	0	0	0	0	0	0	0	0	0	0	0	0	0	0	0	0	0	0	0	0	0	0	0	0	0	0	0	0	0	0
VFG038615(gi:507519898)_(mshI)_MSHA_biogenesis_protein_MshI_[MSHA_type_IV_pili_(VF0477)]_[Aeromonas_hydrophila_ML09-119]	Aeromonas_hydrophila_ML09-119]	mshI	0	0	2	0	0	0	0	0	0	0	0	0	0	0	0	0	0	0	0	0	0	0	0	0	0	0	0	0	0	0	0	0	0	0	0	0	0	0	0	0	0	0	0	0	0	0	0
VFG038635(gi:507520999)_(fliH)_flagellar_assembly_protein_FliH_[Polar_flagella_(VF0473)]_[Aeromonas_hydrophila_ML09-119]	Aeromonas_hydrophila_ML09-119]	fliH	0	0	2	0	0	0	0	0	0	0	0	0	0	0	0	0	0	0	0	0	0	0	0	0	0	0	0	0	0	0	0	0	0	0	0	0	0	0	0	0	0	0	0	0	0	0	0
VFG038521(gi:507521139)_(flpI)_Flp_pilus_assembly_protein_TadD_[Flp_type_IV_pili_(VF0476)]_[Aeromonas_hydrophila_ML09-119]	Aeromonas_hydrophila_ML09-119]	flpI	0	0	2	0	0	0	0	0	0	0	0	0	0	0	0	0	0	0	0	0	0	0	0	0	0	0	0	0	0	0	0	0	0	0	0	0	0	0	0	0	0	0	0	0	0	0	0
VFG038372(gi:507521521)_(vgrG2)_Rhs_element_Vgr_family_protein_[T6SS_(VF0480)]_[Aeromonas_hydrophila_ML09-119]	Aeromonas_hydrophila_ML09-119]	vgrG2	0	0	2	0	0	0	0	0	0	0	0	0	0	0	0	0	0	0	0	0	0	0	0	0	0	0	0	0	0	0	0	0	0	0	0	0	0	0	0	0	0	0	0	0	0	0	0
VFG038747(gi:507521391)_(flaJ)_flagellar_protein_FliS_[Polar_flagella_(VF0473)]_[Aeromonas_hydrophila_ML09-119]	Aeromonas_hydrophila_ML09-119]	flaJ	0	0	2	0	0	0	0	0	0	0	0	0	0	0	0	0	0	0	0	0	0	0	0	0	0	0	0	0	0	0	0	0	0	0	0	0	0	0	0	0	0	0	0	0	0	0	0
VFG038820(gi:507522565)_(flgA)_flagella_basal_body_P-ring_formation_protein_FlgA_[Polar_flagella_(VF0473)]_[Aeromonas_hydrophila_ML09-119]	Aeromonas_hydrophila_ML09-119]	flgA	0	0	2	0	0	0	0	0	0	0	0	0	0	0	0	0	0	0	0	0	0	0	0	0	0	0	0	0	0	0	0	0	0	0	0	0	0	0	0	0	0	0	0	0	0	0	0
VFG038317(gi:507523595)_(tapD)_prepilin_peptidase_[Exe_T2SS_(VF0478)]_[Aeromonas_hydrophila_ML09-119]	Aeromonas_hydrophila_ML09-119]	tapD	0	0	2	0	0	0	0	0	0	0	0	0	0	0	0	0	0	0	0	0	0	0	0	0	0	0	0	0	0	0	0	0	0	0	0	0	0	0	0	0	0	0	0	0	0	0	0
VFG038896(gi:507520337)_(ast)_enterotoxin_[Heat-stable_cytotonic_enterotoxin,_Ast_(CVF789)]_[Aeromonas_hydrophila_ML09-119]	Aeromonas_hydrophila_ML09-119]	ast	0	0	2	0	0	0	0	0	0	0	0	0	0	0	0	0	0	0	0	0	0	0	0	0	0	0	0	0	0	0	0	0	0	0	0	0	0	0	0	0	0	0	0	0	0	0	0
VFG038505(gi:507521454)_(tapF)_type_IV_pilus_biogenesis/stability_protein_PilW_[Tap_type_IV_pili_(VF0475)]_[Aeromonas_hydrophila_ML09-119]	Aeromonas_hydrophila_ML09-119]	tapF	0	0	2	0	0	0	0	0	0	0	0	0	0	0	0	0	0	0	0	0	0	0	0	0	0	0	0	0	0	0	0	0	0	0	0	0	0	0	0	0	0	0	0	0	0	0	0
VFG038297(gi:507520107)_(exeJ)_general_secretion_pathway_protein_J_[Exe_T2SS_(VF0478)]_[Aeromonas_hydrophila_ML09-119]	Aeromonas_hydrophila_ML09-119]	exeJ	0	0	2	0	0	0	0	0	0	0	0	0	0	0	0	0	0	0	0	0	0	0	0	0	0	0	0	0	0	0	0	0	0	0	0	0	0	0	0	0	0	0	0	0	0	0	0
VFG038675(gi:507521009)_(fliR)_flagellar_biosynthesis_protein_FliR_[Polar_flagella_(VF0473)]_[Aeromonas_hydrophila_ML09-119]	Aeromonas_hydrophila_ML09-119]	fliR	0	0	2	0	0	0	0	0	0	0	0	0	0	0	0	0	0	0	0	0	0	0	0	0	0	0	0	0	0	0	0	0	0	0	0	0	0	0	0	0	0	0	0	0	0	0	0
VFG038464(gi:507523357)_(tapT)_twitching_mobility_protein_[Tap_type_IV_pili_(VF0475)]_[Aeromonas_hydrophila_ML09-119]	Aeromonas_hydrophila_ML09-119]	tapT	0	0	2	0	0	0	0	0	0	0	0	0	0	0	0	0	0	0	0	0	0	0	0	0	0	0	0	0	0	0	0	0	0	0	0	0	0	0	0	0	0	0	0	0	0	0	0
VFG038425(gi:507520056)_(fimF)_type_I_pilus_assembly_protein_FimF_[Type_I_pili_(VF0486)]_[Aeromonas_hydrophila_ML09-119]	Aeromonas_hydrophila_ML09-119]	fimF	0	0	2	0	0	0	0	0	0	0	0	0	0	0	0	0	0	0	0	0	0	0	0	0	0	0	0	0	0	0	0	0	0	0	0	0	0	0	0	0	0	0	0	0	0	0	0
VFG038711(gi:507521018)_(cheB-2)_chemotaxis-specific_protein-glutamate_methyltransferase_[Polar_flagella_(VF0473)]_[Aeromonas_hydrophila_ML09-119]	Aeromonas_hydrophila_ML09-119]	cheB-2	0	0	2	0	0	0	0	0	0	0	0	0	0	0	0	0	0	0	0	0	0	0	0	0	0	0	0	0	0	0	0	0	0	0	0	0	0	0	0	0	0	0	0	0	0	0	0
VFG038265(gi:507523518)_(exeB)_general_secretion_pathway_protein_B_[Exe_T2SS_(VF0478)]_[Aeromonas_hydrophila_ML09-119]	Aeromonas_hydrophila_ML09-119]	exeB	0	0	2	0	0	0	0	0	0	0	0	0	0	0	0	0	0	0	0	0	0	0	0	0	0	0	0	0	0	0	0	0	0	0	0	0	0	0	0	0	0	0	0	0	0	0	0
VFG038715(gi:507521019)_(pomA)_chemotaxis_protein_MotA_[Polar_flagella_(VF0473)]_[Aeromonas_hydrophila_ML09-119]	Aeromonas_hydrophila_ML09-119]	pomA	0	0	2	0	0	0	0	0	0	0	0	0	0	0	0	0	0	0	0	0	0	0	0	0	0	0	0	0	0	0	0	0	0	0	0	0	0	0	0	0	0	0	0	0	0	0	0
VFG038756(gi:507522544)_(flrC)_transcriptional_activator_[Polar_flagella_(VF0473)]_[Aeromonas_hydrophila_ML09-119]	Aeromonas_hydrophila_ML09-119]	flrC	0	0	2	0	0	0	0	0	0	0	0	0	0	0	0	0	0	0	0	0	0	0	0	0	0	0	0	0	0	0	0	0	0	0	0	0	0	0	0	0	0	0	0	0	0	0	0
VFG038600(gi:507519902)_(mshL)_msha_biogenesis_protein_mshl_[MSHA_type_IV_pili_(VF0477)]_[Aeromonas_hydrophila_ML09-119]	Aeromonas_hydrophila_ML09-119]	mshL	0	0	2	0	0	0	0	0	0	0	0	0	0	0	0	0	0	0	0	0	0	0	0	0	0	0	0	0	0	0	0	0	0	0	0	0	0	0	0	0	0	0	0	0	0	0	0
VFG038313(gi:507520111)_(exeN)_type_II_secretion_system_protein_N_[Exe_T2SS_(VF0478)]_[Aeromonas_hydrophila_ML09-119]	Aeromonas_hydrophila_ML09-119]	exeN	0	0	2	0	0	0	0	0	0	0	0	0	0	0	0	0	0	0	0	0	0	0	0	0	0	0	0	0	0	0	0	0	0	0	0	0	0	0	0	0	0	0	0	0	0	0	0
VFG038892(gi:507519971)_(aerA/act)_hemolysin_[Aerolysin_(VF0481)]_[Aeromonas_hydrophila_ML09-119]	Aeromonas_hydrophila_ML09-119]	aerA/act	0	0	2	0	0	0	0	0	0	0	0	0	0	0	0	0	0	0	0	0	0	0	0	0	0	0	0	0	0	0	0	0	0	0	0	0	0	0	0	0	0	0	0	0	0	0	0
VFG038845(gi:507522470)_(nueA)_3-deoxy-D-manno-octulosonate_cytidylyltransferase_[Polar_flagella_(VF0473)]_[Aeromonas_hydrophila_ML09-119]	Aeromonas_hydrophila_ML09-119]	nueA	0	0	2	0	0	0	0	0	0	0	0	0	0	0	0	0	0	0	0	0	0	0	0	0	0	0	0	0	0	0	0	0	0	0	0	0	0	0	0	0	0	0	0	0	0	0	0
VFG038627(gi:507520997)_(fliF)_flagellar_MS-ring_protein_[Polar_flagella_(VF0473)]_[Aeromonas_hydrophila_ML09-119]	Aeromonas_hydrophila_ML09-119]	fliF	0	0	2	0	0	0	0	0	0	0	0	0	0	0	0	0	0	0	0	0	0	0	0	0	0	0	0	0	0	0	0	0	0	0	0	0	0	0	0	0	0	0	0	0	0	0	0
VFG038545(gi:507521133)_(flpC)_Flp_pilus_assembly_protein,_secretin_CpaC_[Flp_type_IV_pili_(VF0476)]_[Aeromonas_hydrophila_ML09-119]	Aeromonas_hydrophila_ML09-119]	flpC	0	0	2	0	0	0	0	0	0	0	0	0	0	0	0	0	0	0	0	0	0	0	0	0	0	0	0	0	0	0	0	0	0	0	0	0	0	0	0	0	0	0	0	0	0	0	0
VFG038578(gi:507519909)_(mshB)_MSHA_pilin_protein_MshA_[MSHA_type_IV_pili_(VF0477)]_[Aeromonas_hydrophila_ML09-119]	Aeromonas_hydrophila_ML09-119]	mshB	0	0	2	0	0	0	0	0	0	0	0	0	0	0	0	0	0	0	0	0	0	0	0	0	0	0	0	0	0	0	0	0	0	0	0	0	0	0	0	0	0	0	0	0	0	0	0
VFG038768(gi:507522552)_(flgL)_flagellar_hook-associated_protein_FlgL_[Polar_flagella_(VF0473)]_[Aeromonas_hydrophila_ML09-119]	Aeromonas_hydrophila_ML09-119]	flgL	0	0	2	0	0	0	0	0	0	0	0	0	0	0	0	0	0	0	0	0	0	0	0	0	0	0	0	0	0	0	0	0	0	0	0	0	0	0	0	0	0	0	0	0	0	0	0
VFG038909(gi:507522948)_(AHML_17235)_thermostable_hemolysin_[Thermostable_hemolysin_(TH)_(CVF794)]_[Aeromonas_hydrophila_ML09-119]	Aeromonas_hydrophila_ML09-119]	AHML_17235	0	0	2	0	0	0	0	0	0	0	0	0	0	0	0	0	0	0	0	0	0	0	0	0	0	0	0	0	0	0	0	0	0	0	0	0	0	0	0	0	0	0	0	0	0	0	0
VFG038828(gi:507522567)_(flgN)_flagellar_protein_FlgN_[Polar_flagella_(VF0473)]_[Aeromonas_hydrophila_ML09-119]	Aeromonas_hydrophila_ML09-119]	flgN	0	0	2	0	0	0	0	0	0	0	0	0	0	0	0	0	0	0	0	0	0	0	0	0	0	0	0	0	0	0	0	0	0	0	0	0	0	0	0	0	0	0	0	0	0	0	0
VFG038509(gi:507521142)_(flpL)_hypothetical_protein_[Flp_type_IV_pili_(VF0476)]_[Aeromonas_hydrophila_ML09-119]	Aeromonas_hydrophila_ML09-119]	flpL	0	0	2	0	0	0	0	0	0	0	0	0	0	0	0	0	0	0	0	0	0	0	0	0	0	0	0	0	0	0	0	0	0	0	0	0	0	0	0	0	0	0	0	0	0	0	0
VFG038639(gi:507521000)_(fliI)_flagellum-specific_ATP_synthase_[Polar_flagella_(VF0473)]_[Aeromonas_hydrophila_ML09-119]	Aeromonas_hydrophila_ML09-119]	fliI	0	0	2	0	0	0	0	0	0	0	0	0	0	0	0	0	0	0	0	0	0	0	0	0	0	0	0	0	0	0	0	0	0	0	0	0	0	0	0	0	0	0	0	0	0	0	0
VFG038731(gi:507521385)_(flaA)_flagellin_[Polar_flagella_(VF0473)]_[Aeromonas_hydrophila_ML09-119]	Aeromonas_hydrophila_ML09-119]	flaA	0	0	2	0	0	0	0	0	0	0	0	0	0	0	0	0	0	0	0	0	0	0	0	0	0	0	0	0	0	0	0	0	0	0	0	0	0	0	0	0	0	0	0	0	0	0	0
VFG038772(gi:507522553)_(flgK)_flagellar_hook-associated_protein_FlgK_[Polar_flagella_(VF0473)]_[Aeromonas_hydrophila_ML09-119]	Aeromonas_hydrophila_ML09-119]	flgK	0	0	2	0	0	0	0	0	0	0	0	0	0	0	0	0	0	0	0	0	0	0	0	0	0	0	0	0	0	0	0	0	0	0	0	0	0	0	0	0	0	0	0	0	0	0	0
VFG038719(gi:507521020)_(pomB)_ompA_family_protein_[Polar_flagella_(VF0473)]_[Aeromonas_hydrophila_ML09-119]	Aeromonas_hydrophila_ML09-119]	pomB	0	0	2	0	0	0	0	0	0	0	0	0	0	0	0	0	0	0	0	0	0	0	0	0	0	0	0	0	0	0	0	0	0	0	0	0	0	0	0	0	0	0	0	0	0	0	0
VFG038513(gi:507521141)_(flpK)_hypothetical_protein_[Flp_type_IV_pili_(VF0476)]_[Aeromonas_hydrophila_ML09-119]	Aeromonas_hydrophila_ML09-119]	flpK	0	0	2	0	0	0	0	0	0	0	0	0	0	0	0	0	0	0	0	0	0	0	0	0	0	0	0	0	0	0	0	0	0	0	0	0	0	0	0	0	0	0	0	0	0	0	0
VFG038659(gi:507521005)_(fliN)_flagellar_motor_switch_protein_FliN_[Polar_flagella_(VF0473)]_[Aeromonas_hydrophila_ML09-119]	Aeromonas_hydrophila_ML09-119]	fliN	0	0	2	0	0	0	0	0	0	0	0	0	0	0	0	0	0	0	0	0	0	0	0	0	0	0	0	0	0	0	0	0	0	0	0	0	0	0	0	0	0	0	0	0	0	0	0
VFG038564(gi:507519913)_(mshP)_MSHA_biogenesis_protein_MshP_[MSHA_type_IV_pili_(VF0477)]_[Aeromonas_hydrophila_ML09-119]	Aeromonas_hydrophila_ML09-119]	mshP	0	0	2	0	0	0	0	0	0	0	0	0	0	0	0	0	0	0	0	0	0	0	0	0	0	0	0	0	0	0	0	0	0	0	0	0	0	0	0	0	0	0	0	0	0	0	0
VFG038631(gi:507520998)_(fliG)_flagellar_motor_switch_protein_G_[Polar_flagella_(VF0473)]_[Aeromonas_hydrophila_ML09-119]	Aeromonas_hydrophila_ML09-119]	fliG	0	0	2	0	0	0	0	0	0	0	0	0	0	0	0	0	0	0	0	0	0	0	0	0	0	0	0	0	0	0	0	0	0	0	0	0	0	0	0	0	0	0	0	0	0	0	0
VFG038735(gi:507521388)_(flaB)_flagellin_[Polar_flagella_(VF0473)]_[Aeromonas_hydrophila_ML09-119]	Aeromonas_hydrophila_ML09-119]	flaB	0	0	2	0	0	0	0	0	0	0	0	0	0	0	0	0	0	0	0	0	0	0	0	0	0	0	0	0	0	0	0	0	0	0	0	0	0	0	0	0	0	0	0	0	0	0	0
VFG038832(gi:507523043)_(pomB2)_flagellar_motor_protein_MotB_[Polar_flagella_(VF0473)]_[Aeromonas_hydrophila_ML09-119]	Aeromonas_hydrophila_ML09-119]	pomB2	0	0	2	0	0	0	0	0	0	0	0	0	0	0	0	0	0	0	0	0	0	0	0	0	0	0	0	0	0	0	0	0	0	0	0	0	0	0	0	0	0	0	0	0	0	0	0
VFG038753(gi:507522306)_(motY)_sodium-type_flagellar_protein_MotY_[Polar_flagella_(VF0473)]_[Aeromonas_hydrophila_ML09-119]	Aeromonas_hydrophila_ML09-119]	motY	0	0	2	0	0	0	0	0	0	0	0	0	0	0	0	0	0	0	0	0	0	0	0	0	0	0	0	0	0	0	0	0	0	0	0	0	0	0	0	0	0	0	0	0	0	0	0
VFG038281(gi:507520102)_(exeF)_general_secretion_pathway_protein_F_[Exe_T2SS_(VF0478)]_[Aeromonas_hydrophila_ML09-119]	Aeromonas_hydrophila_ML09-119]	exeF	0	0	2	0	0	0	0	0	0	0	0	0	0	0	0	0	0	0	0	0	0	0	0	0	0	0	0	0	0	0	0	0	0	0	0	0	0	0	0	0	0	0	0	0	0	0	0
VFG038488(gi:507520226)_(tapY1)_type_IV_pilus_biogenesis_protein_[Tap_type_IV_pili_(VF0475)]_[Aeromonas_hydrophila_ML09-119]	Aeromonas_hydrophila_ML09-119]	tapY1	0	0	2	0	0	0	0	0	0	0	0	0	0	0	0	0	0	0	0	0	0	0	0	0	0	0	0	0	0	0	0	0	0	0	0	0	0	0	0	0	0	0	0	0	0	0	0
VFG038413(gi:507520053)_(fimC)_outer_membrane_usher_protein_[Type_I_pili_(VF0486)]_[Aeromonas_hydrophila_ML09-119]	Aeromonas_hydrophila_ML09-119]	fimC	0	0	2	0	0	0	0	0	0	0	0	0	0	0	0	0	0	0	0	0	0	0	0	0	0	0	0	0	0	0	0	0	0	0	0	0	0	0	0	0	0	0	0	0	0	0	0
VFG038596(gi:507519903)_(mshM)_general_secretion_pathway_protein_A_[MSHA_type_IV_pili_(VF0477)]_[Aeromonas_hydrophila_ML09-119]	Aeromonas_hydrophila_ML09-119]	mshM	0	0	2	0	0	0	0	0	0	0	0	0	0	0	0	0	0	0	0	0	0	0	0	0	0	0	0	0	0	0	0	0	0	0	0	0	0	0	0	0	0	0	0	0	0	0	0
VFG038261(gi:507523517)_(exeA)_general_secretion_pathway_protein_A_[Exe_T2SS_(VF0478)]_[Aeromonas_hydrophila_ML09-119]	Aeromonas_hydrophila_ML09-119]	exeA	0	0	2	0	0	0	0	0	0	0	0	0	0	0	0	0	0	0	0	0	0	0	0	0	0	0	0	0	0	0	0	0	0	0	0	0	0	0	0	0	0	0	0	0	0	0	0
VFG038707(gi:507521017)_(cheA-2)_chemotaxis_protein_CheA_[Polar_flagella_(VF0473)]_[Aeromonas_hydrophila_ML09-119]	Aeromonas_hydrophila_ML09-119]	cheA-2	0	0	2	0	0	0	0	0	0	0	0	0	0	0	0	0	0	0	0	0	0	0	0	0	0	0	0	0	0	0	0	0	0	0	0	0	0	0	0	0	0	0	0	0	0	0	0
VFG038679(gi:507521010)_(flhB)_flagellar_biosynthetic_protein_FlhB_[Polar_flagella_(VF0473)]_[Aeromonas_hydrophila_ML09-119]	Aeromonas_hydrophila_ML09-119]	flhB	0	0	2	0	0	0	0	0	0	0	0	0	0	0	0	0	0	0	0	0	0	0	0	0	0	0	0	0	0	0	0	0	0	0	0	0	0	0	0	0	0	0	0	0	0	0	0
VFG038619(gi:507520195)_(motX)_sodium-type_flagellar_motor_component_[Polar_flagella_(VF0473)]_[Aeromonas_hydrophila_ML09-119]	Aeromonas_hydrophila_ML09-119]	motX	0	0	2	0	0	0	0	0	0	0	0	0	0	0	0	0	0	0	0	0	0	0	0	0	0	0	0	0	0	0	0	0	0	0	0	0	0	0	0	0	0	0	0	0	0	0	0
VFG038444(gi:507522925)_(tapM)_type_IV_pilus_assembly_protein_PilM_[Tap_type_IV_pili_(VF0475)]_[Aeromonas_hydrophila_ML09-119]	Aeromonas_hydrophila_ML09-119]	tapM	0	0	2	0	0	0	0	0	0	0	0	0	0	0	0	0	0	0	0	0	0	0	0	0	0	0	0	0	0	0	0	0	0	0	0	0	0	0	0	0	0	0	0	0	0	0	0
VFG038529(gi:507521137)_(flpG)_Flp_pilus_assembly_protein_TadB_[Flp_type_IV_pili_(VF0476)]_[Aeromonas_hydrophila_ML09-119]	Aeromonas_hydrophila_ML09-119]	flpG	0	0	2	0	0	0	0	0	0	0	0	0	0	0	0	0	0	0	0	0	0	0	0	0	0	0	0	0	0	0	0	0	0	0	0	0	0	0	0	0	0	0	0	0	0	0	0
VFG038269(gi:507520099)_(exeC)_general_secretion_pathway_protein_C_[Exe_T2SS_(VF0478)]_[Aeromonas_hydrophila_ML09-119]	Aeromonas_hydrophila_ML09-119]	exeC	0	0	2	0	0	0	0	0	0	0	0	0	0	0	0	0	0	0	0	0	0	0	0	0	0	0	0	0	0	0	0	0	0	0	0	0	0	0	0	0	0	0	0	0	0	0	0
VFG038301(gi:507520108)_(exeK)_general_secretion_pathway_protein_K_[Exe_T2SS_(VF0478)]_[Aeromonas_hydrophila_ML09-119]	Aeromonas_hydrophila_ML09-119]	exeK	0	0	2	0	0	0	0	0	0	0	0	0	0	0	0	0	0	0	0	0	0	0	0	0	0	0	0	0	0	0	0	0	0	0	0	0	0	0	0	0	0	0	0	0	0	0	0
VFG038476(gi:507520227)_(tppA)_type_IV_pilin_[Tap_type_IV_pili_(VF0475)]_[Aeromonas_hydrophila_ML09-119]	Aeromonas_hydrophila_ML09-119]	tppA	0	0	2	0	0	0	0	0	0	0	0	0	0	0	0	0	0	0	0	0	0	0	0	0	0	0	0	0	0	0	0	0	0	0	0	0	0	0	0	0	0	0	0	0	0	0	0
VFG038277(gi:507520101)_(exeE)_general_secretory_pathway_protein_E_[Exe_T2SS_(VF0478)]_[Aeromonas_hydrophila_ML09-119]	Aeromonas_hydrophila_ML09-119]	exeE	0	0	2	0	0	0	0	0	0	0	0	0	0	0	0	0	0	0	0	0	0	0	0	0	0	0	0	0	0	0	0	0	0	0	0	0	0	0	0	0	0	0	0	0	0	0	0
VFG038590(gi:507519905)_(mshE)_type_IV_pilin_[MSHA_type_IV_pili_(VF0477)]_[Aeromonas_hydrophila_ML09-119]	Aeromonas_hydrophila_ML09-119]	mshE	0	0	2	0	0	0	0	0	0	0	0	0	0	0	0	0	0	0	0	0	0	0	0	0	0	0	0	0	0	0	0	0	0	0	0	0	0	0	0	0	0	0	0	0	0	0	0
VFG038743(gi:507521390)_(flaH)_flagellar_hook-associated_protein_2_[Polar_flagella_(VF0473)]_[Aeromonas_hydrophila_ML09-119]	Aeromonas_hydrophila_ML09-119]	flaH	0	0	2	0	0	0	0	0	0	0	0	0	0	0	0	0	0	0	0	0	0	0	0	0	0	0	0	0	0	0	0	0	0	0	0	0	0	0	0	0	0	0	0	0	0	0	0
VFG038667(gi:507521007)_(fliP)_flagellar_biosynthesis_protein_FliP_[Polar_flagella_(VF0473)]_[Aeromonas_hydrophila_ML09-119]	Aeromonas_hydrophila_ML09-119]	fliP	0	0	2	0	0	0	0	0	0	0	0	0	0	0	0	0	0	0	0	0	0	0	0	0	0	0	0	0	0	0	0	0	0	0	0	0	0	0	0	0	0	0	0	0	0	0	0
VFG038568(gi:507519912)_(mshO)_msha_biogenesis_protein_msho_[MSHA_type_IV_pili_(VF0477)]_[Aeromonas_hydrophila_ML09-119]	Aeromonas_hydrophila_ML09-119]	mshO	0	0	2	0	0	0	0	0	0	0	0	0	0	0	0	0	0	0	0	0	0	0	0	0	0	0	0	0	0	0	0	0	0	0	0	0	0	0	0	0	0	0	0	0	0	0	0
VFG038501(gi:507522345)_(tapV)_motility_protein_FimV_[Tap_type_IV_pili_(VF0475)]_[Aeromonas_hydrophila_ML09-119]	Aeromonas_hydrophila_ML09-119]	tapV	0	0	2	0	0	0	0	0	0	0	0	0	0	0	0	0	0	0	0	0	0	0	0	0	0	0	0	0	0	0	0	0	0	0	0	0	0	0	0	0	0	0	0	0	0	0	0
VFG038468(gi:507523358)_(tapU)_twitching_motility_protein_PilU_[Tap_type_IV_pili_(VF0475)]_[Aeromonas_hydrophila_ML09-119]	Aeromonas_hydrophila_ML09-119]	tapU	0	0	2	0	0	0	0	0	0	0	0	0	0	0	0	0	0	0	0	0	0	0	0	0	0	0	0	0	0	0	0	0	0	0	0	0	0	0	0	0	0	0	0	0	0	0	0
VFG038740(gi:507521389)_(flaG)_flagellar_protein_FlaG_[Polar_flagella_(VF0473)]_[Aeromonas_hydrophila_ML09-119]	Aeromonas_hydrophila_ML09-119]	flaG	0	0	2	0	0	0	0	0	0	0	0	0	0	0	0	0	0	0	0	0	0	0	0	0	0	0	0	0	0	0	0	0	0	0	0	0	0	0	0	0	0	0	0	0	0	0	0
VFG038587(gi:507519906)_(mshG)_GspF_family_protein_[MSHA_type_IV_pili_(VF0477)]_[Aeromonas_hydrophila_ML09-119]	Aeromonas_hydrophila_ML09-119]	mshG	0	0	2	0	0	0	0	0	0	0	0	0	0	0	0	0	0	0	0	0	0	0	0	0	0	0	0	0	0	0	0	0	0	0	0	0	0	0	0	0	0	0	0	0	0	0	0
VFG038452(gi:507522923)_(tapO)_type_IV_pilus_biogenesis_protein_PilO_[Tap_type_IV_pili_(VF0475)]_[Aeromonas_hydrophila_ML09-119]	Aeromonas_hydrophila_ML09-119]	tapO	0	0	2	0	0	0	0	0	0	0	0	0	0	0	0	0	0	0	0	0	0	0	0	0	0	0	0	0	0	0	0	0	0	0	0	0	0	0	0	0	0	0	0	0	0	0	0
VFG038305(gi:507520109)_(exeL)_general_secretion_pathway_protein_L_[Exe_T2SS_(VF0478)]_[Aeromonas_hydrophila_ML09-119]	Aeromonas_hydrophila_ML09-119]	exeL	0	0	2	0	0	0	0	0	0	0	0	0	0	0	0	0	0	0	0	0	0	0	0	0	0	0	0	0	0	0	0	0	0	0	0	0	0	0	0	0	0	0	0	0	0	0	0
VFG038901(gi:507522530)_(hlyA)_transporter_[Hemolysin,_HlyA_(CVF792)]_[Aeromonas_hydrophila_ML09-119]	Aeromonas_hydrophila_ML09-119]	hlyA	0	0	2	0	0	0	0	0	0	0	0	0	0	0	0	0	0	0	0	0	0	0	0	0	0	0	0	0	0	0	0	0	0	0	0	0	0	0	0	0	0	0	0	0	0	0	0
VFG038816(gi:507522564)_(cheV)_CheV_[Polar_flagella_(VF0473)]_[Aeromonas_hydrophila_ML09-119]	Aeromonas_hydrophila_ML09-119]	cheV	0	0	2	0	0	0	0	0	0	0	0	0	0	0	0	0	0	0	0	0	0	0	0	0	0	0	0	0	0	0	0	0	0	0	0	0	0	0	0	0	0	0	0	0	0	0	0
VFG038517(gi:507521140)_(flpJ)_hypothetical_protein_[Flp_type_IV_pili_(VF0476)]_[Aeromonas_hydrophila_ML09-119]	Aeromonas_hydrophila_ML09-119]	flpJ	0	0	2	0	0	0	0	0	0	0	0	0	0	0	0	0	0	0	0	0	0	0	0	0	0	0	0	0	0	0	0	0	0	0	0	0	0	0	0	0	0	0	0	0	0	0	0
VFG038541(gi:507521134)_(flpD)_hypothetical_protein_[Flp_type_IV_pili_(VF0476)]_[Aeromonas_hydrophila_ML09-119]	Aeromonas_hydrophila_ML09-119]	flpD	0	0	2	0	0	0	0	0	0	0	0	0	0	0	0	0	0	0	0	0	0	0	0	0	0	0	0	0	0	0	0	0	0	0	0	0	0	0	0	0	0	0	0	0	0	0	0
VFG038593(gi:507519904)_(mshN)_hypothetical_protein_[MSHA_type_IV_pili_(VF0477)]_[Aeromonas_hydrophila_ML09-119]	Aeromonas_hydrophila_ML09-119]	mshN	0	0	2	0	0	0	0	0	0	0	0	0	0	0	0	0	0	0	0	0	0	0	0	0	0	0	0	0	0	0	0	0	0	0	0	0	0	0	0	0	0	0	0	0	0	0	0
VFG038421(gi:507520055)_(fimE)_type_I_pilus_assembly_protein_FimE_[Type_I_pili_(VF0486)]_[Aeromonas_hydrophila_ML09-119]	Aeromonas_hydrophila_ML09-119]	fimE	0	0	2	0	0	0	0	0	0	0	0	0	0	0	0	0	0	0	0	0	0	0	0	0	0	0	0	0	0	0	0	0	0	0	0	0	0	0	0	0	0	0	0	0	0	0	0
VFG038581(gb|YP_008041522)_(mshA)_MSHA_(mannose-sensitive_hemagglutinin)_pili_major_prepilin_protein_MshA_[MSHA_type_IV_pili_(VF0477)]_[Aeromonas_hydrophila_ML09-119]	Aeromonas_hydrophila_ML09-119]	mshA	0	0	2	0	0	0	0	0	0	0	0	0	0	0	0	0	0	0	0	0	0	0	0	0	0	0	0	0	0	0	0	0	0	0	0	0	0	0	0	0	0	0	0	0	0	0	0
VFG038655(gi:507521004)_(fliM)_flagellar_motor_switch_protein_FliM_[Polar_flagella_(VF0473)]_[Aeromonas_hydrophila_ML09-119]	Aeromonas_hydrophila_ML09-119]	fliM	0	0	2	0	0	0	0	0	0	0	0	0	0	0	0	0	0	0	0	0	0	0	0	0	0	0	0	0	0	0	0	0	0	0	0	0	0	0	0	0	0	0	0	0	0	0	0
VFG038576(gi:507519910)_(mshC)_msha_pilin_protein_mshc_[MSHA_type_IV_pili_(VF0477)]_[Aeromonas_hydrophila_ML09-119]	Aeromonas_hydrophila_ML09-119]	mshC	0	0	2	0	0	0	0	0	0	0	0	0	0	0	0	0	0	0	0	0	0	0	0	0	0	0	0	0	0	0	0	0	0	0	0	0	0	0	0	0	0	0	0	0	0	0	0
VFG038436(gi:507523594)_(tapC)_type_4_fimbrial_assembly_protein_PilC_[Tap_type_IV_pili_(VF0475)]_[Aeromonas_hydrophila_ML09-119]	Aeromonas_hydrophila_ML09-119]	tapC	0	0	2	0	0	0	0	0	0	0	0	0	0	0	0	0	0	0	0	0	0	0	0	0	0	0	0	0	0	0	0	0	0	0	0	0	0	0	0	0	0	0	0	0	0	0	0
VFG038663(gi:507521006)_(fliO)_flagellar_biosynthesis_protein,_FliO_[Polar_flagella_(VF0473)]_[Aeromonas_hydrophila_ML09-119]	Aeromonas_hydrophila_ML09-119]	fliO	0	0	2	0	0	0	0	0	0	0	0	0	0	0	0	0	0	0	0	0	0	0	0	0	0	0	0	0	0	0	0	0	0	0	0	0	0	0	0	0	0	0	0	0	0	0	0
VFG038836(gi:507523044)_(pomA2)_chemotaxis_protein_PomA_[Polar_flagella_(VF0473)]_[Aeromonas_hydrophila_ML09-119]	Aeromonas_hydrophila_ML09-119]	pomA2	0	0	2	0	0	0	0	0	0	0	0	0	0	0	0	0	0	0	0	0	0	0	0	0	0	0	0	0	0	0	0	0	0	0	0	0	0	0	0	0	0	0	0	0	0	0	0
VFG038792(gi:507522558)_(flgF)_flagellar_basal-body_rod_protein_FlgF_[Polar_flagella_(VF0473)]_[Aeromonas_hydrophila_ML09-119]	Aeromonas_hydrophila_ML09-119]	flgF	0	0	2	0	0	0	0	0	0	0	0	0	0	0	0	0	0	0	0	0	0	0	0	0	0	0	0	0	0	0	0	0	0	0	0	0	0	0	0	0	0	0	0	0	0	0	0
VFG038409(gi:507520051)_(fimA)_fimbrial_protein_[Type_I_pili_(VF0486)]_[Aeromonas_hydrophila_ML09-119]	Aeromonas_hydrophila_ML09-119]	fimA	0	0	2	0	0	0	0	0	0	0	0	0	0	0	0	0	0	0	0	0	0	0	0	0	0	0	0	0	0	0	0	0	0	0	0	0	0	0	0	0	0	0	0	0	0	0	0
VFG038607(gi:507519900)_(mshJ)_msha_biogenesis_protein_mshj_[MSHA_type_IV_pili_(VF0477)]_[Aeromonas_hydrophila_ML09-119]	Aeromonas_hydrophila_ML09-119]	mshJ	0	0	2	0	0	0	0	0	0	0	0	0	0	0	0	0	0	0	0	0	0	0	0	0	0	0	0	0	0	0	0	0	0	0	0	0	0	0	0	0	0	0	0	0	0	0	0
VFG038651(gi:507521003)_(fliL)_flagellar_basal_body-associated_protein_FliL_[Polar_flagella_(VF0473)]_[Aeromonas_hydrophila_ML09-119]	Aeromonas_hydrophila_ML09-119]	fliL	0	0	2	0	0	0	0	0	0	0	0	0	0	0	0	0	0	0	0	0	0	0	0	0	0	0	0	0	0	0	0	0	0	0	0	0	0	0	0	0	0	0	0	0	0	0	0
VFG038723(gi:507521021)_(AHML_07520)_CobQ/CobB/MinD/ParA_family_protein_[Polar_flagella_(VF0473)]_[Aeromonas_hydrophila_ML09-119]	Aeromonas_hydrophila_ML09-119]	AHML_07520	0	0	2	0	0	0	0	0	0	0	0	0	0	0	0	0	0	0	0	0	0	0	0	0	0	0	0	0	0	0	0	0	0	0	0	0	0	0	0	0	0	0	0	0	0	0	0
VFG038808(gi:507522562)_(flgB)_flagellar_basal-body_rod_protein_FlgB_[Polar_flagella_(VF0473)]_[Aeromonas_hydrophila_ML09-119]	Aeromonas_hydrophila_ML09-119]	flgB	0	0	2	0	0	0	0	0	0	0	0	0	0	0	0	0	0	0	0	0	0	0	0	0	0	0	0	0	0	0	0	0	0	0	0	0	0	0	0	0	0	0	0	0	0	0	0
VFG038448(gi:507522924)_(tapN)_type_IV_pilus_biogenesis_PilN_[Tap_type_IV_pili_(VF0475)]_[Aeromonas_hydrophila_ML09-119]	Aeromonas_hydrophila_ML09-119]	tapN	0	0	2	0	0	0	0	0	0	0	0	0	0	0	0	0	0	0	0	0	0	0	0	0	0	0	0	0	0	0	0	0	0	0	0	0	0	0	0	0	0	0	0	0	0	0	0
VFG038553(gi:507521131)_(flpA)_leader_peptidase_PilD_[Flp_type_IV_pili_(VF0476)]_[Aeromonas_hydrophila_ML09-119]	Aeromonas_hydrophila_ML09-119]	flpA	0	0	2	0	0	0	0	0	0	0	0	0	0	0	0	0	0	0	0	0	0	0	0	0	0	0	0	0	0	0	0	0	0	0	0	0	0	0	0	0	0	0	0	0	0	0	0
VFG038309(gi:507520110)_(exeM)_general_secretion_pathway_protein_M_[Exe_T2SS_(VF0478)]_[Aeromonas_hydrophila_ML09-119]	Aeromonas_hydrophila_ML09-119]	exeM	0	0	2	0	0	0	0	0	0	0	0	0	0	0	0	0	0	0	0	0	0	0	0	0	0	0	0	0	0	0	0	0	0	0	0	0	0	0	0	0	0	0	0	0	0	0	0
VFG038727(gi:507521022)_(cheW)_chemotaxis_protein_CheW_[Polar_flagella_(VF0473)]_[Aeromonas_hydrophila_ML09-119]	Aeromonas_hydrophila_ML09-119]	cheW	0	0	2	0	0	0	0	0	0	0	0	0	0	0	0	0	0	0	0	0	0	0	0	0	0	0	0	0	0	0	0	0	0	0	0	0	0	0	0	0	0	0	0	0	0	0	0
VFG038533(gi:507521136)_(flpF)_flp_pilus_assembly_protein_FlpF_[Flp_type_IV_pili_(VF0476)]_[Aeromonas_hydrophila_ML09-119]	Aeromonas_hydrophila_ML09-119]	flpF	0	0	2	0	0	0	0	0	0	0	0	0	0	0	0	0	0	0	0	0	0	0	0	0	0	0	0	0	0	0	0	0	0	0	0	0	0	0	0	0	0	0	0	0	0	0	0
VFG038603(gb|YP_008041515)_(mshK)_MSHA_(mannose-sensitive_hemagglutinin)_pili_biogenesis_protein_MshK,_periplasmic_protein,_GspC-like_[MSHA_type_IV_pili_(VF0477)]_[Aeromonas_hydrophila_ML09-119]	Aeromonas_hydrophila_ML09-119]	mshK	0	0	2	0	0	0	0	0	0	0	0	0	0	0	0	0	0	0	0	0	0	0	0	0	0	0	0	0	0	0	0	0	0	0	0	0	0	0	0	0	0	0	0	0	0	0	0
VFG038493(gi:507520222)_(tppE)_type_IV_pilin_[Tap_type_IV_pili_(VF0475)]_[Aeromonas_hydrophila_ML09-119]	Aeromonas_hydrophila_ML09-119]	tppE	0	0	2	0	0	0	0	0	0	0	0	0	0	0	0	0	0	0	0	0	0	0	0	0	0	0	0	0	0	0	0	0	0	0	0	0	0	0	0	0	0	0	0	0	0	0	0
VFG038804(gi:507522561)_(flgC)_flagellar_basal_body_rod_protein_FlgC_[Polar_flagella_(VF0473)]_[Aeromonas_hydrophila_ML09-119]	Aeromonas_hydrophila_ML09-119]	flgC	0	0	2	0	0	0	0	0	0	0	0	0	0	0	0	0	0	0	0	0	0	0	0	0	0	0	0	0	0	0	0	0	0	0	0	0	0	0	0	0	0	0	0	0	0	0	0
VFG038289(gi:507520105)_(exeH)_general_secretion_pathway_protein_H_[Exe_T2SS_(VF0478)]_[Aeromonas_hydrophila_ML09-119]	Aeromonas_hydrophila_ML09-119]	exeH	0	0	2	0	0	0	0	0	0	0	0	0	0	0	0	0	0	0	0	0	0	0	0	0	0	0	0	0	0	0	0	0	0	0	0	0	0	0	0	0	0	0	0	0	0	0	0
VFG038695(gi:507521014)_(fliA)_flagellar_biosynthesis_sigma_factor_[Polar_flagella_(VF0473)]_[Aeromonas_hydrophila_ML09-119]	Aeromonas_hydrophila_ML09-119]	fliA	0	0	2	0	0	0	0	0	0	0	0	0	0	0	0	0	0	0	0	0	0	0	0	0	0	0	0	0	0	0	0	0	0	0	0	0	0	0	0	0	0	0	0	0	0	0	0
VFG038456(gi:507522922)_(tapP)_type_IV_pilus_biogenesis_protein_PilP_[Tap_type_IV_pili_(VF0475)]_[Aeromonas_hydrophila_ML09-119]	Aeromonas_hydrophila_ML09-119]	tapP	0	0	2	0	0	0	0	0	0	0	0	0	0	0	0	0	0	0	0	0	0	0	0	0	0	0	0	0	0	0	0	0	0	0	0	0	0	0	0	0	0	0	0	0	0	0	0
VFG038293(gi:507520106)_(exeI)_general_secretion_pathway_protein_I_[Exe_T2SS_(VF0478)]_[Aeromonas_hydrophila_ML09-119]	Aeromonas_hydrophila_ML09-119]	exeI	0	0	2	0	0	0	0	0	0	0	0	0	0	0	0	0	0	0	0	0	0	0	0	0	0	0	0	0	0	0	0	0	0	0	0	0	0	0	0	0	0	0	0	0	0	0	0
VFG038703(gi:507521016)_(cheZ)_chemotaxis_protein_CheZ_[Polar_flagella_(VF0473)]_[Aeromonas_hydrophila_ML09-119]	Aeromonas_hydrophila_ML09-119]	cheZ	0	0	2	0	0	0	0	0	0	0	0	0	0	0	0	0	0	0	0	0	0	0	0	0	0	0	0	0	0	0	0	0	0	0	0	0	0	0	0	0	0	0	0	0	0	0	0
VFG038776(gi:507522554)_(flgJ)_flagellar_rod_assembly_protein/muramidase_FlgJ_[Polar_flagella_(VF0473)]_[Aeromonas_hydrophila_ML09-119]	Aeromonas_hydrophila_ML09-119]	flgJ	0	0	2	0	0	0	0	0	0	0	0	0	0	0	0	0	0	0	0	0	0	0	0	0	0	0	0	0	0	0	0	0	0	0	0	0	0	0	0	0	0	0	0	0	0	0	0
VFG038812(gi:507522563)_(cheR-3)_chemotaxis_protein_CheR_[Polar_flagella_(VF0473)]_[Aeromonas_hydrophila_ML09-119]	Aeromonas_hydrophila_ML09-119]	cheR-3	0	0	2	0	0	0	0	0	0	0	0	0	0	0	0	0	0	0	0	0	0	0	0	0	0	0	0	0	0	0	0	0	0	0	0	0	0	0	0	0	0	0	0	0	0	0	0
VFG038788(gi:507522557)_(flgG)_flagellar_basal_body_rod_protein_FlgG_[Polar_flagella_(VF0473)]_[Aeromonas_hydrophila_ML09-119]	Aeromonas_hydrophila_ML09-119]	flgG	0	0	2	0	0	0	0	0	0	0	0	0	0	0	0	0	0	0	0	0	0	0	0	0	0	0	0	0	0	0	0	0	0	0	0	0	0	0	0	0	0	0	0	0	0	0	0
VFG038429(gi:507523592)_(tapA)_type_IV_prepilin_TapA_[Tap_type_IV_pili_(VF0475)]_[Aeromonas_hydrophila_ML09-119]	Aeromonas_hydrophila_ML09-119]	tapA	0	0	2	0	0	0	0	0	0	0	0	0	0	0	0	0	0	0	0	0	0	0	0	0	0	0	0	0	0	0	0	0	0	0	0	0	0	0	0	0	0	0	0	0	0	0	0
VFG038480(gi:507520223)_(tppB)_type_IV_pilus_modification_protein_PilV_[Tap_type_IV_pili_(VF0475)]_[Aeromonas_hydrophila_ML09-119]	Aeromonas_hydrophila_ML09-119]	tppB	0	0	2	0	0	0	0	0	0	0	0	0	0	0	0	0	0	0	0	0	0	0	0	0	0	0	0	0	0	0	0	0	0	0	0	0	0	0	0	0	0	0	0	0	0	0	0
VFG038557(gi:507521130)_(flp1)_Flp/Fap_pilin_component_superfamily_protein_[Flp_type_IV_pili_(VF0476)]_[Aeromonas_hydrophila_ML09-119]	Aeromonas_hydrophila_ML09-119]	flp1	0	0	2	0	0	0	0	0	0	0	0	0	0	0	0	0	0	0	0	0	0	0	0	0	0	0	0	0	0	0	0	0	0	0	0	0	0	0	0	0	0	0	0	0	0	0	0
VFG038643(gi:507521001)_(fliJ)_flagellar_export_protein_FliJ_[Polar_flagella_(VF0473)]_[Aeromonas_hydrophila_ML09-119]	Aeromonas_hydrophila_ML09-119]	fliJ	0	0	2	0	0	0	0	0	0	0	0	0	0	0	0	0	0	0	0	0	0	0	0	0	0	0	0	0	0	0	0	0	0	0	0	0	0	0	0	0	0	0	0	0	0	0	0
VFG038285(gi:507520103)_(exeG)_general_secretion_pathway_protein_G_[Exe_T2SS_(VF0478)]_[Aeromonas_hydrophila_ML09-119]	Aeromonas_hydrophila_ML09-119]	exeG	0	0	2	0	0	0	0	0	0	0	0	0	0	0	0	0	0	0	0	0	0	0	0	0	0	0	0	0	0	0	0	0	0	0	0	0	0	0	0	0	0	0	0	0	0	0	0
VFG038623(gi:507520996)_(fliE)_flagellar_hook-basal_body_complex_protein_FliE_[Polar_flagella_(VF0473)]_[Aeromonas_hydrophila_ML09-119]	Aeromonas_hydrophila_ML09-119]	fliE	0	0	2	0	0	0	0	0	0	0	0	0	0	0	0	0	0	0	0	0	0	0	0	0	0	0	0	0	0	0	0	0	0	0	0	0	0	0	0	0	0	0	0	0	0	0	0
VFG038671(gi:507521008)_(fliQ)_flagellar_biosynthetic_protein_FliQ_[Polar_flagella_(VF0473)]_[Aeromonas_hydrophila_ML09-119]	Aeromonas_hydrophila_ML09-119]	fliQ	0	0	2	0	0	0	0	0	0	0	0	0	0	0	0	0	0	0	0	0	0	0	0	0	0	0	0	0	0	0	0	0	0	0	0	0	0	0	0	0	0	0	0	0	0	0	0
VFG038824(gi:507522566)_(flgM)_anti-sigma-D_factor_[Polar_flagella_(VF0473)]_[Aeromonas_hydrophila_ML09-119]	Aeromonas_hydrophila_ML09-119]	flgM	0	0	2	0	0	0	0	0	0	0	0	0	0	0	0	0	0	0	0	0	0	0	0	0	0	0	0	0	0	0	0	0	0	0	0	0	0	0	0	0	0	0	0	0	0	0	0
VFG042265(gi:46398256)_(ascN)_AscN_[T3SS_(SS032)]_[Aeromonas_hydrophila_str._AH3]	Aeromonas_hydrophila_str._AH3]	ascN	7	0	2	0	0	0	3	0	0	0	0	0	0	0	0	0	0	0	0	0	0	0	0	0	0	0	0	1	0	0	0	0	0	0	0	0	0	0	0	0	0	0	0	0	0	0	0
VFG042271(gi:46398262)_(ascV)_AscV_[T3SS_(SS032)]_[Aeromonas_hydrophila_str._AH3]	Aeromonas_hydrophila_str._AH3]	ascV	1	0	2	0	0	0	0	0	0	0	0	0	0	0	0	0	0	0	0	0	0	0	0	0	0	0	0	0	0	0	0	0	0	0	0	0	0	0	0	0	0	0	0	0	0	0	0
VFG042274(gi:46398265)_(acrV)_AcrV_[T3SS_(SS032)]_[Aeromonas_hydrophila_str._AH3]	Aeromonas_hydrophila_str._AH3]	acrV	1	0	2	0	0	0	0	0	0	0	0	0	0	0	0	0	0	0	0	0	0	0	0	0	0	0	0	0	0	0	0	0	0	0	0	0	0	0	0	0	0	0	0	0	0	0	0
VFG042261(gi:46398252)_(ascR)_AcrR_[T3SS_(SS032)]_[Aeromonas_hydrophila_str._AH3]	Aeromonas_hydrophila_str._AH3]	ascR	1	0	2	0	0	0	0	0	0	0	0	0	0	0	0	0	0	0	0	0	0	0	0	0	0	0	0	0	0	0	0	0	0	0	0	0	0	0	0	0	0	0	0	0	0	0	0
VFG042280(gi:46398271)_(exsA)_ExsA_[T3SS_(SS032)]_[Aeromonas_hydrophila_str._AH3]	Aeromonas_hydrophila_str._AH3]	exsA	0	0	2	0	0	0	0	0	0	0	0	0	0	0	0	0	0	0	0	0	0	0	0	0	0	0	0	0	0	0	0	0	0	0	0	0	0	0	0	0	0	0	0	0	0	0	0
VFG042286(gi:46398277)_(ascF)_AscF_[T3SS_(SS032)]_[Aeromonas_hydrophila_str._AH3]	Aeromonas_hydrophila_str._AH3]	ascF	0	0	2	0	0	0	0	0	0	0	0	0	0	0	0	0	0	0	0	0	0	0	0	0	0	0	0	0	0	0	0	0	0	0	0	0	0	0	0	0	0	0	0	0	0	0	0
VFG042285(gi:46398276)_(ascE)_AscE_[T3SS_(SS032)]_[Aeromonas_hydrophila_str._AH3]	Aeromonas_hydrophila_str._AH3]	ascE	0	0	2	0	0	0	0	0	0	0	0	0	0	0	0	0	0	0	0	0	0	0	0	0	0	0	0	0	0	0	0	0	0	0	0	0	0	0	0	0	0	0	0	0	0	0	0
VFG042269(gi:46398260)_(ascX)_AscX_[T3SS_(SS032)]_[Aeromonas_hydrophila_str._AH3]	Aeromonas_hydrophila_str._AH3]	ascX	0	0	2	0	0	0	0	0	0	0	0	0	0	0	0	0	0	0	0	0	0	0	0	0	0	0	0	0	0	0	0	0	0	0	0	0	0	0	0	0	0	0	0	0	0	0	0
VFG042284(gi:46398275)_(ascD)_AscD_[T3SS_(SS032)]_[Aeromonas_hydrophila_str._AH3]	Aeromonas_hydrophila_str._AH3]	ascD	0	0	2	0	0	0	0	0	0	0	0	0	0	0	0	0	0	0	0	0	0	0	0	0	0	0	0	0	0	0	0	0	0	0	0	0	0	0	0	0	0	0	0	0	0	0	0
VFG042264(gi:46398255)_(ascO)_AscO_[T3SS_(SS032)]_[Aeromonas_hydrophila_str._AH3]	Aeromonas_hydrophila_str._AH3]	ascO	0	0	2	0	0	0	0	0	0	0	0	0	0	0	0	0	0	0	0	0	0	0	0	0	0	0	0	0	0	0	0	0	0	0	0	0	0	0	0	0	0	0	0	0	0	0	0
VFG042266(gi:46398257)_(aopN)_AopN_[T3SS_(SS032)]_[Aeromonas_hydrophila_str._AH3]	Aeromonas_hydrophila_str._AH3]	aopN	0	0	2	0	0	0	0	0	0	0	0	0	0	0	0	0	0	0	0	0	0	0	0	0	0	0	0	0	0	0	0	0	0	0	0	0	0	0	0	0	0	0	0	0	0	0	0
VFG042283(gi:46398274)_(ascC)_AscC_[T3SS_(SS032)]_[Aeromonas_hydrophila_str._AH3]	Aeromonas_hydrophila_str._AH3]	ascC	0	0	2	0	0	0	0	0	0	0	0	0	0	0	0	0	0	0	0	0	0	0	0	0	0	0	0	0	0	0	0	0	0	0	0	0	0	0	0	0	0	0	0	0	0	0	0
VFG042279(gi:46398270)_(exsB)_ExsC_[T3SS_(SS032)]_[Aeromonas_hydrophila_str._AH3]	Aeromonas_hydrophila_str._AH3]	exsB	0	0	2	0	0	0	0	0	0	0	0	0	0	0	0	0	0	0	0	0	0	0	0	0	0	0	0	0	0	0	0	0	0	0	0	0	0	0	0	0	0	0	0	0	0	0	0
VFG042263(gi:46398254)_(ascP)_AscP_[T3SS_(SS032)]_[Aeromonas_hydrophila_str._AH3]	Aeromonas_hydrophila_str._AH3]	ascP	0	0	2	0	0	0	0	0	0	0	0	0	0	0	0	0	0	0	0	0	0	0	0	0	0	0	0	0	0	0	0	0	0	0	0	0	0	0	0	0	0	0	0	0	0	0	0
VFG042276(gi:46398267)_(aopB)_AopB_[T3SS_(SS032)]_[Aeromonas_hydrophila_str._AH3]	Aeromonas_hydrophila_str._AH3]	aopB	0	0	2	0	0	0	0	0	0	0	0	0	0	0	0	0	0	0	0	0	0	0	0	0	0	0	0	0	0	0	0	0	0	0	0	0	0	0	0	0	0	0	0	0	0	0	0
VFG042277(gi:46398268)_(aopD)_AopD_[T3SS_(SS032)]_[Aeromonas_hydrophila_str._AH3]	Aeromonas_hydrophila_str._AH3]	aopD	0	0	2	0	0	0	0	0	0	0	0	0	0	0	0	0	0	0	0	0	0	0	0	0	0	0	0	0	0	0	0	0	0	0	0	0	0	0	0	0	0	0	0	0	0	0	0
VFG042267(gi:46398258)_(acr1)_Acr1_[T3SS_(SS032)]_[Aeromonas_hydrophila_str._AH3]	Aeromonas_hydrophila_str._AH3]	acr1	0	0	2	0	0	0	0	0	0	0	0	0	0	0	0	0	0	0	0	0	0	0	0	0	0	0	0	0	0	0	0	0	0	0	0	0	0	0	0	0	0	0	0	0	0	0	0
VFG042262(gi:46398253)_(ascQ)_AscQ_[T3SS_(SS032)]_[Aeromonas_hydrophila_str._AH3]	Aeromonas_hydrophila_str._AH3]	ascQ	0	0	2	0	0	0	0	0	0	0	0	0	0	0	0	0	0	0	0	0	0	0	0	0	0	0	0	0	0	0	0	0	0	0	0	0	0	0	0	0	0	0	0	0	0	0	0
VFG042278(gi:46398269)_(exsC)_ExsC_[T3SS_(SS032)]_[Aeromonas_hydrophila_str._AH3]	Aeromonas_hydrophila_str._AH3]	exsC	0	0	2	0	0	0	0	0	0	0	0	0	0	0	0	0	0	0	0	0	0	0	0	0	0	0	0	0	0	0	0	0	0	0	0	0	0	0	0	0	0	0	0	0	0	0	0
VFG042292(gi:46398283)_(ascL)_AscL_[T3SS_(SS032)]_[Aeromonas_hydrophila_str._AH3]	Aeromonas_hydrophila_str._AH3]	ascL	0	0	2	0	0	0	0	0	0	0	0	0	0	0	0	0	0	0	0	0	0	0	0	0	0	0	0	0	0	0	0	0	0	0	0	0	0	0	0	0	0	0	0	0	0	0	0
VFG042031(gi:46398249)_(ascU)_AscU_[T3SS_(SS032)]_[Aeromonas_hydrophila_str._AH3]	Aeromonas_hydrophila_str._AH3]	ascU	0	0	2	0	0	0	0	0	0	0	0	0	0	0	0	0	0	0	0	0	0	0	0	0	0	0	0	0	0	0	0	0	0	0	0	0	0	0	0	0	0	0	0	0	0	0	0
VFG042268(gi:46398259)_(acr2)_Acr2_[T3SS_(SS032)]_[Aeromonas_hydrophila_str._AH3]	Aeromonas_hydrophila_str._AH3]	acr2	0	0	2	0	0	0	0	0	0	0	0	0	0	0	0	0	0	0	0	0	0	0	0	0	0	0	0	0	0	0	0	0	0	0	0	0	0	0	0	0	0	0	0	0	0	0	0
VFG042275(gi:46398266)_(acrH)_AcrH_[T3SS_(SS032)]_[Aeromonas_hydrophila_str._AH3]	Aeromonas_hydrophila_str._AH3]	acrH	0	0	2	0	0	0	0	0	0	0	0	0	0	0	0	0	0	0	0	0	0	0	0	0	0	0	0	0	0	0	0	0	0	0	0	0	0	0	0	0	0	0	0	0	0	0	0
VFG042291(gi:46398282)_(ascK)_AscK_[T3SS_(SS032)]_[Aeromonas_hydrophila_str._AH3]	Aeromonas_hydrophila_str._AH3]	ascK	0	0	2	0	0	0	0	0	0	0	0	0	0	0	0	0	0	0	0	0	0	0	0	0	0	0	0	0	0	0	0	0	0	0	0	0	0	0	0	0	0	0	0	0	0	0	0
VFG042290(gi:46398281)_(ascJ)_AscJ_[T3SS_(SS032)]_[Aeromonas_hydrophila_str._AH3]	Aeromonas_hydrophila_str._AH3]	ascJ	0	0	2	0	0	0	0	0	0	0	0	0	0	0	0	0	0	0	0	0	0	0	0	0	0	0	0	0	0	0	0	0	0	0	0	0	0	0	0	0	0	0	0	0	0	0	0
VFG042259(gi:46398250)_(ascT)_AscT_[T3SS_(SS032)]_[Aeromonas_hydrophila_str._AH3]	Aeromonas_hydrophila_str._AH3]	ascT	0	0	2	0	0	0	0	0	0	0	0	0	0	0	0	0	0	0	0	0	0	0	0	0	0	0	0	0	0	0	0	0	0	0	0	0	0	0	0	0	0	0	0	0	0	0	0
VFG042281(gi:46398272)_(exsD)_ExsD_[T3SS_(SS032)]_[Aeromonas_hydrophila_str._AH3]	Aeromonas_hydrophila_str._AH3]	exsD	0	0	2	0	0	0	0	0	0	0	0	0	0	0	0	0	0	0	0	0	0	0	0	0	0	0	0	0	0	0	0	0	0	0	0	0	0	0	0	0	0	0	0	0	0	0	0
VFG042270(gi:46398261)_(ascY)_AscY_[T3SS_(SS032)]_[Aeromonas_hydrophila_str._AH3]	Aeromonas_hydrophila_str._AH3]	ascY	0	0	2	0	0	0	0	0	0	0	0	0	0	0	0	0	0	0	0	0	0	0	0	0	0	0	0	0	0	0	0	0	0	0	0	0	0	0	0	0	0	0	0	0	0	0	0
VFG042287(gi:46398278)_(ascG)_AscG_[T3SS_(SS032)]_[Aeromonas_hydrophila_str._AH3]	Aeromonas_hydrophila_str._AH3]	ascG	0	0	2	0	0	0	0	0	0	0	0	0	0	0	0	0	0	0	0	0	0	0	0	0	0	0	0	0	0	0	0	0	0	0	0	0	0	0	0	0	0	0	0	0	0	0	0
VFG042289(gi:46398280)_(ascI)_AscI_[T3SS_(SS032)]_[Aeromonas_hydrophila_str._AH3]	Aeromonas_hydrophila_str._AH3]	ascI	0	0	2	0	0	0	0	0	0	0	0	0	0	0	0	0	0	0	0	0	0	0	0	0	0	0	0	0	0	0	0	0	0	0	0	0	0	0	0	0	0	0	0	0	0	0	0
VFG042282(gi:46398273)_(ascB)_AscB_[T3SS_(SS032)]_[Aeromonas_hydrophila_str._AH3]	Aeromonas_hydrophila_str._AH3]	ascB	0	0	2	0	0	0	0	0	0	0	0	0	0	0	0	0	0	0	0	0	0	0	0	0	0	0	0	0	0	0	0	0	0	0	0	0	0	0	0	0	0	0	0	0	0	0	0
VFG042272(gi:46398263)_(acrR)_AcrR_[T3SS_(SS032)]_[Aeromonas_hydrophila_str._AH3]	Aeromonas_hydrophila_str._AH3]	acrR	0	0	2	0	0	0	0	0	0	0	0	0	0	0	0	0	0	0	0	0	0	0	0	0	0	0	0	0	0	0	0	0	0	0	0	0	0	0	0	0	0	0	0	0	0	0	0
VFG042273(gi:46398264)_(acrG)_AcrG_[T3SS_(SS032)]_[Aeromonas_hydrophila_str._AH3]	Aeromonas_hydrophila_str._AH3]	acrG	0	0	2	0	0	0	0	0	0	0	0	0	0	0	0	0	0	0	0	0	0	0	0	0	0	0	0	0	0	0	0	0	0	0	0	0	0	0	0	0	0	0	0	0	0	0	0
VFG042288(gi:46398279)_(ascH)_AscH_[T3SS_(SS032)]_[Aeromonas_hydrophila_str._AH3]	Aeromonas_hydrophila_str._AH3]	ascH	0	0	2	0	0	0	0	0	0	0	0	0	0	0	0	0	0	0	0	0	0	0	0	0	0	0	0	0	0	0	0	0	0	0	0	0	0	0	0	0	0	0	0	0	0	0	0
VFG042260(gi:46398251)_(ascS)_AscS_[T3SS_(SS032)]_[Aeromonas_hydrophila_str._AH3]	Aeromonas_hydrophila_str._AH3]	ascS	0	0	2	0	0	0	0	0	0	0	0	0	0	0	0	0	0	0	0	0	0	0	0	0	0	0	0	0	0	0	0	0	0	0	0	0	0	0	0	0	0	0	0	0	0	0	0
VFG043202(gi:13446370)_(lafT)_LafT_[ND_(AI143)]_[Aeromonas_hydrophila_str._AH-3]	Aeromonas_hydrophila_str._AH-3]	lafT	2	0	2	0	0	0	0	0	0	0	0	0	0	0	0	0	0	0	0	0	0	0	0	0	0	0	0	0	0	0	0	0	0	0	0	0	0	0	0	0	0	0	0	0	0	0	0
VFG042294(gi:148806652)_(aexT)_AexT_[T3SS_(SS032)]_[Aeromonas_hydrophila_str._AH-3]	Aeromonas_hydrophila_str._AH-3]	aexT	2	0	2	0	0	0	0	0	0	0	0	0	0	0	0	0	0	0	0	0	0	0	0	0	0	0	0	0	0	0	0	0	0	0	0	0	0	0	0	0	0	0	0	0	0	0	0
VFG043187(gi:74101659)_(flgF)_FlgFL_[ND_(AI143)]_[Aeromonas_hydrophila_str._AH-3]	Aeromonas_hydrophila_str._AH-3]	flgF	1	0	2	0	0	0	0	0	0	0	0	0	0	0	0	0	0	0	0	0	0	0	0	0	0	0	0	0	0	0	0	0	0	0	0	0	0	0	0	0	0	0	0	0	0	0	0
VFG043194(gi:74101666)_(maf-5)_Maf-5_[ND_(AI143)]_[Aeromonas_hydrophila_str._AH-3]	Aeromonas_hydrophila_str._AH-3]	maf-5	0	0	2	0	0	0	0	0	0	0	0	0	0	0	0	0	0	0	0	0	0	0	0	0	0	0	0	0	0	0	0	0	0	0	0	0	0	0	0	0	0	0	0	0	0	0	0
VFG043176(gi:74101648)_(fliG)_FliGL_[ND_(AI143)]_[Aeromonas_hydrophila_str._AH-3]	Aeromonas_hydrophila_str._AH-3]	fliG	0	0	2	0	0	0	0	0	0	0	0	0	0	0	0	0	0	0	0	0	0	0	0	0	0	0	0	0	0	0	0	0	0	0	0	0	0	0	0	0	0	0	0	0	0	0	0
VFG043190(gi:74101662)_(flgI)_FlgIL_[ND_(AI143)]_[Aeromonas_hydrophila_str._AH-3]	Aeromonas_hydrophila_str._AH-3]	flgI	0	0	2	0	0	0	0	0	0	0	0	0	0	0	0	0	0	0	0	0	0	0	0	0	0	0	0	0	0	0	0	0	0	0	0	0	0	0	0	0	0	0	0	0	0	0	0
VFG043200(gi:13446368)_(lafF)_LafF_[ND_(AI143)]_[Aeromonas_hydrophila_str._AH-3]	Aeromonas_hydrophila_str._AH-3]	lafF	0	0	2	0	0	0	0	0	0	0	0	0	0	0	0	0	0	0	0	0	0	0	0	0	0	0	0	0	0	0	0	0	0	0	0	0	0	0	0	0	0	0	0	0	0	0	0
VFG043172(gi:74101644)_(flhA)_FlhAL_[ND_(AI143)]_[Aeromonas_hydrophila_str._AH-3]	Aeromonas_hydrophila_str._AH-3]	flhA	0	0	2	0	0	0	0	0	0	0	0	0	0	0	0	0	0	0	0	0	0	0	0	0	0	0	0	0	0	0	0	0	0	0	0	0	0	0	0	0	0	0	0	0	0	0	0
VFG043188(gi:74101660)_(flgG)_FlgGL_[ND_(AI143)]_[Aeromonas_hydrophila_str._AH-3]	Aeromonas_hydrophila_str._AH-3]	flgG	0	0	2	0	0	0	0	0	0	0	0	0	0	0	0	0	0	0	0	0	0	0	0	0	0	0	0	0	0	0	0	0	0	0	0	0	0	0	0	0	0	0	0	0	0	0	0
VFG043175(gi:74101647)_(fliF)_FliFL_[ND_(AI143)]_[Aeromonas_hydrophila_str._AH-3]	Aeromonas_hydrophila_str._AH-3]	fliF	0	0	2	0	0	0	0	0	0	0	0	0	0	0	0	0	0	0	0	0	0	0	0	0	0	0	0	0	0	0	0	0	0	0	0	0	0	0	0	0	0	0	0	0	0	0	0
VFG043196(gi:13446364)_(lafB)_flagellar_hook_associated_protein_2_[ND_(AI143)]_[Aeromonas_hydrophila_str._AH-3]	Aeromonas_hydrophila_str._AH-3]	lafB	0	0	2	0	0	0	0	0	0	0	0	0	0	0	0	0	0	0	0	0	0	0	0	0	0	0	0	0	0	0	0	0	0	0	0	0	0	0	0	0	0	0	0	0	0	0	0
VFG043167(gi:74101639)_(fliN)_FliNL_[ND_(AI143)]_[Aeromonas_hydrophila_str._AH-3]	Aeromonas_hydrophila_str._AH-3]	fliN	0	0	2	0	0	0	0	0	0	0	0	0	0	0	0	0	0	0	0	0	0	0	0	0	0	0	0	0	0	0	0	0	0	0	0	0	0	0	0	0	0	0	0	0	0	0	0
VFG043183(gi:74101655)_(flgB)_FlgBL_[ND_(AI143)]_[Aeromonas_hydrophila_str._AH-3]	Aeromonas_hydrophila_str._AH-3]	flgB	0	0	2	0	0	0	0	0	0	0	0	0	0	0	0	0	0	0	0	0	0	0	0	0	0	0	0	0	0	0	0	0	0	0	0	0	0	0	0	0	0	0	0	0	0	0	0
VFG043199(gi:13446367)_(lafE)_flagellar_hook_control_length_protein_[ND_(AI143)]_[Aeromonas_hydrophila_str._AH-3]	Aeromonas_hydrophila_str._AH-3]	lafE	0	0	2	0	0	0	0	0	0	0	0	0	0	0	0	0	0	0	0	0	0	0	0	0	0	0	0	0	0	0	0	0	0	0	0	0	0	0	0	0	0	0	0	0	0	0	0
VFG043171(gi:74101643)_(flhB)_FlhBL_[ND_(AI143)]_[Aeromonas_hydrophila_str._AH-3]	Aeromonas_hydrophila_str._AH-3]	flhB	0	0	2	0	0	0	0	0	0	0	0	0	0	0	0	0	0	0	0	0	0	0	0	0	0	0	0	0	0	0	0	0	0	0	0	0	0	0	0	0	0	0	0	0	0	0	0
VFG043201(gi:13446369)_(lafS)_RNA_polymerase_sigma_factor_[ND_(AI143)]_[Aeromonas_hydrophila_str._AH-3]	Aeromonas_hydrophila_str._AH-3]	lafS	0	0	2	0	0	0	0	0	0	0	0	0	0	0	0	0	0	0	0	0	0	0	0	0	0	0	0	0	0	0	0	0	0	0	0	0	0	0	0	0	0	0	0	0	0	0	0
VFG043173(gi:74101645)_(lafK)_LafK_[ND_(AI143)]_[Aeromonas_hydrophila_str._AH-3]	Aeromonas_hydrophila_str._AH-3]	lafK	0	0	2	0	0	0	0	0	0	0	0	0	0	0	0	0	0	0	0	0	0	0	0	0	0	0	0	0	0	0	0	0	0	0	0	0	0	0	0	0	0	0	0	0	0	0	0
VFG043203(gi:13446371)_(lafU)_LafU_[ND_(AI143)]_[Aeromonas_hydrophila_str._AH-3]	Aeromonas_hydrophila_str._AH-3]	lafU	0	0	2	0	0	0	0	0	0	0	0	0	0	0	0	0	0	0	0	0	0	0	0	0	0	0	0	0	0	0	0	0	0	0	0	0	0	0	0	0	0	0	0	0	0	0	0
VFG043170(gi:74101642)_(fliR)_FliRL_[ND_(AI143)]_[Aeromonas_hydrophila_str._AH-3]	Aeromonas_hydrophila_str._AH-3]	fliR	0	0	2	0	0	0	0	0	0	0	0	0	0	0	0	0	0	0	0	0	0	0	0	0	0	0	0	0	0	0	0	0	0	0	0	0	0	0	0	0	0	0	0	0	0	0	0
VFG043178(gi:74101650)_(fliI)_FliIL_[ND_(AI143)]_[Aeromonas_hydrophila_str._AH-3]	Aeromonas_hydrophila_str._AH-3]	fliI	0	0	2	0	0	0	0	0	0	0	0	0	0	0	0	0	0	0	0	0	0	0	0	0	0	0	0	0	0	0	0	0	0	0	0	0	0	0	0	0	0	0	0	0	0	0	0
VFG043168(gi:74101640)_(fliP)_FliPL_[ND_(AI143)]_[Aeromonas_hydrophila_str._AH-3]	Aeromonas_hydrophila_str._AH-3]	fliP	0	0	2	0	0	0	0	0	0	0	0	0	0	0	0	0	0	0	0	0	0	0	0	0	0	0	0	0	0	0	0	0	0	0	0	0	0	0	0	0	0	0	0	0	0	0	0
VFG043185(gi:74101657)_(flgD)_FlgDL_[ND_(AI143)]_[Aeromonas_hydrophila_str._AH-3]	Aeromonas_hydrophila_str._AH-3]	flgD	0	0	2	0	0	0	0	0	0	0	0	0	0	0	0	0	0	0	0	0	0	0	0	0	0	0	0	0	0	0	0	0	0	0	0	0	0	0	0	0	0	0	0	0	0	0	0
VFG043182(gi:74101654)_(flgA)_FlgAL_[ND_(AI143)]_[Aeromonas_hydrophila_str._AH-3]	Aeromonas_hydrophila_str._AH-3]	flgA	0	0	2	0	0	0	0	0	0	0	0	0	0	0	0	0	0	0	0	0	0	0	0	0	0	0	0	0	0	0	0	0	0	0	0	0	0	0	0	0	0	0	0	0	0	0	0
VFG043191(gi:74101663)_(flgJ)_FlgJL_[ND_(AI143)]_[Aeromonas_hydrophila_str._AH-3]	Aeromonas_hydrophila_str._AH-3]	flgJ	0	0	2	0	0	0	0	0	0	0	0	0	0	0	0	0	0	0	0	0	0	0	0	0	0	0	0	0	0	0	0	0	0	0	0	0	0	0	0	0	0	0	0	0	0	0	0
VFG043186(gi:74101658)_(flgE)_FlgEL_[ND_(AI143)]_[Aeromonas_hydrophila_str._AH-3]	Aeromonas_hydrophila_str._AH-3]	flgE	0	0	2	0	0	0	0	0	0	0	0	0	0	0	0	0	0	0	0	0	0	0	0	0	0	0	0	0	0	0	0	0	0	0	0	0	0	0	0	0	0	0	0	0	0	0	0
VFG043189(gi:74101661)_(flgH)_FlgHL_[ND_(AI143)]_[Aeromonas_hydrophila_str._AH-3]	Aeromonas_hydrophila_str._AH-3]	flgH	0	0	2	0	0	0	0	0	0	0	0	0	0	0	0	0	0	0	0	0	0	0	0	0	0	0	0	0	0	0	0	0	0	0	0	0	0	0	0	0	0	0	0	0	0	0	0
VFG043169(gi:74101641)_(fliQ)_FliQL_[ND_(AI143)]_[Aeromonas_hydrophila_str._AH-3]	Aeromonas_hydrophila_str._AH-3]	fliQ	0	0	2	0	0	0	0	0	0	0	0	0	0	0	0	0	0	0	0	0	0	0	0	0	0	0	0	0	0	0	0	0	0	0	0	0	0	0	0	0	0	0	0	0	0	0	0
VFG043179(gi:74101651)_(fliJ)_FliJL_[ND_(AI143)]_[Aeromonas_hydrophila_str._AH-3]	Aeromonas_hydrophila_str._AH-3]	fliJ	0	0	2	0	0	0	0	0	0	0	0	0	0	0	0	0	0	0	0	0	0	0	0	0	0	0	0	0	0	0	0	0	0	0	0	0	0	0	0	0	0	0	0	0	0	0	0
VFG043180(gi:74101652)_(flgN)_FlgNL_[ND_(AI143)]_[Aeromonas_hydrophila_str._AH-3]	Aeromonas_hydrophila_str._AH-3]	flgN	0	0	2	0	0	0	0	0	0	0	0	0	0	0	0	0	0	0	0	0	0	0	0	0	0	0	0	0	0	0	0	0	0	0	0	0	0	0	0	0	0	0	0	0	0	0	0
VFG043198(gi:13446366)_(lafX)_LafX_[ND_(AI143)]_[Aeromonas_hydrophila_str._AH-3]	Aeromonas_hydrophila_str._AH-3]	lafX	0	0	2	0	0	0	0	0	0	0	0	0	0	0	0	0	0	0	0	0	0	0	0	0	0	0	0	0	0	0	0	0	0	0	0	0	0	0	0	0	0	0	0	0	0	0	0
VFG043166(gi:74101638)_(fliM)_FliML_[ND_(AI143)]_[Aeromonas_hydrophila_str._AH-3]	Aeromonas_hydrophila_str._AH-3]	fliM	0	0	2	0	0	0	0	0	0	0	0	0	0	0	0	0	0	0	0	0	0	0	0	0	0	0	0	0	0	0	0	0	0	0	0	0	0	0	0	0	0	0	0	0	0	0	0
VFG043195(gb|AAK20919)_(lafA)_lateral_flagellin_LafA_[ND_(AI143)]_[Aeromonas_hydrophila_str._AH-3]	Aeromonas_hydrophila_str._AH-3]	lafA	0	0	2	0	0	0	0	0	0	0	0	0	0	0	0	0	0	0	0	0	0	0	0	0	0	0	0	0	0	0	0	0	0	0	0	0	0	0	0	0	0	0	0	0	0	0	0
VFG043181(gi:74101653)_(flgM)_FlgML_[ND_(AI143)]_[Aeromonas_hydrophila_str._AH-3]	Aeromonas_hydrophila_str._AH-3]	flgM	0	0	2	0	0	0	0	0	0	0	0	0	0	0	0	0	0	0	0	0	0	0	0	0	0	0	0	0	0	0	0	0	0	0	0	0	0	0	0	0	0	0	0	0	0	0	0
VFG043177(gi:74101649)_(fliH)_FliHL_[ND_(AI143)]_[Aeromonas_hydrophila_str._AH-3]	Aeromonas_hydrophila_str._AH-3]	fliH	0	0	2	0	0	0	0	0	0	0	0	0	0	0	0	0	0	0	0	0	0	0	0	0	0	0	0	0	0	0	0	0	0	0	0	0	0	0	0	0	0	0	0	0	0	0	0
VFG043192(gi:74101664)_(flgK)_FlgKL_[ND_(AI143)]_[Aeromonas_hydrophila_str._AH-3]	Aeromonas_hydrophila_str._AH-3]	flgK	0	0	2	0	0	0	0	0	0	0	0	0	0	0	0	0	0	0	0	0	0	0	0	0	0	0	0	0	0	0	0	0	0	0	0	0	0	0	0	0	0	0	0	0	0	0	0
VFG043197(gi:13446365)_(lafC)_LafC_[ND_(AI143)]_[Aeromonas_hydrophila_str._AH-3]	Aeromonas_hydrophila_str._AH-3]	lafC	0	0	2	0	0	0	0	0	0	0	0	0	0	0	0	0	0	0	0	0	0	0	0	0	0	0	0	0	0	0	0	0	0	0	0	0	0	0	0	0	0	0	0	0	0	0	0
VFG043184(gi:74101656)_(flgC)_FlgCL_[ND_(AI143)]_[Aeromonas_hydrophila_str._AH-3]	Aeromonas_hydrophila_str._AH-3]	flgC	0	0	2	0	0	0	0	0	0	0	0	0	0	0	0	0	0	0	0	0	0	0	0	0	0	0	0	0	0	0	0	0	0	0	0	0	0	0	0	0	0	0	0	0	0	0	0
VFG043174(gi:74101646)_(fliE)_FliEL_[ND_(AI143)]_[Aeromonas_hydrophila_str._AH-3]	Aeromonas_hydrophila_str._AH-3]	fliE	0	0	2	0	0	0	0	0	0	0	0	0	0	0	0	0	0	0	0	0	0	0	0	0	0	0	0	0	0	0	0	0	0	0	0	0	0	0	0	0	0	0	0	0	0	0	0
VFG042293(gi:111143381)_(aexU)_AexT-like_protein_[T3SS_(SS032)]_[Aeromonas_hydrophila_str._SSU]	Aeromonas_hydrophila_str._SSU]	aexU	0	0	2	0	0	0	0	0	0	0	0	0	0	0	0	0	0	0	0	0	0	0	0	0	0	0	0	0	0	0	0	0	0	0	0	0	0	0	0	0	0	0	0	0	0	0	0
VFG038276(gb|YP_855103)_(exeE)_general_secretory_pathway_protein_E_[exe_(SS209)]_[Aeromonas_hydrophila_subsp._hydrophila_ATCC_7966]	Aeromonas_hydrophila_subsp._hydrophila_ATCC_7966]	exeE	8	0	2	0	0	0	0	0	0	0	0	0	0	0	0	0	0	0	0	0	0	0	0	0	0	0	0	0	0	0	0	0	0	0	0	0	0	0	0	0	0	0	0	0	0	0	0
VFG038395(gb|YP_856375)_(clpB)_type_VI_secretion_system_ATPase_ClpV1_[T6SS_(SS194)]_[Aeromonas_hydrophila_subsp._hydrophila_ATCC_7966]	Aeromonas_hydrophila_subsp._hydrophila_ATCC_7966]	clpB	7	0	2	0	0	0	1	0	1	0	0	0	0	0	0	0	0	0	0	0	0	0	0	0	0	0	0	0	0	0	0	0	0	0	0	0	0	0	0	0	0	0	0	0	0	0	0
VFG038847(gb|YP_858602)_(flmD)_FlmD_protein_[Polar_flagella_(CVF786)]_[Aeromonas_hydrophila_subsp._hydrophila_ATCC_7966]	Aeromonas_hydrophila_subsp._hydrophila_ATCC_7966]	flmD	4	0	2	0	0	0	0	0	0	0	0	0	0	0	0	0	0	0	0	0	0	0	0	0	0	0	0	0	0	0	0	0	0	0	0	0	0	0	0	0	0	0	0	0	0	0	0
VFG038916(gb|YP_855895)_(rtxB)_RTX_toxin_transporter,_ATPase_protein_[The_repeat_in_toxin_(RTX)_(CVF795)]_[Aeromonas_hydrophila_subsp._hydrophila_ATCC_7966]	Aeromonas_hydrophila_subsp._hydrophila_ATCC_7966]	rtxB	4	0	2	0	0	0	0	0	0	0	0	0	0	0	0	0	0	0	0	0	0	0	0	0	0	0	0	0	0	0	0	0	0	0	0	0	0	0	0	0	0	0	0	0	0	0	0
VFG038471(gb|YP_857247)_(tapW)_twitching_ATPase_[Tap_type_IV_pili_(CVF783)]_[Aeromonas_hydrophila_subsp._hydrophila_ATCC_7966]	Aeromonas_hydrophila_subsp._hydrophila_ATCC_7966]	tapW	2	0	2	0	0	0	0	0	0	0	0	0	0	0	0	0	0	0	0	0	0	0	0	0	0	0	0	0	0	0	0	0	0	0	0	0	0	0	0	0	0	0	0	0	0	0	0
VFG038682(gb|YP_855918)_(flhA)_flagellar_biosynthesis_protein_FlhA_[ND_(AI144)]_[Aeromonas_hydrophila_subsp._hydrophila_ATCC_7966]	Aeromonas_hydrophila_subsp._hydrophila_ATCC_7966]	flhA	2	0	2	0	0	0	0	0	0	0	0	0	0	0	0	0	0	0	0	0	0	0	0	0	0	0	0	0	0	0	0	0	0	0	0	0	0	0	0	0	0	0	0	0	0	0	0
VFG038371(gb|YP_856361)_(vgrG)_VgrG_protein_[T6SS_(SS194)]_[Aeromonas_hydrophila_subsp._hydrophila_ATCC_7966]	Aeromonas_hydrophila_subsp._hydrophila_ATCC_7966]	vgrG	2	0	2	0	0	0	0	0	0	0	0	0	0	0	0	0	0	0	0	0	0	0	0	0	0	0	0	0	0	0	0	0	0	0	0	0	0	0	0	0	0	0	0	0	0	0	0
VFG038387(gb|YP_856371)_(AHA_1837)_Type_VI_secretion_system_protein_[T6SS_(SS194)]_[Aeromonas_hydrophila_subsp._hydrophila_ATCC_7966]	Aeromonas_hydrophila_subsp._hydrophila_ATCC_7966]	AHA_1837	2	0	2	0	0	0	0	0	0	0	0	0	0	0	0	0	0	0	0	0	0	0	0	0	0	0	0	0	0	0	0	0	0	0	0	0	0	0	0	0	0	0	0	0	0	0	0
VFG038504(gb|YP_856293)_(tapF)_type_IV_pilus_biogenesis/stability_protein,_pilW-like_[Tap_type_IV_pili_(CVF783)]_[Aeromonas_hydrophila_subsp._hydrophila_ATCC_7966]	Aeromonas_hydrophila_subsp._hydrophila_ATCC_7966]	tapF	2	0	2	0	0	0	0	0	0	0	0	0	0	0	0	0	0	0	0	0	0	0	0	0	0	0	0	0	0	0	0	0	0	0	0	0	0	0	0	0	0	0	0	0	0	0	0
VFG038401(gb|YP_856378)_(AHA_1844)_Type_VI_secretion_system_protein_[T6SS_(SS194)]_[Aeromonas_hydrophila_subsp._hydrophila_ATCC_7966]	Aeromonas_hydrophila_subsp._hydrophila_ATCC_7966]	AHA_1844	2	0	2	0	0	0	0	0	0	0	0	0	0	0	0	0	0	0	0	0	0	0	0	0	0	0	0	0	0	0	0	0	0	0	0	0	0	0	0	0	0	0	0	0	0	0	0
VFG038463(gb|YP_858121)_(tapT)_twitching_ATPase_[Tap_type_IV_pili_(CVF783)]_[Aeromonas_hydrophila_subsp._hydrophila_ATCC_7966]	Aeromonas_hydrophila_subsp._hydrophila_ATCC_7966]	tapT	2	0	2	0	0	0	0	0	0	0	0	0	0	0	0	0	0	0	0	0	0	0	0	0	0	0	0	0	0	0	0	0	0	0	0	0	0	0	0	0	0	0	0	0	0	0	0
VFG038459(gb|YP_857681)_(tapQ)_type_IV_pilus_secretin_PilQ_[Tap_type_IV_pili_(CVF783)]_[Aeromonas_hydrophila_subsp._hydrophila_ATCC_7966]	Aeromonas_hydrophila_subsp._hydrophila_ATCC_7966]	tapQ	1	0	2	0	0	0	0	0	0	0	0	0	0	0	0	0	0	0	0	0	0	0	0	0	0	0	0	0	0	0	0	0	0	0	0	0	0	0	0	0	0	0	0	0	0	0	0
VFG038402(gb|YP_856379)_(vasK/icmF)_Type_VI_secretion_system_protein_[T6SS_(SS194)]_[Aeromonas_hydrophila_subsp._hydrophila_ATCC_7966]	Aeromonas_hydrophila_subsp._hydrophila_ATCC_7966]	vasK/icmF	1	0	2	0	0	0	0	0	0	0	0	0	0	0	0	0	0	0	0	0	0	0	0	0	0	0	0	0	0	0	0	0	0	0	0	0	0	0	0	0	0	0	0	0	0	0	0
VFG038367(gb|YP_855660)_(vgrG1)_Type_VI_secretion_system_effector_VgrG1,_ADP-ribosyltransferase__[VgrG1_(TX001)]_[Aeromonas_hydrophila_subsp._hydrophila_ATCC_7966]	Aeromonas_hydrophila_subsp._hydrophila_ATCC_7966]	vgrG1	1	0	2	0	0	0	0	0	0	0	0	0	0	0	0	0	0	0	0	0	0	0	0	0	0	0	0	0	0	0	0	0	0	0	0	0	0	0	0	0	0	0	0	0	0	0	0
VFG038431(gb|YP_858308)_(tapB)_type_IV_pilus_assembly_ATPase,_PilB-like_[Tap_type_IV_pili_(CVF783)]_[Aeromonas_hydrophila_subsp._hydrophila_ATCC_7966]	Aeromonas_hydrophila_subsp._hydrophila_ATCC_7966]	tapB	1	0	2	0	0	0	0	0	0	0	0	0	0	0	0	0	0	0	0	0	0	0	0	0	0	0	0	0	0	0	0	0	0	0	0	0	0	0	0	0	0	0	0	0	0	0	0
VFG038407(gb|YP_856382)_(vgrG)_VgrG_protein_[T6SS_(SS194)]_[Aeromonas_hydrophila_subsp._hydrophila_ATCC_7966]	Aeromonas_hydrophila_subsp._hydrophila_ATCC_7966]	vgrG	1	0	2	0	0	0	0	0	0	0	0	0	0	0	0	0	0	0	0	0	0	0	0	0	0	0	0	0	0	0	0	0	0	0	0	0	0	0	0	0	0	0	0	0	0	0	0
VFG038380(gb|YP_856367)_(AHA_1833)_Type_VI_secretion_system_contractile_sheath_large_subunit_TssC/VipB_[T6SS_(SS194)]_[Aeromonas_hydrophila_subsp._hydrophila_ATCC_7966]	Aeromonas_hydrophila_subsp._hydrophila_ATCC_7966]	AHA_1833	1	0	2	0	0	0	0	0	0	0	0	0	0	0	0	0	0	0	0	0	0	0	0	0	0	0	0	0	0	0	0	0	0	0	0	0	0	0	0	0	0	0	0	0	0	0	0
VFG038403(gb|YP_856380)_(AHA_1846)_Type_VI_secretion_system_protein_[T6SS_(SS194)]_[Aeromonas_hydrophila_subsp._hydrophila_ATCC_7966]	Aeromonas_hydrophila_subsp._hydrophila_ATCC_7966]	AHA_1846	1	0	2	0	0	0	0	0	0	0	0	0	0	0	0	0	0	0	0	0	0	0	0	0	0	0	0	0	0	0	0	0	0	0	0	0	0	0	0	0	0	0	0	0	0	0	0
VFG038383(gb|YP_856369)_(AHA_1835)_Type_VI_secretion_system_protein_[T6SS_(SS194)]_[Aeromonas_hydrophila_subsp._hydrophila_ATCC_7966]	Aeromonas_hydrophila_subsp._hydrophila_ATCC_7966]	AHA_1835	1	0	2	0	0	0	0	0	0	0	0	0	0	0	0	0	0	0	0	0	0	0	0	0	0	0	0	0	0	0	0	0	0	0	0	0	0	0	0	0	0	0	0	0	0	0	0
VFG038435(gb|YP_858309)_(tapC)_type_IV_fimbrial_assembly_protein,_PilC-like_[Tap_type_IV_pili_(CVF783)]_[Aeromonas_hydrophila_subsp._hydrophila_ATCC_7966]	Aeromonas_hydrophila_subsp._hydrophila_ATCC_7966]	tapC	1	0	2	0	0	0	0	0	0	0	0	0	0	0	0	0	0	0	0	0	0	0	0	0	0	0	0	0	0	0	0	0	0	0	0	0	0	0	0	0	0	0	0	0	0	0	0
VFG038827(gb|YP_857351)_(flgN)_flagellar_protein_FlgN_[ND_(AI144)]_[Aeromonas_hydrophila_subsp._hydrophila_ATCC_7966]	Aeromonas_hydrophila_subsp._hydrophila_ATCC_7966]	flgN	1	0	2	0	0	0	0	0	0	0	0	0	0	0	0	0	0	0	0	0	0	0	0	0	0	0	0	0	0	0	0	0	0	0	0	0	0	0	0	0	0	0	0	0	0	0	0
VFG038618(gb|YP_855202)_(motX)_sodium-type_flagellar_motor_component_[Polar_flagella_(CVF786)]_[Aeromonas_hydrophila_subsp._hydrophila_ATCC_7966]	Aeromonas_hydrophila_subsp._hydrophila_ATCC_7966]	motX	1	0	2	0	0	0	0	0	0	0	0	0	0	0	0	0	0	0	0	0	0	0	0	0	0	0	0	0	0	0	0	0	0	0	0	0	0	0	0	0	0	0	0	0	0	0	0
VFG038678(gb|YP_855917)_(flhB)_flagellar_biosynthetic_protein_FlhB_[ND_(AI144)]_[Aeromonas_hydrophila_subsp._hydrophila_ATCC_7966]	Aeromonas_hydrophila_subsp._hydrophila_ATCC_7966]	flhB	1	0	2	0	0	0	0	0	0	0	0	0	0	0	0	0	0	0	0	0	0	0	0	0	0	0	0	0	0	0	0	0	0	0	0	0	0	0	0	0	0	0	0	0	0	0	0
VFG038662(gb|YP_855913)_(fliO)_flagellar_biosynthesis_protein,_FliO_[ND_(AI144)]_[Aeromonas_hydrophila_subsp._hydrophila_ATCC_7966]	Aeromonas_hydrophila_subsp._hydrophila_ATCC_7966]	fliO	1	0	2	0	0	0	0	0	0	0	0	0	0	0	0	0	0	0	0	0	0	0	0	0	0	0	0	0	0	0	0	0	0	0	0	0	0	0	0	0	0	0	0	0	0	0	0
VFG038614(gb|YP_854914)_(mshI)_MSHA_(mannose-sensitive_hemagglutinin)_pili_biogenesis_protein_MshI,_bitopic_inner_membrane_protein_[Mannose-sensitive_hemagglutinin_(Msh)_pilus,_type_IV_pili_(CVF785)]_[Aeromonas_hydrophila_subsp._hydrophila_ATCC_7966]	Aeromonas_hydrophila_subsp._hydrophila_ATCC_7966]	mshI	1	0	2	0	0	0	0	0	0	0	0	0	0	0	0	0	0	0	0	0	0	0	0	0	0	0	0	0	0	0	0	0	0	0	0	0	0	0	0	0	0	0	0	0	0	0	0
VFG038389(gb|YP_856372)_(AHA_1838)_Type_VI_secretion_system_protein_[T6SS_(SS194)]_[Aeromonas_hydrophila_subsp._hydrophila_ATCC_7966]	Aeromonas_hydrophila_subsp._hydrophila_ATCC_7966]	AHA_1838	1	0	2	0	0	0	0	0	0	0	0	0	0	0	0	0	0	0	0	0	0	0	0	0	0	0	0	0	0	0	0	0	0	0	0	0	0	0	0	0	0	0	0	0	0	0	0
VFG038439(gb|YP_858310)_(tapD)_prepilin_peptidase,_pilD-like_[Tap_type_IV_pili_(CVF783)]_[Aeromonas_hydrophila_subsp._hydrophila_ATCC_7966]	Aeromonas_hydrophila_subsp._hydrophila_ATCC_7966]	tapD	1	0	2	0	0	0	0	0	0	0	0	0	0	0	0	0	0	0	0	0	0	0	0	0	0	0	0	0	0	0	0	0	0	0	0	0	0	0	0	0	0	0	0	0	0	0	0
VFG038284(gb|YP_855105)_(exeG)_general_secretion_pathway_protein_G_[exe_(SS209)]_[Aeromonas_hydrophila_subsp._hydrophila_ATCC_7966]	Aeromonas_hydrophila_subsp._hydrophila_ATCC_7966]	exeG	1	0	2	0	0	0	0	0	0	0	0	0	0	0	0	0	0	0	0	0	0	0	0	0	0	0	0	0	0	0	0	0	0	0	0	0	0	0	0	0	0	0	0	0	0	0	0
VFG043204(gb|YP_855930)_(cheW-2)_chemotaxis_protein_CheW_[ND_(AI144)]_[Aeromonas_hydrophila_subsp._hydrophila_ATCC_7966]	Aeromonas_hydrophila_subsp._hydrophila_ATCC_7966]	cheW-2	1	0	2	0	0	0	0	0	0	0	0	0	0	0	0	0	0	0	0	0	0	0	0	0	0	0	0	0	0	0	0	0	0	0	0	0	0	0	0	0	0	0	0	0	0	0	0
VFG038835(gb|YP_857807)_(pomA2)_chemotaxis_protein_PomA_[Polar_flagella_(CVF786)]_[Aeromonas_hydrophila_subsp._hydrophila_ATCC_7966]	Aeromonas_hydrophila_subsp._hydrophila_ATCC_7966]	pomA2	0	0	2	0	0	0	0	0	0	0	0	0	0	0	0	0	0	0	0	0	0	0	0	0	0	0	0	0	0	0	0	0	0	0	0	0	0	0	0	0	0	0	0	0	0	0	0
VFG038487(gb|YP_855232)_(tapY1)_type_IV_pilus_biogenesis_protein_[Tap_type_IV_pili_(CVF783)]_[Aeromonas_hydrophila_subsp._hydrophila_ATCC_7966]	Aeromonas_hydrophila_subsp._hydrophila_ATCC_7966]	tapY1	0	0	2	0	0	0	0	0	0	0	0	0	0	0	0	0	0	0	0	0	0	0	0	0	0	0	0	0	0	0	0	0	0	0	0	0	0	0	0	0	0	0	0	0	0	0	0
VFG038599(gb|YP_854918)_(mshL)_MSHA_(mannose-sensitive_hemagglutinin)_pili_biogenesis_protein_MshL,_outer_membrane_secretin,_GspD-like_[Mannose-sensitive_hemagglutinin_(Msh)_pilus,_type_IV_pili_(CVF785)]_[Aeromonas_hydrophila_subsp._hydrophila_ATCC_7966]	Aeromonas_hydrophila_subsp._hydrophila_ATCC_7966]	mshL	0	0	2	0	0	0	0	0	0	0	0	0	0	0	0	0	0	0	0	0	0	0	0	0	0	0	0	0	0	0	0	0	0	0	0	0	0	0	0	0	0	0	0	0	0	0	0
VFG038455(gb|YP_857682)_(tapP)_type_IV_pilus_biogenesis_protein_PilP_[Tap_type_IV_pili_(CVF783)]_[Aeromonas_hydrophila_subsp._hydrophila_ATCC_7966]	Aeromonas_hydrophila_subsp._hydrophila_ATCC_7966]	tapP	0	0	2	0	0	0	0	0	0	0	0	0	0	0	0	0	0	0	0	0	0	0	0	0	0	0	0	0	0	0	0	0	0	0	0	0	0	0	0	0	0	0	0	0	0	0	0
VFG038575(gb|YP_854925)_(mshC)_MSHA_(mannose-sensitive_hemagglutinin)_pili_minor_prepilin_protein_MshC_[Mannose-sensitive_hemagglutinin_(Msh)_pilus,_type_IV_pili_(CVF785)]_[Aeromonas_hydrophila_subsp._hydrophila_ATCC_7966]	Aeromonas_hydrophila_subsp._hydrophila_ATCC_7966]	mshC	0	0	2	0	0	0	0	0	0	0	0	0	0	0	0	0	0	0	0	0	0	0	0	0	0	0	0	0	0	0	0	0	0	0	0	0	0	0	0	0	0	0	0	0	0	0	0
VFG038767(gb|YP_857336)_(flgL)_flagellar_hook-associated_protein_FlgL_[ND_(AI144)]_[Aeromonas_hydrophila_subsp._hydrophila_ATCC_7966]	Aeromonas_hydrophila_subsp._hydrophila_ATCC_7966]	flgL	0	0	2	0	0	0	0	0	0	0	0	0	0	0	0	0	0	0	0	0	0	0	0	0	0	0	0	0	0	0	0	0	0	0	0	0	0	0	0	0	0	0	0	0	0	0	0
VFG038428(gb|YP_858307)_(tapA)_type_IV_pilus_pilin_subunit,_pilA-like_[Tap_type_IV_pili_(CVF783)]_[Aeromonas_hydrophila_subsp._hydrophila_ATCC_7966]	Aeromonas_hydrophila_subsp._hydrophila_ATCC_7966]	tapA	0	0	2	0	0	0	0	0	0	0	0	0	0	0	0	0	0	0	0	0	0	0	0	0	0	0	0	0	0	0	0	0	0	0	0	0	0	0	0	0	0	0	0	0	0	0	0
VFG038630(gb|YP_855905)_(fliG)_flagellar_motor_switch_protein_G_[ND_(AI144)]_[Aeromonas_hydrophila_subsp._hydrophila_ATCC_7966]	Aeromonas_hydrophila_subsp._hydrophila_ATCC_7966]	fliG	0	0	2	0	0	0	0	0	0	0	0	0	0	0	0	0	0	0	0	0	0	0	0	0	0	0	0	0	0	0	0	0	0	0	0	0	0	0	0	0	0	0	0	0	0	0	0
VFG038775(gb|YP_857338)_(flgJ)_flagellar_rod_assembly_protein/muramidase_FlgJ_[ND_(AI144)]_[Aeromonas_hydrophila_subsp._hydrophila_ATCC_7966]	Aeromonas_hydrophila_subsp._hydrophila_ATCC_7966]	flgJ	0	0	2	0	0	0	0	0	0	0	0	0	0	0	0	0	0	0	0	0	0	0	0	0	0	0	0	0	0	0	0	0	0	0	0	0	0	0	0	0	0	0	0	0	0	0	0
VFG038900(gb|YP_857314)_(hlyA)_Hemolysin_A_[Hemolysin,_HlyA_(CVF792)]_[Aeromonas_hydrophila_subsp._hydrophila_ATCC_7966]	Aeromonas_hydrophila_subsp._hydrophila_ATCC_7966]	hlyA	0	0	2	0	0	0	0	0	0	0	0	0	0	0	0	0	0	0	0	0	0	0	0	0	0	0	0	0	0	0	0	0	0	0	0	0	0	0	0	0	0	0	0	0	0	0	0
VFG038831(gb|YP_857806)_(pomB2)_flagellar_motor_protein_MotB_[Polar_flagella_(CVF786)]_[Aeromonas_hydrophila_subsp._hydrophila_ATCC_7966]	Aeromonas_hydrophila_subsp._hydrophila_ATCC_7966]	pomB2	0	0	2	0	0	0	0	0	0	0	0	0	0	0	0	0	0	0	0	0	0	0	0	0	0	0	0	0	0	0	0	0	0	0	0	0	0	0	0	0	0	0	0	0	0	0	0
VFG038853(gb|YP_858604)_(maf-2)_Maf-2_[Polar_flagella_(CVF786)]_[Aeromonas_hydrophila_subsp._hydrophila_ATCC_7966]	Aeromonas_hydrophila_subsp._hydrophila_ATCC_7966]	maf-2	0	0	2	0	0	0	0	0	0	0	0	0	0	0	0	0	0	0	0	0	0	0	0	0	0	0	0	0	0	0	0	0	0	0	0	0	0	0	0	0	0	0	0	0	0	0	0
VFG038912(gb|YP_855898)_(rtxA)_multifunctional_autoprocessing_repeats-in-toxins_(MARTX)_toxin_[The_repeat_in_toxin_(RTX)_(CVF795)]_[Aeromonas_hydrophila_subsp._hydrophila_ATCC_7966]	Aeromonas_hydrophila_subsp._hydrophila_ATCC_7966]	rtxA	0	0	2	0	0	0	0	0	0	0	0	0	0	0	0	0	0	0	0	0	0	0	0	0	0	0	0	0	0	0	0	0	0	0	0	0	0	0	0	0	0	0	0	0	0	0	0
VFG038589(gb|YP_854921)_(mshE)_ATPase_protein_MshE,_GspE-like_[Mannose-sensitive_hemagglutinin_(Msh)_pilus,_type_IV_pili_(CVF785)]_[Aeromonas_hydrophila_subsp._hydrophila_ATCC_7966]	Aeromonas_hydrophila_subsp._hydrophila_ATCC_7966]	mshE	0	0	2	0	0	0	0	0	0	0	0	0	0	0	0	0	0	0	0	0	0	0	0	0	0	0	0	0	0	0	0	0	0	0	0	0	0	0	0	0	0	0	0	0	0	0	0
VFG038891(gb|YP_854967)_(aerA/act)_Aerolysin_A_[aerolysin_(TX450)]_[Aeromonas_hydrophila_subsp._hydrophila_ATCC_7966]	Aeromonas_hydrophila_subsp._hydrophila_ATCC_7966]	aerA/act	0	0	2	0	0	0	0	0	0	0	0	0	0	0	0	0	0	0	0	0	0	0	0	0	0	0	0	0	0	0	0	0	0	0	0	0	0	0	0	0	0	0	0	0	0	0	0
VFG038634(gb|YP_855906)_(fliH)_flagellar_assembly_protein_FliH_[ND_(AI144)]_[Aeromonas_hydrophila_subsp._hydrophila_ATCC_7966]	Aeromonas_hydrophila_subsp._hydrophila_ATCC_7966]	fliH	0	0	2	0	0	0	0	0	0	0	0	0	0	0	0	0	0	0	0	0	0	0	0	0	0	0	0	0	0	0	0	0	0	0	0	0	0	0	0	0	0	0	0	0	0	0	0
VFG038560(gb|YP_854928)_(mshQ)_MSHA_(mannose-sensitive_hemagglutinin)_pili_biogenesis_protein_MshQ_[Mannose-sensitive_hemagglutinin_(Msh)_pilus,_type_IV_pili_(CVF785)]_[Aeromonas_hydrophila_subsp._hydrophila_ATCC_7966]	Aeromonas_hydrophila_subsp._hydrophila_ATCC_7966]	mshQ	0	0	2	0	0	0	0	0	0	0	0	0	0	0	0	0	0	0	0	0	0	0	0	0	0	0	0	0	0	0	0	0	0	0	0	0	0	0	0	0	0	0	0	0	0	0	0
VFG038742(gb|YP_856237)_(flaH)_flagellar_hook-associated_protein_2_[ND_(AI144)]_[Aeromonas_hydrophila_subsp._hydrophila_ATCC_7966]	Aeromonas_hydrophila_subsp._hydrophila_ATCC_7966]	flaH	0	0	2	0	0	0	0	0	0	0	0	0	0	0	0	0	0	0	0	0	0	0	0	0	0	0	0	0	0	0	0	0	0	0	0	0	0	0	0	0	0	0	0	0	0	0	0
VFG038268(gb|YP_855101)_(exeC)_general_secretion_pathway_protein_C_[exe_(SS209)]_[Aeromonas_hydrophila_subsp._hydrophila_ATCC_7966]	Aeromonas_hydrophila_subsp._hydrophila_ATCC_7966]	exeC	0	0	2	0	0	0	0	0	0	0	0	0	0	0	0	0	0	0	0	0	0	0	0	0	0	0	0	0	0	0	0	0	0	0	0	0	0	0	0	0	0	0	0	0	0	0	0
VFG038443(gb|YP_857685)_(tapM)_type_IV_pilus_assembly_protein_PilM_[Tap_type_IV_pili_(CVF783)]_[Aeromonas_hydrophila_subsp._hydrophila_ATCC_7966]	Aeromonas_hydrophila_subsp._hydrophila_ATCC_7966]	tapM	0	0	2	0	0	0	0	0	0	0	0	0	0	0	0	0	0	0	0	0	0	0	0	0	0	0	0	0	0	0	0	0	0	0	0	0	0	0	0	0	0	0	0	0	0	0	0
VFG038750(gb|YP_856239)_(maf-1)_putative_flagellin_glycosyltransferase_[ND_(AI144)]_[Aeromonas_hydrophila_subsp._hydrophila_ATCC_7966]	Aeromonas_hydrophila_subsp._hydrophila_ATCC_7966]	maf-1	0	0	2	0	0	0	0	0	0	0	0	0	0	0	0	0	0	0	0	0	0	0	0	0	0	0	0	0	0	0	0	0	0	0	0	0	0	0	0	0	0	0	0	0	0	0	0
VFG038779(gb|YP_857339)_(flgI)_flagellar_basal_body_P-ring_protein_[ND_(AI144)]_[Aeromonas_hydrophila_subsp._hydrophila_ATCC_7966]	Aeromonas_hydrophila_subsp._hydrophila_ATCC_7966]	flgI	0	0	2	0	0	0	0	0	0	0	0	0	0	0	0	0	0	0	0	0	0	0	0	0	0	0	0	0	0	0	0	0	0	0	0	0	0	0	0	0	0	0	0	0	0	0	0
VFG038385(gb|YP_856370)_(AHA_1836)_Type_VI_secretion_system_protein_[T6SS_(SS194)]_[Aeromonas_hydrophila_subsp._hydrophila_ATCC_7966]	Aeromonas_hydrophila_subsp._hydrophila_ATCC_7966]	AHA_1836	0	0	2	0	0	0	0	0	0	0	0	0	0	0	0	0	0	0	0	0	0	0	0	0	0	0	0	0	0	0	0	0	0	0	0	0	0	0	0	0	0	0	0	0	0	0	0
VFG038839(gb|YP_858598)_(flmH)_short_chain_dehydrogenase/reductase_family_oxidoreductase_[Polar_flagella_(CVF786)]_[Aeromonas_hydrophila_subsp._hydrophila_ATCC_7966]	Aeromonas_hydrophila_subsp._hydrophila_ATCC_7966]	flmH	0	0	2	0	0	0	0	0	0	0	0	0	0	0	0	0	0	0	0	0	0	0	0	0	0	0	0	0	0	0	0	0	0	0	0	0	0	0	0	0	0	0	0	0	0	0	0
VFG038375(gb|YP_856364)_(AHA_1830)_Type_VI_secretion_system_protein_[T6SS_(SS194)]_[Aeromonas_hydrophila_subsp._hydrophila_ATCC_7966]	Aeromonas_hydrophila_subsp._hydrophila_ATCC_7966]	AHA_1830	0	0	2	0	0	0	0	0	0	0	0	0	0	0	0	0	0	0	0	0	0	0	0	0	0	0	0	0	0	0	0	0	0	0	0	0	0	0	0	0	0	0	0	0	0	0	0
VFG038397(gb|YP_856376)_(vasH/clpV)_sigma-54_dependent_transcriptional_regulator_[T6SS_(SS194)]_[Aeromonas_hydrophila_subsp._hydrophila_ATCC_7966]	Aeromonas_hydrophila_subsp._hydrophila_ATCC_7966]	vasH/clpV	0	0	2	0	0	0	0	0	0	0	0	0	0	0	0	0	0	0	0	0	0	0	0	0	0	0	0	0	0	0	0	0	0	0	0	0	0	0	0	0	0	0	0	0	0	0	0
VFG037929(gb|YP_858233)_(exeA)_general_secretion_pathway_protein_A_[exe_(SS209)]_[Aeromonas_hydrophila_subsp._hydrophila_ATCC_7966]	Aeromonas_hydrophila_subsp._hydrophila_ATCC_7966]	exeA	0	0	2	0	0	0	0	0	0	0	0	0	0	0	0	0	0	0	0	0	0	0	0	0	0	0	0	0	0	0	0	0	0	0	0	0	0	0	0	0	0	0	0	0	0	0	0
VFG038771(gb|YP_857337)_(flgK)_flagellar_hook-associated_protein_FlgK_[ND_(AI144)]_[Aeromonas_hydrophila_subsp._hydrophila_ATCC_7966]	Aeromonas_hydrophila_subsp._hydrophila_ATCC_7966]	flgK	0	0	2	0	0	0	0	0	0	0	0	0	0	0	0	0	0	0	0	0	0	0	0	0	0	0	0	0	0	0	0	0	0	0	0	0	0	0	0	0	0	0	0	0	0	0	0
VFG038811(gb|YP_857347)_(cheR-3)_chemotaxis_protein_CheR_[ND_(AI144)]_[Aeromonas_hydrophila_subsp._hydrophila_ATCC_7966]	Aeromonas_hydrophila_subsp._hydrophila_ATCC_7966]	cheR-3	0	0	2	0	0	0	0	0	0	0	0	0	0	0	0	0	0	0	0	0	0	0	0	0	0	0	0	0	0	0	0	0	0	0	0	0	0	0	0	0	0	0	0	0	0	0	0
VFG038424(gb|YP_855057)_(fimF)_fimbrial_protein_[Type_I_fimbriae_(CVF796)]_[Aeromonas_hydrophila_subsp._hydrophila_ATCC_7966]	Aeromonas_hydrophila_subsp._hydrophila_ATCC_7966]	fimF	0	0	2	0	0	0	0	0	0	0	0	0	0	0	0	0	0	0	0	0	0	0	0	0	0	0	0	0	0	0	0	0	0	0	0	0	0	0	0	0	0	0	0	0	0	0	0
VFG038528(gb|YP_855995)_(flpG)_Flp_pilus_assembly_protein_FlpG_[Flp_type_IV_pili_(CVF784)]_[Aeromonas_hydrophila_subsp._hydrophila_ATCC_7966]	Aeromonas_hydrophila_subsp._hydrophila_ATCC_7966]	flpG	0	0	2	0	0	0	0	0	0	0	0	0	0	0	0	0	0	0	0	0	0	0	0	0	0	0	0	0	0	0	0	0	0	0	0	0	0	0	0	0	0	0	0	0	0	0	0
VFG038722(gb|YP_855928)_(AHA_1389)_CobQ/CobB/MinD/ParA_family_protein_[Polar_flagella_(CVF786)]_[Aeromonas_hydrophila_subsp._hydrophila_ATCC_7966]	Aeromonas_hydrophila_subsp._hydrophila_ATCC_7966]	AHA_1389	0	0	2	0	0	0	0	0	0	0	0	0	0	0	0	0	0	0	0	0	0	0	0	0	0	0	0	0	0	0	0	0	0	0	0	0	0	0	0	0	0	0	0	0	0	0	0
VFG038381(gb|YP_856368)_(AHA_1834)_Type_VI_secretion_system_protein_[T6SS_(SS194)]_[Aeromonas_hydrophila_subsp._hydrophila_ATCC_7966]	Aeromonas_hydrophila_subsp._hydrophila_ATCC_7966]	AHA_1834	0	0	2	0	0	0	0	0	0	0	0	0	0	0	0	0	0	0	0	0	0	0	0	0	0	0	0	0	0	0	0	0	0	0	0	0	0	0	0	0	0	0	0	0	0	0	0
VFG038524(gb|YP_855996)_(flpH)_Flp_pilus_assembly_protein_FlpH_[Flp_type_IV_pili_(CVF784)]_[Aeromonas_hydrophila_subsp._hydrophila_ATCC_7966]	Aeromonas_hydrophila_subsp._hydrophila_ATCC_7966]	flpH	0	0	2	0	0	0	0	0	0	0	0	0	0	0	0	0	0	0	0	0	0	0	0	0	0	0	0	0	0	0	0	0	0	0	0	0	0	0	0	0	0	0	0	0	0	0	0
VFG038759(gb|YP_857329)_(fleS/flrB)_two-component_sensor_kinase_[ND_(AI144)]_[Aeromonas_hydrophila_subsp._hydrophila_ATCC_7966]	Aeromonas_hydrophila_subsp._hydrophila_ATCC_7966]	fleS/flrB	0	0	2	0	0	0	0	0	0	0	0	0	0	0	0	0	0	0	0	0	0	0	0	0	0	0	0	0	0	0	0	0	0	0	0	0	0	0	0	0	0	0	0	0	0	0	0
VFG038918(gb|YP_855893)_(rtxE)_RTX_toxin_transporter,_ATPase_protein_[The_repeat_in_toxin_(RTX)_(CVF795)]_[Aeromonas_hydrophila_subsp._hydrophila_ATCC_7966]	Aeromonas_hydrophila_subsp._hydrophila_ATCC_7966]	rtxE	0	0	2	0	0	0	0	0	0	0	0	0	0	0	0	0	0	0	0	0	0	0	0	0	0	0	0	0	0	0	0	0	0	0	0	0	0	0	0	0	0	0	0	0	0	0	0
VFG038548(gb|YP_855990)_(flpB)_Flp_pilus_assembly_protein_[Flp_type_IV_pili_(CVF784)]_[Aeromonas_hydrophila_subsp._hydrophila_ATCC_7966]	Aeromonas_hydrophila_subsp._hydrophila_ATCC_7966]	flpB	0	0	2	0	0	0	0	0	0	0	0	0	0	0	0	0	0	0	0	0	0	0	0	0	0	0	0	0	0	0	0	0	0	0	0	0	0	0	0	0	0	0	0	0	0	0	0
VFG038391(gb|YP_856373)_(AHA_1839)_Type_VI_secretion_system_protein_[T6SS_(SS194)]_[Aeromonas_hydrophila_subsp._hydrophila_ATCC_7966]	Aeromonas_hydrophila_subsp._hydrophila_ATCC_7966]	AHA_1839	0	0	2	0	0	0	0	0	0	0	0	0	0	0	0	0	0	0	0	0	0	0	0	0	0	0	0	0	0	0	0	0	0	0	0	0	0	0	0	0	0	0	0	0	0	0	0
VFG038520(gb|YP_855997)_(flpI)_Flp_pilus_assembly_protein_FlpI_[Flp_type_IV_pili_(CVF784)]_[Aeromonas_hydrophila_subsp._hydrophila_ATCC_7966]	Aeromonas_hydrophila_subsp._hydrophila_ATCC_7966]	flpI	0	0	2	0	0	0	0	0	0	0	0	0	0	0	0	0	0	0	0	0	0	0	0	0	0	0	0	0	0	0	0	0	0	0	0	0	0	0	0	0	0	0	0	0	0	0	0
VFG038702(gb|YP_855923)_(cheZ)_chemotaxis_protein_CheZ_[ND_(AI144)]_[Aeromonas_hydrophila_subsp._hydrophila_ATCC_7966]	Aeromonas_hydrophila_subsp._hydrophila_ATCC_7966]	cheZ	0	0	2	0	0	0	0	0	0	0	0	0	0	0	0	0	0	0	0	0	0	0	0	0	0	0	0	0	0	0	0	0	0	0	0	0	0	0	0	0	0	0	0	0	0	0	0
VFG038475(gb|YP_855233)_(tppA)_type_IV_pilus_pseudopilin_[Tap_type_IV_pili_(CVF783)]_[Aeromonas_hydrophila_subsp._hydrophila_ATCC_7966]	Aeromonas_hydrophila_subsp._hydrophila_ATCC_7966]	tppA	0	0	2	0	0	0	0	0	0	0	0	0	0	0	0	0	0	0	0	0	0	0	0	0	0	0	0	0	0	0	0	0	0	0	0	0	0	0	0	0	0	0	0	0	0	0	0
VFG038897(gb|YP_856050)_(ahh1)_extracellular_heat-labile_hemolysin_[Extracellular_hemolysin,_AHH1_(CVF791)]_[Aeromonas_hydrophila_subsp._hydrophila_ATCC_7966]	Aeromonas_hydrophila_subsp._hydrophila_ATCC_7966]	ahh1	0	0	2	0	0	0	0	0	0	0	0	0	0	0	0	0	0	0	0	0	0	0	0	0	0	0	0	0	0	0	0	0	0	0	0	0	0	0	0	0	0	0	0	0	0	0	0
VFG038586(gb|YP_854922)_(mshG)_MSHA_(mannose-sensitive_hemagglutinin)_pili_biogenesis_protein_MshG,_GspF-like_[Mannose-sensitive_hemagglutinin_(Msh)_pilus,_type_IV_pili_(CVF785)]_[Aeromonas_hydrophila_subsp._hydrophila_ATCC_7966]	Aeromonas_hydrophila_subsp._hydrophila_ATCC_7966]	mshG	0	0	2	0	0	0	0	0	0	0	0	0	0	0	0	0	0	0	0	0	0	0	0	0	0	0	0	0	0	0	0	0	0	0	0	0	0	0	0	0	0	0	0	0	0	0	0
VFG038642(gb|YP_855908)_(fliJ)_flagellar_export_protein_FliJ_[ND_(AI144)]_[Aeromonas_hydrophila_subsp._hydrophila_ATCC_7966]	Aeromonas_hydrophila_subsp._hydrophila_ATCC_7966]	fliJ	0	0	2	0	0	0	0	0	0	0	0	0	0	0	0	0	0	0	0	0	0	0	0	0	0	0	0	0	0	0	0	0	0	0	0	0	0	0	0	0	0	0	0	0	0	0	0
VFG038312(gb|YP_855112)_(exeN)_general_secretion_pathway_protein_N_[exe_(SS209)]_[Aeromonas_hydrophila_subsp._hydrophila_ATCC_7966]	Aeromonas_hydrophila_subsp._hydrophila_ATCC_7966]	exeN	0	0	2	0	0	0	0	0	0	0	0	0	0	0	0	0	0	0	0	0	0	0	0	0	0	0	0	0	0	0	0	0	0	0	0	0	0	0	0	0	0	0	0	0	0	0	0
VFG038646(gb|YP_855909)_(fliK)_flagellar_hook-length_control_protein_FliK_[ND_(AI144)]_[Aeromonas_hydrophila_subsp._hydrophila_ATCC_7966]	Aeromonas_hydrophila_subsp._hydrophila_ATCC_7966]	fliK	0	0	2	0	0	0	0	0	0	0	0	0	0	0	0	0	0	0	0	0	0	0	0	0	0	0	0	0	0	0	0	0	0	0	0	0	0	0	0	0	0	0	0	0	0	0	0
VFG038580(gb|YP_854924)_(mshA)_MSHA_(mannose-sensitive_hemagglutinin)_pili_minor_prepilin_protein_MshB_[Mannose-sensitive_hemagglutinin_(Msh)_pilus,_type_IV_pili_(CVF785)]_[Aeromonas_hydrophila_subsp._hydrophila_ATCC_7966]	Aeromonas_hydrophila_subsp._hydrophila_ATCC_7966]	mshA	0	0	2	0	0	0	0	0	0	0	0	0	0	0	0	0	0	0	0	0	0	0	0	0	0	0	0	0	0	0	0	0	0	0	0	0	0	0	0	0	0	0	0	0	0	0	0
VFG038895(gb|YP_855347)_(ast)_thermostable_cytotonic_enterotoxin_[Heat-stable_cytotonic_enterotoxin,_Ast_(CVF789)]_[Aeromonas_hydrophila_subsp._hydrophila_ATCC_7966]	Aeromonas_hydrophila_subsp._hydrophila_ATCC_7966]	ast	0	0	2	0	0	0	0	0	0	0	0	0	0	0	0	0	0	0	0	0	0	0	0	0	0	0	0	0	0	0	0	0	0	0	0	0	0	0	0	0	0	0	0	0	0	0	0
VFG038706(gb|YP_855924)_(cheA-2)_chemotaxis_protein_CheA_[ND_(AI144)]_[Aeromonas_hydrophila_subsp._hydrophila_ATCC_7966]	Aeromonas_hydrophila_subsp._hydrophila_ATCC_7966]	cheA-2	0	0	2	0	0	0	0	0	0	0	0	0	0	0	0	0	0	0	0	0	0	0	0	0	0	0	0	0	0	0	0	0	0	0	0	0	0	0	0	0	0	0	0	0	0	0	0
VFG038288(gb|YP_855106)_(exeH)_general_secretion_pathway_protein_H_[exe_(SS209)]_[Aeromonas_hydrophila_subsp._hydrophila_ATCC_7966]	Aeromonas_hydrophila_subsp._hydrophila_ATCC_7966]	exeH	0	0	2	0	0	0	0	0	0	0	0	0	0	0	0	0	0	0	0	0	0	0	0	0	0	0	0	0	0	0	0	0	0	0	0	0	0	0	0	0	0	0	0	0	0	0	0
VFG038914(gb|YP_855897)_(rtxC)_cytolysin-activating_lysine-acyltransferase_RtxC_[The_repeat_in_toxin_(RTX)_(CVF795)]_[Aeromonas_hydrophila_subsp._hydrophila_ATCC_7966]	Aeromonas_hydrophila_subsp._hydrophila_ATCC_7966]	rtxC	0	0	2	0	0	0	0	0	0	0	0	0	0	0	0	0	0	0	0	0	0	0	0	0	0	0	0	0	0	0	0	0	0	0	0	0	0	0	0	0	0	0	0	0	0	0	0
VFG038791(gb|YP_857342)_(flgF)_flagellar_basal-body_rod_protein_FlgF_[ND_(AI144)]_[Aeromonas_hydrophila_subsp._hydrophila_ATCC_7966]	Aeromonas_hydrophila_subsp._hydrophila_ATCC_7966]	flgF	0	0	2	0	0	0	0	0	0	0	0	0	0	0	0	0	0	0	0	0	0	0	0	0	0	0	0	0	0	0	0	0	0	0	0	0	0	0	0	0	0	0	0	0	0	0	0
VFG038734(gb|YP_856235)_(flaB)_flagellin_[ND_(AI144)]_[Aeromonas_hydrophila_subsp._hydrophila_ATCC_7966]	Aeromonas_hydrophila_subsp._hydrophila_ATCC_7966]	flaB	0	0	2	0	0	0	0	0	0	0	0	0	0	0	0	0	0	0	0	0	0	0	0	0	0	0	0	0	0	0	0	0	0	0	0	0	0	0	0	0	0	0	0	0	0	0	0
VFG038670(gb|YP_855915)_(fliQ)_flagellar_biosynthetic_protein_FliQ_[ND_(AI144)]_[Aeromonas_hydrophila_subsp._hydrophila_ATCC_7966]	Aeromonas_hydrophila_subsp._hydrophila_ATCC_7966]	fliQ	0	0	2	0	0	0	0	0	0	0	0	0	0	0	0	0	0	0	0	0	0	0	0	0	0	0	0	0	0	0	0	0	0	0	0	0	0	0	0	0	0	0	0	0	0	0	0
VFG038718(gb|YP_855927)_(pomB)_ompA_family_protein_[ND_(AI144)]_[Aeromonas_hydrophila_subsp._hydrophila_ATCC_7966]	Aeromonas_hydrophila_subsp._hydrophila_ATCC_7966]	pomB	0	0	2	0	0	0	0	0	0	0	0	0	0	0	0	0	0	0	0	0	0	0	0	0	0	0	0	0	0	0	0	0	0	0	0	0	0	0	0	0	0	0	0	0	0	0	0
VFG038374(gb|YP_856363)_(AHA_1829)_Type_VI_secretion_system_protein_[T6SS_(SS194)]_[Aeromonas_hydrophila_subsp._hydrophila_ATCC_7966]	Aeromonas_hydrophila_subsp._hydrophila_ATCC_7966]	AHA_1829	0	0	2	0	0	0	0	0	0	0	0	0	0	0	0	0	0	0	0	0	0	0	0	0	0	0	0	0	0	0	0	0	0	0	0	0	0	0	0	0	0	0	0	0	0	0	0
VFG038592(gb|YP_854920)_(mshN)_Tetratricopeptide_repeat_protein,_PilF-like_[Mannose-sensitive_hemagglutinin_(Msh)_pilus,_type_IV_pili_(CVF785)]_[Aeromonas_hydrophila_subsp._hydrophila_ATCC_7966]	Aeromonas_hydrophila_subsp._hydrophila_ATCC_7966]	mshN	0	0	2	0	0	0	0	0	0	0	0	0	0	0	0	0	0	0	0	0	0	0	0	0	0	0	0	0	0	0	0	0	0	0	0	0	0	0	0	0	0	0	0	0	0	0	0
VFG038500(gb|YP_857189)_(tapV)_type_IV_pilus_assembly_protein_TapV_[Tap_type_IV_pili_(CVF783)]_[Aeromonas_hydrophila_subsp._hydrophila_ATCC_7966]	Aeromonas_hydrophila_subsp._hydrophila_ATCC_7966]	tapV	0	0	2	0	0	0	0	0	0	0	0	0	0	0	0	0	0	0	0	0	0	0	0	0	0	0	0	0	0	0	0	0	0	0	0	0	0	0	0	0	0	0	0	0	0	0	0
VFG038686(gb|YP_855919)_(flhF)_flagellar_biosynthesis_protein_FlhF_[ND_(AI144)]_[Aeromonas_hydrophila_subsp._hydrophila_ATCC_7966]	Aeromonas_hydrophila_subsp._hydrophila_ATCC_7966]	flhF	0	0	2	0	0	0	0	0	0	0	0	0	0	0	0	0	0	0	0	0	0	0	0	0	0	0	0	0	0	0	0	0	0	0	0	0	0	0	0	0	0	0	0	0	0	0	0
VFG038844(gb|YP_858601)_(nueA)_NeuA_protein_[Polar_flagella_(CVF786)]_[Aeromonas_hydrophila_subsp._hydrophila_ATCC_7966]	Aeromonas_hydrophila_subsp._hydrophila_ATCC_7966]	nueA	0	0	2	0	0	0	0	0	0	0	0	0	0	0	0	0	0	0	0	0	0	0	0	0	0	0	0	0	0	0	0	0	0	0	0	0	0	0	0	0	0	0	0	0	0	0	0
VFG038544(gb|YP_855991)_(flpC)_Flp_pilus_secretin_FlpC_[Flp_type_IV_pili_(CVF784)]_[Aeromonas_hydrophila_subsp._hydrophila_ATCC_7966]	Aeromonas_hydrophila_subsp._hydrophila_ATCC_7966]	flpC	0	0	2	0	0	0	0	0	0	0	0	0	0	0	0	0	0	0	0	0	0	0	0	0	0	0	0	0	0	0	0	0	0	0	0	0	0	0	0	0	0	0	0	0	0	0	0
VFG038378(gb|YP_856366)_(AHA_1832)_Type_VI_secretion_system_contractile_sheath_small_subunit_TssB/VipA_[T6SS_(SS194)]_[Aeromonas_hydrophila_subsp._hydrophila_ATCC_7966]	Aeromonas_hydrophila_subsp._hydrophila_ATCC_7966]	AHA_1832	0	0	2	0	0	0	0	0	0	0	0	0	0	0	0	0	0	0	0	0	0	0	0	0	0	0	0	0	0	0	0	0	0	0	0	0	0	0	0	0	0	0	0	0	0	0	0
VFG038393(gb|YP_856374)_(AHA_1840)_Type_VI_secretion_system_protein_DotU_[T6SS_(SS194)]_[Aeromonas_hydrophila_subsp._hydrophila_ATCC_7966]	Aeromonas_hydrophila_subsp._hydrophila_ATCC_7966]	AHA_1840	0	0	2	0	0	0	0	0	0	0	0	0	0	0	0	0	0	0	0	0	0	0	0	0	0	0	0	0	0	0	0	0	0	0	0	0	0	0	0	0	0	0	0	0	0	0	0
VFG038571(gb|YP_854926)_(mshD)_MSHA_(mannose-sensitive_hemagglutinin)_pili_minor_prepilin_protein_MshD_[Mannose-sensitive_hemagglutinin_(Msh)_pilus,_type_IV_pili_(CVF785)]_[Aeromonas_hydrophila_subsp._hydrophila_ATCC_7966]	Aeromonas_hydrophila_subsp._hydrophila_ATCC_7966]	mshD	0	0	2	0	0	0	0	0	0	0	0	0	0	0	0	0	0	0	0	0	0	0	0	0	0	0	0	0	0	0	0	0	0	0	0	0	0	0	0	0	0	0	0	0	0	0	0
VFG038532(gb|YP_855994)_(flpF)_traffic_ATPase_[Flp_type_IV_pili_(CVF784)]_[Aeromonas_hydrophila_subsp._hydrophila_ATCC_7966]	Aeromonas_hydrophila_subsp._hydrophila_ATCC_7966]	flpF	0	0	2	0	0	0	0	0	0	0	0	0	0	0	0	0	0	0	0	0	0	0	0	0	0	0	0	0	0	0	0	0	0	0	0	0	0	0	0	0	0	0	0	0	0	0	0
VFG038467(gb|YP_858122)_(tapU)_twitching_ATPase_[Tap_type_IV_pili_(CVF783)]_[Aeromonas_hydrophila_subsp._hydrophila_ATCC_7966]	Aeromonas_hydrophila_subsp._hydrophila_ATCC_7966]	tapU	0	0	2	0	0	0	0	0	0	0	0	0	0	0	0	0	0	0	0	0	0	0	0	0	0	0	0	0	0	0	0	0	0	0	0	0	0	0	0	0	0	0	0	0	0	0	0
VFG038308(gb|YP_855111)_(exeM)_general_secretion_pathway_protein_M_[exe_(SS209)]_[Aeromonas_hydrophila_subsp._hydrophila_ATCC_7966]	Aeromonas_hydrophila_subsp._hydrophila_ATCC_7966]	exeM	0	0	2	0	0	0	0	0	0	0	0	0	0	0	0	0	0	0	0	0	0	0	0	0	0	0	0	0	0	0	0	0	0	0	0	0	0	0	0	0	0	0	0	0	0	0	0
VFG038815(gb|YP_857348)_(cheV)_CheV_[ND_(AI144)]_[Aeromonas_hydrophila_subsp._hydrophila_ATCC_7966]	Aeromonas_hydrophila_subsp._hydrophila_ATCC_7966]	cheV	0	0	2	0	0	0	0	0	0	0	0	0	0	0	0	0	0	0	0	0	0	0	0	0	0	0	0	0	0	0	0	0	0	0	0	0	0	0	0	0	0	0	0	0	0	0	0
VFG038376(gb|YP_856365)_(AHA_1831)_Type_VI_secretion_system_protein_[T6SS_(SS194)]_[Aeromonas_hydrophila_subsp._hydrophila_ATCC_7966]	Aeromonas_hydrophila_subsp._hydrophila_ATCC_7966]	AHA_1831	0	0	2	0	0	0	0	0	0	0	0	0	0	0	0	0	0	0	0	0	0	0	0	0	0	0	0	0	0	0	0	0	0	0	0	0	0	0	0	0	0	0	0	0	0	0	0
VFG038710(gb|YP_855925)_(cheB-2)_chemotaxis-specific_methylesterase_[ND_(AI144)]_[Aeromonas_hydrophila_subsp._hydrophila_ATCC_7966]	Aeromonas_hydrophila_subsp._hydrophila_ATCC_7966]	cheB-2	0	0	2	0	0	0	0	0	0	0	0	0	0	0	0	0	0	0	0	0	0	0	0	0	0	0	0	0	0	0	0	0	0	0	0	0	0	0	0	0	0	0	0	0	0	0	0
VFG038280(gb|YP_855104)_(exeF)_general_secretion_pathway_protein_F_[exe_(SS209)]_[Aeromonas_hydrophila_subsp._hydrophila_ATCC_7966]	Aeromonas_hydrophila_subsp._hydrophila_ATCC_7966]	exeF	0	0	2	0	0	0	0	0	0	0	0	0	0	0	0	0	0	0	0	0	0	0	0	0	0	0	0	0	0	0	0	0	0	0	0	0	0	0	0	0	0	0	0	0	0	0	0
VFG038540(gb|YP_855992)_(flpD)_Flp_pilus_assembly_protein_FlpD_[Flp_type_IV_pili_(CVF784)]_[Aeromonas_hydrophila_subsp._hydrophila_ATCC_7966]	Aeromonas_hydrophila_subsp._hydrophila_ATCC_7966]	flpD	0	0	2	0	0	0	0	0	0	0	0	0	0	0	0	0	0	0	0	0	0	0	0	0	0	0	0	0	0	0	0	0	0	0	0	0	0	0	0	0	0	0	0	0	0	0	0
VFG038842(gi:117618361)_(AHA_4177)_hypothetical_protein_[Polar_flagella_(CVF786)]_[Aeromonas_hydrophila_subsp._hydrophila_ATCC_7966]	Aeromonas_hydrophila_subsp._hydrophila_ATCC_7966]	AHA_4177	0	0	2	0	0	0	0	0	0	0	0	0	0	0	0	0	0	0	0	0	0	0	0	0	0	0	0	0	0	0	0	0	0	0	0	0	0	0	0	0	0	0	0	0	0	0	0
VFG038698(gb|YP_855922)_(cheY)_chemotaxis_protein_CheY_[ND_(AI144)]_[Aeromonas_hydrophila_subsp._hydrophila_ATCC_7966]	Aeromonas_hydrophila_subsp._hydrophila_ATCC_7966]	cheY	0	0	2	0	0	0	0	0	0	0	0	0	0	0	0	0	0	0	0	0	0	0	0	0	0	0	0	0	0	0	0	0	0	0	0	0	0	0	0	0	0	0	0	0	0	0	0
VFG038915(gb|YP_855896)_(rtxH)_conserved_hypothetical_protein_in_rtx_gene_loci_[The_repeat_in_toxin_(RTX)_(CVF795)]_[Aeromonas_hydrophila_subsp._hydrophila_ATCC_7966]	Aeromonas_hydrophila_subsp._hydrophila_ATCC_7966]	rtxH	0	0	2	0	0	0	0	0	0	0	0	0	0	0	0	0	0	0	0	0	0	0	0	0	0	0	0	0	0	0	0	0	0	0	0	0	0	0	0	0	0	0	0	0	0	0	0
VFG038512(gb|YP_855999)_(flpK)_Flp_pilus_pseudopilin_[Flp_type_IV_pili_(CVF784)]_[Aeromonas_hydrophila_subsp._hydrophila_ATCC_7966]	Aeromonas_hydrophila_subsp._hydrophila_ATCC_7966]	flpK	0	0	2	0	0	0	0	0	0	0	0	0	0	0	0	0	0	0	0	0	0	0	0	0	0	0	0	0	0	0	0	0	0	0	0	0	0	0	0	0	0	0	0	0	0	0	0
VFG038369(gb|YP_856360)_(hcp)_hemolysin_co-regulated_protein_[T6SS_(SS194)]_[Aeromonas_hydrophila_subsp._hydrophila_ATCC_7966]	Aeromonas_hydrophila_subsp._hydrophila_ATCC_7966]	hcp	0	0	2	0	0	0	0	0	0	0	0	0	0	0	0	0	0	0	0	0	0	0	0	0	0	0	0	0	0	0	0	0	0	0	0	0	0	0	0	0	0	0	0	0	0	0	0
VFG038730(gb|YP_856234)_(flaA)_flagellin_[ND_(AI144)]_[Aeromonas_hydrophila_subsp._hydrophila_ATCC_7966]	Aeromonas_hydrophila_subsp._hydrophila_ATCC_7966]	flaA	0	0	2	0	0	0	0	0	0	0	0	0	0	0	0	0	0	0	0	0	0	0	0	0	0	0	0	0	0	0	0	0	0	0	0	0	0	0	0	0	0	0	0	0	0	0	0
VFG038408(gb|YP_855052)_(fimA)_fimbrial_protein_[Type_I_fimbriae_(CVF796)]_[Aeromonas_hydrophila_subsp._hydrophila_ATCC_7966]	Aeromonas_hydrophila_subsp._hydrophila_ATCC_7966]	fimA	0	0	2	0	0	0	0	0	0	0	0	0	0	0	0	0	0	0	0	0	0	0	0	0	0	0	0	0	0	0	0	0	0	0	0	0	0	0	0	0	0	0	0	0	0	0	0
VFG038755(gb|YP_857328)_(fleR/flrC)_transcriptional_activator_[ND_(AI144)]_[Aeromonas_hydrophila_subsp._hydrophila_ATCC_7966]	Aeromonas_hydrophila_subsp._hydrophila_ATCC_7966]	fleR/flrC	0	0	2	0	0	0	0	0	0	0	0	0	0	0	0	0	0	0	0	0	0	0	0	0	0	0	0	0	0	0	0	0	0	0	0	0	0	0	0	0	0	0	0	0	0	0	0
VFG044235(gb|YP_856993)_(amoA)_isochorismate_synthases_[amonabactin_(IA020)]_[Aeromonas_hydrophila_subsp._hydrophila_ATCC_7966]	Aeromonas_hydrophila_subsp._hydrophila_ATCC_7966]	amoA	0	0	2	0	0	0	0	0	0	0	0	0	0	0	0	0	0	0	0	0	0	0	0	0	0	0	0	0	0	0	0	0	0	0	0	0	0	0	0	0	0	0	0	0	0	0	0
VFG038638(gb|YP_855907)_(fliI)_flagellum-specific_ATP_synthase_[ND_(AI144)]_[Aeromonas_hydrophila_subsp._hydrophila_ATCC_7966]	Aeromonas_hydrophila_subsp._hydrophila_ATCC_7966]	fliI	0	0	2	0	0	0	0	0	0	0	0	0	0	0	0	0	0	0	0	0	0	0	0	0	0	0	0	0	0	0	0	0	0	0	0	0	0	0	0	0	0	0	0	0	0	0	0
VFG038917(gb|YP_855894)_(rtxD)_RTX_toxin_transporter,_transmembrane_protein_linking_with_the_outer_membrane_porin_TolC_[The_repeat_in_toxin_(RTX)_(CVF795)]_[Aeromonas_hydrophila_subsp._hydrophila_ATCC_7966]	Aeromonas_hydrophila_subsp._hydrophila_ATCC_7966]	rtxD	0	0	2	0	0	0	0	0	0	0	0	0	0	0	0	0	0	0	0	0	0	0	0	0	0	0	0	0	0	0	0	0	0	0	0	0	0	0	0	0	0	0	0	0	0	0	0
VFG038272(gb|YP_855102)_(exeD)_general_secretion_pathway_protein_D_[exe_(SS209)]_[Aeromonas_hydrophila_subsp._hydrophila_ATCC_7966]	Aeromonas_hydrophila_subsp._hydrophila_ATCC_7966]	exeD	0	0	2	0	0	0	0	0	0	0	0	0	0	0	0	0	0	0	0	0	0	0	0	0	0	0	0	0	0	0	0	0	0	0	0	0	0	0	0	0	0	0	0	0	0	0	0
VFG038799(gb|YP_857344)_(flgD)_flagellar_hook_capping_protein_[ND_(AI144)]_[Aeromonas_hydrophila_subsp._hydrophila_ATCC_7966]	Aeromonas_hydrophila_subsp._hydrophila_ATCC_7966]	flgD	0	0	2	0	0	0	0	0	0	0	0	0	0	0	0	0	0	0	0	0	0	0	0	0	0	0	0	0	0	0	0	0	0	0	0	0	0	0	0	0	0	0	0	0	0	0	0
VFG038650(gb|YP_855910)_(fliL)_flagellar_basal_body-associated_protein_FliL_[ND_(AI144)]_[Aeromonas_hydrophila_subsp._hydrophila_ATCC_7966]	Aeromonas_hydrophila_subsp._hydrophila_ATCC_7966]	fliL	0	0	2	0	0	0	0	0	0	0	0	0	0	0	0	0	0	0	0	0	0	0	0	0	0	0	0	0	0	0	0	0	0	0	0	0	0	0	0	0	0	0	0	0	0	0	0
VFG038783(gb|YP_857340)_(flgH)_flagellar_basal_body_L-ring_protein_[ND_(AI144)]_[Aeromonas_hydrophila_subsp._hydrophila_ATCC_7966]	Aeromonas_hydrophila_subsp._hydrophila_ATCC_7966]	flgH	0	0	2	0	0	0	0	0	0	0	0	0	0	0	0	0	0	0	0	0	0	0	0	0	0	0	0	0	0	0	0	0	0	0	0	0	0	0	0	0	0	0	0	0	0	0	0
VFG038654(gb|YP_855911)_(fliM)_flagellar_motor_switch_protein_FliM_[ND_(AI144)]_[Aeromonas_hydrophila_subsp._hydrophila_ATCC_7966]	Aeromonas_hydrophila_subsp._hydrophila_ATCC_7966]	fliM	0	0	2	0	0	0	0	0	0	0	0	0	0	0	0	0	0	0	0	0	0	0	0	0	0	0	0	0	0	0	0	0	0	0	0	0	0	0	0	0	0	0	0	0	0	0	0
VFG038626(gb|YP_855904)_(fliF)_flagellar_MS-ring_protein_[ND_(AI144)]_[Aeromonas_hydrophila_subsp._hydrophila_ATCC_7966]	Aeromonas_hydrophila_subsp._hydrophila_ATCC_7966]	fliF	0	0	2	0	0	0	0	0	0	0	0	0	0	0	0	0	0	0	0	0	0	0	0	0	0	0	0	0	0	0	0	0	0	0	0	0	0	0	0	0	0	0	0	0	0	0	0
VFG038296(gb|YP_855108)_(exeJ)_general_secretion_pathway_protein_J_[exe_(SS209)]_[Aeromonas_hydrophila_subsp._hydrophila_ATCC_7966]	Aeromonas_hydrophila_subsp._hydrophila_ATCC_7966]	exeJ	0	0	2	0	0	0	0	0	0	0	0	0	0	0	0	0	0	0	0	0	0	0	0	0	0	0	0	0	0	0	0	0	0	0	0	0	0	0	0	0	0	0	0	0	0	0	0
VFG038803(gb|YP_857345)_(flgC)_flagellar_basal_body_rod_protein_FlgC_[ND_(AI144)]_[Aeromonas_hydrophila_subsp._hydrophila_ATCC_7966]	Aeromonas_hydrophila_subsp._hydrophila_ATCC_7966]	flgC	0	0	2	0	0	0	0	0	0	0	0	0	0	0	0	0	0	0	0	0	0	0	0	0	0	0	0	0	0	0	0	0	0	0	0	0	0	0	0	0	0	0	0	0	0	0	0
VFG038552(gb|YP_855989)_(flpA)_prepilin_peptidase_[Flp_type_IV_pili_(CVF784)]_[Aeromonas_hydrophila_subsp._hydrophila_ATCC_7966]	Aeromonas_hydrophila_subsp._hydrophila_ATCC_7966]	flpA	0	0	2	0	0	0	0	0	0	0	0	0	0	0	0	0	0	0	0	0	0	0	0	0	0	0	0	0	0	0	0	0	0	0	0	0	0	0	0	0	0	0	0	0	0	0	0
VFG038850(gb|YP_858603)_(nueB)_pseudaminic_acid_synthase,_NeuB_[Polar_flagella_(CVF786)]_[Aeromonas_hydrophila_subsp._hydrophila_ATCC_7966]	Aeromonas_hydrophila_subsp._hydrophila_ATCC_7966]	nueB	0	0	2	0	0	0	0	0	0	0	0	0	0	0	0	0	0	0	0	0	0	0	0	0	0	0	0	0	0	0	0	0	0	0	0	0	0	0	0	0	0	0	0	0	0	0	0
VFG038536(gb|YP_855993)_(flpE)_Flp_pilus_assembly_protein,_ATPase_[Flp_type_IV_pili_(CVF784)]_[Aeromonas_hydrophila_subsp._hydrophila_ATCC_7966]	Aeromonas_hydrophila_subsp._hydrophila_ATCC_7966]	flpE	0	0	2	0	0	0	0	0	0	0	0	0	0	0	0	0	0	0	0	0	0	0	0	0	0	0	0	0	0	0	0	0	0	0	0	0	0	0	0	0	0	0	0	0	0	0	0
VFG038714(gb|YP_855926)_(motA)_chemotaxis_protein_MotA_[ND_(AI144)]_[Aeromonas_hydrophila_subsp._hydrophila_ATCC_7966]	Aeromonas_hydrophila_subsp._hydrophila_ATCC_7966]	motA	0	0	2	0	0	0	0	0	0	0	0	0	0	0	0	0	0	0	0	0	0	0	0	0	0	0	0	0	0	0	0	0	0	0	0	0	0	0	0	0	0	0	0	0	0	0	0
VFG038666(gb|YP_855914)_(fliP)_flagellar_biosynthesis_protein_FliP_[ND_(AI144)]_[Aeromonas_hydrophila_subsp._hydrophila_ATCC_7966]	Aeromonas_hydrophila_subsp._hydrophila_ATCC_7966]	fliP	0	0	2	0	0	0	0	0	0	0	0	0	0	0	0	0	0	0	0	0	0	0	0	0	0	0	0	0	0	0	0	0	0	0	0	0	0	0	0	0	0	0	0	0	0	0	0
VFG038412(gb|YP_855054)_(fimC)_outer_membrane_usher_protein_[Type_I_fimbriae_(CVF796)]_[Aeromonas_hydrophila_subsp._hydrophila_ATCC_7966]	Aeromonas_hydrophila_subsp._hydrophila_ATCC_7966]	fimC	0	0	2	0	0	0	0	0	0	0	0	0	0	0	0	0	0	0	0	0	0	0	0	0	0	0	0	0	0	0	0	0	0	0	0	0	0	0	0	0	0	0	0	0	0	0	0
VFG038399(gb|YP_856377)_(AHA_1843)_Type_VI_secretion_system_protein_[T6SS_(SS194)]_[Aeromonas_hydrophila_subsp._hydrophila_ATCC_7966]	Aeromonas_hydrophila_subsp._hydrophila_ATCC_7966]	AHA_1843	0	0	2	0	0	0	0	0	0	0	0	0	0	0	0	0	0	0	0	0	0	0	0	0	0	0	0	0	0	0	0	0	0	0	0	0	0	0	0	0	0	0	0	0	0	0	0
VFG038726(gb|YP_855929)_(cheW)_chemotaxis_protein_CheW_[Polar_flagella_(CVF786)]_[Aeromonas_hydrophila_subsp._hydrophila_ATCC_7966]	Aeromonas_hydrophila_subsp._hydrophila_ATCC_7966]	cheW	0	0	2	0	0	0	0	0	0	0	0	0	0	0	0	0	0	0	0	0	0	0	0	0	0	0	0	0	0	0	0	0	0	0	0	0	0	0	0	0	0	0	0	0	0	0	0
VFG038795(gb|YP_857343)_(flgE)_flagellar_hook_protein_FlgE_[ND_(AI144)]_[Aeromonas_hydrophila_subsp._hydrophila_ATCC_7966]	Aeromonas_hydrophila_subsp._hydrophila_ATCC_7966]	flgE	0	0	2	0	0	0	0	0	0	0	0	0	0	0	0	0	0	0	0	0	0	0	0	0	0	0	0	0	0	0	0	0	0	0	0	0	0	0	0	0	0	0	0	0	0	0	0
VFG038492(gb|YP_855228)_(tppE)_type_IV_pilus_pseudopilin_[Tap_type_IV_pili_(CVF783)]_[Aeromonas_hydrophila_subsp._hydrophila_ATCC_7966]	Aeromonas_hydrophila_subsp._hydrophila_ATCC_7966]	tppE	0	0	2	0	0	0	0	0	0	0	0	0	0	0	0	0	0	0	0	0	0	0	0	0	0	0	0	0	0	0	0	0	0	0	0	0	0	0	0	0	0	0	0	0	0	0	0
VFG038787(gb|YP_857341)_(flgG)_flagellar_basal_body_rod_protein_FlgG_[ND_(AI144)]_[Aeromonas_hydrophila_subsp._hydrophila_ATCC_7966]	Aeromonas_hydrophila_subsp._hydrophila_ATCC_7966]	flgG	0	0	2	0	0	0	0	0	0	0	0	0	0	0	0	0	0	0	0	0	0	0	0	0	0	0	0	0	0	0	0	0	0	0	0	0	0	0	0	0	0	0	0	0	0	0	0
VFG038752(gb|YP_857151)_(motY)_sodium-type_flagellar_protein_MotY_[Polar_flagella_(CVF786)]_[Aeromonas_hydrophila_subsp._hydrophila_ATCC_7966]	Aeromonas_hydrophila_subsp._hydrophila_ATCC_7966]	motY	0	0	2	0	0	0	0	0	0	0	0	0	0	0	0	0	0	0	0	0	0	0	0	0	0	0	0	0	0	0	0	0	0	0	0	0	0	0	0	0	0	0	0	0	0	0	0
VFG038908(gb|YP_857708)_(AHA_3217)_thermostable_hemolysin_[Thermostable_hemolysin_(TH)_(CVF794)]_[Aeromonas_hydrophila_subsp._hydrophila_ATCC_7966]	Aeromonas_hydrophila_subsp._hydrophila_ATCC_7966]	AHA_3217	0	0	2	0	0	0	0	0	0	0	0	0	0	0	0	0	0	0	0	0	0	0	0	0	0	0	0	0	0	0	0	0	0	0	0	0	0	0	0	0	0	0	0	0	0	0	0
VFG038300(gb|YP_855109)_(exeK)_general_secretion_pathway_protein_K_[exe_(SS209)]_[Aeromonas_hydrophila_subsp._hydrophila_ATCC_7966]	Aeromonas_hydrophila_subsp._hydrophila_ATCC_7966]	exeK	0	0	2	0	0	0	0	0	0	0	0	0	0	0	0	0	0	0	0	0	0	0	0	0	0	0	0	0	0	0	0	0	0	0	0	0	0	0	0	0	0	0	0	0	0	0	0
VFG038304(gb|YP_855110)_(exeL)_general_secretion_pathway_protein_L_[exe_(SS209)]_[Aeromonas_hydrophila_subsp._hydrophila_ATCC_7966]	Aeromonas_hydrophila_subsp._hydrophila_ATCC_7966]	exeL	0	0	2	0	0	0	0	0	0	0	0	0	0	0	0	0	0	0	0	0	0	0	0	0	0	0	0	0	0	0	0	0	0	0	0	0	0	0	0	0	0	0	0	0	0	0	0
VFG038556(gb|YP_855988)_(flp1)_Flp_pilus_pilin_subunit_[Flp_type_IV_pili_(CVF784)]_[Aeromonas_hydrophila_subsp._hydrophila_ATCC_7966]	Aeromonas_hydrophila_subsp._hydrophila_ATCC_7966]	flp1	0	0	2	0	0	0	0	0	0	0	0	0	0	0	0	0	0	0	0	0	0	0	0	0	0	0	0	0	0	0	0	0	0	0	0	0	0	0	0	0	0	0	0	0	0	0	0
VFG038690(gb|YP_855920)_(fleN)_CobQ/CobB/MinD/ParA_family_protein_[ND_(AI144)]_[Aeromonas_hydrophila_subsp._hydrophila_ATCC_7966]	Aeromonas_hydrophila_subsp._hydrophila_ATCC_7966]	fleN	0	0	2	0	0	0	0	0	0	0	0	0	0	0	0	0	0	0	0	0	0	0	0	0	0	0	0	0	0	0	0	0	0	0	0	0	0	0	0	0	0	0	0	0	0	0	0
VFG038447(gb|YP_857684)_(tapN)_type_IV_pilus_biogenesis_protein_PilN_[Tap_type_IV_pili_(CVF783)]_[Aeromonas_hydrophila_subsp._hydrophila_ATCC_7966]	Aeromonas_hydrophila_subsp._hydrophila_ATCC_7966]	tapN	0	0	2	0	0	0	0	0	0	0	0	0	0	0	0	0	0	0	0	0	0	0	0	0	0	0	0	0	0	0	0	0	0	0	0	0	0	0	0	0	0	0	0	0	0	0	0
VFG038595(gb|YP_854919)_(mshM)_membrane_protein_with_ATPase_domain,_GspA-like_[Mannose-sensitive_hemagglutinin_(Msh)_pilus,_type_IV_pili_(CVF785)]_[Aeromonas_hydrophila_subsp._hydrophila_ATCC_7966]	Aeromonas_hydrophila_subsp._hydrophila_ATCC_7966]	mshM	0	0	2	0	0	0	0	0	0	0	0	0	0	0	0	0	0	0	0	0	0	0	0	0	0	0	0	0	0	0	0	0	0	0	0	0	0	0	0	0	0	0	0	0	0	0	0
VFG038567(gb|YP_854927)_(mshO)_MSHA_(mannose-sensitive_hemagglutinin)_pili_biogenesis_protein_MshO_[Mannose-sensitive_hemagglutinin_(Msh)_pilus,_type_IV_pili_(CVF785)]_[Aeromonas_hydrophila_subsp._hydrophila_ATCC_7966]	Aeromonas_hydrophila_subsp._hydrophila_ATCC_7966]	mshO	0	0	2	0	0	0	0	0	0	0	0	0	0	0	0	0	0	0	0	0	0	0	0	0	0	0	0	0	0	0	0	0	0	0	0	0	0	0	0	0	0	0	0	0	0	0	0
VFG038373(gb|YP_856362)_(AHA_1828)_Type_VI_secretion_system_protein_[T6SS_(SS194)]_[Aeromonas_hydrophila_subsp._hydrophila_ATCC_7966]	Aeromonas_hydrophila_subsp._hydrophila_ATCC_7966]	AHA_1828	0	0	2	0	0	0	0	0	0	0	0	0	0	0	0	0	0	0	0	0	0	0	0	0	0	0	0	0	0	0	0	0	0	0	0	0	0	0	0	0	0	0	0	0	0	0	0
VFG038508(gb|YP_856000)_(flpL)_Flp_pilus_pseudopilin_[Flp_type_IV_pili_(CVF784)]_[Aeromonas_hydrophila_subsp._hydrophila_ATCC_7966]	Aeromonas_hydrophila_subsp._hydrophila_ATCC_7966]	flpL	0	0	2	0	0	0	0	0	0	0	0	0	0	0	0	0	0	0	0	0	0	0	0	0	0	0	0	0	0	0	0	0	0	0	0	0	0	0	0	0	0	0	0	0	0	0	0
VFG038819(gb|YP_857349)_(flgA)_flagella_basal_body_P-ring_formation_protein_FlgA_[ND_(AI144)]_[Aeromonas_hydrophila_subsp._hydrophila_ATCC_7966]	Aeromonas_hydrophila_subsp._hydrophila_ATCC_7966]	flgA	0	0	2	0	0	0	0	0	0	0	0	0	0	0	0	0	0	0	0	0	0	0	0	0	0	0	0	0	0	0	0	0	0	0	0	0	0	0	0	0	0	0	0	0	0	0	0
VFG038420(gb|YP_855056)_(fimE)_fimbrial_protein_[Type_I_fimbriae_(CVF796)]_[Aeromonas_hydrophila_subsp._hydrophila_ATCC_7966]	Aeromonas_hydrophila_subsp._hydrophila_ATCC_7966]	fimE	0	0	2	0	0	0	0	0	0	0	0	0	0	0	0	0	0	0	0	0	0	0	0	0	0	0	0	0	0	0	0	0	0	0	0	0	0	0	0	0	0	0	0	0	0	0	0
VFG038674(gb|YP_855916)_(fliR)_flagellar_biosynthesis_protein_FliR_[ND_(AI144)]_[Aeromonas_hydrophila_subsp._hydrophila_ATCC_7966]	Aeromonas_hydrophila_subsp._hydrophila_ATCC_7966]	fliR	0	0	2	0	0	0	0	0	0	0	0	0	0	0	0	0	0	0	0	0	0	0	0	0	0	0	0	0	0	0	0	0	0	0	0	0	0	0	0	0	0	0	0	0	0	0	0
VFG038658(gb|YP_855912)_(fliN)_flagellar_motor_switch_protein_FliN_[ND_(AI144)]_[Aeromonas_hydrophila_subsp._hydrophila_ATCC_7966]	Aeromonas_hydrophila_subsp._hydrophila_ATCC_7966]	fliN	0	0	2	0	0	0	0	0	0	0	0	0	0	0	0	0	0	0	0	0	0	0	0	0	0	0	0	0	0	0	0	0	0	0	0	0	0	0	0	0	0	0	0	0	0	0	0
VFG038904(gb|YP_857967)_(AHA_3493)_hemolysin_III_[Hemolysin_III_(CVF793)]_[Aeromonas_hydrophila_subsp._hydrophila_ATCC_7966]	Aeromonas_hydrophila_subsp._hydrophila_ATCC_7966]	AHA_3493	0	0	2	0	0	0	0	0	0	0	0	0	0	0	0	0	0	0	0	0	0	0	0	0	0	0	0	0	0	0	0	0	0	0	0	0	0	0	0	0	0	0	0	0	0	0	0
VFG038496(gb|YP_858148)_(tppF)_type_IV_pilus_pseudopilin_[Tap_type_IV_pili_(CVF783)]_[Aeromonas_hydrophila_subsp._hydrophila_ATCC_7966]	Aeromonas_hydrophila_subsp._hydrophila_ATCC_7966]	tppF	0	0	2	0	0	0	0	0	0	0	0	0	0	0	0	0	0	0	0	0	0	0	0	0	0	0	0	0	0	0	0	0	0	0	0	0	0	0	0	0	0	0	0	0	0	0	0
VFG038763(gb|YP_857330)_(fleQ/flrC)_FleQ_protein_[ND_(AI144)]_[Aeromonas_hydrophila_subsp._hydrophila_ATCC_7966]	Aeromonas_hydrophila_subsp._hydrophila_ATCC_7966]	fleQ/flrC	0	0	2	0	0	0	0	0	0	0	0	0	0	0	0	0	0	0	0	0	0	0	0	0	0	0	0	0	0	0	0	0	0	0	0	0	0	0	0	0	0	0	0	0	0	0	0
VFG038823(gb|YP_857350)_(flgM)_anti-sigma-D_factor_[ND_(AI144)]_[Aeromonas_hydrophila_subsp._hydrophila_ATCC_7966]	Aeromonas_hydrophila_subsp._hydrophila_ATCC_7966]	flgM	0	0	2	0	0	0	0	0	0	0	0	0	0	0	0	0	0	0	0	0	0	0	0	0	0	0	0	0	0	0	0	0	0	0	0	0	0	0	0	0	0	0	0	0	0	0	0
VFG038451(gb|YP_857683)_(tapO)_type_IV_pilus_biogenesis_protein_PilO_[Tap_type_IV_pili_(CVF783)]_[Aeromonas_hydrophila_subsp._hydrophila_ATCC_7966]	Aeromonas_hydrophila_subsp._hydrophila_ATCC_7966]	tapO	0	0	2	0	0	0	0	0	0	0	0	0	0	0	0	0	0	0	0	0	0	0	0	0	0	0	0	0	0	0	0	0	0	0	0	0	0	0	0	0	0	0	0	0	0	0	0
VFG038694(gb|YP_855921)_(fliA)_flagellar_biosynthesis_sigma_factor_[ND_(AI144)]_[Aeromonas_hydrophila_subsp._hydrophila_ATCC_7966]	Aeromonas_hydrophila_subsp._hydrophila_ATCC_7966]	fliA	0	0	2	0	0	0	0	0	0	0	0	0	0	0	0	0	0	0	0	0	0	0	0	0	0	0	0	0	0	0	0	0	0	0	0	0	0	0	0	0	0	0	0	0	0	0	0
VFG038516(gb|YP_855998)_(flpJ)_Flp_pilus_pseudopilin_[Flp_type_IV_pili_(CVF784)]_[Aeromonas_hydrophila_subsp._hydrophila_ATCC_7966]	Aeromonas_hydrophila_subsp._hydrophila_ATCC_7966]	flpJ	0	0	2	0	0	0	0	0	0	0	0	0	0	0	0	0	0	0	0	0	0	0	0	0	0	0	0	0	0	0	0	0	0	0	0	0	0	0	0	0	0	0	0	0	0	0	0
VFG038416(gb|YP_855055)_(fimD)_fimbrial_chaperone_protein_[Type_I_fimbriae_(CVF796)]_[Aeromonas_hydrophila_subsp._hydrophila_ATCC_7966]	Aeromonas_hydrophila_subsp._hydrophila_ATCC_7966]	fimD	0	0	2	0	0	0	0	0	0	0	0	0	0	0	0	0	0	0	0	0	0	0	0	0	0	0	0	0	0	0	0	0	0	0	0	0	0	0	0	0	0	0	0	0	0	0	0
VFG038739(gb|YP_856236)_(flaG)_flagellin_protein_[ND_(AI144)]_[Aeromonas_hydrophila_subsp._hydrophila_ATCC_7966]	Aeromonas_hydrophila_subsp._hydrophila_ATCC_7966]	flaG	0	0	2	0	0	0	0	0	0	0	0	0	0	0	0	0	0	0	0	0	0	0	0	0	0	0	0	0	0	0	0	0	0	0	0	0	0	0	0	0	0	0	0	0	0	0	0
VFG038606(gb|YP_854917)_(mshJ)_MSHA_(mannose-sensitive_hemagglutinin)_pili_biogenesis_protein_MshJ,_bitopic_inner_membrane_protein,_GspM-like_[Mannose-sensitive_hemagglutinin_(Msh)_pilus,_type_IV_pili_(CVF785)]_[Aeromonas_hydrophila_subsp._hydrophila_ATCC_7966]	Aeromonas_hydrophila_subsp._hydrophila_ATCC_7966]	mshJ	0	0	2	0	0	0	0	0	0	0	0	0	0	0	0	0	0	0	0	0	0	0	0	0	0	0	0	0	0	0	0	0	0	0	0	0	0	0	0	0	0	0	0	0	0	0	0
VFG038365(gb|YP_855659)_(hcp1)_HcpA-like_protein_[T6SS_(CVF782)]_[Aeromonas_hydrophila_subsp._hydrophila_ATCC_7966]	Aeromonas_hydrophila_subsp._hydrophila_ATCC_7966]	hcp1	0	0	2	0	0	0	0	0	0	0	0	0	0	0	0	0	0	0	0	0	0	0	0	0	0	0	0	0	0	0	0	0	0	0	0	0	0	0	0	0	0	0	0	0	0	0	0
VFG038610(gb|YP_854916)_(mshI1)_MSHA_(mannose-sensitive_hemagglutinin)_pili_biogenesis_protein_MshI1,_bitopic_inner_membrane_protein_[Mannose-sensitive_hemagglutinin_(Msh)_pilus,_type_IV_pili_(CVF785)]_[Aeromonas_hydrophila_subsp._hydrophila_ATCC_7966]	Aeromonas_hydrophila_subsp._hydrophila_ATCC_7966]	mshI1	0	0	2	0	0	0	0	0	0	0	0	0	0	0	0	0	0	0	0	0	0	0	0	0	0	0	0	0	0	0	0	0	0	0	0	0	0	0	0	0	0	0	0	0	0	0	0
VFG038807(gb|YP_857346)_(flgB)_flagellar_basal-body_rod_protein_FlgB_[ND_(AI144)]_[Aeromonas_hydrophila_subsp._hydrophila_ATCC_7966]	Aeromonas_hydrophila_subsp._hydrophila_ATCC_7966]	flgB	0	0	2	0	0	0	0	0	0	0	0	0	0	0	0	0	0	0	0	0	0	0	0	0	0	0	0	0	0	0	0	0	0	0	0	0	0	0	0	0	0	0	0	0	0	0	0
VFG038264(gb|YP_858234)_(exeB)_general_secretion_pathway_protein_B_[exe_(SS209)]_[Aeromonas_hydrophila_subsp._hydrophila_ATCC_7966]	Aeromonas_hydrophila_subsp._hydrophila_ATCC_7966]	exeB	0	0	2	0	0	0	0	0	0	0	0	0	0	0	0	0	0	0	0	0	0	0	0	0	0	0	0	0	0	0	0	0	0	0	0	0	0	0	0	0	0	0	0	0	0	0	0
VFG038583(gi:117619824)_(mshF)_hypothetical_protein_[Mannose-sensitive_hemagglutinin_(Msh)_pilus,_type_IV_pili_(CVF785)]_[Aeromonas_hydrophila_subsp._hydrophila_ATCC_7966]	Aeromonas_hydrophila_subsp._hydrophila_ATCC_7966]	mshF	0	0	2	0	0	0	0	0	0	0	0	0	0	0	0	0	0	0	0	0	0	0	0	0	0	0	0	0	0	0	0	0	0	0	0	0	0	0	0	0	0	0	0	0	0	0	0
VFG038405(gi:117619593)_(AHA_1847)_PAAR_motif-containing_protein_[T6SS_(SS194)]_[Aeromonas_hydrophila_subsp._hydrophila_ATCC_7966]	Aeromonas_hydrophila_subsp._hydrophila_ATCC_7966]	AHA_1847	0	0	2	0	0	0	0	0	0	0	0	0	0	0	0	0	0	0	0	0	0	0	0	0	0	0	0	0	0	0	0	0	0	0	0	0	0	0	0	0	0	0	0	0	0	0	0
VFG038746(gb|YP_856238)_(flaJ)_flagellar_specific_chaperone_FlaJ/FliS_[ND_(AI144)]_[Aeromonas_hydrophila_subsp._hydrophila_ATCC_7966]	Aeromonas_hydrophila_subsp._hydrophila_ATCC_7966]	flaJ	0	0	2	0	0	0	0	0	0	0	0	0	0	0	0	0	0	0	0	0	0	0	0	0	0	0	0	0	0	0	0	0	0	0	0	0	0	0	0	0	0	0	0	0	0	0	0
VFG038292(gb|YP_855107)_(exeI)_general_secretion_pathway_protein_I_[exe_(SS209)]_[Aeromonas_hydrophila_subsp._hydrophila_ATCC_7966]	Aeromonas_hydrophila_subsp._hydrophila_ATCC_7966]	exeI	0	0	2	0	0	0	0	0	0	0	0	0	0	0	0	0	0	0	0	0	0	0	0	0	0	0	0	0	0	0	0	0	0	0	0	0	0	0	0	0	0	0	0	0	0	0	0
VFG038622(gb|YP_855903)_(fliE)_flagellar_hook-basal_body_complex_protein_FliE_[ND_(AI144)]_[Aeromonas_hydrophila_subsp._hydrophila_ATCC_7966]	Aeromonas_hydrophila_subsp._hydrophila_ATCC_7966]	fliE	0	0	2	0	0	0	0	0	0	0	0	0	0	0	0	0	0	0	0	0	0	0	0	0	0	0	0	0	0	0	0	0	0	0	0	0	0	0	0	0	0	0	0	0	0	0	0
VFG038479(gb|YP_855229)_(tppB)_type_IV_pilus_pseudopilin_[Tap_type_IV_pili_(CVF783)]_[Aeromonas_hydrophila_subsp._hydrophila_ATCC_7966]	Aeromonas_hydrophila_subsp._hydrophila_ATCC_7966]	tppB	0	0	2	0	0	0	0	0	0	0	0	0	0	0	0	0	0	0	0	0	0	0	0	0	0	0	0	0	0	0	0	0	0	0	0	0	0	0	0	0	0	0	0	0	0	0	0
VFG044036(gi:1710110)_(AAC44637)_hemolysin_[aerolysin_(TX451)]_[Aeromonas_punctata]	Aeromonas_punctata]	AAC44637	0	0	2	0	0	0	0	0	0	0	0	0	0	0	0	0	0	0	0	0	0	0	0	0	0	0	0	0	0	0	0	0	0	0	0	0	0	0	0	0	0	0	0	0	0	0	0
VFG042217(gi:110290068)_(aopP)_putative_peptidase_C55_[T3SS_(SS031)]_[Aeromonas_salmonicida_str._As209]	Aeromonas_salmonicida_str._As209]	aopP	0	0	2	0	0	0	0	0	0	0	0	0	0	0	0	0	0	0	0	0	0	0	0	0	0	0	0	0	0	0	0	0	0	0	0	0	0	0	0	0	0	0	0	0	0	0	0
VFG038765(gi:4998971)_(flrA)_-_[Polar_flagella_(CVF786)]_[Aeromonas_salmonicida_subsp._salmonicida_A449]	Aeromonas_salmonicida_subsp._salmonicida_A449]	flrA	3	1	1	0	0	0	0	0	0	0	0	0	0	0	0	0	0	0	0	0	0	0	0	0	0	0	0	0	0	0	0	0	0	0	0	0	0	0	0	0	0	0	0	0	0	0	0
VFG038684(gi:145298360)_(flhA)_flagellar_biosynthesis_protein_FlhA_[Polar_flagella_(CVF786)]_[Aeromonas_salmonicida_subsp._salmonicida_A449]	Aeromonas_salmonicida_subsp._salmonicida_A449]	flhA	3	1	1	0	0	0	0	0	0	0	0	0	0	0	0	0	0	0	0	0	0	0	0	0	0	0	0	0	0	0	0	0	0	0	0	0	0	0	0	0	0	0	0	0	0	0	0
VFG038398(gi:145299406)_(vasH)_type_VI_secretion_system_sigma-54_dependent_transcriptional_regulator_[T6SS_(CVF782)]_[Aeromonas_salmonicida_subsp._salmonicida_A449]	Aeromonas_salmonicida_subsp._salmonicida_A449]	vasH	2	1	1	0	0	0	0	0	0	0	0	0	0	0	0	0	0	0	0	0	0	0	0	0	0	0	0	0	0	0	0	0	0	0	0	0	0	0	0	0	0	0	0	0	0	0	0
VFG038342(gb|YP_001144292)_(ascV)_Type_III_secretion_system_inner_membrane_export_apparatus_protein_AscV_[T3SS_(VF0479)]_[Aeromonas_salmonicida_subsp._salmonicida_A449]	Aeromonas_salmonicida_subsp._salmonicida_A449]	ascV	15	0	2	0	0	0	0	0	0	0	0	0	0	0	0	0	0	0	0	0	0	0	0	0	0	0	0	0	0	0	0	0	0	0	0	0	0	0	0	0	0	0	0	0	0	0	0
VFG038356(gi:4999254)_(aopX)_-_[T3SS_(VF0479)]_[Aeromonas_salmonicida_subsp._salmonicida_A449]	Aeromonas_salmonicida_subsp._salmonicida_A449]	aopX	7	0	2	0	0	0	0	0	0	0	0	0	0	0	0	0	0	0	0	0	0	0	0	0	0	0	0	0	0	0	0	0	0	0	0	0	0	0	0	0	0	0	0	0	0	0	0
VFG038332(gb|YP_001144282)_(exsA)_Type_III_secretion_system_transcriptional_regulator_[T3SS_(VF0479)]_[Aeromonas_salmonicida_subsp._salmonicida_A449]	Aeromonas_salmonicida_subsp._salmonicida_A449]	exsA	7	0	2	0	0	0	0	0	0	0	0	0	0	0	0	0	0	0	0	0	0	0	0	0	0	0	0	0	0	0	0	0	0	0	0	0	0	0	0	0	0	0	0	0	0	0	0
VFG038329(gb|YP_001144279)_(ascC)_Type_III_secretion_system_OM_ring_protein_AscC_[T3SS_(VF0479)]_[Aeromonas_salmonicida_subsp._salmonicida_A449]	Aeromonas_salmonicida_subsp._salmonicida_A449]	ascC	6	0	2	0	0	0	0	0	0	0	0	0	0	0	0	0	0	0	0	0	0	0	0	0	0	0	0	0	0	0	0	0	0	0	0	0	0	0	0	0	0	0	0	0	0	0	0
VFG038348(gb|YP_001144298)_(ascN)_Type_III_secretion_system_ATPase_[T3SS_(VF0479)]_[Aeromonas_salmonicida_subsp._salmonicida_A449]	Aeromonas_salmonicida_subsp._salmonicida_A449]	ascN	6	0	2	0	0	0	0	0	0	0	0	0	0	0	0	0	0	0	0	0	0	0	0	0	0	0	0	0	0	0	0	0	0	0	0	0	0	0	0	0	0	0	0	0	0	0	0
VFG038328(gb|YP_001144278)_(ascD)_Type_III_secretion_system_OM_ring_protein_AscD_[T3SS_(VF0479)]_[Aeromonas_salmonicida_subsp._salmonicida_A449]	Aeromonas_salmonicida_subsp._salmonicida_A449]	ascD	5	0	2	0	0	0	0	0	0	0	0	0	0	0	0	0	0	0	0	0	0	0	0	0	0	0	0	0	0	0	0	0	0	0	0	0	0	0	0	0	0	0	0	0	0	0	0
VFG038489(gi:145297762)_(tapY1)_type_IV_pilin_biogenesis_protein_[Tap_pili_(AI103)]_[Aeromonas_salmonicida_subsp._salmonicida_A449]	Aeromonas_salmonicida_subsp._salmonicida_A449]	tapY1	4	0	2	0	0	0	0	0	0	0	0	0	0	0	0	0	0	0	0	0	0	0	0	0	0	0	0	0	0	0	0	0	0	0	0	0	0	0	0	0	0	0	0	0	0	0	0
VFG038331(gb|YP_001144281)_(exsD)_Type_III_secretion_system_protein_ExsD_[T3SS_(VF0479)]_[Aeromonas_salmonicida_subsp._salmonicida_A449]	Aeromonas_salmonicida_subsp._salmonicida_A449]	exsD	4	0	2	0	0	0	0	0	0	0	0	0	0	0	0	0	0	0	0	0	0	0	0	0	0	0	0	0	0	0	0	0	0	0	0	0	0	0	0	0	0	0	0	0	0	0	0
VFG038352(gb|YP_001144302)_(ascR)_Type_III_secretion_system_inner_membrane_export_apparatus_protein_AscR_[T3SS_(VF0479)]_[Aeromonas_salmonicida_subsp._salmonicida_A449]	Aeromonas_salmonicida_subsp._salmonicida_A449]	ascR	4	0	2	0	0	0	0	0	0	0	0	0	0	0	0	0	0	0	0	0	0	0	0	0	0	0	0	0	0	0	0	0	0	0	0	0	0	0	0	0	0	0	0	0	0	0	0
VFG038562(gi:145300797)_(mshQ)_MSHA_biogenesis_protein_MshQ_[Mannose-sensitive_hemagglutinin_(Msh)_pilus,_type_IV_pili_(CVF785)]_[Aeromonas_salmonicida_subsp._salmonicida_A449]	Aeromonas_salmonicida_subsp._salmonicida_A449]	mshQ	3	0	2	0	0	0	0	0	0	0	0	0	0	0	0	0	0	0	0	0	0	0	0	0	0	0	0	0	0	0	0	0	0	0	0	0	0	0	0	0	0	0	0	0	0	0	0
VFG038347(gb|YP_001144297)_(aopN)_AopN,_secretion_control_of_translocators_and_immune_suppressor_[T3SS_(VF0479)]_[Aeromonas_salmonicida_subsp._salmonicida_A449]	Aeromonas_salmonicida_subsp._salmonicida_A449]	aopN	3	0	2	0	0	0	0	0	0	0	0	0	0	0	0	0	0	0	0	0	0	0	0	0	0	0	0	0	0	0	0	0	0	0	0	0	0	0	0	0	0	0	0	0	0	0	0
VFG038565(gi:145300798)_(mshP)_MSHA_biogenesis_protein_MshP_[Mannose-sensitive_hemagglutinin_(Msh)_pilus,_type_IV_pili_(CVF785)]_[Aeromonas_salmonicida_subsp._salmonicida_A449]	Aeromonas_salmonicida_subsp._salmonicida_A449]	mshP	3	0	2	0	0	0	0	0	0	0	0	0	0	0	0	0	0	0	0	0	0	0	0	0	0	0	0	0	0	0	0	0	0	0	0	0	0	0	0	0	0	0	0	0	0	0	0
VFG038324(gb|YP_001144274)_(ascH)_Type_III_secretion_system_protein_AscH,_regulator_needle_assembling_[T3SS_(VF0479)]_[Aeromonas_salmonicida_subsp._salmonicida_A449]	Aeromonas_salmonicida_subsp._salmonicida_A449]	ascH	3	0	2	0	0	0	0	0	0	0	0	0	0	0	0	0	0	0	0	0	0	0	0	0	0	0	0	0	0	0	0	0	0	0	0	0	0	0	0	0	0	0	0	0	0	0	0
VFG038355(gb|YP_001144305)_(ascU)_Type_III_secretion_system_inner_membrane_export_apparatus_protein_AscU_[T3SS_(VF0479)]_[Aeromonas_salmonicida_subsp._salmonicida_A449]	Aeromonas_salmonicida_subsp._salmonicida_A449]	ascU	3	0	2	0	0	0	0	0	0	0	0	0	0	0	0	0	0	0	0	0	0	0	0	0	0	0	0	0	0	0	0	0	0	0	0	0	0	0	0	0	0	0	0	0	0	0	0
VFG038364(gb|YP_001143938)_(aexT)_Type_III_secretion_system_effector_AexT,_bifunctional_toxin_with_GTPase_and_ADPribosylase_activity_[T3SS_(VF0479)]_[Aeromonas_salmonicida_subsp._salmonicida_A449]	Aeromonas_salmonicida_subsp._salmonicida_A449]	aexT	3	0	2	0	0	0	0	0	0	0	0	0	0	0	0	0	0	0	0	0	0	0	0	0	0	0	0	0	0	0	0	0	0	0	0	0	0	0	0	0	0	0	0	0	0	0	0
VFG038343(gb|YP_001144293)_(ascY)_chaperone_protein_[T3SS_(VF0479)]_[Aeromonas_salmonicida_subsp._salmonicida_A449]	Aeromonas_salmonicida_subsp._salmonicida_A449]	ascY	3	0	2	0	0	0	0	0	0	0	0	0	0	0	0	0	0	0	0	0	0	0	0	0	0	0	0	0	0	0	0	0	0	0	0	0	0	0	0	0	0	0	0	0	0	0	0
VFG038357(gi:145301467)_(sycX)_hypothetical_protein_[T3SS_(VF0479)]_[Aeromonas_salmonicida_subsp._salmonicida_A449]	Aeromonas_salmonicida_subsp._salmonicida_A449]	sycX	3	0	2	0	0	0	0	0	0	0	0	0	0	0	0	0	0	0	0	0	0	0	0	0	0	0	0	0	0	0	0	0	0	0	0	0	0	0	0	0	0	0	0	0	0	0	0
VFG038353(gb|YP_001144303)_(ascS)_type_III_secretion_system_inner_membrane_export_apparatus_protein_AscS_[T3SS_(VF0479)]_[Aeromonas_salmonicida_subsp._salmonicida_A449]	Aeromonas_salmonicida_subsp._salmonicida_A449]	ascS	3	0	2	0	0	0	0	0	0	0	0	0	0	0	0	0	0	0	0	0	0	0	0	0	0	0	0	0	0	0	0	0	0	0	0	0	0	0	0	0	0	0	0	0	0	0	0
VFG038392(gi:145299409)_(ASA_2463)_hypothetical_protein_[T6SS_(CVF782)]_[Aeromonas_salmonicida_subsp._salmonicida_A449]	Aeromonas_salmonicida_subsp._salmonicida_A449]	ASA_2463	2	0	2	0	0	0	0	0	0	0	0	0	0	0	0	0	0	0	0	0	0	0	0	0	0	0	0	0	0	0	0	0	0	0	0	0	0	0	0	0	0	0	0	0	0	0	0
VFG038351(gb|YP_001144301)_(ascQ)_type_III_secretion_system_protein_AscQ_[T3SS_(VF0479)]_[Aeromonas_salmonicida_subsp._salmonicida_A449]	Aeromonas_salmonicida_subsp._salmonicida_A449]	ascQ	2	0	2	0	0	0	0	0	0	0	0	0	0	0	0	0	0	0	0	0	0	0	0	0	0	0	0	0	0	0	0	0	0	0	0	0	0	0	0	0	0	0	0	0	0	0	0
VFG038354(gb|YP_001144304)_(ascT)_Type_III_secretion_system_inner_membrane_export_apparatus_protein_AscT_[T3SS_(VF0479)]_[Aeromonas_salmonicida_subsp._salmonicida_A449]	Aeromonas_salmonicida_subsp._salmonicida_A449]	ascT	2	0	2	0	0	0	0	0	0	0	0	0	0	0	0	0	0	0	0	0	0	0	0	0	0	0	0	0	0	0	0	0	0	0	0	0	0	0	0	0	0	0	0	0	0	0	0
VFG038338(gb|YP_001144288)_(acrH)_chaperon_protein_for_AopB/AopD_[T3SS_(VF0479)]_[Aeromonas_salmonicida_subsp._salmonicida_A449]	Aeromonas_salmonicida_subsp._salmonicida_A449]	acrH	2	0	2	0	0	0	0	0	0	0	0	0	0	0	0	0	0	0	0	0	0	0	0	0	0	0	0	0	0	0	0	0	0	0	0	0	0	0	0	0	0	0	0	0	0	0	0
VFG038323(gb|YP_001144273)_(ascI)_Type_III_secretion_system_inner_rod_protein_AscI_[T3SS_(VF0479)]_[Aeromonas_salmonicida_subsp._salmonicida_A449]	Aeromonas_salmonicida_subsp._salmonicida_A449]	ascI	2	0	2	0	0	0	0	0	0	0	0	0	0	0	0	0	0	0	0	0	0	0	0	0	0	0	0	0	0	0	0	0	0	0	0	0	0	0	0	0	0	0	0	0	0	0	0
VFG038333(gb|YP_001144283)_(exsB)_type_III_secretion_system_OM_ring_protein_ExsB_[T3SS_(VF0479)]_[Aeromonas_salmonicida_subsp._salmonicida_A449]	Aeromonas_salmonicida_subsp._salmonicida_A449]	exsB	1	0	2	0	0	0	0	0	0	0	0	0	0	0	0	0	0	0	0	0	0	0	0	0	0	0	0	0	0	0	0	0	0	0	0	0	0	0	0	0	0	0	0	0	0	0	0
VFG038278(gi:145300644)_(exeE)_general_secretion_pathway_protein_E_[T2SS_(CVF780)]_[Aeromonas_salmonicida_subsp._salmonicida_A449]	Aeromonas_salmonicida_subsp._salmonicida_A449]	exeE	1	0	2	0	0	0	0	0	0	0	0	0	0	0	0	0	0	0	0	0	0	0	0	0	0	0	0	0	0	0	0	0	0	0	0	0	0	0	0	0	0	0	0	0	0	0	0
VFG038877(gb|YP_001140298)_(lfgH)_lateral_flagellar_L-ring_protein,_LfgH_[Lateral_flagella_(VF0474)]_[Aeromonas_salmonicida_subsp._salmonicida_A449]	Aeromonas_salmonicida_subsp._salmonicida_A449]	lfgH	1	0	2	0	0	0	0	0	0	0	0	0	0	0	0	0	0	0	0	0	0	0	0	0	0	0	0	0	0	0	0	0	0	0	0	0	0	0	0	0	0	0	0	0	0	0	0
VFG038396(gi:145299407)_(clpB)_type_VI_secretion_system_clpB_chaperone_[T6SS_(CVF782)]_[Aeromonas_salmonicida_subsp._salmonicida_A449]	Aeromonas_salmonicida_subsp._salmonicida_A449]	clpB	1	0	2	0	0	0	0	0	0	0	0	0	0	0	0	0	0	0	0	0	0	0	0	0	0	0	0	0	0	0	0	0	0	0	0	0	0	0	0	0	0	0	0	0	0	0	0
VFG038902(gi:145298519)_(hlyA)_hemolysin_[Hemolysin,_HlyA_(CVF792)]_[Aeromonas_salmonicida_subsp._salmonicida_A449]	Aeromonas_salmonicida_subsp._salmonicida_A449]	hlyA	1	0	2	0	0	0	0	0	0	0	0	0	0	0	0	0	0	0	0	0	0	0	0	0	0	0	0	0	0	0	0	0	0	0	0	0	0	0	0	0	0	0	0	0	0	0	0
VFG038881(gb|YP_001140302)_(lfgL)_lateral_flagellar_hook-associated_protein,_LfgL_[Lateral_flagella_(VF0474)]_[Aeromonas_salmonicida_subsp._salmonicida_A449]	Aeromonas_salmonicida_subsp._salmonicida_A449]	lfgL	1	0	2	0	0	0	0	0	0	0	0	0	0	0	0	0	0	0	0	0	0	0	0	0	0	0	0	0	0	0	0	0	0	0	0	0	0	0	0	0	0	0	0	0	0	0	0
VFG038337(gb|YP_001144287)_(aopB)_Type_III_secretion_system_translocator_AopB_[T3SS_(VF0479)]_[Aeromonas_salmonicida_subsp._salmonicida_A449]	Aeromonas_salmonicida_subsp._salmonicida_A449]	aopB	1	0	2	0	0	0	0	0	0	0	0	0	0	0	0	0	0	0	0	0	0	0	0	0	0	0	0	0	0	0	0	0	0	0	0	0	0	0	0	0	0	0	0	0	0	0	0
VFG038349(gb|YP_001144299)_(ascO)_Type_III_secretion_system_protein_AscO_[T3SS_(VF0479)]_[Aeromonas_salmonicida_subsp._salmonicida_A449]	Aeromonas_salmonicida_subsp._salmonicida_A449]	ascO	1	0	2	0	0	0	0	0	0	0	0	0	0	0	0	0	0	0	0	0	0	0	0	0	0	0	0	0	0	0	0	0	0	0	0	0	0	0	0	0	0	0	0	0	0	0	0
VFG038336(gb|YP_001144286)_(aopD)_Type_III_secretion_system_translocator_AopD_[T3SS_(VF0479)]_[Aeromonas_salmonicida_subsp._salmonicida_A449]	Aeromonas_salmonicida_subsp._salmonicida_A449]	aopD	1	0	2	0	0	0	0	0	0	0	0	0	0	0	0	0	0	0	0	0	0	0	0	0	0	0	0	0	0	0	0	0	0	0	0	0	0	0	0	0	0	0	0	0	0	0	0
VFG038433(gi:145297499)_(tapB)_type_IV_pilus_assembly_protein_TapB_[Tap_pili_(AI103)]_[Aeromonas_salmonicida_subsp._salmonicida_A449]	Aeromonas_salmonicida_subsp._salmonicida_A449]	tapB	1	0	2	0	0	0	0	0	0	0	0	0	0	0	0	0	0	0	0	0	0	0	0	0	0	0	0	0	0	0	0	0	0	0	0	0	0	0	0	0	0	0	0	0	0	0	0
VFG038310(gi:145300652)_(exeM)_general_secretion_pathway_protein_M_[T2SS_(CVF780)]_[Aeromonas_salmonicida_subsp._salmonicida_A449]	Aeromonas_salmonicida_subsp._salmonicida_A449]	exeM	1	0	2	0	0	0	0	0	0	0	0	0	0	0	0	0	0	0	0	0	0	0	0	0	0	0	0	0	0	0	0	0	0	0	0	0	0	0	0	0	0	0	0	0	0	0	0
VFG038350(gb|YP_001144300)_(ascP)_Type_III_secretion_system_protein_AscP,_needle_length_control,_ruler_protein_[T3SS_(VF0479)]_[Aeromonas_salmonicida_subsp._salmonicida_A449]	Aeromonas_salmonicida_subsp._salmonicida_A449]	ascP	1	0	2	0	0	0	0	0	0	0	0	0	0	0	0	0	0	0	0	0	0	0	0	0	0	0	0	0	0	0	0	0	0	0	0	0	0	0	0	0	0	0	0	0	0	0	0
VFG038861(gb|YP_001140282)_(lfhA)_lateral_flagellar_biosynthesis_protein_[Lateral_flagella_(VF0474)]_[Aeromonas_salmonicida_subsp._salmonicida_A449]	Aeromonas_salmonicida_subsp._salmonicida_A449]	lfhA	1	0	2	0	0	0	0	0	0	0	0	0	0	0	0	0	0	0	0	0	0	0	0	0	0	0	0	0	0	0	0	0	0	0	0	0	0	0	0	0	0	0	0	0	0	0	0
VFG038320(gb|YP_001144270)_(ascL)_Type_III_secretion_system_C_ring_protein_AscL_[T3SS_(VF0479)]_[Aeromonas_salmonicida_subsp._salmonicida_A449]	Aeromonas_salmonicida_subsp._salmonicida_A449]	ascL	1	0	2	0	0	0	0	0	0	0	0	0	0	0	0	0	0	0	0	0	0	0	0	0	0	0	0	0	0	0	0	0	0	0	0	0	0	0	0	0	0	0	0	0	0	0	0
VFG038321(gb|YP_001144271)_(ascK)_Type_III_secretion_system_C_ring_protein_AscK_[T3SS_(VF0479)]_[Aeromonas_salmonicida_subsp._salmonicida_A449]	Aeromonas_salmonicida_subsp._salmonicida_A449]	ascK	1	0	2	0	0	0	0	0	0	0	0	0	0	0	0	0	0	0	0	0	0	0	0	0	0	0	0	0	0	0	0	0	0	0	0	0	0	0	0	0	0	0	0	0	0	0	0
VFG038344(gb|YP_001144294)_(ascX)_Unknown_function,_chaperoned_by_AscY_[T3SS_(VF0479)]_[Aeromonas_salmonicida_subsp._salmonicida_A449]	Aeromonas_salmonicida_subsp._salmonicida_A449]	ascX	1	0	2	0	0	0	0	0	0	0	0	0	0	0	0	0	0	0	0	0	0	0	0	0	0	0	0	0	0	0	0	0	0	0	0	0	0	0	0	0	0	0	0	0	0	0	0
VFG038461(gi:145298152)_(tapQ)_type_IV_pilus_biogenesis_protein_TapQ_[Tap_pili_(AI103)]_[Aeromonas_salmonicida_subsp._salmonicida_A449]	Aeromonas_salmonicida_subsp._salmonicida_A449]	tapQ	1	0	2	0	0	0	0	0	0	0	0	0	0	0	0	0	0	0	0	0	0	0	0	0	0	0	0	0	0	0	0	0	0	0	0	0	0	0	0	0	0	0	0	0	0	0	0
VFG038889(gb|YP_001140313)_(lafT)_LafT,_flagella_motor_stator_protein_[Lateral_flagella_(VF0474)]_[Aeromonas_salmonicida_subsp._salmonicida_A449]	Aeromonas_salmonicida_subsp._salmonicida_A449]	lafT	1	0	2	0	0	0	0	0	0	0	0	0	0	0	0	0	0	0	0	0	0	0	0	0	0	0	0	0	0	0	0	0	0	0	0	0	0	0	0	0	0	0	0	0	0	0	0
VFG038341(gb|YP_001144291)_(acrR)_Type_III_secretion_system_regulator,_LcrR-like_[T3SS_(VF0479)]_[Aeromonas_salmonicida_subsp._salmonicida_A449]	Aeromonas_salmonicida_subsp._salmonicida_A449]	acrR	1	0	2	0	0	0	0	0	0	0	0	0	0	0	0	0	0	0	0	0	0	0	0	0	0	0	0	0	0	0	0	0	0	0	0	0	0	0	0	0	0	0	0	0	0	0	0
VFG038757(gi:145298504)_(flrC)_two-component_system_flagellar_response_regulator_FlrC_[Polar_flagella_(CVF786)]_[Aeromonas_salmonicida_subsp._salmonicida_A449]	Aeromonas_salmonicida_subsp._salmonicida_A449]	flrC	1	0	2	0	0	0	0	0	0	0	0	0	0	0	0	0	0	0	0	0	0	0	0	0	0	1	0	0	0	0	0	0	0	0	0	0	0	0	0	0	0	0	0	0	0	0	0
VFG044250(gi:145300223)_(hutD)_ABC-type_hemin_transporter,_ATP-binding_protein_[direct_heme_uptake_system_(IA062)]_[Aeromonas_salmonicida_subsp._salmonicida_A449]	Aeromonas_salmonicida_subsp._salmonicida_A449]	hutD	1	0	2	0	0	0	0	0	0	0	0	0	0	0	0	0	0	0	0	0	0	0	0	0	0	0	0	0	0	0	0	0	0	0	0	0	0	0	0	0	0	0	0	0	0	0	0
VFG038346(gb|YP_001144296)_(acr1)_Type_III_secretion_system_gatekeeper_subunit__[T3SS_(VF0479)]_[Aeromonas_salmonicida_subsp._salmonicida_A449]	Aeromonas_salmonicida_subsp._salmonicida_A449]	acr1	1	0	2	0	0	0	0	0	0	0	0	0	0	0	0	0	0	0	0	0	0	0	0	0	0	0	0	0	0	0	0	0	0	0	0	0	0	0	0	0	0	0	0	0	0	0	0
VFG038382(gi:145299414)_(ASA_2468)_hypothetical_protein_[T6SS_(CVF782)]_[Aeromonas_salmonicida_subsp._salmonicida_A449]	Aeromonas_salmonicida_subsp._salmonicida_A449]	ASA_2468	1	0	2	0	0	0	0	0	0	0	0	0	0	0	0	0	0	0	0	0	0	0	0	0	0	0	0	0	0	0	0	0	0	0	0	0	0	0	0	0	0	0	0	0	0	0	0
VFG038340(gb|YP_001144290)_(acrG)_Type_III_secretion_system_protein,_LcrG-like_[T3SS_(VF0479)]_[Aeromonas_salmonicida_subsp._salmonicida_A449]	Aeromonas_salmonicida_subsp._salmonicida_A449]	acrG	1	0	2	0	0	0	0	0	0	0	0	0	0	0	0	0	0	0	0	0	0	0	0	0	0	0	0	0	0	0	0	0	0	0	0	0	0	0	0	0	0	0	0	0	0	0	0
VFG038335(gb|YP_001144285)_(exsC)_chaperone_protein_[T3SS_(VF0479)]_[Aeromonas_salmonicida_subsp._salmonicida_A449]	Aeromonas_salmonicida_subsp._salmonicida_A449]	exsC	0	0	2	0	0	0	0	0	0	0	0	0	0	0	0	0	0	0	0	0	0	0	0	0	0	0	0	0	0	0	0	0	0	0	0	0	0	0	0	0	0	0	0	0	0	0	0
VFG038274(gi:145300643)_(exeD)_general_secretion_pathway_protein_D_[T2SS_(CVF780)]_[Aeromonas_salmonicida_subsp._salmonicida_A449]	Aeromonas_salmonicida_subsp._salmonicida_A449]	exeD	0	0	2	0	0	0	0	0	0	0	0	0	0	0	0	0	0	0	0	0	0	0	0	0	0	0	0	0	0	0	0	0	0	0	0	0	0	0	0	0	0	0	0	0	0	0	0
VFG038270(gi:145300642)_(exeC)_general_secretion_pathway_protein_C_[T2SS_(CVF780)]_[Aeromonas_salmonicida_subsp._salmonicida_A449]	Aeromonas_salmonicida_subsp._salmonicida_A449]	exeC	0	0	2	0	0	0	0	0	0	0	0	0	0	0	0	0	0	0	0	0	0	0	0	0	0	0	0	0	0	0	0	0	0	0	0	0	0	0	0	0	0	0	0	0	0	0	0
VFG038485(gb|YP_001140602)_(tppD)_type_IV_pilus_pseudopilin_[Tap_type_IV_pili_(CVF783)]_[Aeromonas_salmonicida_subsp._salmonicida_A449]	Aeromonas_salmonicida_subsp._salmonicida_A449]	tppD	0	0	2	0	0	0	0	0	0	0	0	0	0	0	0	0	0	0	0	0	0	0	0	0	0	0	0	0	0	0	0	0	0	0	0	0	0	0	0	0	0	0	0	0	0	0	0
VFG038773(gi:145298497)_(flgK)_flagellar_hook-associated_protein_FlgK_[Polar_flagella_(CVF786)]_[Aeromonas_salmonicida_subsp._salmonicida_A449]	Aeromonas_salmonicida_subsp._salmonicida_A449]	flgK	0	0	2	0	0	0	0	0	0	0	0	0	0	0	0	0	0	0	0	0	0	0	0	0	0	0	0	0	0	0	0	0	0	0	0	0	0	0	0	0	0	0	0	0	0	0	0
VFG038363(gb|YP_001144318)_(aopO)_Type_III_secretion_system_effector_AopO,_putative_serine/threonine_kinase_[T3SS_(VF0479)]_[Aeromonas_salmonicida_subsp._salmonicida_A449]	Aeromonas_salmonicida_subsp._salmonicida_A449]	aopO	0	0	2	0	0	0	0	0	0	0	0	0	0	0	0	0	0	0	0	0	0	0	0	0	0	0	0	0	0	0	0	0	0	0	0	0	0	0	0	0	0	0	0	0	0	0	0
VFG038878(gb|YP_001140299)_(flgI)_flagellar_basal_body_P-ring_protein_[Lateral_flagella_(VF0474)]_[Aeromonas_salmonicida_subsp._salmonicida_A449]	Aeromonas_salmonicida_subsp._salmonicida_A449]	flgI	0	0	2	0	0	0	0	0	0	0	0	0	0	0	0	0	0	0	0	0	0	0	0	0	0	0	0	0	0	0	0	0	0	0	0	0	0	0	0	0	0	0	0	0	0	0	0
VFG038359(gb|YP_001144233)_(aopH)_Type_III_secretion_system_effector_AopH,_putative_tyrosine_phosphatase_[T3SS_(VF0479)]_[Aeromonas_salmonicida_subsp._salmonicida_A449]	Aeromonas_salmonicida_subsp._salmonicida_A449]	aopH	0	0	2	0	0	0	0	0	0	0	0	0	0	0	0	0	0	0	0	0	0	0	0	0	0	0	0	0	0	0	0	0	0	0	0	0	0	0	0	0	0	0	0	0	0	0	0
VFG038883(gb|YP_001140307)_(lafB)_flagellar_hook_associated_protein_LafB_[Lateral_flagella_(VF0474)]_[Aeromonas_salmonicida_subsp._salmonicida_A449]	Aeromonas_salmonicida_subsp._salmonicida_A449]	lafB	0	0	2	0	0	0	0	0	0	0	0	0	0	0	0	0	0	0	0	0	0	0	0	0	0	0	0	0	0	0	0	0	0	0	0	0	0	0	0	0	0	0	0	0	0	0	0
VFG042801(gi:145300516)_(tapZ)_type_IV_pilus_assembly_TapZ_[Tap_pili_(AI103)]_[Aeromonas_salmonicida_subsp._salmonicida_A449]	Aeromonas_salmonicida_subsp._salmonicida_A449]	tapZ	0	0	2	0	0	0	0	0	0	0	0	0	0	0	0	0	0	0	0	0	0	0	0	0	0	0	0	0	0	0	0	0	0	0	0	0	0	0	0	0	0	0	0	0	0	0	0
VFG038910(gi:145298125)_(ASA_1096)_hypothetical_protein_[Thermostable_hemolysin_(TH)_(CVF794)]_[Aeromonas_salmonicida_subsp._salmonicida_A449]	Aeromonas_salmonicida_subsp._salmonicida_A449]	ASA_1096	0	0	2	0	0	0	0	0	0	0	0	0	0	0	0	0	0	0	0	0	0	0	0	0	0	0	0	0	0	0	0	0	0	0	0	0	0	0	0	0	0	0	0	0	0	0	0
VFG038534(gi:145299825)_(flpF)_flp_pilus_assembly_protein_FlpF_[Flp_type_IV_pili_(CVF784)]_[Aeromonas_salmonicida_subsp._salmonicida_A449]	Aeromonas_salmonicida_subsp._salmonicida_A449]	flpF	0	0	2	0	0	0	0	0	0	0	0	0	0	0	0	0	0	0	0	0	0	0	0	0	0	0	0	0	0	0	0	0	0	0	0	0	0	0	0	0	0	0	0	0	0	0	0
VFG044242(gi:145300215)_(hutA)_outer-membrane_heme_receptor_[direct_heme_uptake_system_(IA062)]_[Aeromonas_salmonicida_subsp._salmonicida_A449]	Aeromonas_salmonicida_subsp._salmonicida_A449]	hutA	0	0	2	0	0	0	0	0	0	0	0	0	0	0	0	0	0	0	0	0	0	0	0	0	0	0	0	0	0	0	0	0	0	0	0	0	0	0	0	0	0	0	0	0	0	0	0
VFG038672(gi:145298357)_(fliQ)_flagellar_biosynthetic_protein_FliQ_[Polar_flagella_(CVF786)]_[Aeromonas_salmonicida_subsp._salmonicida_A449]	Aeromonas_salmonicida_subsp._salmonicida_A449]	fliQ	0	0	2	0	0	0	0	0	0	0	0	0	0	0	0	0	0	0	0	0	0	0	0	0	0	0	0	0	0	0	0	0	0	0	0	0	0	0	0	0	0	0	0	0	0	0	0
VFG038597(gi:145300801)_(mshM)_MSHA_biogenesis_protein_MshM_[Mannose-sensitive_hemagglutinin_(Msh)_pilus,_type_IV_pili_(CVF785)]_[Aeromonas_salmonicida_subsp._salmonicida_A449]	Aeromonas_salmonicida_subsp._salmonicida_A449]	mshM	0	0	2	0	0	0	0	0	0	0	0	0	0	0	0	0	0	0	0	0	0	0	0	0	0	0	0	0	0	0	0	0	0	0	0	0	0	0	0	0	0	0	0	0	0	0	0
VFG038858(gb|YP_001140279)_(lfiQ)_lateral_flagellar_biosynthetic_protein,_LfiQ_[Lateral_flagella_(VF0474)]_[Aeromonas_salmonicida_subsp._salmonicida_A449]	Aeromonas_salmonicida_subsp._salmonicida_A449]	lfiQ	0	0	2	0	0	0	0	0	0	0	0	0	0	0	0	0	0	0	0	0	0	0	0	0	0	0	0	0	0	0	0	0	0	0	0	0	0	0	0	0	0	0	0	0	0	0	0
VFG038708(gi:145298366)_(cheA-2)_two-component_system_chemotaxis_sensor_histidine_kinase_CheA_[Polar_flagella_(CVF786)]_[Aeromonas_salmonicida_subsp._salmonicida_A449]	Aeromonas_salmonicida_subsp._salmonicida_A449]	cheA-2	0	0	2	0	0	0	0	0	0	0	0	0	0	0	0	0	0	0	0	0	0	0	0	0	0	0	0	0	0	0	0	0	0	0	0	0	0	0	0	0	0	0	0	0	0	0	0
VFG038445(gi:145298148)_(tapM)_type_IV_pilus_biogenesis_protein_tapM_[Tap_pili_(AI103)]_[Aeromonas_salmonicida_subsp._salmonicida_A449]	Aeromonas_salmonicida_subsp._salmonicida_A449]	tapM	0	0	2	0	0	0	0	0	0	0	0	0	0	0	0	0	0	0	0	0	0	0	0	0	0	0	0	0	0	0	0	0	0	0	0	0	0	0	0	0	0	0	0	0	0	0	0
VFG038748(gi:145299586)_(flaJ)_flagellar_protein_FliS_[Polar_flagella_(CVF786)]_[Aeromonas_salmonicida_subsp._salmonicida_A449]	Aeromonas_salmonicida_subsp._salmonicida_A449]	flaJ	0	0	2	0	0	0	0	0	0	0	0	0	0	0	0	0	0	0	0	0	0	0	0	0	0	0	0	0	0	0	0	0	0	0	0	0	0	0	0	0	0	0	0	0	0	0	0
VFG038846(gi:145297255)_(nueA)_CMP-N-acetylneuraminic_acid_synthetase_[Polar_flagella_(CVF786)]_[Aeromonas_salmonicida_subsp._salmonicida_A449]	Aeromonas_salmonicida_subsp._salmonicida_A449]	nueA	0	0	2	0	0	0	0	0	0	0	0	0	0	0	0	0	0	0	0	0	0	0	0	0	0	0	0	0	0	0	0	0	0	0	0	0	0	0	0	0	0	0	0	0	0	0	0
VFG038882(gb|YP_001140303)_(maf-5)_modification_accessory_factor_[Lateral_flagella_(VF0474)]_[Aeromonas_salmonicida_subsp._salmonicida_A449]	Aeromonas_salmonicida_subsp._salmonicida_A449]	maf-5	0	0	2	0	0	0	0	0	0	0	0	0	0	0	0	0	0	0	0	0	0	0	0	0	0	0	0	0	0	0	0	0	0	0	0	0	0	0	0	0	0	0	0	0	0	0	0
VFG038388(gi:145299411)_(ASA_2465)_hypothetical_protein_[T6SS_(CVF782)]_[Aeromonas_salmonicida_subsp._salmonicida_A449]	Aeromonas_salmonicida_subsp._salmonicida_A449]	ASA_2465	0	0	2	0	0	0	0	0	0	0	0	0	0	0	0	0	0	0	0	0	0	0	0	0	0	0	0	0	0	0	0	0	0	0	0	0	0	0	0	0	0	0	0	0	0	0	0
VFG038298(gi:145300649)_(exeJ)_general_secretion_pathway_protein_J_[T2SS_(CVF780)]_[Aeromonas_salmonicida_subsp._salmonicida_A449]	Aeromonas_salmonicida_subsp._salmonicida_A449]	exeJ	0	0	2	0	0	0	0	0	0	0	0	0	0	0	0	0	0	0	0	0	0	0	0	0	0	0	0	0	0	0	0	0	0	0	0	0	0	0	0	0	0	0	0	0	0	0	0
VFG038502(gi:145299468)_(tapV)_type_IV_pilus_assembly_protein_TapV_[Tap_pili_(AI103)]_[Aeromonas_salmonicida_subsp._salmonicida_A449]	Aeromonas_salmonicida_subsp._salmonicida_A449]	tapV	0	0	2	0	0	0	0	0	0	0	0	0	0	0	0	0	0	0	0	0	0	0	0	0	0	0	0	0	0	0	0	0	0	0	0	0	0	0	0	0	0	0	0	0	0	0	0
VFG038481(gi:145297759)_(tppB)_type_IV_pilus_assembly_protein_[Tap_type_IV_pili_(CVF783)]_[Aeromonas_salmonicida_subsp._salmonicida_A449]	Aeromonas_salmonicida_subsp._salmonicida_A449]	tppB	0	0	2	0	0	0	0	0	0	0	0	0	0	0	0	0	0	0	0	0	0	0	0	0	0	0	0	0	0	0	0	0	0	0	0	0	0	0	0	0	0	0	0	0	0	0	0
VFG038797(gi:145298491)_(flgE)_flagellar_hook_protein_FlgE_[Polar_flagella_(CVF786)]_[Aeromonas_salmonicida_subsp._salmonicida_A449]	Aeromonas_salmonicida_subsp._salmonicida_A449]	flgE	0	0	2	0	0	0	0	0	0	0	0	0	0	0	0	0	0	0	0	0	0	0	0	0	0	0	0	0	0	0	0	0	0	0	0	0	0	0	0	0	0	0	0	0	0	0	0
VFG038414(gi:145300595)_(fimC)_type_I_pilus_usher_protein_FimC_[Type_I_fimbriae_(CVF796)]_[Aeromonas_salmonicida_subsp._salmonicida_A449]	Aeromonas_salmonicida_subsp._salmonicida_A449]	fimC	0	0	2	0	0	0	0	0	0	0	0	0	0	0	0	0	0	0	0	0	0	0	0	0	0	0	0	0	0	0	0	0	0	0	0	0	0	0	0	0	0	0	0	0	0	0	0
VFG038874(gb|YP_001140295)_(flgE)_flagellar_hook_protein_FlgE_[Lateral_flagella_(VF0474)]_[Aeromonas_salmonicida_subsp._salmonicida_A449]	Aeromonas_salmonicida_subsp._salmonicida_A449]	flgE	0	0	2	0	0	0	0	0	0	0	0	0	0	0	0	0	0	0	0	0	0	0	0	0	0	0	0	0	0	0	0	0	0	0	0	0	0	0	0	0	0	0	0	0	0	0	0
VFG038306(gi:145300651)_(exeL)_general_secretion_pathway_protein_L_[T2SS_(CVF780)]_[Aeromonas_salmonicida_subsp._salmonicida_A449]	Aeromonas_salmonicida_subsp._salmonicida_A449]	exeL	0	0	2	0	0	0	0	0	0	0	0	0	0	0	0	0	0	0	0	0	0	0	0	0	0	0	0	0	0	0	0	0	0	0	0	0	0	0	0	0	0	0	0	0	0	0	0
VFG038688(gi:145298361)_(flhF)_flagellar_biosynthesis_protein_FlhF_[Polar_flagella_(CVF786)]_[Aeromonas_salmonicida_subsp._salmonicida_A449]	Aeromonas_salmonicida_subsp._salmonicida_A449]	flhF	0	0	2	0	0	0	0	0	0	0	0	0	0	0	0	0	0	0	0	0	0	0	0	0	0	0	0	0	0	0	0	0	0	0	0	0	0	0	0	0	0	0	0	0	0	0	0
VFG038789(gi:145298493)_(flgG)_flagellar_basal_body_rod_protein_FlgG_[Polar_flagella_(CVF786)]_[Aeromonas_salmonicida_subsp._salmonicida_A449]	Aeromonas_salmonicida_subsp._salmonicida_A449]	flgG	0	0	2	0	0	0	0	0	0	0	0	0	0	0	0	0	0	0	0	0	0	0	0	0	0	0	0	0	0	0	0	0	0	0	0	0	0	0	0	0	0	0	0	0	0	0	0
VFG038864(gb|YP_001140285)_(fliF)_flagellar_MS-ring_protein_[Lateral_flagella_(VF0474)]_[Aeromonas_salmonicida_subsp._salmonicida_A449]	Aeromonas_salmonicida_subsp._salmonicida_A449]	fliF	0	0	2	0	0	0	0	0	0	0	0	0	0	0	0	0	0	0	0	0	0	0	0	0	0	0	0	0	0	0	0	0	0	0	0	0	0	0	0	0	0	0	0	0	0	0	0
VFG038616(gi:145300806)_(mshI)_MSHA_biogenesis_protein_MshI_[Mannose-sensitive_hemagglutinin_(Msh)_pilus,_type_IV_pili_(CVF785)]_[Aeromonas_salmonicida_subsp._salmonicida_A449]	Aeromonas_salmonicida_subsp._salmonicida_A449]	mshI	0	0	2	0	0	0	0	0	0	0	0	0	0	0	0	0	0	0	0	0	0	0	0	0	0	0	0	0	0	0	0	0	0	0	0	0	0	0	0	0	0	0	0	0	0	0	0
VFG038801(gi:145298490)_(flgD)_flagellar_hook_capping_protein_FlgD_[Polar_flagella_(CVF786)]_[Aeromonas_salmonicida_subsp._salmonicida_A449]	Aeromonas_salmonicida_subsp._salmonicida_A449]	flgD	0	0	2	0	0	0	0	0	0	0	0	0	0	0	0	0	0	0	0	0	0	0	0	0	0	0	0	0	0	0	0	0	0	0	0	0	0	0	0	0	0	0	0	0	0	0	0
VFG038876(gb|YP_001140297)_(lfgG)_lateral_flagellar_basal-body_rod_protein_LfgG_[Lateral_flagella_(VF0474)]_[Aeromonas_salmonicida_subsp._salmonicida_A449]	Aeromonas_salmonicida_subsp._salmonicida_A449]	lfgG	0	0	2	0	0	0	0	0	0	0	0	0	0	0	0	0	0	0	0	0	0	0	0	0	0	0	0	0	0	0	0	0	0	0	0	0	0	0	0	0	0	0	0	0	0	0	0
VFG038664(gi:145298355)_(fliO)_flagellar_protein_FliO_[Polar_flagella_(CVF786)]_[Aeromonas_salmonicida_subsp._salmonicida_A449]	Aeromonas_salmonicida_subsp._salmonicida_A449]	fliO	0	0	2	0	0	0	0	0	0	0	0	0	0	0	0	0	0	0	0	0	0	0	0	0	0	0	0	0	0	0	0	0	0	0	0	0	0	0	0	0	0	0	0	0	0	0	0
VFG038899(gi:145299774)_(ahh1)_aerolysin_B_[Extracellular_hemolysin,_AHH1_(CVF791)]_[Aeromonas_salmonicida_subsp._salmonicida_A449]	Aeromonas_salmonicida_subsp._salmonicida_A449]	ahh1	0	0	2	0	0	0	0	0	0	0	0	0	0	0	0	0	0	0	0	0	0	0	0	0	0	0	0	0	0	0	0	0	0	0	0	0	0	0	0	0	0	0	0	0	0	0	0
VFG038871(gb|YP_001140292)_(lfgA)_lateral_flagellar_basal_body_P-ring_biosynthesis_protein,_LfgA_[Lateral_flagella_(VF0474)]_[Aeromonas_salmonicida_subsp._salmonicida_A449]	Aeromonas_salmonicida_subsp._salmonicida_A449]	lfgA	0	0	2	0	0	0	0	0	0	0	0	0	0	0	0	0	0	0	0	0	0	0	0	0	0	0	0	0	0	0	0	0	0	0	0	0	0	0	0	0	0	0	0	0	0	0	0
VFG038377(gi:145297534)_(ASA_0454)_lipoprotein_[T6SS_(CVF782)]_[Aeromonas_salmonicida_subsp._salmonicida_A449]	Aeromonas_salmonicida_subsp._salmonicida_A449]	ASA_0454	0	0	2	0	0	0	0	0	0	0	0	0	0	0	0	0	0	0	0	0	0	0	0	0	0	0	0	0	0	0	0	0	0	0	0	0	0	0	0	0	0	0	0	0	0	0	0
VFG038437(gi:4996430)_(tagC)_-_[Tap_pili_(AI103)]_[Aeromonas_salmonicida_subsp._salmonicida_A449]	Aeromonas_salmonicida_subsp._salmonicida_A449]	tagC	0	0	2	0	0	0	0	0	0	0	0	0	0	0	0	0	0	0	0	0	0	0	0	0	0	0	0	0	0	0	0	0	0	0	0	0	0	0	0	0	0	0	0	0	0	0	0
VFG038546(gi:145299828)_(flpC)_flp_pilus_assembly_protein_FlpC_[Flp_type_IV_pili_(CVF784)]_[Aeromonas_salmonicida_subsp._salmonicida_A449]	Aeromonas_salmonicida_subsp._salmonicida_A449]	flpC	0	0	2	0	0	0	0	0	0	0	0	0	0	0	0	0	0	0	0	0	0	0	0	0	0	0	0	0	0	0	0	0	0	0	0	0	0	0	0	0	0	0	0	0	0	0	0
VFG038538(gi:145299826)_(flpE)_flp_pilus_assembly_protein_FlpE_[Flp_type_IV_pili_(CVF784)]_[Aeromonas_salmonicida_subsp._salmonicida_A449]	Aeromonas_salmonicida_subsp._salmonicida_A449]	flpE	0	0	2	0	0	0	0	0	0	0	0	0	0	0	0	0	0	0	0	0	0	0	0	0	0	0	0	0	0	0	0	0	0	0	0	0	0	0	0	0	0	0	0	0	0	0	0
VFG038453(gi:145298150)_(tapO)_type_IV_pilus_biogenesis_protein_tapO_[Tap_pili_(AI103)]_[Aeromonas_salmonicida_subsp._salmonicida_A449]	Aeromonas_salmonicida_subsp._salmonicida_A449]	tapO	0	0	2	0	0	0	0	0	0	0	0	0	0	0	0	0	0	0	0	0	0	0	0	0	0	0	0	0	0	0	0	0	0	0	0	0	0	0	0	0	0	0	0	0	0	0	0
VFG038852(gi:145297253)_(nueB)_sialic_acid_synthase_[Polar_flagella_(CVF786)]_[Aeromonas_salmonicida_subsp._salmonicida_A449]	Aeromonas_salmonicida_subsp._salmonicida_A449]	nueB	0	0	2	0	0	0	0	0	0	0	0	0	0	0	0	0	0	0	0	0	0	0	0	0	0	0	0	0	0	0	0	0	0	0	0	0	0	0	0	0	0	0	0	0	0	0	0
VFG044243(gi:145300216)_(ASA_3329)_iron-regulated_protein_[direct_heme_uptake_system_(IA062)]_[Aeromonas_salmonicida_subsp._salmonicida_A449]	Aeromonas_salmonicida_subsp._salmonicida_A449]	ASA_3329	0	0	2	0	0	0	0	0	0	0	0	0	0	0	0	0	0	0	0	0	0	0	0	0	0	0	0	0	0	0	0	0	0	0	0	0	0	0	0	0	0	0	0	0	0	0	0
VFG038809(gi:145298488)_(flgB)_flagellar_basal_body_protein_FlgB_[Polar_flagella_(CVF786)]_[Aeromonas_salmonicida_subsp._salmonicida_A449]	Aeromonas_salmonicida_subsp._salmonicida_A449]	flgB	0	0	2	0	0	0	0	0	0	0	0	0	0	0	0	0	0	0	0	0	0	0	0	0	0	0	0	0	0	0	0	0	0	0	0	0	0	0	0	0	0	0	0	0	0	0	0
VFG038262(gi:145297589)_(exeA)_general_secretion_pathway_protein_A_[T2SS_(CVF780)]_[Aeromonas_salmonicida_subsp._salmonicida_A449]	Aeromonas_salmonicida_subsp._salmonicida_A449]	exeA	0	0	2	0	0	0	0	0	0	0	0	0	0	0	0	0	0	0	0	0	0	0	0	0	0	0	0	0	0	0	0	0	0	0	0	0	0	0	0	0	0	0	0	0	0	0	0
VFG038302(gi:145300650)_(exeK)_general_secretion_pathway_protein_K_[T2SS_(CVF780)]_[Aeromonas_salmonicida_subsp._salmonicida_A449]	Aeromonas_salmonicida_subsp._salmonicida_A449]	exeK	0	0	2	0	0	0	0	0	0	0	0	0	0	0	0	0	0	0	0	0	0	0	0	0	0	0	0	0	0	0	0	0	0	0	0	0	0	0	0	0	0	0	0	0	0	0	0
VFG044249(gi:145300222)_(hutC)_ABC-type_hemin_transporter,_permease_protein_[direct_heme_uptake_system_(IA062)]_[Aeromonas_salmonicida_subsp._salmonicida_A449]	Aeromonas_salmonicida_subsp._salmonicida_A449]	hutC	0	0	2	0	0	0	0	0	0	0	0	0	0	0	0	0	0	0	0	0	0	0	0	0	0	0	0	0	0	0	0	0	0	0	0	0	0	0	0	0	0	0	0	0	0	0	0
VFG038628(gi:145298346)_(fliF)_flagellar_MS-ring_protein_[Polar_flagella_(CVF786)]_[Aeromonas_salmonicida_subsp._salmonicida_A449]	Aeromonas_salmonicida_subsp._salmonicida_A449]	fliF	0	0	2	0	0	0	0	0	0	0	0	0	0	0	0	0	0	0	0	0	0	0	0	0	0	0	0	0	0	0	0	0	0	0	0	0	0	0	0	0	0	0	0	0	0	0	0
VFG038888(gb|YP_001140312)_(lafS)_LafS,_RNA_polymerase_sigma_factor_[Lateral_flagella_(VF0474)]_[Aeromonas_salmonicida_subsp._salmonicida_A449]	Aeromonas_salmonicida_subsp._salmonicida_A449]	lafS	0	0	2	0	0	0	0	0	0	0	0	0	0	0	0	0	0	0	0	0	0	0	0	0	0	0	0	0	0	0	0	0	0	0	0	0	0	0	0	0	0	0	0	0	0	0	0
VFG038769(gi:4998965)_(flgL)_-_[Polar_flagella_(CVF786)]_[Aeromonas_salmonicida_subsp._salmonicida_A449]	Aeromonas_salmonicida_subsp._salmonicida_A449]	flgL	0	0	2	0	0	0	0	0	0	0	0	0	0	0	0	0	0	0	0	0	0	0	0	0	0	0	0	0	0	0	0	0	0	0	0	0	0	0	0	0	0	0	0	0	0	0	0
VFG038859(gb|YP_001140280)_(lfiR)_lateral_flagellar_biosynthetic_protein_LfiR_[Lateral_flagella_(VF0474)]_[Aeromonas_salmonicida_subsp._salmonicida_A449]	Aeromonas_salmonicida_subsp._salmonicida_A449]	lfiR	0	0	2	0	0	0	0	0	0	0	0	0	0	0	0	0	0	0	0	0	0	0	0	0	0	0	0	0	0	0	0	0	0	0	0	0	0	0	0	0	0	0	0	0	0	0	0
VFG038886(gb|YP_001140310)_(lafE)_LafE,_flagellar_hook_control_length_protein_[Lateral_flagella_(VF0474)]_[Aeromonas_salmonicida_subsp._salmonicida_A449]	Aeromonas_salmonicida_subsp._salmonicida_A449]	lafE	0	0	2	0	0	0	0	0	0	0	0	0	0	0	0	0	0	0	0	0	0	0	0	0	0	0	0	0	0	0	0	0	0	0	0	0	0	0	0	0	0	0	0	0	0	0	0
VFG038644(gi:145298350)_(fliJ)_flagellar_protein_FliJ_[Polar_flagella_(CVF786)]_[Aeromonas_salmonicida_subsp._salmonicida_A449]	Aeromonas_salmonicida_subsp._salmonicida_A449]	fliJ	0	0	2	0	0	0	0	0	0	0	0	0	0	0	0	0	0	0	0	0	0	0	0	0	0	0	0	0	0	0	0	0	0	0	0	0	0	0	0	0	0	0	0	0	0	0	0
VFG038833(gi:145298724)_(pomB2)_flagellar_motor_protein_MotB_[Polar_flagella_(CVF786)]_[Aeromonas_salmonicida_subsp._salmonicida_A449]	Aeromonas_salmonicida_subsp._salmonicida_A449]	pomB2	0	0	2	0	0	0	0	0	0	0	0	0	0	0	0	0	0	0	0	0	0	0	0	0	0	0	0	0	0	0	0	0	0	0	0	0	0	0	0	0	0	0	0	0	0	0	0
VFG038841(gi:145297258)_(flmH)_3-oxoacyl-ACP_reductase_[Polar_flagella_(CVF786)]_[Aeromonas_salmonicida_subsp._salmonicida_A449]	Aeromonas_salmonicida_subsp._salmonicida_A449]	flmH	0	0	2	0	0	0	0	0	0	0	0	0	0	0	0	0	0	0	0	0	0	0	0	0	0	0	0	0	0	0	0	0	0	0	0	0	0	0	0	0	0	0	0	0	0	0	0
VFG038648(gi:145298351)_(fliK)_polar_flagellar_hook-length_control_protein_FliK_[Polar_flagella_(CVF786)]_[Aeromonas_salmonicida_subsp._salmonicida_A449]	Aeromonas_salmonicida_subsp._salmonicida_A449]	fliK	0	0	2	0	0	0	0	0	0	0	0	0	0	0	0	0	0	0	0	0	0	0	0	0	0	0	0	0	0	0	0	0	0	0	0	0	0	0	0	0	0	0	0	0	0	0	0
VFG038821(gi:145298485)_(flgA)_flagellar_basal_body_P-ring_biosynthesis_protein_FlgA_[Polar_flagella_(CVF786)]_[Aeromonas_salmonicida_subsp._salmonicida_A449]	Aeromonas_salmonicida_subsp._salmonicida_A449]	flgA	0	0	2	0	0	0	0	0	0	0	0	0	0	0	0	0	0	0	0	0	0	0	0	0	0	0	0	0	0	0	0	0	0	0	0	0	0	0	0	0	0	0	0	0	0	0	0
VFG038843(gi:145297256)_(flmH)_flagellar_modification_protein_FlmH_[Polar_flagella_(CVF786)]_[Aeromonas_salmonicida_subsp._salmonicida_A449]	Aeromonas_salmonicida_subsp._salmonicida_A449]	flmH	0	0	2	0	0	0	0	0	0	0	0	0	0	0	0	0	0	0	0	0	0	0	0	0	0	0	0	0	0	0	0	0	0	0	0	0	0	0	0	0	0	0	0	0	0	0	0
VFG038890(gb|YP_001140314)_(lafU)_LafU,_chemotaxis_protein_[Lateral_flagella_(VF0474)]_[Aeromonas_salmonicida_subsp._salmonicida_A449]	Aeromonas_salmonicida_subsp._salmonicida_A449]	lafU	0	0	2	0	0	0	0	0	0	0	0	0	0	0	0	0	0	0	0	0	0	0	0	0	0	0	0	0	0	0	0	0	0	0	0	0	0	0	0	0	0	0	0	0	0	0	0
VFG038361(gb|YP_001144268)_(ati1)_Ati2_chaperone_[T3SS_(VF0479)]_[Aeromonas_salmonicida_subsp._salmonicida_A449]	Aeromonas_salmonicida_subsp._salmonicida_A449]	ati1	0	0	2	0	0	0	0	0	0	0	0	0	0	0	0	0	0	0	0	0	0	0	0	0	0	0	0	0	0	0	0	0	0	0	0	0	0	0	0	0	0	0	0	0	0	0	0
VFG038384(gi:145299413)_(ASA_2467)_hypothetical_protein_[T6SS_(CVF782)]_[Aeromonas_salmonicida_subsp._salmonicida_A449]	Aeromonas_salmonicida_subsp._salmonicida_A449]	ASA_2467	0	0	2	0	0	0	0	0	0	0	0	0	0	0	0	0	0	0	0	0	0	0	0	0	0	0	0	0	0	0	0	0	0	0	0	0	0	0	0	0	0	0	0	0	0	0	0
VFG038465(gi:145300500)_(tapT)_type_IV_pilus_protein_TapT_[Tap_pili_(AI103)]_[Aeromonas_salmonicida_subsp._salmonicida_A449]	Aeromonas_salmonicida_subsp._salmonicida_A449]	tapT	0	0	2	0	0	0	0	0	0	0	0	0	0	0	0	0	0	0	0	0	0	0	0	0	0	0	0	0	0	0	0	0	0	0	0	0	0	0	0	0	0	0	0	0	0	0	0
VFG038793(gi:145298492)_(flgF)_flagellar_basal_body_rod_protein_FlgF_[Polar_flagella_(CVF786)]_[Aeromonas_salmonicida_subsp._salmonicida_A449]	Aeromonas_salmonicida_subsp._salmonicida_A449]	flgF	0	0	2	0	0	0	0	0	0	0	0	0	0	0	0	0	0	0	0	0	0	0	0	0	0	0	0	0	0	0	0	0	0	0	0	0	0	0	0	0	0	0	0	0	0	0	0
VFG038608(gi:145300804)_(mshJ)_MSHA_biogenesis_protein_MshJ_[Mannose-sensitive_hemagglutinin_(Msh)_pilus,_type_IV_pili_(CVF785)]_[Aeromonas_salmonicida_subsp._salmonicida_A449]	Aeromonas_salmonicida_subsp._salmonicida_A449]	mshJ	0	0	2	0	0	0	0	0	0	0	0	0	0	0	0	0	0	0	0	0	0	0	0	0	0	0	0	0	0	0	0	0	0	0	0	0	0	0	0	0	0	0	0	0	0	0	0
VFG038569(gi:145300799)_(mshO)_MSHA_biogenesis_protein_MshO_[Mannose-sensitive_hemagglutinin_(Msh)_pilus,_type_IV_pili_(CVF785)]_[Aeromonas_salmonicida_subsp._salmonicida_A449]	Aeromonas_salmonicida_subsp._salmonicida_A449]	mshO	0	0	2	0	0	0	0	0	0	0	0	0	0	0	0	0	0	0	0	0	0	0	0	0	0	0	0	0	0	0	0	0	0	0	0	0	0	0	0	0	0	0	0	0	0	0	0
VFG038728(gi:145298371)_(cheW)_hypothetical_protein_[Polar_flagella_(CVF786)]_[Aeromonas_salmonicida_subsp._salmonicida_A449]	Aeromonas_salmonicida_subsp._salmonicida_A449]	cheW	0	0	2	0	0	0	0	0	0	0	0	0	0	0	0	0	0	0	0	0	0	0	0	0	0	0	0	0	0	0	0	0	0	0	0	0	0	0	0	0	0	0	0	0	0	0	0
VFG044248(gi:145300221)_(hutB)_ABC-type_hemin_transporter,_periplasmic_component_[direct_heme_uptake_system_(IA062)]_[Aeromonas_salmonicida_subsp._salmonicida_A449]	Aeromonas_salmonicida_subsp._salmonicida_A449]	hutB	0	0	2	0	0	0	0	0	0	0	0	0	0	0	0	0	0	0	0	0	0	0	0	0	0	0	0	0	0	0	0	0	0	0	0	0	0	0	0	0	0	0	0	0	0	0	0
VFG038668(gi:145298356)_(fliP)_flagellar_biosynthesis_protein_FliP_[Polar_flagella_(CVF786)]_[Aeromonas_salmonicida_subsp._salmonicida_A449]	Aeromonas_salmonicida_subsp._salmonicida_A449]	fliP	0	0	2	0	0	0	0	0	0	0	0	0	0	0	0	0	0	0	0	0	0	0	0	0	0	0	0	0	0	0	0	0	0	0	0	0	0	0	0	0	0	0	0	0	0	0	0
VFG038640(gi:145298349)_(fliI)_flagellum-specific_ATP_synthase_[Polar_flagella_(CVF786)]_[Aeromonas_salmonicida_subsp._salmonicida_A449]	Aeromonas_salmonicida_subsp._salmonicida_A449]	fliI	0	0	2	0	0	0	0	0	0	0	0	0	0	0	0	0	0	0	0	0	0	0	0	0	0	0	0	0	0	0	0	0	0	0	0	0	0	0	0	0	0	0	0	0	0	0	0
VFG038314(gi:145300653)_(exeN)_general_secretion_pathway_protein_N_[T2SS_(CVF780)]_[Aeromonas_salmonicida_subsp._salmonicida_A449]	Aeromonas_salmonicida_subsp._salmonicida_A449]	exeN	0	0	2	0	0	0	0	0	0	0	0	0	0	0	0	0	0	0	0	0	0	0	0	0	0	0	0	0	0	0	0	0	0	0	0	0	0	0	0	0	0	0	0	0	0	0	0
VFG038880(gb|YP_001140301)_(lfgK)_lateral_flagellar_hook-associated_protein_[Lateral_flagella_(VF0474)]_[Aeromonas_salmonicida_subsp._salmonicida_A449]	Aeromonas_salmonicida_subsp._salmonicida_A449]	lfgK	0	0	2	0	0	0	0	0	0	0	0	0	0	0	0	0	0	0	0	0	0	0	0	0	0	0	0	0	0	0	0	0	0	0	0	0	0	0	0	0	0	0	0	0	0	0	0
VFG038652(gi:145298352)_(fliL)_flagellar_basal_body-associated_protein_FliL_[Polar_flagella_(CVF786)]_[Aeromonas_salmonicida_subsp._salmonicida_A449]	Aeromonas_salmonicida_subsp._salmonicida_A449]	fliL	0	0	2	0	0	0	0	0	0	0	0	0	0	0	0	0	0	0	0	0	0	0	0	0	0	0	0	0	0	0	0	0	0	0	0	0	0	0	0	0	0	0	0	0	0	0	0
VFG038483(gb|YP_001140601)_(tppC)_type_IV_pilus_pseudopilin_[Tap_type_IV_pili_(CVF783)]_[Aeromonas_salmonicida_subsp._salmonicida_A449]	Aeromonas_salmonicida_subsp._salmonicida_A449]	tppC	0	0	2	0	0	0	0	0	0	0	0	0	0	0	0	0	0	0	0	0	0	0	0	0	0	0	0	0	0	0	0	0	0	0	0	0	0	0	0	0	0	0	0	0	0	0	0
VFG038860(gb|YP_001140281)_(lfhB)_lateral_flagellar_biosynthetic_protein,_LfhB_[Lateral_flagella_(VF0474)]_[Aeromonas_salmonicida_subsp._salmonicida_A449]	Aeromonas_salmonicida_subsp._salmonicida_A449]	lfhB	0	0	2	0	0	0	0	0	0	0	0	0	0	0	0	0	0	0	0	0	0	0	0	0	0	0	0	0	0	0	0	0	0	0	0	0	0	0	0	0	0	0	0	0	0	0	0
VFG044244(gi:145300217)_(ASA_3330)_isochorismatase_family_protein_[direct_heme_uptake_system_(IA062)]_[Aeromonas_salmonicida_subsp._salmonicida_A449]	Aeromonas_salmonicida_subsp._salmonicida_A449]	ASA_3330	0	0	2	0	0	0	0	0	0	0	0	0	0	0	0	0	0	0	0	0	0	0	0	0	0	0	0	0	0	0	0	0	0	0	0	0	0	0	0	0	0	0	0	0	0	0	0
VFG038712(gi:145298367)_(cheB-2)_chemotaxis-specific_methylesterase_[Polar_flagella_(CVF786)]_[Aeromonas_salmonicida_subsp._salmonicida_A449]	Aeromonas_salmonicida_subsp._salmonicida_A449]	cheB-2	0	0	2	0	0	0	0	0	0	0	0	0	0	0	0	0	0	0	0	0	0	0	0	0	0	0	0	0	0	0	0	0	0	0	0	0	0	0	0	0	0	0	0	0	0	0	0
VFG038781(gi:145298495)_(flgI)_flagellar_basal_body_P-ring_protein_[Polar_flagella_(CVF786)]_[Aeromonas_salmonicida_subsp._salmonicida_A449]	Aeromonas_salmonicida_subsp._salmonicida_A449]	flgI	0	0	2	0	0	0	0	0	0	0	0	0	0	0	0	0	0	0	0	0	0	0	0	0	0	0	0	0	0	0	0	0	0	0	0	0	0	0	0	0	0	0	0	0	0	0	0
VFG038906(gi:145297880)_(ASA_0824)_membrane_protein_[Hemolysin_III_(CVF793)]_[Aeromonas_salmonicida_subsp._salmonicida_A449]	Aeromonas_salmonicida_subsp._salmonicida_A449]	ASA_0824	0	0	2	0	0	0	0	0	0	0	0	0	0	0	0	0	0	0	0	0	0	0	0	0	0	0	0	0	0	0	0	0	0	0	0	0	0	0	0	0	0	0	0	0	0	0	0
VFG038736(gi:145299589)_(flaB)_flagellin_B_[Polar_flagella_(CVF786)]_[Aeromonas_salmonicida_subsp._salmonicida_A449]	Aeromonas_salmonicida_subsp._salmonicida_A449]	flaB	0	0	2	0	0	0	0	0	0	0	0	0	0	0	0	0	0	0	0	0	0	0	0	0	0	0	0	0	0	0	0	0	0	0	0	0	0	0	0	0	0	0	0	0	0	0	0
VFG038862(gb|YP_001140283)_(lafK)_two-component_system_lateral_flagellar_response_regulator_[Lateral_flagella_(VF0474)]_[Aeromonas_salmonicida_subsp._salmonicida_A449]	Aeromonas_salmonicida_subsp._salmonicida_A449]	lafK	0	0	2	0	0	0	0	0	0	0	0	0	0	0	0	0	0	0	0	0	0	0	0	0	0	0	0	0	0	0	0	0	0	0	0	0	0	0	0	0	0	0	0	0	0	0	0
VFG038817(gi:145298486)_(cheV)_two-component_system_chemotaxis_response_regulator_CheV_[Polar_flagella_(CVF786)]_[Aeromonas_salmonicida_subsp._salmonicida_A449]	Aeromonas_salmonicida_subsp._salmonicida_A449]	cheV	0	0	2	0	0	0	0	0	0	0	0	0	0	0	0	0	0	0	0	0	0	0	0	0	0	0	0	0	0	0	0	0	0	0	0	0	0	0	0	0	0	0	0	0	0	0	0
VFG038494(gi:145297763)_(tppE)_type_IV_pilus_biogenesis_protein_[Tap_type_IV_pili_(CVF783)]_[Aeromonas_salmonicida_subsp._salmonicida_A449]	Aeromonas_salmonicida_subsp._salmonicida_A449]	tppE	0	0	2	0	0	0	0	0	0	0	0	0	0	0	0	0	0	0	0	0	0	0	0	0	0	0	0	0	0	0	0	0	0	0	0	0	0	0	0	0	0	0	0	0	0	0	0
VFG038612(gi:145300805)_(mshI1)_MSHA_biogenesis_protein_MshI1_[Mannose-sensitive_hemagglutinin_(Msh)_pilus,_type_IV_pili_(CVF785)]_[Aeromonas_salmonicida_subsp._salmonicida_A449]	Aeromonas_salmonicida_subsp._salmonicida_A449]	mshI1	0	0	2	0	0	0	0	0	0	0	0	0	0	0	0	0	0	0	0	0	0	0	0	0	0	0	0	0	0	0	0	0	0	0	0	0	0	0	0	0	0	0	0	0	0	0	0
VFG038339(gb|YP_001144289)_(acrV)_Type_III_secretion_system_tip_translocon_AcrV__[T3SS_(VF0479)]_[Aeromonas_salmonicida_subsp._salmonicida_A449]	Aeromonas_salmonicida_subsp._salmonicida_A449]	acrV	0	0	2	0	0	0	0	0	0	0	0	0	0	0	0	0	0	0	0	0	0	0	0	0	0	0	0	0	0	0	0	0	0	0	0	0	0	0	0	0	0	0	0	0	0	0	0
VFG038404(gi:145299404)_(ASA_2457)_hypothetical_protein_[T6SS_(CVF782)]_[Aeromonas_salmonicida_subsp._salmonicida_A449]	Aeromonas_salmonicida_subsp._salmonicida_A449]	ASA_2457	0	0	2	0	0	0	0	0	0	0	0	0	0	0	0	0	0	0	0	0	0	0	0	0	0	0	0	0	0	0	0	0	0	0	0	0	0	0	0	0	0	0	0	0	0	0	0
VFG038394(gi:145299408)_(ASA_2462)_hypothetical_protein_[T6SS_(CVF782)]_[Aeromonas_salmonicida_subsp._salmonicida_A449]	Aeromonas_salmonicida_subsp._salmonicida_A449]	ASA_2462	0	0	2	0	0	0	0	0	0	0	0	0	0	0	0	0	0	0	0	0	0	0	0	0	0	0	0	0	0	0	0	0	0	0	0	0	0	0	0	0	0	0	0	0	0	0	0
VFG038473(gi:145298624)_(tapW)_pilus_retraction_ATPase_[Tap_type_IV_pili_(CVF783)]_[Aeromonas_salmonicida_subsp._salmonicida_A449]	Aeromonas_salmonicida_subsp._salmonicida_A449]	tapW	0	0	2	0	0	0	0	0	0	0	0	0	0	0	0	0	0	0	0	0	0	0	0	0	0	0	0	0	0	0	0	0	0	0	0	0	0	0	0	0	0	0	0	0	0	0	0
VFG038554(gi:145299829)_(flpA)_flp_pilus_prepilin_peptidase_[Flp_type_IV_pili_(CVF784)]_[Aeromonas_salmonicida_subsp._salmonicida_A449]	Aeromonas_salmonicida_subsp._salmonicida_A449]	flpA	0	0	2	0	0	0	0	0	0	0	0	0	0	0	0	0	0	0	0	0	0	0	0	0	0	0	0	0	0	0	0	0	0	0	0	0	0	0	0	0	0	0	0	0	0	0	0
VFG038724(gi:145298370)_(ASA_1361)_SOJ-like_and_chromosome_partitioning_protein_[Polar_flagella_(CVF786)]_[Aeromonas_salmonicida_subsp._salmonicida_A449]	Aeromonas_salmonicida_subsp._salmonicida_A449]	ASA_1361	0	0	2	0	0	0	0	0	0	0	0	0	0	0	0	0	0	0	0	0	0	0	0	0	0	0	0	0	0	0	0	0	0	0	0	0	0	0	0	0	0	0	0	0	0	0	0
VFG038761(gi:145298503)_(flrB)_two-component_system_flagellar_sensor_histidine_kinase_FlrB_[Polar_flagella_(CVF786)]_[Aeromonas_salmonicida_subsp._salmonicida_A449]	Aeromonas_salmonicida_subsp._salmonicida_A449]	flrB	0	0	2	0	0	0	0	0	0	0	0	0	0	0	0	0	0	0	0	0	0	0	0	0	0	0	0	0	0	0	0	0	0	0	0	0	0	0	0	0	0	0	0	0	0	0	0
VFG038777(gi:145298496)_(flgJ)_peptidoglycan_hydrolase_FlgJ_[Polar_flagella_(CVF786)]_[Aeromonas_salmonicida_subsp._salmonicida_A449]	Aeromonas_salmonicida_subsp._salmonicida_A449]	flgJ	0	0	2	0	0	0	0	0	0	0	0	0	0	0	0	0	0	0	0	0	0	0	0	0	0	0	0	0	0	0	0	0	0	0	0	0	0	0	0	0	0	0	0	0	0	0	0
VFG038704(gi:145298365)_(cheZ)_chemotaxis_protein_CheZ_[Polar_flagella_(CVF786)]_[Aeromonas_salmonicida_subsp._salmonicida_A449]	Aeromonas_salmonicida_subsp._salmonicida_A449]	cheZ	0	0	2	0	0	0	0	0	0	0	0	0	0	0	0	0	0	0	0	0	0	0	0	0	0	0	0	0	0	0	0	0	0	0	0	0	0	0	0	0	0	0	0	0	0	0	0
VFG038282(gi:145300645)_(exeF)_general_secretion_pathway_protein_F_[T2SS_(CVF780)]_[Aeromonas_salmonicida_subsp._salmonicida_A449]	Aeromonas_salmonicida_subsp._salmonicida_A449]	exeF	0	0	2	0	0	0	0	0	0	0	0	0	0	0	0	0	0	0	0	0	0	0	0	0	0	0	0	0	0	0	0	0	0	0	0	0	0	0	0	0	0	0	0	0	0	0	0
VFG038754(gi:145299432)_(motY)_sodium-type_polar_flagellum_motor_protein_[Polar_flagella_(CVF786)]_[Aeromonas_salmonicida_subsp._salmonicida_A449]	Aeromonas_salmonicida_subsp._salmonicida_A449]	motY	0	0	2	0	0	0	0	0	0	0	0	0	0	0	0	0	0	0	0	0	0	0	0	0	0	0	0	0	0	0	0	0	0	0	0	0	0	0	0	0	0	0	0	0	0	0	0
VFG038879(gb|YP_001140300)_(flgJ)_peptidoglycan_hydrolase_[Lateral_flagella_(VF0474)]_[Aeromonas_salmonicida_subsp._salmonicida_A449]	Aeromonas_salmonicida_subsp._salmonicida_A449]	flgJ	0	0	2	0	0	0	0	0	0	0	0	0	0	0	0	0	0	0	0	0	0	0	0	0	0	0	0	0	0	0	0	0	0	0	0	0	0	0	0	0	0	0	0	0	0	0	0
VFG044247(gi:145300220)_(hutX)_heme_iron_utilization_protein_[direct_heme_uptake_system_(IA062)]_[Aeromonas_salmonicida_subsp._salmonicida_A449]	Aeromonas_salmonicida_subsp._salmonicida_A449]	hutX	0	0	2	0	0	0	0	0	0	0	0	0	0	0	0	0	0	0	0	0	0	0	0	0	0	0	0	0	0	0	0	0	0	0	0	0	0	0	0	0	0	0	0	0	0	0	0
VFG038744(gi:145299587)_(flaH)_flagellar_hook-associated_protein_2_[Polar_flagella_(CVF786)]_[Aeromonas_salmonicida_subsp._salmonicida_A449]	Aeromonas_salmonicida_subsp._salmonicida_A449]	flaH	0	0	2	0	0	0	0	0	0	0	0	0	0	0	0	0	0	0	0	0	0	0	0	0	0	0	0	0	0	0	0	0	0	0	0	0	0	0	0	0	0	0	0	0	0	0	0
VFG038732(gi:145299590)_(flaA)_flagellin_A_[Polar_flagella_(CVF786)]_[Aeromonas_salmonicida_subsp._salmonicida_A449]	Aeromonas_salmonicida_subsp._salmonicida_A449]	flaA	0	0	2	0	0	0	0	0	0	0	0	0	0	0	0	0	0	0	0	0	0	0	0	0	0	0	0	0	0	0	0	0	0	0	0	0	0	0	0	0	0	0	0	0	0	0	0
VFG038477(gi:145297758)_(tppA)_type_IV_pilus_assembly_protein_[Tap_type_IV_pili_(CVF783)]_[Aeromonas_salmonicida_subsp._salmonicida_A449]	Aeromonas_salmonicida_subsp._salmonicida_A449]	tppA	0	0	2	0	0	0	0	0	0	0	0	0	0	0	0	0	0	0	0	0	0	0	0	0	0	0	0	0	0	0	0	0	0	0	0	0	0	0	0	0	0	0	0	0	0	0	0
VFG038893(gi:145300766)_(aerA/act)_aerolysin_[aerolysin_(TX453)]_[Aeromonas_salmonicida_subsp._salmonicida_A449]	Aeromonas_salmonicida_subsp._salmonicida_A449]	aerA/act	0	0	2	0	0	0	0	0	0	0	0	0	0	0	0	0	0	0	0	0	0	0	0	0	0	0	0	0	0	0	0	0	0	0	0	0	0	0	0	0	0	0	0	0	0	0	0
VFG038469(gi:145300501)_(tapU)_type_IV_pilus_protein_TapU_[Tap_pili_(AI103)]_[Aeromonas_salmonicida_subsp._salmonicida_A449]	Aeromonas_salmonicida_subsp._salmonicida_A449]	tapU	0	0	2	0	0	0	0	0	0	0	0	0	0	0	0	0	0	0	0	0	0	0	0	0	0	0	0	0	0	0	0	0	0	0	0	0	0	0	0	0	0	0	0	0	0	0	0
VFG038720(gi:145298369)_(pomB)_flagellar_motor_protein_MotB_[Polar_flagella_(CVF786)]_[Aeromonas_salmonicida_subsp._salmonicida_A449]	Aeromonas_salmonicida_subsp._salmonicida_A449]	pomB	0	0	2	0	0	0	0	0	0	0	0	0	0	0	0	0	0	0	0	0	0	0	0	0	0	0	0	0	0	0	0	0	0	0	0	0	0	0	0	0	0	0	0	0	0	0	0
VFG038869(gb|YP_001140290)_(lfgN)_lateral_flagellar_protein,_LfgN_[Lateral_flagella_(VF0474)]_[Aeromonas_salmonicida_subsp._salmonicida_A449]	Aeromonas_salmonicida_subsp._salmonicida_A449]	lfgN	0	0	2	0	0	0	0	0	0	0	0	0	0	0	0	0	0	0	0	0	0	0	0	0	0	0	0	0	0	0	0	0	0	0	0	0	0	0	0	0	0	0	0	0	0	0	0
VFG038386(gi:145299412)_(ASA_2466)_hypothetical_protein_[T6SS_(CVF782)]_[Aeromonas_salmonicida_subsp._salmonicida_A449]	Aeromonas_salmonicida_subsp._salmonicida_A449]	ASA_2466	0	0	2	0	0	0	0	0	0	0	0	0	0	0	0	0	0	0	0	0	0	0	0	0	0	0	0	0	0	0	0	0	0	0	0	0	0	0	0	0	0	0	0	0	0	0	0
VFG038318(gi:145297498)_(tapD)_type_IV_prepilin_peptidase_TapD_[Tap_pili_(AI103)]_[Aeromonas_salmonicida_subsp._salmonicida_A449]	Aeromonas_salmonicida_subsp._salmonicida_A449]	tapD	0	0	2	0	0	0	0	0	0	0	0	0	0	0	0	0	0	0	0	0	0	0	0	0	0	0	0	0	0	0	0	0	0	0	0	0	0	0	0	0	0	0	0	0	0	0	0
VFG038379(gi:145299415)_(ASA_2470)_hypothetical_protein_[T6SS_(CVF782)]_[Aeromonas_salmonicida_subsp._salmonicida_A449]	Aeromonas_salmonicida_subsp._salmonicida_A449]	ASA_2470	0	0	2	0	0	0	0	0	0	0	0	0	0	0	0	0	0	0	0	0	0	0	0	0	0	0	0	0	0	0	0	0	0	0	0	0	0	0	0	0	0	0	0	0	0	0	0
VFG038290(gi:145300647)_(exeH)_general_secretion_pathway_protein_H_[T2SS_(CVF780)]_[Aeromonas_salmonicida_subsp._salmonicida_A449]	Aeromonas_salmonicida_subsp._salmonicida_A449]	exeH	0	0	2	0	0	0	0	0	0	0	0	0	0	0	0	0	0	0	0	0	0	0	0	0	0	0	0	0	0	0	0	0	0	0	0	0	0	0	0	0	0	0	0	0	0	0	0
VFG038872(gb|YP_001140293)_(lfgB)_lateral_flagellar_basal_body_protein,_LfgB_[Lateral_flagella_(VF0474)]_[Aeromonas_salmonicida_subsp._salmonicida_A449]	Aeromonas_salmonicida_subsp._salmonicida_A449]	lfgB	0	0	2	0	0	0	0	0	0	0	0	0	0	0	0	0	0	0	0	0	0	0	0	0	0	0	0	0	0	0	0	0	0	0	0	0	0	0	0	0	0	0	0	0	0	0	0
VFG038526(gi:145299824)_(flpH)_flp_pilus_assembly_protein_FlpH_[Flp_type_IV_pili_(CVF784)]_[Aeromonas_salmonicida_subsp._salmonicida_A449]	Aeromonas_salmonicida_subsp._salmonicida_A449]	flpH	0	0	2	0	0	0	0	0	0	0	0	0	0	0	0	0	0	0	0	0	0	0	0	0	0	0	0	0	0	0	0	0	0	0	0	0	0	0	0	0	0	0	0	0	0	0	0
VFG038636(gi:145298348)_(fliH)_polar_flagellar_assembly_protein,_FliH_[Polar_flagella_(CVF786)]_[Aeromonas_salmonicida_subsp._salmonicida_A449]	Aeromonas_salmonicida_subsp._salmonicida_A449]	fliH	0	0	2	0	0	0	0	0	0	0	0	0	0	0	0	0	0	0	0	0	0	0	0	0	0	0	0	0	0	0	0	0	0	0	0	0	0	0	0	0	0	0	0	0	0	0	0
VFG038716(gi:145298368)_(pomA)_MotA/TolQ/ExbB_proton_channel_[Polar_flagella_(CVF786)]_[Aeromonas_salmonicida_subsp._salmonicida_A449]	Aeromonas_salmonicida_subsp._salmonicida_A449]	pomA	0	0	2	0	0	0	0	0	0	0	0	0	0	0	0	0	0	0	0	0	0	0	0	0	0	0	0	0	0	0	0	0	0	0	0	0	0	0	0	0	0	0	0	0	0	0	0
VFG038857(gb|YP_001140278)_(fliP)_flagellar_biosynthesis_protein_FliP_[Lateral_flagella_(VF0474)]_[Aeromonas_salmonicida_subsp._salmonicida_A449]	Aeromonas_salmonicida_subsp._salmonicida_A449]	fliP	0	0	2	0	0	0	0	0	0	0	0	0	0	0	0	0	0	0	0	0	0	0	0	0	0	0	0	0	0	0	0	0	0	0	0	0	0	0	0	0	0	0	0	0	0	0	0
VFG038457(gi:145298151)_(tapP)_type_IV_pilus_biogenesis_protein_TapP_[Tap_pili_(AI103)]_[Aeromonas_salmonicida_subsp._salmonicida_A449]	Aeromonas_salmonicida_subsp._salmonicida_A449]	tapP	0	0	2	0	0	0	0	0	0	0	0	0	0	0	0	0	0	0	0	0	0	0	0	0	0	0	0	0	0	0	0	0	0	0	0	0	0	0	0	0	0	0	0	0	0	0	0
VFG038676(gi:145298358)_(fliR)_flagellar_biosynthesis_protein_FliR_[Polar_flagella_(CVF786)]_[Aeromonas_salmonicida_subsp._salmonicida_A449]	Aeromonas_salmonicida_subsp._salmonicida_A449]	fliR	0	0	2	0	0	0	0	0	0	0	0	0	0	0	0	0	0	0	0	0	0	0	0	0	0	0	0	0	0	0	0	0	0	0	0	0	0	0	0	0	0	0	0	0	0	0	0
VFG038550(gi:4996407)_(flpB)_-_[Flp_type_IV_pili_(CVF784)]_[Aeromonas_salmonicida_subsp._salmonicida_A449]	Aeromonas_salmonicida_subsp._salmonicida_A449]	flpB	0	0	2	0	0	0	0	0	0	0	0	0	0	0	0	0	0	0	0	0	0	0	0	0	0	0	0	0	0	0	0	0	0	0	0	0	0	0	0	0	0	0	0	0	0	0	0
VFG038854(gi:145297252)_(maf-2)_hypothetical_protein_[Polar_flagella_(CVF786)]_[Aeromonas_salmonicida_subsp._salmonicida_A449]	Aeromonas_salmonicida_subsp._salmonicida_A449]	maf-2	0	0	2	0	0	0	0	0	0	0	0	0	0	0	0	0	0	0	0	0	0	0	0	0	0	0	0	0	0	0	0	0	0	0	0	0	0	0	0	0	0	0	0	0	0	0	0
VFG038266(gi:145297588)_(exeB)_general_secretion_pathway_protein_B_[T2SS_(CVF780)]_[Aeromonas_salmonicida_subsp._salmonicida_A449]	Aeromonas_salmonicida_subsp._salmonicida_A449]	exeB	0	0	2	0	0	0	0	0	0	0	0	0	0	0	0	0	0	0	0	0	0	0	0	0	0	0	0	0	0	0	0	0	0	0	0	0	0	0	0	0	0	0	0	0	0	0	0
VFG038656(gi:145298353)_(fliM)_flagellar_motor_switch_protein_FliM_[Polar_flagella_(CVF786)]_[Aeromonas_salmonicida_subsp._salmonicida_A449]	Aeromonas_salmonicida_subsp._salmonicida_A449]	fliM	0	0	2	0	0	0	0	0	0	0	0	0	0	0	0	0	0	0	0	0	0	0	0	0	0	0	0	0	0	0	0	0	0	0	0	0	0	0	0	0	0	0	0	0	0	0	0
VFG038601(gi:145300802)_(mshL)_MSHA_biogenesis_protein_MshL_[Mannose-sensitive_hemagglutinin_(Msh)_pilus,_type_IV_pili_(CVF785)]_[Aeromonas_salmonicida_subsp._salmonicida_A449]	Aeromonas_salmonicida_subsp._salmonicida_A449]	mshL	0	0	2	0	0	0	0	0	0	0	0	0	0	0	0	0	0	0	0	0	0	0	0	0	0	0	0	0	0	0	0	0	0	0	0	0	0	0	0	0	0	0	0	0	0	0	0
VFG038558(gi:145299830)_(flp1)_flp_pilin_[Flp_type_IV_pili_(CVF784)]_[Aeromonas_salmonicida_subsp._salmonicida_A449]	Aeromonas_salmonicida_subsp._salmonicida_A449]	flp1	0	0	2	0	0	0	0	0	0	0	0	0	0	0	0	0	0	0	0	0	0	0	0	0	0	0	0	0	0	0	0	0	0	0	0	0	0	0	0	0	0	0	0	0	0	0	0
VFG038510(gi:145299821)_(flpL)_flp_pilus_assembly_protein_FlpL_[Flp_type_IV_pili_(CVF784)]_[Aeromonas_salmonicida_subsp._salmonicida_A449]	Aeromonas_salmonicida_subsp._salmonicida_A449]	flpL	0	0	2	0	0	0	0	0	0	0	0	0	0	0	0	0	0	0	0	0	0	0	0	0	0	0	0	0	0	0	0	0	0	0	0	0	0	0	0	0	0	0	0	0	0	0	0
VFG038542(gi:145299827)_(flpD)_flp_pilus_assembly_protein_FlpD_[Flp_type_IV_pili_(CVF784)]_[Aeromonas_salmonicida_subsp._salmonicida_A449]	Aeromonas_salmonicida_subsp._salmonicida_A449]	flpD	0	0	2	0	0	0	0	0	0	0	0	0	0	0	0	0	0	0	0	0	0	0	0	0	0	0	0	0	0	0	0	0	0	0	0	0	0	0	0	0	0	0	0	0	0	0	0
VFG038422(gi:145300597)_(fimE)_type_I_pilus_assembly_protein_FimE_[Type_I_fimbriae_(CVF796)]_[Aeromonas_salmonicida_subsp._salmonicida_A449]	Aeromonas_salmonicida_subsp._salmonicida_A449]	fimE	0	0	2	0	0	0	0	0	0	0	0	0	0	0	0	0	0	0	0	0	0	0	0	0	0	0	0	0	0	0	0	0	0	0	0	0	0	0	0	0	0	0	0	0	0	0	0
VFG038866(gb|YP_001140287)_(lfiH)_lateral_flagellar_assembly_protein_FliH_[Lateral_flagella_(VF0474)]_[Aeromonas_salmonicida_subsp._salmonicida_A449]	Aeromonas_salmonicida_subsp._salmonicida_A449]	lfiH	0	0	2	0	0	0	0	0	0	0	0	0	0	0	0	0	0	0	0	0	0	0	0	0	0	0	0	0	0	0	0	0	0	0	0	0	0	0	0	0	0	0	0	0	0	0	0
VFG038410(gi:145300593)_(fimA)_type_I_pilus_pilin_protein_FimA_[Type_I_fimbriae_(CVF796)]_[Aeromonas_salmonicida_subsp._salmonicida_A449]	Aeromonas_salmonicida_subsp._salmonicida_A449]	fimA	0	0	2	0	0	0	0	0	0	0	0	0	0	0	0	0	0	0	0	0	0	0	0	0	0	0	0	0	0	0	0	0	0	0	0	0	0	0	0	0	0	0	0	0	0	0	0
VFG038400(gi:145299405)_(ASA_2459)_hypothetical_protein_[T6SS_(CVF782)]_[Aeromonas_salmonicida_subsp._salmonicida_A449]	Aeromonas_salmonicida_subsp._salmonicida_A449]	ASA_2459	0	0	2	0	0	0	0	0	0	0	0	0	0	0	0	0	0	0	0	0	0	0	0	0	0	0	0	0	0	0	0	0	0	0	0	0	0	0	0	0	0	0	0	0	0	0	0
VFG038514(gi:145299822)_(flpK)_flp_pilus_assembly_protein_FlpK_[Flp_type_IV_pili_(CVF784)]_[Aeromonas_salmonicida_subsp._salmonicida_A449]	Aeromonas_salmonicida_subsp._salmonicida_A449]	flpK	0	0	2	0	0	0	0	0	0	0	0	0	0	0	0	0	0	0	0	0	0	0	0	0	0	0	0	0	0	0	0	0	0	0	0	0	0	0	0	0	0	0	0	0	0	0	0
VFG038530(gi:4996402)_(flpG)_-_[Flp_type_IV_pili_(CVF784)]_[Aeromonas_salmonicida_subsp._salmonicida_A449]	Aeromonas_salmonicida_subsp._salmonicida_A449]	flpG	0	0	2	0	0	0	0	0	0	0	0	0	0	0	0	0	0	0	0	0	0	0	0	0	0	0	0	0	0	0	0	0	0	0	0	0	0	0	0	0	0	0	0	0	0	0	0
VFG038805(gi:145298489)_(flgC)_flagellar_basal_body_rod_protein_FlgC_[Polar_flagella_(CVF786)]_[Aeromonas_salmonicida_subsp._salmonicida_A449]	Aeromonas_salmonicida_subsp._salmonicida_A449]	flgC	0	0	2	0	0	0	0	0	0	0	0	0	0	0	0	0	0	0	0	0	0	0	0	0	0	0	0	0	0	0	0	0	0	0	0	0	0	0	0	0	0	0	0	0	0	0	0
VFG044245(gi:145300218)_(ASA_3331)_hypothetical_protein_[direct_heme_uptake_system_(IA062)]_[Aeromonas_salmonicida_subsp._salmonicida_A449]	Aeromonas_salmonicida_subsp._salmonicida_A449]	ASA_3331	0	0	2	0	0	0	0	0	0	0	0	0	0	0	0	0	0	0	0	0	0	0	0	0	0	0	0	0	0	0	0	0	0	0	0	0	0	0	0	0	0	0	0	0	0	0	0
VFG038825(gi:145298484)_(flgM)_anti-sigma-28_factor_FlgM_[Polar_flagella_(CVF786)]_[Aeromonas_salmonicida_subsp._salmonicida_A449]	Aeromonas_salmonicida_subsp._salmonicida_A449]	flgM	0	0	2	0	0	0	0	0	0	0	0	0	0	0	0	0	0	0	0	0	0	0	0	0	0	0	0	0	0	0	0	0	0	0	0	0	0	0	0	0	0	0	0	0	0	0	0
VFG038449(gi:145298149)_(tapN)_type_IV_pilus_biogenesis_protein_tapN_[Tap_pili_(AI103)]_[Aeromonas_salmonicida_subsp._salmonicida_A449]	Aeromonas_salmonicida_subsp._salmonicida_A449]	tapN	0	0	2	0	0	0	0	0	0	0	0	0	0	0	0	0	0	0	0	0	0	0	0	0	0	0	0	0	0	0	0	0	0	0	0	0	0	0	0	0	0	0	0	0	0	0	0
VFG038785(gi:145298494)_(flgH)_flagellar_basal_body_L-ring_protein_[Polar_flagella_(CVF786)]_[Aeromonas_salmonicida_subsp._salmonicida_A449]	Aeromonas_salmonicida_subsp._salmonicida_A449]	flgH	0	0	2	0	0	0	0	0	0	0	0	0	0	0	0	0	0	0	0	0	0	0	0	0	0	0	0	0	0	0	0	0	0	0	0	0	0	0	0	0	0	0	0	0	0	0	0
VFG038849(gi:145297254)_(flmD)_flagellum_modification_protein_FlmD_[Polar_flagella_(CVF786)]_[Aeromonas_salmonicida_subsp._salmonicida_A449]	Aeromonas_salmonicida_subsp._salmonicida_A449]	flmD	0	0	2	0	0	0	0	0	0	0	0	0	0	0	0	0	0	0	0	0	0	0	0	0	0	0	0	0	0	0	0	0	0	0	0	0	0	0	0	0	0	0	0	0	0	0	0
VFG038518(gi:145299823)_(flpJ)_flp_pilus_assembly_protein_FlpJ_[Flp_type_IV_pili_(CVF784)]_[Aeromonas_salmonicida_subsp._salmonicida_A449]	Aeromonas_salmonicida_subsp._salmonicida_A449]	flpJ	0	0	2	0	0	0	0	0	0	0	0	0	0	0	0	0	0	0	0	0	0	0	0	0	0	0	0	0	0	0	0	0	0	0	0	0	0	0	0	0	0	0	0	0	0	0	0
VFG038620(gi:145297730)_(motX)_sodium-type_flagellar_motor_component_[Polar_flagella_(CVF786)]_[Aeromonas_salmonicida_subsp._salmonicida_A449]	Aeromonas_salmonicida_subsp._salmonicida_A449]	motX	0	0	2	0	0	0	0	0	0	0	0	0	0	0	0	0	0	0	0	0	0	0	0	0	0	0	0	0	0	0	0	0	0	0	0	0	0	0	0	0	0	0	0	0	0	0	0
VFG038680(gi:145298359)_(flhB)_flagellar_biosynthetic_protein_FlhB_[Polar_flagella_(CVF786)]_[Aeromonas_salmonicida_subsp._salmonicida_A449]	Aeromonas_salmonicida_subsp._salmonicida_A449]	flhB	0	0	2	0	0	0	0	0	0	0	0	0	0	0	0	0	0	0	0	0	0	0	0	0	0	0	0	0	0	0	0	0	0	0	0	0	0	0	0	0	0	0	0	0	0	0	0
VFG038390(gi:145299410)_(ASA_2464)_hypothetical_protein_[T6SS_(CVF782)]_[Aeromonas_salmonicida_subsp._salmonicida_A449]	Aeromonas_salmonicida_subsp._salmonicida_A449]	ASA_2464	0	0	2	0	0	0	0	0	0	0	0	0	0	0	0	0	0	0	0	0	0	0	0	0	0	0	0	0	0	0	0	0	0	0	0	0	0	0	0	0	0	0	0	0	0	0	0
VFG038865(gb|YP_001140286)_(fliG)_flagellar_motor_switch_protein_G_[Lateral_flagella_(VF0474)]_[Aeromonas_salmonicida_subsp._salmonicida_A449]	Aeromonas_salmonicida_subsp._salmonicida_A449]	fliG	0	0	2	0	0	0	0	0	0	0	0	0	0	0	0	0	0	0	0	0	0	0	0	0	0	0	0	0	0	0	0	0	0	0	0	0	0	0	0	0	0	0	0	0	0	0	0
VFG038498(gi:145300527)_(tppF)_pilin_[Tap_type_IV_pili_(CVF783)]_[Aeromonas_salmonicida_subsp._salmonicida_A449]	Aeromonas_salmonicida_subsp._salmonicida_A449]	tppF	0	0	2	0	0	0	0	0	0	0	0	0	0	0	0	0	0	0	0	0	0	0	0	0	0	0	0	0	0	0	0	0	0	0	0	0	0	0	0	0	0	0	0	0	0	0	0
VFG038325(gb|YP_001144275)_(ascG)_chaperone_protein_[T3SS_(VF0479)]_[Aeromonas_salmonicida_subsp._salmonicida_A449]	Aeromonas_salmonicida_subsp._salmonicida_A449]	ascG	0	0	2	0	0	0	0	0	0	0	0	0	0	0	0	0	0	0	0	0	0	0	0	0	0	0	0	0	0	0	0	0	0	0	0	0	0	0	0	0	0	0	0	0	0	0	0
VFG038867(gb|YP_001140288)_(lfiI)_lateral_flagellar_FliI-like_assembly_ATPase_[Lateral_flagella_(VF0474)]_[Aeromonas_salmonicida_subsp._salmonicida_A449]	Aeromonas_salmonicida_subsp._salmonicida_A449]	lfiI	0	0	2	0	0	0	0	0	0	0	0	0	0	0	0	0	0	0	0	0	0	0	0	0	0	0	0	0	0	0	0	0	0	0	0	0	0	0	0	0	0	0	0	0	0	0	0
VFG038327(gb|YP_001144277)_(ascE)_chaperone_protein_[T3SS_(VF0479)]_[Aeromonas_salmonicida_subsp._salmonicida_A449]	Aeromonas_salmonicida_subsp._salmonicida_A449]	ascE	0	0	2	0	0	0	0	0	0	0	0	0	0	0	0	0	0	0	0	0	0	0	0	0	0	0	0	0	0	0	0	0	0	0	0	0	0	0	0	0	0	0	0	0	0	0	0
VFG038632(gi:145298347)_(fliG)_flagellar_motor_switch_protein_G_[Polar_flagella_(CVF786)]_[Aeromonas_salmonicida_subsp._salmonicida_A449]	Aeromonas_salmonicida_subsp._salmonicida_A449]	fliG	0	0	2	0	0	0	0	0	0	0	0	0	0	0	0	0	0	0	0	0	0	0	0	0	0	0	0	0	0	0	0	0	0	0	0	0	0	0	0	0	0	0	0	0	0	0	0
VFG038624(gi:145298345)_(fliE)_flagellar_hook-basal_body_protein_[Polar_flagella_(CVF786)]_[Aeromonas_salmonicida_subsp._salmonicida_A449]	Aeromonas_salmonicida_subsp._salmonicida_A449]	fliE	0	0	2	0	0	0	0	0	0	0	0	0	0	0	0	0	0	0	0	0	0	0	0	0	0	0	0	0	0	0	0	0	0	0	0	0	0	0	0	0	0	0	0	0	0	0	0
VFG038696(gi:145298363)_(fliA)_flagellar_biosynthesis_sigma_factor_[Polar_flagella_(CVF786)]_[Aeromonas_salmonicida_subsp._salmonicida_A449]	Aeromonas_salmonicida_subsp._salmonicida_A449]	fliA	0	0	2	0	0	0	0	0	0	0	0	0	0	0	0	0	0	0	0	0	0	0	0	0	0	0	0	0	0	0	0	0	0	0	0	0	0	0	0	0	0	0	0	0	0	0	0
VFG038660(gi:145298354)_(fliN)_polar_flagellar_switch_protein_FliN_[Polar_flagella_(CVF786)]_[Aeromonas_salmonicida_subsp._salmonicida_A449]	Aeromonas_salmonicida_subsp._salmonicida_A449]	fliN	0	0	2	0	0	0	0	0	0	0	0	0	0	0	0	0	0	0	0	0	0	0	0	0	0	0	0	0	0	0	0	0	0	0	0	0	0	0	0	0	0	0	0	0	0	0	0
VFG038426(gi:145300598)_(fimF)_type_I_pilus_assembly_protein_FimF_[Type_I_fimbriae_(CVF796)]_[Aeromonas_salmonicida_subsp._salmonicida_A449]	Aeromonas_salmonicida_subsp._salmonicida_A449]	fimF	0	0	2	0	0	0	0	0	0	0	0	0	0	0	0	0	0	0	0	0	0	0	0	0	0	0	0	0	0	0	0	0	0	0	0	0	0	0	0	0	0	0	0	0	0	0	0
VFG038813(gi:145298487)_(cheR-3)_chemotaxis_methyltransferase_CheR_[Polar_flagella_(CVF786)]_[Aeromonas_salmonicida_subsp._salmonicida_A449]	Aeromonas_salmonicida_subsp._salmonicida_A449]	cheR-3	0	0	2	0	0	0	0	0	0	0	0	0	0	0	0	0	0	0	0	0	0	0	0	0	0	0	0	0	0	0	0	0	0	0	0	0	0	0	0	0	0	0	0	0	0	0	0
VFG038887(gb|YP_001140311)_(lafF)_LafF_[Lateral_flagella_(VF0474)]_[Aeromonas_salmonicida_subsp._salmonicida_A449]	Aeromonas_salmonicida_subsp._salmonicida_A449]	lafF	0	0	2	0	0	0	0	0	0	0	0	0	0	0	0	0	0	0	0	0	0	0	0	0	0	0	0	0	0	0	0	0	0	0	0	0	0	0	0	0	0	0	0	0	0	0	0
VFG038604(gi:145300803)_(mshK)_MSHA_biogenesis_protein_MshK_[Mannose-sensitive_hemagglutinin_(Msh)_pilus,_type_IV_pili_(CVF785)]_[Aeromonas_salmonicida_subsp._salmonicida_A449]	Aeromonas_salmonicida_subsp._salmonicida_A449]	mshK	0	0	2	0	0	0	0	0	0	0	0	0	0	0	0	0	0	0	0	0	0	0	0	0	0	0	0	0	0	0	0	0	0	0	0	0	0	0	0	0	0	0	0	0	0	0	0
VFG038360(gb|YP_001144267)_(ati2)_Type_III_secretion_system_effector_Ati2,_Inositol_polyphosphate_5-phosphatase_[T3SS_(VF0479)]_[Aeromonas_salmonicida_subsp._salmonicida_A449]	Aeromonas_salmonicida_subsp._salmonicida_A449]	ati2	0	0	2	0	0	0	0	0	0	0	0	0	0	0	0	0	0	0	0	0	0	0	0	0	0	0	0	0	0	0	0	0	0	0	0	0	0	0	0	0	0	0	0	0	0	0	0
VFG038855(gb|YP_001140276)_(lfiM)_lateral_flagellar_motor_switch_protein,_LfiM_[Lateral_flagella_(VF0474)]_[Aeromonas_salmonicida_subsp._salmonicida_A449]	Aeromonas_salmonicida_subsp._salmonicida_A449]	lfiM	0	0	2	0	0	0	0	0	0	0	0	0	0	0	0	0	0	0	0	0	0	0	0	0	0	0	0	0	0	0	0	0	0	0	0	0	0	0	0	0	0	0	0	0	0	0	0
VFG038837(gi:145298031)_(pomA2)_flagellar_motor_protein_PomA_[Polar_flagella_(CVF786)]_[Aeromonas_salmonicida_subsp._salmonicida_A449]	Aeromonas_salmonicida_subsp._salmonicida_A449]	pomA2	0	0	2	0	0	0	0	0	0	0	0	0	0	0	0	0	0	0	0	0	0	0	0	0	0	0	0	0	0	0	0	0	0	0	0	0	0	0	0	0	0	0	0	0	0	0	0
VFG038322(gb|YP_001144272)_(ascJ)_type_III_secretion_system_OM_ring_protein_AscJ_[T3SS_(VF0479)]_[Aeromonas_salmonicida_subsp._salmonicida_A449]	Aeromonas_salmonicida_subsp._salmonicida_A449]	ascJ	0	0	2	0	0	0	0	0	0	0	0	0	0	0	0	0	0	0	0	0	0	0	0	0	0	0	0	0	0	0	0	0	0	0	0	0	0	0	0	0	0	0	0	0	0	0	0
VFG038741(gi:145299588)_(flaG)_flagellar_protein_FlaG_[Polar_flagella_(CVF786)]_[Aeromonas_salmonicida_subsp._salmonicida_A449]	Aeromonas_salmonicida_subsp._salmonicida_A449]	flaG	0	0	2	0	0	0	0	0	0	0	0	0	0	0	0	0	0	0	0	0	0	0	0	0	0	0	0	0	0	0	0	0	0	0	0	0	0	0	0	0	0	0	0	0	0	0	0
VFG038875(gb|YP_001140296)_(lfgF)_lateral_flagellar_basal-body_rod_protein_LfgF_[Lateral_flagella_(VF0474)]_[Aeromonas_salmonicida_subsp._salmonicida_A449]	Aeromonas_salmonicida_subsp._salmonicida_A449]	lfgF	0	0	2	0	0	0	0	0	0	0	0	0	0	0	0	0	0	0	0	0	0	0	0	0	0	0	0	0	0	0	0	0	0	0	0	0	0	0	0	0	0	0	0	0	0	0	0
VFG038856(gb|YP_001140277)_(lfiN)_lateral_flagellar_motor_switch_protein,_lfiN_[Lateral_flagella_(VF0474)]_[Aeromonas_salmonicida_subsp._salmonicida_A449]	Aeromonas_salmonicida_subsp._salmonicida_A449]	lfiN	0	0	2	0	0	0	0	0	0	0	0	0	0	0	0	0	0	0	0	0	0	0	0	0	0	0	0	0	0	0	0	0	0	0	0	0	0	0	0	0	0	0	0	0	0	0	0
VFG038294(gi:145300648)_(exeI)_general_secretion_pathway_protein_I_[T2SS_(CVF780)]_[Aeromonas_salmonicida_subsp._salmonicida_A449]	Aeromonas_salmonicida_subsp._salmonicida_A449]	exeI	0	0	2	0	0	0	0	0	0	0	0	0	0	0	0	0	0	0	0	0	0	0	0	0	0	0	0	0	0	0	0	0	0	0	0	0	0	0	0	0	0	0	0	0	0	0	0
VFG038868(gb|YP_001140289)_(lfiJ)_lateral_flagellar_protein,_LfiJ_[Lateral_flagella_(VF0474)]_[Aeromonas_salmonicida_subsp._salmonicida_A449]	Aeromonas_salmonicida_subsp._salmonicida_A449]	lfiJ	0	0	2	0	0	0	0	0	0	0	0	0	0	0	0	0	0	0	0	0	0	0	0	0	0	0	0	0	0	0	0	0	0	0	0	0	0	0	0	0	0	0	0	0	0	0	0
VFG038573(gi:145300800)_(mshD)_fused_MSHA_biogenesis_proteins_MshN_and_MshD_[Mannose-sensitive_hemagglutinin_(Msh)_pilus,_type_IV_pili_(CVF785)]_[Aeromonas_salmonicida_subsp._salmonicida_A449]	Aeromonas_salmonicida_subsp._salmonicida_A449]	mshD	0	0	2	0	0	0	0	0	0	0	0	0	0	0	0	0	0	0	0	0	0	0	0	0	0	0	0	0	0	0	0	0	0	0	0	0	0	0	0	0	0	0	0	0	0	0	0
VFG044246(gi:145300219)_(hutZ)_heme_iron_utilization_protein_[direct_heme_uptake_system_(IA062)]_[Aeromonas_salmonicida_subsp._salmonicida_A449]	Aeromonas_salmonicida_subsp._salmonicida_A449]	hutZ	0	0	2	0	0	0	0	0	0	0	0	0	0	0	0	0	0	0	0	0	0	0	0	0	0	0	0	0	0	0	0	0	0	0	0	0	0	0	0	0	0	0	0	0	0	0	0
VFG038884(gb|YP_001140308)_(lafC)_LafC,_flagellar_export_chaperone_[Lateral_flagella_(VF0474)]_[Aeromonas_salmonicida_subsp._salmonicida_A449]	Aeromonas_salmonicida_subsp._salmonicida_A449]	lafC	0	0	2	0	0	0	0	0	0	0	0	0	0	0	0	0	0	0	0	0	0	0	0	0	0	0	0	0	0	0	0	0	0	0	0	0	0	0	0	0	0	0	0	0	0	0	0
VFG038406(gi:145299403)_(ASA_2456)_hypothetical_protein_[T6SS_(CVF782)]_[Aeromonas_salmonicida_subsp._salmonicida_A449]	Aeromonas_salmonicida_subsp._salmonicida_A449]	ASA_2456	0	0	2	0	0	0	0	0	0	0	0	0	0	0	0	0	0	0	0	0	0	0	0	0	0	0	0	0	0	0	0	0	0	0	0	0	0	0	0	0	0	0	0	0	0	0	0
VFG038522(gi:4996400)_(flpI)_-_[Flp_type_IV_pili_(CVF784)]_[Aeromonas_salmonicida_subsp._salmonicida_A449]	Aeromonas_salmonicida_subsp._salmonicida_A449]	flpI	0	0	2	0	0	0	0	0	0	0	0	0	0	0	0	0	0	0	0	0	0	0	0	0	0	0	0	0	0	0	0	0	0	0	0	0	0	0	0	0	0	0	0	0	0	0	0
VFG038863(gb|YP_001140284)_(lfiE)_lateral_flagellar_hook_basal_body_protein,_LfiE_[Lateral_flagella_(VF0474)]_[Aeromonas_salmonicida_subsp._salmonicida_A449]	Aeromonas_salmonicida_subsp._salmonicida_A449]	lfiE	0	0	2	0	0	0	0	0	0	0	0	0	0	0	0	0	0	0	0	0	0	0	0	0	0	0	0	0	0	0	0	0	0	0	0	0	0	0	0	0	0	0	0	0	0	0	0
VFG038286(gi:145300646)_(exeG)_general_secretion_pathway_protein_G_[T2SS_(CVF780)]_[Aeromonas_salmonicida_subsp._salmonicida_A449]	Aeromonas_salmonicida_subsp._salmonicida_A449]	exeG	0	0	2	0	0	0	0	0	0	0	0	0	0	0	0	0	0	0	0	0	0	0	0	0	0	0	0	0	0	0	0	0	0	0	0	0	0	0	0	0	0	0	0	0	0	0	0
VFG038506(gi:4996623)_(tapF)_-_[Tap_type_IV_pili_(CVF783)]_[Aeromonas_salmonicida_subsp._salmonicida_A449]	Aeromonas_salmonicida_subsp._salmonicida_A449]	tapF	0	0	2	0	0	0	0	0	0	0	0	0	0	0	0	0	0	0	0	0	0	0	0	0	0	0	0	0	0	0	0	0	0	0	0	0	0	0	0	0	0	0	0	0	0	0	0
VFG038330(gb|YP_001144280)_(ascB)_chaperone_protein_[T3SS_(VF0479)]_[Aeromonas_salmonicida_subsp._salmonicida_A449]	Aeromonas_salmonicida_subsp._salmonicida_A449]	ascB	0	0	2	0	0	0	0	0	0	0	0	0	0	0	0	0	0	0	0	0	0	0	0	0	0	0	0	0	0	0	0	0	0	0	0	0	0	0	0	0	0	0	0	0	0	0	0
VFG038345(gb|YP_001144295)_(acr2)_chaperone_protein_[T3SS_(VF0479)]_[Aeromonas_salmonicida_subsp._salmonicida_A449]	Aeromonas_salmonicida_subsp._salmonicida_A449]	acr2	0	0	2	0	0	0	0	0	0	0	0	0	0	0	0	0	0	0	0	0	0	0	0	0	0	0	0	0	0	0	0	0	0	0	0	0	0	0	0	0	0	0	0	0	0	0	0
VFG038870(gb|YP_001140291)_(lfgM)_lateral_flagella_anti-sigma-28_factor,_LfgM_[Lateral_flagella_(VF0474)]_[Aeromonas_salmonicida_subsp._salmonicida_A449]	Aeromonas_salmonicida_subsp._salmonicida_A449]	lfgM	0	0	2	0	0	0	0	0	0	0	0	0	0	0	0	0	0	0	0	0	0	0	0	0	0	0	0	0	0	0	0	0	0	0	0	0	0	0	0	0	0	0	0	0	0	0	0
VFG038358(gb|YP_001144232)_(sycH)_AopH_chaperone_SycH_[T3SS_(VF0479)]_[Aeromonas_salmonicida_subsp._salmonicida_A449]	Aeromonas_salmonicida_subsp._salmonicida_A449]	sycH	0	0	2	0	0	0	0	0	0	0	0	0	0	0	0	0	0	0	0	0	0	0	0	0	0	0	0	0	0	0	0	0	0	0	0	0	0	0	0	0	0	0	0	0	0	0	0
VFG038829(gi:145298483)_(flgN)_flagellar_biosynthetic_protein_FlgN_[Polar_flagella_(CVF786)]_[Aeromonas_salmonicida_subsp._salmonicida_A449]	Aeromonas_salmonicida_subsp._salmonicida_A449]	flgN	0	0	2	0	0	0	0	0	0	0	0	0	0	0	0	0	0	0	0	0	0	0	0	0	0	0	0	0	0	0	0	0	0	0	0	0	0	0	0	0	0	0	0	0	0	0	0
VFG038334(gb|YP_001144284)_(exsE)_Type_III_secretion_system_regulator_[T3SS_(VF0479)]_[Aeromonas_salmonicida_subsp._salmonicida_A449]	Aeromonas_salmonicida_subsp._salmonicida_A449]	exsE	0	0	2	0	0	0	0	0	0	0	0	0	0	0	0	0	0	0	0	0	0	0	0	0	0	0	0	0	0	0	0	0	0	0	0	0	0	0	0	0	0	0	0	0	0	0	0
VFG038700(gi:145298364)_(cheY)_chemotaxis_protein_CheY_[Polar_flagella_(CVF786)]_[Aeromonas_salmonicida_subsp._salmonicida_A449]	Aeromonas_salmonicida_subsp._salmonicida_A449]	cheY	0	0	2	0	0	0	0	0	0	0	0	0	0	0	0	0	0	0	0	0	0	0	0	0	0	0	0	0	0	0	0	0	0	0	0	0	0	0	0	0	0	0	0	0	0	0	0
VFG038873(gb|YP_001140294)_(flgC)_flagellar_basal_body_rod_protein_FlgC_[Lateral_flagella_(VF0474)]_[Aeromonas_salmonicida_subsp._salmonicida_A449]	Aeromonas_salmonicida_subsp._salmonicida_A449]	flgC	0	0	2	0	0	0	0	0	0	0	0	0	0	0	0	0	0	0	0	0	0	0	0	0	0	0	0	0	0	0	0	0	0	0	0	0	0	0	0	0	0	0	0	0	0	0	0
VFG038430(gi:145297500)_(tapA)_type_IV_prepilin_TapA_[Tap_pili_(AI103)]_[Aeromonas_salmonicida_subsp._salmonicida_A449]	Aeromonas_salmonicida_subsp._salmonicida_A449]	tapA	0	0	2	0	0	0	0	0	0	0	0	0	0	0	0	0	0	0	0	0	0	0	0	0	0	0	0	0	0	0	0	0	0	0	0	0	0	0	0	0	0	0	0	0	0	0	0
VFG038326(gb|YP_001144276)_(ascF)_Type_III_secretion_system_needle_complex_subunit_AscF_[T3SS_(VF0479)]_[Aeromonas_salmonicida_subsp._salmonicida_A449]	Aeromonas_salmonicida_subsp._salmonicida_A449]	ascF	0	0	2	0	0	0	0	0	0	0	0	0	0	0	0	0	0	0	0	0	0	0	0	0	0	0	0	0	0	0	0	0	0	0	0	0	0	0	0	0	0	0	0	0	0	0	0
VFG038885(gb|YP_001140309)_(lafX)_LafX_[Lateral_flagella_(VF0474)]_[Aeromonas_salmonicida_subsp._salmonicida_A449]	Aeromonas_salmonicida_subsp._salmonicida_A449]	lafX	0	0	2	0	0	0	0	0	0	0	0	0	0	0	0	0	0	0	0	0	0	0	0	0	0	0	0	0	0	0	0	0	0	0	0	0	0	0	0	0	0	0	0	0	0	0	0
VFG038362(gb|YP_001144317)_(sycO)_AopO_chaperone_[T3SS_(VF0479)]_[Aeromonas_salmonicida_subsp._salmonicida_A449]	Aeromonas_salmonicida_subsp._salmonicida_A449]	sycO	0	0	2	0	0	0	0	0	0	0	0	0	0	0	0	0	0	0	0	0	0	0	0	0	0	0	0	0	0	0	0	0	0	0	0	0	0	0	0	0	0	0	0	0	0	0	0
VFG038692(gi:145298362)_(flhG)_flagellar_biosynthetic_protein_FlhG_[Polar_flagella_(CVF786)]_[Aeromonas_salmonicida_subsp._salmonicida_A449]	Aeromonas_salmonicida_subsp._salmonicida_A449]	flhG	0	0	2	0	0	0	0	0	0	0	0	0	0	0	0	0	0	0	0	0	0	0	0	0	0	0	0	0	0	0	0	0	0	0	0	0	0	0	0	0	0	0	0	0	0	0	0
VFG038418(gi:145300596)_(fimD)_type_I_pilus_chaperone_protein_FimD_[Type_I_fimbriae_(CVF796)]_[Aeromonas_salmonicida_subsp._salmonicida_A449]	Aeromonas_salmonicida_subsp._salmonicida_A449]	fimD	0	0	2	0	0	0	0	0	0	0	0	0	0	0	0	0	0	0	0	0	0	0	0	0	0	0	0	0	0	0	0	0	0	0	0	0	0	0	0	0	0	0	0	0	0	0	0
VFG044037(gi:26245425)_(AAN77507)_hemolysin_[aerolysin_(TX452)]_[Aeromonas_sobria_str._357]	Aeromonas_sobria_str._357]	AAN77507	7	0	2	0	0	0	0	0	0	0	0	0	0	0	0	0	0	0	0	0	0	0	0	0	0	0	0	0	0	0	0	0	0	0	0	0	0	0	0	0	0	0	0	0	0	0	0
VFG044038(gi:116042150)_(ABJ52834)_aerolysin_[aerolysin_(TX454)]_[Aeromonas_veronii_(Aeromonas_ichthiosmia)_str._MTCC_3249]	Aeromonas_veronii_(Aeromonas_ichthiosmia)_str._MTCC_3249]	ABJ52834	1	0	2	0	0	0	0	0	0	0	0	0	0	0	0	0	0	0	0	0	0	0	0	0	0	0	0	0	0	0	0	0	0	0	0	0	0	0	0	0	0	0	0	0	0	0	0
VFG038709(gi:330828819)_(cheA-2)_transducing_histidine_kinase_[Polar_flagella_(CVF786)]_[Aeromonas_veronii_B565]	Aeromonas_veronii_B565]	cheA-2	18	0	2	0	0	0	0	0	0	0	0	0	0	0	0	0	0	0	0	0	0	0	0	0	0	0	0	0	0	0	0	0	0	0	0	0	0	0	0	0	0	0	0	0	0	0	0
VFG038434(gi:330828059)_(tapB)_type_IV-A_pilus_assembly_ATPase_PilB_[Tap_type_IV_pili_(CVF783)]_[Aeromonas_veronii_B565]	Aeromonas_veronii_B565]	tapB	13	0	2	0	0	0	0	0	0	0	0	0	0	0	0	0	0	0	0	0	0	0	0	0	0	0	0	0	0	0	0	0	0	0	0	0	0	0	0	0	0	0	0	0	0	0	0
VFG038818(gi:330830308)_(cheV)_chemotaxis_protein_methyltransferase_CheV_[Polar_flagella_(CVF786)]_[Aeromonas_veronii_B565]	Aeromonas_veronii_B565]	cheV	12	0	2	0	0	0	0	0	0	0	0	0	0	0	0	0	0	0	0	0	0	0	0	0	0	0	0	0	0	0	0	0	0	0	0	0	0	0	0	0	0	0	0	0	0	0	0
VFG038681(gi:330828812)_(flhB)_flagellar_biosynthetic_protein_FlhB_[Polar_flagella_(CVF786)]_[Aeromonas_veronii_B565]	Aeromonas_veronii_B565]	flhB	11	0	2	0	0	0	0	0	0	0	0	0	0	0	0	0	0	0	0	0	0	0	0	0	0	0	0	0	0	0	0	0	0	0	0	0	0	0	0	0	0	0	0	0	0	0	0
VFG038629(gi:330828799)_(fliF)_flagellar_M-ring_protein_FliF_[Polar_flagella_(CVF786)]_[Aeromonas_veronii_B565]	Aeromonas_veronii_B565]	fliF	11	0	2	0	0	0	0	0	0	0	0	0	0	0	0	0	0	0	0	0	0	0	0	0	0	0	0	0	0	0	0	0	0	0	0	0	0	0	0	0	0	0	0	0	0	0	0
VFG038774(gi:330830297)_(flgK)_flagellar_hook-associated_protein_FlgK_[Polar_flagella_(CVF786)]_[Aeromonas_veronii_B565]	Aeromonas_veronii_B565]	flgK	11	0	2	0	0	0	0	0	0	0	0	0	0	0	0	0	0	0	0	0	0	0	0	0	0	0	0	0	0	0	0	0	0	0	0	0	0	0	0	0	0	0	0	0	0	0	0
VFG038446(gi:330828664)_(tapM)_type_IV_pilus_biogenesis_protein_PilM_[Tap_type_IV_pili_(CVF783)]_[Aeromonas_veronii_B565]	Aeromonas_veronii_B565]	tapM	11	0	2	0	0	0	0	0	0	0	0	0	0	0	0	0	0	0	0	0	0	0	0	0	0	0	0	0	0	0	0	0	0	0	0	0	0	0	0	0	0	0	0	0	0	0	0
VFG038641(gi:330828802)_(fliI)_flagellar_protein_export_ATPase_FliI_[Polar_flagella_(CVF786)]_[Aeromonas_veronii_B565]	Aeromonas_veronii_B565]	fliI	10	0	2	0	0	0	0	0	0	0	0	0	0	0	0	0	0	0	0	0	0	0	0	0	0	0	0	0	0	0	0	0	0	0	0	0	0	0	0	0	0	0	0	0	0	0	0
VFG038263(gi:330830587)_(exeA)_general_secretion_pathway_protein_A_[T2SS_(CVF780)]_[Aeromonas_veronii_B565]	Aeromonas_veronii_B565]	exeA	10	0	2	0	0	0	0	0	0	0	0	0	0	0	0	0	0	0	0	0	0	0	0	0	0	0	0	0	0	0	0	0	0	0	0	0	0	0	0	0	0	0	0	0	0	0	0
VFG038758(gi:330830288)_(flrC)_Fis_family_two_component_sigma54_specific_transcriptional_regulator_[Polar_flagella_(CVF786)]_[Aeromonas_veronii_B565]	Aeromonas_veronii_B565]	flrC	9	0	2	0	0	0	0	0	0	0	0	0	0	0	0	0	0	0	0	0	0	0	0	0	0	0	0	0	0	0	0	0	0	0	0	0	0	0	0	0	0	0	0	0	0	0	0
VFG038591(gi:330831363)_(mshE)_type_IV_pilin_[Mannose-sensitive_hemagglutinin_(Msh)_pilus,_type_IV_pili_(CVF785)]_[Aeromonas_veronii_B565]	Aeromonas_veronii_B565]	mshE	9	0	2	0	0	0	0	0	0	0	0	0	0	0	0	0	0	0	0	0	0	0	0	0	0	0	0	0	0	0	0	0	0	0	0	0	0	0	0	0	0	0	0	0	0	0	0
VFG038594(gi:330831364)_(mshN)_hypothetical_protein_[Mannose-sensitive_hemagglutinin_(Msh)_pilus,_type_IV_pili_(CVF785)]_[Aeromonas_veronii_B565]	Aeromonas_veronii_B565]	mshN	9	0	2	0	0	0	0	0	0	0	0	0	0	0	0	0	0	0	0	0	0	0	0	0	0	0	0	0	0	0	0	0	0	0	0	0	0	0	0	0	0	0	0	0	0	0	0
VFG038462(gi:330828668)_(tapQ)_type_IV_pilus_secretin_PilQ_[Tap_type_IV_pili_(CVF783)]_[Aeromonas_veronii_B565]	Aeromonas_veronii_B565]	tapQ	8	0	2	0	0	0	0	0	0	0	0	0	0	0	0	0	0	0	0	0	0	0	0	0	0	0	0	0	0	0	0	0	0	0	0	0	0	0	0	0	0	0	0	0	0	0	0
VFG038721(gi:330828822)_(pomB)_OmpA_family_protein_[Polar_flagella_(CVF786)]_[Aeromonas_veronii_B565]	Aeromonas_veronii_B565]	pomB	8	0	2	0	0	0	0	0	0	0	0	0	0	0	0	0	0	0	0	0	0	0	0	0	0	0	0	0	0	0	0	0	0	0	0	0	0	0	0	0	0	0	0	0	0	0	0
VFG038894(gb|YP_004394278)_(aerA/act)_hemolysin_Asa1_[Aerolysin_AerA/Cytotoxic_enterotoxin_Act_(CVF788)]_[Aeromonas_veronii_B565]	Aeromonas_veronii_B565]	aerA/act	8	0	2	0	0	0	0	0	0	0	0	0	0	0	0	0	0	0	0	0	0	0	0	0	0	0	0	0	0	0	0	0	0	0	0	0	0	0	0	0	0	0	0	0	0	0	0
VFG038503(gi:330829260)_(tapV)_Motility_protein_FimV_[Tap_type_IV_pili_(CVF783)]_[Aeromonas_veronii_B565]	Aeromonas_veronii_B565]	tapV	8	0	2	0	0	0	0	0	0	0	0	0	0	0	0	0	0	0	0	0	0	0	0	0	0	0	0	0	0	0	0	0	0	0	0	0	0	0	0	0	0	0	0	0	0	0	0
VFG038275(gi:330830590)_(exeD)_general_secretion_pathway_protein_D_[T2SS_(CVF780)]_[Aeromonas_veronii_B565]	Aeromonas_veronii_B565]	exeD	8	0	2	0	0	0	0	0	0	0	0	0	0	0	0	0	0	0	0	0	0	0	0	0	0	0	0	0	0	0	0	0	0	0	0	0	0	0	0	0	0	0	0	0	0	0	0
VFG038570(gi:330831356)_(mshO)_MSHA_biogenesis_protein_MshO_[Mannose-sensitive_hemagglutinin_(Msh)_pilus,_type_IV_pili_(CVF785)]_[Aeromonas_veronii_B565]	Aeromonas_veronii_B565]	mshO	8	0	2	0	0	0	0	0	0	0	0	0	0	0	0	0	0	0	0	0	0	0	0	0	0	0	0	0	0	0	0	0	0	0	0	0	0	0	0	0	0	0	0	0	0	0	0
VFG038283(gi:330830592)_(exeF)_general_secretion_pathway_protein_F_[T2SS_(CVF780)]_[Aeromonas_veronii_B565]	Aeromonas_veronii_B565]	exeF	7	0	2	0	0	0	0	0	0	0	0	0	0	0	0	0	0	0	0	0	0	0	0	0	0	0	0	0	0	0	0	0	0	0	0	0	0	0	0	0	0	0	0	0	0	0	0
VFG038470(gi:330831212)_(tapU)_Twitching_motility_protein_PilU_[Tap_type_IV_pili_(CVF783)]_[Aeromonas_veronii_B565]	Aeromonas_veronii_B565]	tapU	7	0	2	0	0	0	0	0	0	0	0	0	0	0	0	0	0	0	0	0	0	0	0	0	0	0	0	0	0	0	0	0	0	0	0	0	0	0	0	0	0	0	0	0	0	0	0
VFG038766(gi:330830290)_(flrA)_FleQ_protein_[Polar_flagella_(CVF786)]_[Aeromonas_veronii_B565]	Aeromonas_veronii_B565]	flrA	7	0	2	0	0	0	0	0	0	0	0	0	0	0	0	0	0	0	0	0	0	0	0	0	0	0	0	0	0	0	0	0	0	0	0	0	0	0	0	0	0	0	0	0	0	0	0
VFG038689(gi:330828814)_(flhF)_flagellar_biosynthesis_protein_FlhF_[Polar_flagella_(CVF786)]_[Aeromonas_veronii_B565]	Aeromonas_veronii_B565]	flhF	7	0	2	0	0	0	0	0	0	0	0	0	0	0	0	0	0	0	0	0	0	0	0	0	0	0	0	0	0	0	0	0	0	0	0	0	0	0	0	0	0	0	0	0	0	0	0
VFG038834(gi:330830900)_(pomB2)_sodium-driven_polar_flagellar_protein_[Polar_flagella_(CVF786)]_[Aeromonas_veronii_B565]	Aeromonas_veronii_B565]	pomB2	7	0	2	0	0	0	0	0	0	0	0	0	0	0	0	0	0	0	0	0	0	0	0	0	0	0	0	0	0	0	0	0	0	0	0	0	0	0	0	0	0	0	0	0	0	0	0
VFG038697(gi:330828816)_(fliA)_RNA_polymerase_sigma_factor_[Polar_flagella_(CVF786)]_[Aeromonas_veronii_B565]	Aeromonas_veronii_B565]	fliA	6	0	2	0	0	0	0	0	0	0	0	0	0	0	0	0	0	0	0	0	0	0	0	0	0	0	0	0	0	0	0	0	0	0	0	0	0	0	0	0	0	0	0	0	0	0	0
VFG038582(gi:330831360)_(mshA)_Msha_pilin_protein_mshb_[Mannose-sensitive_hemagglutinin_(Msh)_pilus,_type_IV_pili_(CVF785)]_[Aeromonas_veronii_B565]	Aeromonas_veronii_B565]	mshA	6	0	2	0	0	0	0	0	0	0	0	0	0	0	0	0	0	0	0	0	0	0	0	0	0	0	0	0	0	0	0	0	0	0	0	0	0	0	0	0	0	0	0	0	0	0	0
VFG038613(gi:330831369)_(mshI1)_MSHA_biogenesis_protein_MshI1_[Mannose-sensitive_hemagglutinin_(Msh)_pilus,_type_IV_pili_(CVF785)]_[Aeromonas_veronii_B565]	Aeromonas_veronii_B565]	mshI1	6	0	2	0	0	0	0	0	0	0	0	0	0	0	0	0	0	0	0	0	0	0	0	0	0	0	0	0	0	0	0	0	0	0	0	0	0	0	0	0	0	0	0	0	0	0	0
VFG038713(gi:330828820)_(cheB-2)_two_component_system_response-regulator/protein-glutamate_methylesterase_CheB_[Polar_flagella_(CVF786)]_[Aeromonas_veronii_B565]	Aeromonas_veronii_B565]	cheB-2	6	0	2	0	0	0	0	0	0	0	0	0	0	0	0	0	0	0	0	0	0	0	0	0	0	0	0	0	0	0	0	0	0	0	0	0	0	0	0	0	0	0	0	0	0	0	0
VFG038657(gi:330828806)_(fliM)_flagellar_motor_switch_protein_FliM_[Polar_flagella_(CVF786)]_[Aeromonas_veronii_B565]	Aeromonas_veronii_B565]	fliM	6	0	2	0	0	0	0	0	0	0	0	0	0	0	0	0	0	0	0	0	0	0	0	0	0	0	0	0	0	0	0	0	0	0	0	0	0	0	0	0	0	0	0	0	0	0	0
VFG038770(gi:330830296)_(flgL)_flagellar_hook-associated_protein_3_[Polar_flagella_(CVF786)]_[Aeromonas_veronii_B565]	Aeromonas_veronii_B565]	flgL	6	0	2	0	0	0	0	0	0	0	0	0	0	0	0	0	0	0	0	0	0	0	0	0	0	0	0	0	0	0	0	0	0	0	0	0	0	0	0	0	0	0	0	0	0	0	0
VFG038315(gi:330830600)_(exeN)_general_secretion_pathway_protein_N_[T2SS_(CVF780)]_[Aeromonas_veronii_B565]	Aeromonas_veronii_B565]	exeN	6	0	2	0	0	0	0	0	0	0	0	0	0	0	0	0	0	0	0	0	0	0	0	0	0	0	0	0	0	0	0	0	0	0	0	0	0	0	0	0	0	0	0	0	0	0	0
VFG038271(gi:330830589)_(exeC)_general_secretion_pathway_protein_C_[T2SS_(CVF780)]_[Aeromonas_veronii_B565]	Aeromonas_veronii_B565]	exeC	6	0	2	0	0	0	0	0	0	0	0	0	0	0	0	0	0	0	0	0	0	0	0	0	0	0	0	0	0	0	0	0	0	0	0	0	0	0	0	0	0	0	0	0	0	0	0
VFG038725(gi:330828823)_(B565_1123)_CobQ/CobB/MinD/ParA_family_protein_[Polar_flagella_(CVF786)]_[Aeromonas_veronii_B565]	Aeromonas_veronii_B565]	B565_1123	6	0	2	0	0	0	0	0	0	0	0	0	0	0	0	0	0	0	0	0	0	0	0	0	0	0	0	0	0	0	0	0	0	0	0	0	0	0	0	0	0	0	0	0	0	0	0
VFG038911(gi:330828638)_(B565_0938)_Thermostable_hemolysin_[Thermostable_hemolysin_(TH)_(CVF794)]_[Aeromonas_veronii_B565]	Aeromonas_veronii_B565]	B565_0938	6	0	2	0	0	0	0	0	0	0	0	0	0	0	0	0	0	0	0	0	0	0	0	0	0	0	0	0	0	0	0	0	0	0	0	0	0	0	0	0	0	0	0	0	0	0	0
VFG038458(gi:330828667)_(tapP)_type_IV_pilus_biogenesis_protein_PilP_[Tap_type_IV_pili_(CVF783)]_[Aeromonas_veronii_B565]	Aeromonas_veronii_B565]	tapP	6	0	2	0	0	0	0	0	0	0	0	0	0	0	0	0	0	0	0	0	0	0	0	0	0	0	0	0	0	0	0	0	0	0	0	0	0	0	0	0	0	0	0	0	0	0	0
VFG038466(gi:330831213)_(tapT)_Pilus_retraction_ATPase_PilT_[Tap_type_IV_pili_(CVF783)]_[Aeromonas_veronii_B565]	Aeromonas_veronii_B565]	tapT	5	0	2	0	0	0	0	0	0	0	0	0	0	0	0	0	0	0	0	0	0	0	0	0	0	0	0	0	0	0	0	0	0	0	0	0	0	0	0	0	0	0	0	0	0	0	0
VFG038786(gi:330830300)_(flgH)_flagellar_L-ring_protein_[Polar_flagella_(CVF786)]_[Aeromonas_veronii_B565]	Aeromonas_veronii_B565]	flgH	5	0	2	0	0	0	0	0	0	0	0	0	0	0	0	0	0	0	0	0	0	0	0	0	0	0	0	0	0	0	0	0	0	0	0	0	0	0	0	0	0	0	0	0	0	0	0
VFG038903(gi:330830274)_(hlyA)_putative_transporter_[Hemolysin,_HlyA_(CVF792)]_[Aeromonas_veronii_B565]	Aeromonas_veronii_B565]	hlyA	5	0	2	0	0	0	0	0	0	0	0	0	0	0	0	0	0	0	0	0	0	0	0	0	0	0	0	0	0	0	0	0	0	0	0	0	0	0	0	0	0	0	0	0	0	0	0
VFG038602(gi:330831366)_(mshL)_MSHA_biogenesis_protein_MshL_[Mannose-sensitive_hemagglutinin_(Msh)_pilus,_type_IV_pili_(CVF785)]_[Aeromonas_veronii_B565]	Aeromonas_veronii_B565]	mshL	5	0	2	0	0	0	0	0	0	0	0	0	0	0	0	0	0	0	0	0	0	0	0	0	0	0	0	0	0	0	0	0	0	0	0	0	0	0	0	0	0	0	0	0	0	0	0
VFG038588(gi:330831362)_(mshG)_GspF_family_protein_[Mannose-sensitive_hemagglutinin_(Msh)_pilus,_type_IV_pili_(CVF785)]_[Aeromonas_veronii_B565]	Aeromonas_veronii_B565]	mshG	5	0	2	0	0	0	0	0	0	0	0	0	0	0	0	0	0	0	0	0	0	0	0	0	0	0	0	0	0	0	0	0	0	0	0	0	0	0	0	0	0	0	0	0	0	0	0
VFG038782(gi:330830299)_(flgI)_flagellar_P-ring_protein_FlgI_[Polar_flagella_(CVF786)]_[Aeromonas_veronii_B565]	Aeromonas_veronii_B565]	flgI	5	0	2	0	0	0	0	0	0	0	0	0	0	0	0	0	0	0	0	0	0	0	0	0	0	0	0	0	0	0	0	0	0	0	0	0	0	0	0	0	0	0	0	0	0	0	0
VFG038693(gi:330828815)_(flhG)_CobQ/CobB/MinD/ParA_family_protein_[Polar_flagella_(CVF786)]_[Aeromonas_veronii_B565]	Aeromonas_veronii_B565]	flhG	4	0	2	0	0	0	0	0	0	0	0	0	0	0	0	0	0	0	0	0	0	0	0	0	0	0	0	0	0	0	0	0	0	0	0	0	0	0	0	0	0	0	0	0	0	0	0
VFG038685(gi:330828813)_(flhA)_flagellar_biosynthesis_protein_FlhA_[Polar_flagella_(CVF786)]_[Aeromonas_veronii_B565]	Aeromonas_veronii_B565]	flhA	4	0	2	0	0	0	0	0	0	0	0	0	0	0	0	0	0	0	0	0	0	0	0	0	0	0	0	0	0	0	0	0	0	0	0	0	0	0	0	0	0	0	0	0	0	0	0
VFG038307(gi:330830598)_(exeL)_general_secretion_pathway_protein_L_[T2SS_(CVF780)]_[Aeromonas_veronii_B565]	Aeromonas_veronii_B565]	exeL	4	0	2	0	0	0	0	0	0	0	0	0	0	0	0	0	0	0	0	0	0	0	0	0	0	0	0	0	0	0	0	0	0	0	0	0	0	0	0	0	0	0	0	0	0	0	0
VFG038303(gi:330830597)_(exeK)_general_secretion_pathway_protein_K_[T2SS_(CVF780)]_[Aeromonas_veronii_B565]	Aeromonas_veronii_B565]	exeK	4	0	2	0	0	0	0	0	0	0	0	0	0	0	0	0	0	0	0	0	0	0	0	0	0	0	0	0	0	0	0	0	0	0	0	0	0	0	0	0	0	0	0	0	0	0	0
VFG038577(gi:330831358)_(mshC)_Msha_pilin_protein_mshc_[Mannose-sensitive_hemagglutinin_(Msh)_pilus,_type_IV_pili_(CVF785)]_[Aeromonas_veronii_B565]	Aeromonas_veronii_B565]	mshC	4	0	2	0	0	0	0	0	0	0	0	0	0	0	0	0	0	0	0	0	0	0	0	0	0	0	0	0	0	0	0	0	0	0	0	0	0	0	0	0	0	0	0	0	0	0	0
VFG038814(gi:330830307)_(cheR-3)_CheR_methyltransferase_[Polar_flagella_(CVF786)]_[Aeromonas_veronii_B565]	Aeromonas_veronii_B565]	cheR-3	4	0	2	0	0	0	0	0	0	0	0	0	0	0	0	0	0	0	0	0	0	0	0	0	0	0	0	0	0	0	0	0	0	0	0	0	0	0	0	0	0	0	0	0	0	0	0
VFG038669(gi:330828809)_(fliP)_flagellar_biosynthetic_protein_FliP_[Polar_flagella_(CVF786)]_[Aeromonas_veronii_B565]	Aeromonas_veronii_B565]	fliP	4	0	2	0	0	0	0	0	0	0	0	0	0	0	0	0	0	0	0	0	0	0	0	0	0	0	0	0	0	0	0	0	0	0	0	0	0	0	0	0	0	0	0	0	0	0	0
VFG038810(gi:330830306)_(flgB)_flagellar_basal-body_rod_protein_FlgB_[Polar_flagella_(CVF786)]_[Aeromonas_veronii_B565]	Aeromonas_veronii_B565]	flgB	4	0	2	0	0	0	0	0	0	0	0	0	0	0	0	0	0	0	0	0	0	0	0	0	0	0	0	0	0	0	0	0	0	0	0	0	0	0	0	0	0	0	0	0	0	0	0
VFG038778(gi:330830298)_(flgJ)_peptidoglycan_hydrolase_FlgJ_[Polar_flagella_(CVF786)]_[Aeromonas_veronii_B565]	Aeromonas_veronii_B565]	flgJ	4	0	2	0	0	0	0	0	0	0	0	0	0	0	0	0	0	0	0	0	0	0	0	0	0	0	0	0	0	0	0	0	0	0	0	0	0	0	0	0	0	0	0	0	0	0	0
VFG038762(gi:330830289)_(flrB)_two_component_system_flagellar_sensor_histidine_kinase_FlrB_[Polar_flagella_(CVF786)]_[Aeromonas_veronii_B565]	Aeromonas_veronii_B565]	flrB	4	0	2	0	0	0	0	0	0	0	0	0	0	0	0	0	0	0	0	0	0	0	0	0	0	0	0	0	0	0	0	0	0	0	0	0	0	0	0	0	0	0	0	0	0	0	0
VFG038474(gi:330829098)_(tapW)_Tfp_pilus_assembly_protein,_ATPase_PilU_[Tap_type_IV_pili_(CVF783)]_[Aeromonas_veronii_B565]	Aeromonas_veronii_B565]	tapW	4	0	2	0	0	0	0	0	0	0	0	0	0	0	0	0	0	0	0	0	0	0	0	0	0	0	0	0	0	0	0	0	0	0	0	0	0	0	0	0	0	0	0	0	0	0	0
VFG038279(gi:330830591)_(exeE)_type_II_secretory_pathway,_ATPase_PulE-like_protein_[T2SS_(CVF780)]_[Aeromonas_veronii_B565]	Aeromonas_veronii_B565]	exeE	4	0	2	0	0	0	0	0	0	0	0	0	0	0	0	0	0	0	0	0	0	0	0	0	0	0	0	0	0	0	0	0	0	0	0	0	0	0	0	0	0	0	0	0	0	0	0
VFG038717(gi:330828821)_(pomA)_MotA/TolQ/ExbB_proton_channel_[Polar_flagella_(CVF786)]_[Aeromonas_veronii_B565]	Aeromonas_veronii_B565]	pomA	4	0	2	0	0	0	0	0	0	0	0	0	0	0	0	0	0	0	0	0	0	0	0	0	0	0	0	0	0	0	0	0	0	0	0	0	0	0	0	0	0	0	0	0	0	0	0
VFG038633(gi:330828800)_(fliG)_flagellar_motor_switch_protein_FliG_[Polar_flagella_(CVF786)]_[Aeromonas_veronii_B565]	Aeromonas_veronii_B565]	fliG	3	0	2	0	0	0	0	0	0	0	0	0	0	0	0	0	0	0	0	0	0	0	0	0	0	0	0	0	0	0	0	0	0	0	0	0	0	0	0	0	0	0	0	0	0	0	0
VFG038454(gi:330828666)_(tapO)_type_IV_pilus_biogenesis_protein_PilO_[Tap_type_IV_pili_(CVF783)]_[Aeromonas_veronii_B565]	Aeromonas_veronii_B565]	tapO	3	0	2	0	0	0	0	0	0	0	0	0	0	0	0	0	0	0	0	0	0	0	0	0	0	0	0	0	0	0	0	0	0	0	0	0	0	0	0	0	0	0	0	0	0	0	0
VFG038319(gi:330828057)_(tapD)_N-methyltransferase_[T2SS_(CVF780)]_[Aeromonas_veronii_B565]	Aeromonas_veronii_B565]	tapD	3	0	2	0	0	0	0	0	0	0	0	0	0	0	0	0	0	0	0	0	0	0	0	0	0	0	0	0	0	0	0	0	0	0	0	0	0	0	0	0	0	0	0	0	0	0	0
VFG038563(gi:330831354)_(mshQ)_MshQ_protein_[Mannose-sensitive_hemagglutinin_(Msh)_pilus,_type_IV_pili_(CVF785)]_[Aeromonas_veronii_B565]	Aeromonas_veronii_B565]	mshQ	3	0	2	0	0	0	0	0	0	0	0	0	0	0	0	0	0	0	0	0	0	0	0	0	0	0	0	0	0	0	0	0	0	0	0	0	0	0	0	0	0	0	0	0	0	0	0
VFG038649(gi:330828804)_(fliK)_putative_polar_flagellar_hook-length_control_protein_FliK_[Polar_flagella_(CVF786)]_[Aeromonas_veronii_B565]	Aeromonas_veronii_B565]	fliK	3	0	2	0	0	0	0	0	0	0	0	0	0	0	0	0	0	0	0	0	0	0	0	0	0	0	0	0	0	0	0	0	0	0	0	0	0	0	0	0	0	0	0	0	0	0	0
VFG038287(gi:330830593)_(exeG)_Pullulanase_G_protein_[T2SS_(CVF780)]_[Aeromonas_veronii_B565]	Aeromonas_veronii_B565]	exeG	3	0	2	0	0	0	0	0	0	0	0	0	0	0	0	0	0	0	0	0	0	0	0	0	0	0	0	0	0	0	0	0	0	0	0	0	0	0	0	0	0	0	0	0	0	0	0
VFG038617(gi:330831370)_(mshI)_MSHA_biogenesis_protein_MshI_[Mannose-sensitive_hemagglutinin_(Msh)_pilus,_type_IV_pili_(CVF785)]_[Aeromonas_veronii_B565]	Aeromonas_veronii_B565]	mshI	3	0	2	0	0	0	0	0	0	0	0	0	0	0	0	0	0	0	0	0	0	0	0	0	0	0	0	0	0	0	0	0	0	0	0	0	0	0	0	0	0	0	0	0	0	0	0
VFG038507(gi:330830070)_(tapF)_type_IV_pilus_biogenesis/stability_protein_PilW_[Tap_type_IV_pili_(CVF783)]_[Aeromonas_veronii_B565]	Aeromonas_veronii_B565]	tapF	3	0	2	0	0	0	0	0	0	0	0	0	0	0	0	0	0	0	0	0	0	0	0	0	0	0	0	0	0	0	0	0	0	0	0	0	0	0	0	0	0	0	0	0	0	0	0
VFG038729(gi:330828824)_(cheW)_CheW_domain-containing_protein_[Polar_flagella_(CVF786)]_[Aeromonas_veronii_B565]	Aeromonas_veronii_B565]	cheW	3	0	2	0	0	0	0	0	0	0	0	0	0	0	0	0	0	0	0	0	0	0	0	0	0	0	0	0	0	0	0	0	0	0	0	0	0	0	0	0	0	0	0	0	0	0	0
VFG038585(gi:330831361)_(mshF)_hypothetical_protein_[Mannose-sensitive_hemagglutinin_(Msh)_pilus,_type_IV_pili_(CVF785)]_[Aeromonas_veronii_B565]	Aeromonas_veronii_B565]	mshF	3	0	2	0	0	0	0	0	0	0	0	0	0	0	0	0	0	0	0	0	0	0	0	0	0	0	0	0	0	0	0	0	0	0	0	0	0	0	0	0	0	0	0	0	0	0	0
VFG038838(gi:330830901)_(pomA2)_chemotaxis_protein_PomA_[Polar_flagella_(CVF786)]_[Aeromonas_veronii_B565]	Aeromonas_veronii_B565]	pomA2	3	0	2	0	0	0	0	0	0	0	0	0	0	0	0	0	0	0	0	0	0	0	0	0	0	0	0	0	0	0	0	0	0	0	0	0	0	0	0	0	0	0	0	0	0	0	0
VFG038598(gi:330831365)_(mshM)_general_secretion_pathway_protein_A_[Mannose-sensitive_hemagglutinin_(Msh)_pilus,_type_IV_pili_(CVF785)]_[Aeromonas_veronii_B565]	Aeromonas_veronii_B565]	mshM	3	0	2	0	0	0	0	0	0	0	0	0	0	0	0	0	0	0	0	0	0	0	0	0	0	0	0	0	0	0	0	0	0	0	0	0	0	0	0	0	0	0	0	0	0	0	0
VFG038790(gi:330830301)_(flgG)_flagellar_basal_body_rod_protein_FlgG_[Polar_flagella_(CVF786)]_[Aeromonas_veronii_B565]	Aeromonas_veronii_B565]	flgG	3	0	2	0	0	0	0	0	0	0	0	0	0	0	0	0	0	0	0	0	0	0	0	0	0	0	0	0	0	0	0	0	0	0	0	0	0	0	0	0	0	0	0	0	0	0	0
VFG038822(gi:330830309)_(flgA)_flagellar_basal_body_P-ring_biosynthesis_protein_FlgA_[Polar_flagella_(CVF786)]_[Aeromonas_veronii_B565]	Aeromonas_veronii_B565]	flgA	3	0	2	0	0	0	0	0	0	0	0	0	0	0	0	0	0	0	0	0	0	0	0	0	0	0	0	0	0	0	0	0	0	0	0	0	0	0	0	0	0	0	0	0	0	0	0
VFG038609(gi:330831368)_(mshJ)_MSHA_biogenesis_protein_MshJ_[Mannose-sensitive_hemagglutinin_(Msh)_pilus,_type_IV_pili_(CVF785)]_[Aeromonas_veronii_B565]	Aeromonas_veronii_B565]	mshJ	3	0	2	0	0	0	0	0	0	0	0	0	0	0	0	0	0	0	0	0	0	0	0	0	0	0	0	0	0	0	0	0	0	0	0	0	0	0	0	0	0	0	0	0	0	0	0
VFG038625(gi:330828798)_(fliE)_flagellar_hook-basal_body_protein_[Polar_flagella_(CVF786)]_[Aeromonas_veronii_B565]	Aeromonas_veronii_B565]	fliE	3	0	2	0	0	0	0	0	0	0	0	0	0	0	0	0	0	0	0	0	0	0	0	0	0	0	0	0	0	0	0	0	0	0	0	0	0	0	0	0	0	0	0	0	0	0	0
VFG038830(gi:330830311)_(flgN)_flagellar_biosynthetic_protein_FlgN_[Polar_flagella_(CVF786)]_[Aeromonas_veronii_B565]	Aeromonas_veronii_B565]	flgN	3	0	2	0	0	0	0	0	0	0	0	0	0	0	0	0	0	0	0	0	0	0	0	0	0	0	0	0	0	0	0	0	0	0	0	0	0	0	0	0	0	0	0	0	0	0	0
VFG038806(gi:330830305)_(flgC)_flagellar_basal-body_rod_protein_FlgC_[Polar_flagella_(CVF786)]_[Aeromonas_veronii_B565]	Aeromonas_veronii_B565]	flgC	3	0	2	0	0	0	0	0	0	0	0	0	0	0	0	0	0	0	0	0	0	0	0	0	0	0	0	0	0	0	0	0	0	0	0	0	0	0	0	0	0	0	0	0	0	0	0
VFG038665(gi:330828808)_(fliO)_flagellar_biosynthesis_protein,_FliO_[Polar_flagella_(CVF786)]_[Aeromonas_veronii_B565]	Aeromonas_veronii_B565]	fliO	3	0	2	0	0	0	0	0	0	0	0	0	0	0	0	0	0	0	0	0	0	0	0	0	0	0	0	0	0	0	0	0	0	0	0	0	0	0	0	0	0	0	0	0	0	0	0
VFG038438(gi:330828058)_(tapC)_type_IV_pilus_assembly_protein_tapC_[Tap_type_IV_pili_(CVF783)]_[Aeromonas_veronii_B565]	Aeromonas_veronii_B565]	tapC	2	0	2	0	0	0	0	0	0	0	0	0	0	0	0	0	0	0	0	0	0	0	0	0	0	0	0	0	0	0	0	0	0	0	0	0	0	0	0	0	0	0	0	0	0	0	0
VFG038267(gi:330830588)_(exeB)_general_secretion_pathway_protein_B_[T2SS_(CVF780)]_[Aeromonas_veronii_B565]	Aeromonas_veronii_B565]	exeB	2	0	2	0	0	0	0	0	0	0	0	0	0	0	0	0	0	0	0	0	0	0	0	0	0	0	0	0	0	0	0	0	0	0	0	0	0	0	0	0	0	0	0	0	0	0	0
VFG038299(gi:330830596)_(exeJ)_general_secretion_pathway_protein_J_[T2SS_(CVF780)]_[Aeromonas_veronii_B565]	Aeromonas_veronii_B565]	exeJ	2	0	2	0	0	0	0	0	0	0	0	0	0	0	0	0	0	0	0	0	0	0	0	0	0	0	0	0	0	0	0	0	0	0	0	0	0	0	0	0	0	0	0	0	0	0	0
VFG038311(gi:330830599)_(exeM)_general_secretion_pathway_protein_M_[T2SS_(CVF780)]_[Aeromonas_veronii_B565]	Aeromonas_veronii_B565]	exeM	2	0	2	0	0	0	0	0	0	0	0	0	0	0	0	0	0	0	0	0	0	0	0	0	0	0	0	0	0	0	0	0	0	0	0	0	0	0	0	0	0	0	0	0	0	0	0
VFG038621(gi:330831196)_(motX)_sodium-type_flagellar_motor_component_[Polar_flagella_(CVF786)]_[Aeromonas_veronii_B565]	Aeromonas_veronii_B565]	motX	2	0	2	0	0	0	0	0	0	0	0	0	0	0	0	0	0	0	0	0	0	0	0	0	0	0	0	0	0	0	0	0	0	0	0	0	0	0	0	0	0	0	0	0	0	0	0
VFG038701(gi:330828817)_(cheY)_response_regulator_containing_CheY-like_receiver,_AAA-type_ATPase,_and_DNA-binding_domains_[Polar_flagella_(CVF786)]_[Aeromonas_veronii_B565]	Aeromonas_veronii_B565]	cheY	2	0	2	0	0	0	0	0	0	0	0	0	0	0	0	0	0	0	0	0	0	0	0	0	0	0	0	0	0	0	0	0	0	0	0	0	0	0	0	0	0	0	0	0	0	0	0
VFG038637(gi:330828801)_(fliH)_flagellar_assembly_protein_FliH_[Polar_flagella_(CVF786)]_[Aeromonas_veronii_B565]	Aeromonas_veronii_B565]	fliH	2	0	2	0	0	0	0	0	0	0	0	0	0	0	0	0	0	0	0	0	0	0	0	0	0	0	0	0	0	0	0	0	0	0	0	0	0	0	0	0	0	0	0	0	0	0	0
VFG038907(gi:330828499)_(B565_0799)_Hemolysin_III_[Hemolysin_III_(CVF793)]_[Aeromonas_veronii_B565]	Aeromonas_veronii_B565]	B565_0799	2	0	2	0	0	0	0	0	0	0	0	0	0	0	0	0	0	0	0	0	0	0	0	0	0	0	0	0	0	0	0	0	0	0	0	0	0	0	0	0	0	0	0	0	0	0	0
VFG038794(gi:330830302)_(flgF)_flagellar_basal-body_rod_protein_FlgF_[Polar_flagella_(CVF786)]_[Aeromonas_veronii_B565]	Aeromonas_veronii_B565]	flgF	2	0	2	0	0	0	0	0	0	0	0	0	0	0	0	0	0	0	0	0	0	0	0	0	0	0	0	0	0	0	0	0	0	0	0	0	0	0	0	0	0	0	0	0	0	0	0
VFG038653(gi:330828805)_(fliL)_flagellar_basal_body-associated_protein_FliL_[Polar_flagella_(CVF786)]_[Aeromonas_veronii_B565]	Aeromonas_veronii_B565]	fliL	2	0	2	0	0	0	0	0	0	0	0	0	0	0	0	0	0	0	0	0	0	0	0	0	0	0	0	0	0	0	0	0	0	0	0	0	0	0	0	0	0	0	0	0	0	0	0
VFG038450(gi:330828665)_(tapN)_type_IV_pilus_biogenesis_PilN_[Tap_type_IV_pili_(CVF783)]_[Aeromonas_veronii_B565]	Aeromonas_veronii_B565]	tapN	1	0	2	0	0	0	0	0	0	0	0	0	0	0	0	0	0	0	0	0	0	0	0	0	0	0	0	0	0	0	0	0	0	0	0	0	0	0	0	0	0	0	0	0	0	0	0
VFG038677(gi:330828811)_(fliR)_flagellar_biosynthetic_protein_fliR_[Polar_flagella_(CVF786)]_[Aeromonas_veronii_B565]	Aeromonas_veronii_B565]	fliR	1	0	2	0	0	0	0	0	0	0	0	0	0	0	0	0	0	0	0	0	0	0	0	0	0	0	0	0	0	0	0	0	0	0	0	0	0	0	0	0	0	0	0	0	0	0	0
VFG038798(gi:330830303)_(flgE)_flagellar_hook_protein_FlgE_[Polar_flagella_(CVF786)]_[Aeromonas_veronii_B565]	Aeromonas_veronii_B565]	flgE	1	0	2	0	0	0	0	0	0	0	0	0	0	0	0	0	0	0	0	0	0	0	0	0	0	0	0	0	0	0	0	0	0	0	0	0	0	0	0	0	0	0	0	0	0	0	0
VFG038673(gi:330828810)_(fliQ)_flagellar_biosynthetic_protein_FliQ_[Polar_flagella_(CVF786)]_[Aeromonas_veronii_B565]	Aeromonas_veronii_B565]	fliQ	1	0	2	0	0	0	0	0	0	0	0	0	0	0	0	0	0	0	0	0	0	0	0	0	0	0	0	0	0	0	0	0	0	0	0	0	0	0	0	0	0	0	0	0	0	0	0
VFG038826(gi:330830310)_(flgM)_anti-sigma-D_factor_[Polar_flagella_(CVF786)]_[Aeromonas_veronii_B565]	Aeromonas_veronii_B565]	flgM	1	0	2	0	0	0	0	0	0	0	0	0	0	0	0	0	0	0	0	0	0	0	0	0	0	0	0	0	0	0	0	0	0	0	0	0	0	0	0	0	0	0	0	0	0	0	0
VFG038645(gi:330828803)_(fliJ)_flagellar_protein_FliJ_[Polar_flagella_(CVF786)]_[Aeromonas_veronii_B565]	Aeromonas_veronii_B565]	fliJ	1	0	2	0	0	0	0	0	0	0	0	0	0	0	0	0	0	0	0	0	0	0	0	0	0	0	0	0	0	0	0	0	0	0	0	0	0	0	0	0	0	0	0	0	0	0	0
VFG038291(gi:330830594)_(exeH)_general_secretion_pathway_protein_H_[T2SS_(CVF780)]_[Aeromonas_veronii_B565]	Aeromonas_veronii_B565]	exeH	1	0	2	0	0	0	0	0	0	0	0	0	0	0	0	0	0	0	0	0	0	0	0	0	0	0	0	0	0	0	0	0	0	0	0	0	0	0	0	0	0	0	0	0	0	0	0
VFG038478(gi:330831169)_(tppA)_TppA_protein_[Tap_type_IV_pili_(CVF783)]_[Aeromonas_veronii_B565]	Aeromonas_veronii_B565]	tppA	1	0	2	0	0	0	0	0	0	0	0	0	0	0	0	0	0	0	0	0	0	0	0	0	0	0	0	0	0	0	0	0	0	0	0	0	0	0	0	0	0	0	0	0	0	0	0
VFG038661(gi:330828807)_(fliN)_flagellar_motor_switch_phosphatase_FliY_[Polar_flagella_(CVF786)]_[Aeromonas_veronii_B565]	Aeromonas_veronii_B565]	fliN	1	0	2	0	0	0	0	0	0	0	0	0	0	0	0	0	0	0	0	0	0	0	0	0	0	0	0	0	0	0	0	0	0	0	0	0	0	0	0	0	0	0	0	0	0	0	0
VFG038705(gi:330828818)_(cheZ)_chemotaxis_protein_CheZ_[Polar_flagella_(CVF786)]_[Aeromonas_veronii_B565]	Aeromonas_veronii_B565]	cheZ	1	0	2	0	0	0	0	0	0	0	0	0	0	0	0	0	0	0	0	0	0	0	0	0	0	0	0	0	0	0	0	0	0	0	0	0	0	0	0	0	0	0	0	0	0	0	0
VFG038605(gi:330831367)_(mshK)_MSHA_biogenesis_protein_MshK_[Mannose-sensitive_hemagglutinin_(Msh)_pilus,_type_IV_pili_(CVF785)]_[Aeromonas_veronii_B565]	Aeromonas_veronii_B565]	mshK	1	0	2	0	0	0	0	0	0	0	0	0	0	0	0	0	0	0	0	0	0	0	0	0	0	0	0	0	0	0	0	0	0	0	0	0	0	0	0	0	0	0	0	0	0	0	0
VFG038495(gi:330831162)_(tppE)_putative_type_IV_pilus_biogenesis_protein_[Tap_type_IV_pili_(CVF783)]_[Aeromonas_veronii_B565]	Aeromonas_veronii_B565]	tppE	0	0	2	0	0	0	0	0	0	0	0	0	0	0	0	0	0	0	0	0	0	0	0	0	0	0	0	0	0	0	0	0	0	0	0	0	0	0	0	0	0	0	0	0	0	0	0
VFG038738(gi:330829154)_(flaB)_flagellin-like_protein_[Polar_flagella_(CVF786)]_[Aeromonas_veronii_B565]	Aeromonas_veronii_B565]	flaB	0	0	2	0	0	0	0	0	0	0	0	0	0	0	0	0	0	0	0	0	0	0	0	0	0	0	0	0	0	0	0	0	0	0	0	0	0	0	0	0	0	0	0	0	0	0	0
VFG038745(gi:330829155)_(flaH)_flagellar_hook-associated_protein_2_[Polar_flagella_(CVF786)]_[Aeromonas_veronii_B565]	Aeromonas_veronii_B565]	flaH	0	0	2	0	0	0	0	0	0	0	0	0	0	0	0	0	0	0	0	0	0	0	0	0	0	0	0	0	0	0	0	0	0	0	0	0	0	0	0	0	0	0	0	0	0	0	0
VFG038539(gi:330830430)_(flpE)_Flp_pilus_assembly_protein_FlpE_[Flp_type_IV_pili_(CVF784)]_[Aeromonas_veronii_B565]	Aeromonas_veronii_B565]	flpE	0	0	2	0	0	0	0	0	0	0	0	0	0	0	0	0	0	0	0	0	0	0	0	0	0	0	0	0	0	0	0	0	0	0	0	0	0	0	0	0	0	0	0	0	0	0	0
VFG038490(gi:330831165)_(tapY1)_TapY1_protein_[Tap_type_IV_pili_(CVF783)]_[Aeromonas_veronii_B565]	Aeromonas_veronii_B565]	tapY1	0	0	2	0	0	0	0	0	0	0	0	0	0	0	0	0	0	0	0	0	0	0	0	0	0	0	0	0	0	0	0	0	0	0	0	0	0	0	0	0	0	0	0	0	0	0	0
VFG038802(gi:330830304)_(flgD)_flagellar_hook_capping_protein_[Polar_flagella_(CVF786)]_[Aeromonas_veronii_B565]	Aeromonas_veronii_B565]	flgD	0	0	2	0	0	0	0	0	0	0	0	0	0	0	0	0	0	0	0	0	0	0	0	0	0	0	0	0	0	0	0	0	0	0	0	0	0	0	0	0	0	0	0	0	0	0	0
VFG038415(gi:330828177)_(fimC)_outer_membrane_usher_protein_[Type_I_fimbriae_(CVF796)]_[Aeromonas_veronii_B565]	Aeromonas_veronii_B565]	fimC	0	0	2	0	0	0	0	0	0	0	0	0	0	0	0	0	0	0	0	0	0	0	0	0	0	0	0	0	0	0	0	0	0	0	0	0	0	0	0	0	0	0	0	0	0	0	0
VFG038737(gi:330829153)_(flaB)_flagellin-like_protein_[Polar_flagella_(CVF786)]_[Aeromonas_veronii_B565]	Aeromonas_veronii_B565]	flaB	0	0	2	0	0	0	0	0	0	0	0	0	0	0	0	0	0	0	0	0	0	0	0	0	0	0	0	0	0	0	0	0	0	0	0	0	0	0	0	0	0	0	0	0	0	0	0
VFG038531(gi:330830428)_(flpG)_Flp_pilus_assembly_protein_TadB_[Flp_type_IV_pili_(CVF784)]_[Aeromonas_veronii_B565]	Aeromonas_veronii_B565]	flpG	0	0	2	0	0	0	0	0	0	0	0	0	0	0	0	0	0	0	0	0	0	0	0	0	0	0	0	0	0	0	0	0	0	0	0	0	0	0	0	0	0	0	0	0	0	0	0
VFG038751(gi:330829158)_(maf-1)_hypothetical_protein_[Polar_flagella_(CVF786)]_[Aeromonas_veronii_B565]	Aeromonas_veronii_B565]	maf-1	0	0	2	0	0	0	0	0	0	0	0	0	0	0	0	0	0	0	0	0	0	0	0	0	0	0	0	0	0	0	0	0	0	0	0	0	0	0	0	0	0	0	0	0	0	0	0
VFG038511(gi:330830423)_(flpL)_protein_FlpL_[Flp_type_IV_pili_(CVF784)]_[Aeromonas_veronii_B565]	Aeromonas_veronii_B565]	flpL	0	0	2	0	0	0	0	0	0	0	0	0	0	0	0	0	0	0	0	0	0	0	0	0	0	0	0	0	0	0	0	0	0	0	0	0	0	0	0	0	0	0	0	0	0	0	0
VFG038419(gi:330828178)_(fimD)_Fimbrial_chaperone_protein_[Type_I_fimbriae_(CVF796)]_[Aeromonas_veronii_B565]	Aeromonas_veronii_B565]	fimD	0	0	2	0	0	0	0	0	0	0	0	0	0	0	0	0	0	0	0	0	0	0	0	0	0	0	0	0	0	0	0	0	0	0	0	0	0	0	0	0	0	0	0	0	0	0	0
VFG038749(gi:330829156)_(flaJ)_flagellar_protein_FliS_[Polar_flagella_(CVF786)]_[Aeromonas_veronii_B565]	Aeromonas_veronii_B565]	flaJ	0	0	2	0	0	0	0	0	0	0	0	0	0	0	0	0	0	0	0	0	0	0	0	0	0	0	0	0	0	0	0	0	0	0	0	0	0	0	0	0	0	0	0	0	0	0	0
VFG038733(gi:330829152)_(flaA)_flagellin-like_protein_[Polar_flagella_(CVF786)]_[Aeromonas_veronii_B565]	Aeromonas_veronii_B565]	flaA	0	0	2	0	0	0	0	0	0	0	0	0	0	0	0	0	0	0	0	0	0	0	0	0	0	0	0	0	0	0	0	0	0	0	0	0	0	0	0	0	0	0	0	0	0	0	0
VFG038527(gi:330830427)_(flpH)_Flp_pilus_assembly_protein_TadC_[Flp_type_IV_pili_(CVF784)]_[Aeromonas_veronii_B565]	Aeromonas_veronii_B565]	flpH	0	0	2	0	0	0	0	0	0	0	0	0	0	0	0	0	0	0	0	0	0	0	0	0	0	0	0	0	0	0	0	0	0	0	0	0	0	0	0	0	0	0	0	0	0	0	0
VFG038423(gi:330828179)_(fimE)_type_I_pilus_assembly_protein_FimE_[Type_I_fimbriae_(CVF796)]_[Aeromonas_veronii_B565]	Aeromonas_veronii_B565]	fimE	0	0	2	0	0	0	0	0	0	0	0	0	0	0	0	0	0	0	0	0	0	0	0	0	0	0	0	0	0	0	0	0	0	0	0	0	0	0	0	0	0	0	0	0	0	0	0
VFG038523(gi:330830426)_(flpI)_Flp_pilus_assembly_protein_TadD_[Flp_type_IV_pili_(CVF784)]_[Aeromonas_veronii_B565]	Aeromonas_veronii_B565]	flpI	0	0	2	0	0	0	0	0	0	0	0	0	0	0	0	0	0	0	0	0	0	0	0	0	0	0	0	0	0	0	0	0	0	0	0	0	0	0	0	0	0	0	0	0	0	0	0
VFG038566(gi:330831355)_(mshP)_MSHA_biogenesis_protein_MshP_[Mannose-sensitive_hemagglutinin_(Msh)_pilus,_type_IV_pili_(CVF785)]_[Aeromonas_veronii_B565]	Aeromonas_veronii_B565]	mshP	0	0	2	0	0	0	0	0	0	0	0	0	0	0	0	0	0	0	0	0	0	0	0	0	0	0	0	0	0	0	0	0	0	0	0	0	0	0	0	0	0	0	0	0	0	0	0
VFG038411(gi:330828175)_(fimA)_Fimbrial_protein_[Type_I_fimbriae_(CVF796)]_[Aeromonas_veronii_B565]	Aeromonas_veronii_B565]	fimA	0	0	2	0	0	0	0	0	0	0	0	0	0	0	0	0	0	0	0	0	0	0	0	0	0	0	0	0	0	0	0	0	0	0	0	0	0	0	0	0	0	0	0	0	0	0	0
VFG038535(gi:330830429)_(flpF)_Flp_pilus_assembly_protein,_ATPase_CpaF_[Flp_type_IV_pili_(CVF784)]_[Aeromonas_veronii_B565]	Aeromonas_veronii_B565]	flpF	0	0	2	0	0	0	0	0	0	0	0	0	0	0	0	0	0	0	0	0	0	0	0	0	0	0	0	0	0	0	0	0	0	0	0	0	0	0	0	0	0	0	0	0	0	0	0
VFG038499(gi:330831157)_(tppF)_putative_pilin_[Tap_type_IV_pili_(CVF783)]_[Aeromonas_veronii_B565]	Aeromonas_veronii_B565]	tppF	0	0	2	0	0	0	0	0	0	0	0	0	0	0	0	0	0	0	0	0	0	0	0	0	0	0	0	0	0	0	0	0	0	0	0	0	0	0	0	0	0	0	0	0	0	0	0
VFG038551(gi:330830433)_(flpB)_Flp_pilus_assembly_protein_CpaB_[Flp_type_IV_pili_(CVF784)]_[Aeromonas_veronii_B565]	Aeromonas_veronii_B565]	flpB	0	0	2	0	0	0	0	0	0	0	0	0	0	0	0	0	0	0	0	0	0	0	0	0	0	0	0	0	0	0	0	0	0	0	0	0	0	0	0	0	0	0	0	0	0	0	0
VFG038574(gi:330831357)_(mshD)_MSHA_biogenesis_protein_MshN/MshD_[Mannose-sensitive_hemagglutinin_(Msh)_pilus,_type_IV_pili_(CVF785)]_[Aeromonas_veronii_B565]	Aeromonas_veronii_B565]	mshD	0	0	2	0	0	0	0	0	0	0	0	0	0	0	0	0	0	0	0	0	0	0	0	0	0	0	0	0	0	0	0	0	0	0	0	0	0	0	0	0	0	0	0	0	0	0	0
VFG038519(gi:330830425)_(flpJ)_protein_FlpJ_[Flp_type_IV_pili_(CVF784)]_[Aeromonas_veronii_B565]	Aeromonas_veronii_B565]	flpJ	0	0	2	0	0	0	0	0	0	0	0	0	0	0	0	0	0	0	0	0	0	0	0	0	0	0	0	0	0	0	0	0	0	0	0	0	0	0	0	0	0	0	0	0	0	0	0
VFG038547(gi:330830432)_(flpC)_protein_transporter,_outer_membrane_secretin_(secretin)_family_[Flp_type_IV_pili_(CVF784)]_[Aeromonas_veronii_B565]	Aeromonas_veronii_B565]	flpC	0	0	2	0	0	0	0	0	0	0	0	0	0	0	0	0	0	0	0	0	0	0	0	0	0	0	0	0	0	0	0	0	0	0	0	0	0	0	0	0	0	0	0	0	0	0	0
VFG038482(gi:330831168)_(tppB)_type_IV_pilus_assembly_protein_[Tap_type_IV_pili_(CVF783)]_[Aeromonas_veronii_B565]	Aeromonas_veronii_B565]	tppB	0	0	2	0	0	0	0	0	0	0	0	0	0	0	0	0	0	0	0	0	0	0	0	0	0	0	0	0	0	0	0	0	0	0	0	0	0	0	0	0	0	0	0	0	0	0	0
VFG038543(gi:330830431)_(flpD)_protein_FlpD_[Flp_type_IV_pili_(CVF784)]_[Aeromonas_veronii_B565]	Aeromonas_veronii_B565]	flpD	0	0	2	0	0	0	0	0	0	0	0	0	0	0	0	0	0	0	0	0	0	0	0	0	0	0	0	0	0	0	0	0	0	0	0	0	0	0	0	0	0	0	0	0	0	0	0
VFG038555(gi:330830434)_(flpA)_Leader_peptidase_PilD_[Flp_type_IV_pili_(CVF784)]_[Aeromonas_veronii_B565]	Aeromonas_veronii_B565]	flpA	0	0	2	0	0	0	0	0	0	0	0	0	0	0	0	0	0	0	0	0	0	0	0	0	0	0	0	0	0	0	0	0	0	0	0	0	0	0	0	0	0	0	0	0	0	0	0
VFG038484(gi:330831167)_(tppC)_TppC_protein_[Tap_type_IV_pili_(CVF783)]_[Aeromonas_veronii_B565]	Aeromonas_veronii_B565]	tppC	0	0	2	0	0	0	0	0	0	0	0	0	0	0	0	0	0	0	0	0	0	0	0	0	0	0	0	0	0	0	0	0	0	0	0	0	0	0	0	0	0	0	0	0	0	0	0
VFG038295(gi:330830595)_(exeI)_general_secretion_pathway_protein_I_[T2SS_(CVF780)]_[Aeromonas_veronii_B565]	Aeromonas_veronii_B565]	exeI	0	0	2	0	0	0	0	0	0	0	0	0	0	0	0	0	0	0	0	0	0	0	0	0	0	0	0	0	0	0	0	0	0	0	0	0	0	0	0	0	0	0	0	0	0	0	0
VFG038579(gi:330831359)_(mshB)_MSHA_pilin_protein_MshA_[Mannose-sensitive_hemagglutinin_(Msh)_pilus,_type_IV_pili_(CVF785)]_[Aeromonas_veronii_B565]	Aeromonas_veronii_B565]	mshB	0	0	2	0	0	0	0	0	0	0	0	0	0	0	0	0	0	0	0	0	0	0	0	0	0	0	0	0	0	0	0	0	0	0	0	0	0	0	0	0	0	0	0	0	0	0	0
VFG038559(gi:330830435)_(flp1)_Flp_pilin_[Flp_type_IV_pili_(CVF784)]_[Aeromonas_veronii_B565]	Aeromonas_veronii_B565]	flp1	0	0	2	0	0	0	0	0	0	0	0	0	0	0	0	0	0	0	0	0	0	0	0	0	0	0	0	0	0	0	0	0	0	0	0	0	0	0	0	0	0	0	0	0	0	0	0
VFG038486(gi:330831166)_(tppD)_hypothetical_protein_[Tap_type_IV_pili_(CVF783)]_[Aeromonas_veronii_B565]	Aeromonas_veronii_B565]	tppD	0	0	2	0	0	0	0	0	0	0	0	0	0	0	0	0	0	0	0	0	0	0	0	0	0	0	0	0	0	0	0	0	0	0	0	0	0	0	0	0	0	0	0	0	0	0	0
VFG038515(gi:330830424)_(flpK)_protein_FlpK_[Flp_type_IV_pili_(CVF784)]_[Aeromonas_veronii_B565]	Aeromonas_veronii_B565]	flpK	0	0	2	0	0	0	0	0	0	0	0	0	0	0	0	0	0	0	0	0	0	0	0	0	0	0	0	0	0	0	0	0	0	0	0	0	0	0	0	0	0	0	0	0	0	0	0
VFG038491(gi:330831164)_(tapY2)_TapY2_protein_[Tap_type_IV_pili_(CVF783)]_[Aeromonas_veronii_B565]	Aeromonas_veronii_B565]	tapY2	0	0	2	0	0	0	0	0	0	0	0	0	0	0	0	0	0	0	0	0	0	0	0	0	0	0	0	0	0	0	0	0	0	0	0	0	0	0	0	0	0	0	0	0	0	0	0
VFG038427(gi:330828180)_(fimF)_Fimbrial_protein_[Type_I_fimbriae_(CVF796)]_[Aeromonas_veronii_B565]	Aeromonas_veronii_B565]	fimF	0	0	2	0	0	0	0	0	0	0	0	0	0	0	0	0	0	0	0	0	0	0	0	0	0	0	0	0	0	0	0	0	0	0	0	0	0	0	0	0	0	0	0	0	0	0	0
VFG043708(gi:261867601)_(D11S_0909)_cytolethal_distending_toxin_protein_B_[Aa-CDT_(TX041)]_[Aggregatibacter_actinomycetemcomitans_D11S-1]	Aggregatibacter_actinomycetemcomitans_D11S-1]	D11S_0909	0	0	2	0	0	0	0	0	0	0	0	0	0	0	0	0	0	0	0	0	0	0	0	0	0	0	0	0	0	0	0	0	0	0	0	0	0	0	0	0	0	0	0	0	0	0	0
VFG043709(gi:261867602)_(D11S_0910)_cytolethal_distending_toxin_protein_C_[Aa-CDT_(TX041)]_[Aggregatibacter_actinomycetemcomitans_D11S-1]	Aggregatibacter_actinomycetemcomitans_D11S-1]	D11S_0910	0	0	2	0	0	0	0	0	0	0	0	0	0	0	0	0	0	0	0	0	0	0	0	0	0	0	0	0	0	0	0	0	0	0	0	0	0	0	0	0	0	0	0	0	0	0	0
VFG043707(gi:261867600)_(D11S_0908)_cytolethal_distending_toxin_protein_A_[Aa-CDT_(TX041)]_[Aggregatibacter_actinomycetemcomitans_D11S-1]	Aggregatibacter_actinomycetemcomitans_D11S-1]	D11S_0908	0	0	2	0	0	0	0	0	0	0	0	0	0	0	0	0	0	0	0	0	0	0	0	0	0	0	0	0	0	0	0	0	0	0	0	0	0	0	0	0	0	0	0	0	0	0	0
VFG042809(gi:26000715)_(tadA)_TadA_[fimbrial_low-molecular-weight_protein_(Flp)_pili_(AI104)]_[Aggregatibacter_actinomycetemcomitans_str._CU1000]	Aggregatibacter_actinomycetemcomitans_str._CU1000]	tadA	1	0	2	0	0	0	0	0	0	0	0	0	0	0	0	0	0	0	0	0	0	0	0	0	0	0	0	0	0	0	0	0	0	0	0	0	0	0	0	0	0	0	0	0	0	0	0
VFG042806(gi:26000712)_(rcpA)_RcpA_[fimbrial_low-molecular-weight_protein_(Flp)_pili_(AI104)]_[Aggregatibacter_actinomycetemcomitans_str._CU1000]	Aggregatibacter_actinomycetemcomitans_str._CU1000]	rcpA	0	0	2	0	0	0	0	0	0	0	0	0	0	0	0	0	0	0	0	0	0	0	0	0	0	0	0	0	0	0	0	0	0	0	0	0	0	0	0	0	0	0	0	0	0	0	0
VFG042815(gi:26000721)_(tadG)_TadG_[fimbrial_low-molecular-weight_protein_(Flp)_pili_(AI104)]_[Aggregatibacter_actinomycetemcomitans_str._CU1000]	Aggregatibacter_actinomycetemcomitans_str._CU1000]	tadG	0	0	2	0	0	0	0	0	0	0	0	0	0	0	0	0	0	0	0	0	0	0	0	0	0	0	0	0	0	0	0	0	0	0	0	0	0	0	0	0	0	0	0	0	0	0	0
VFG042803(gi:26000709)_(flp-2)_Flp2_[fimbrial_low-molecular-weight_protein_(Flp)_pili_(AI104)]_[Aggregatibacter_actinomycetemcomitans_str._CU1000]	Aggregatibacter_actinomycetemcomitans_str._CU1000]	flp-2	0	0	2	0	0	0	0	0	0	0	0	0	0	0	0	0	0	0	0	0	0	0	0	0	0	0	0	0	0	0	0	0	0	0	0	0	0	0	0	0	0	0	0	0	0	0	0
VFG042805(gi:26000711)_(rcpC)_RcpC_[fimbrial_low-molecular-weight_protein_(Flp)_pili_(AI104)]_[Aggregatibacter_actinomycetemcomitans_str._CU1000]	Aggregatibacter_actinomycetemcomitans_str._CU1000]	rcpC	0	0	2	0	0	0	0	0	0	0	0	0	0	0	0	0	0	0	0	0	0	0	0	0	0	0	0	0	0	0	0	0	0	0	0	0	0	0	0	0	0	0	0	0	0	0	0
VFG042814(gi:26000720)_(tadF)_TadF_[fimbrial_low-molecular-weight_protein_(Flp)_pili_(AI104)]_[Aggregatibacter_actinomycetemcomitans_str._CU1000]	Aggregatibacter_actinomycetemcomitans_str._CU1000]	tadF	0	0	2	0	0	0	0	0	0	0	0	0	0	0	0	0	0	0	0	0	0	0	0	0	0	0	0	0	0	0	0	0	0	0	0	0	0	0	0	0	0	0	0	0	0	0	0
VFG042813(gi:26000719)_(tadE)_TadE_[fimbrial_low-molecular-weight_protein_(Flp)_pili_(AI104)]_[Aggregatibacter_actinomycetemcomitans_str._CU1000]	Aggregatibacter_actinomycetemcomitans_str._CU1000]	tadE	0	0	2	0	0	0	0	0	0	0	0	0	0	0	0	0	0	0	0	0	0	0	0	0	0	0	0	0	0	0	0	0	0	0	0	0	0	0	0	0	0	0	0	0	0	0	0
VFG042808(gi:26000714)_(tadZ)_TadZ_[fimbrial_low-molecular-weight_protein_(Flp)_pili_(AI104)]_[Aggregatibacter_actinomycetemcomitans_str._CU1000]	Aggregatibacter_actinomycetemcomitans_str._CU1000]	tadZ	0	0	2	0	0	0	0	0	0	0	0	0	0	0	0	0	0	0	0	0	0	0	0	0	0	0	0	0	0	0	0	0	0	0	0	0	0	0	0	0	0	0	0	0	0	0	0
VFG042804(gi:26000710)_(tadV)_TadV_[fimbrial_low-molecular-weight_protein_(Flp)_pili_(AI104)]_[Aggregatibacter_actinomycetemcomitans_str._CU1000]	Aggregatibacter_actinomycetemcomitans_str._CU1000]	tadV	0	0	2	0	0	0	0	0	0	0	0	0	0	0	0	0	0	0	0	0	0	0	0	0	0	0	0	0	0	0	0	0	0	0	0	0	0	0	0	0	0	0	0	0	0	0	0
VFG042811(gi:26000717)_(tadC)_TadC_[fimbrial_low-molecular-weight_protein_(Flp)_pili_(AI104)]_[Aggregatibacter_actinomycetemcomitans_str._CU1000]	Aggregatibacter_actinomycetemcomitans_str._CU1000]	tadC	0	0	2	0	0	0	0	0	0	0	0	0	0	0	0	0	0	0	0	0	0	0	0	0	0	0	0	0	0	0	0	0	0	0	0	0	0	0	0	0	0	0	0	0	0	0	0
VFG042802(gi:26000708)_(flp-1)_Flp1_[fimbrial_low-molecular-weight_protein_(Flp)_pili_(AI104)]_[Aggregatibacter_actinomycetemcomitans_str._CU1000]	Aggregatibacter_actinomycetemcomitans_str._CU1000]	flp-1	0	0	2	0	0	0	0	0	0	0	0	0	0	0	0	0	0	0	0	0	0	0	0	0	0	0	0	0	0	0	0	0	0	0	0	0	0	0	0	0	0	0	0	0	0	0	0
VFG042812(gi:26000718)_(tadD)_TadD_[fimbrial_low-molecular-weight_protein_(Flp)_pili_(AI104)]_[Aggregatibacter_actinomycetemcomitans_str._CU1000]	Aggregatibacter_actinomycetemcomitans_str._CU1000]	tadD	0	0	2	0	0	0	0	0	0	0	0	0	0	0	0	0	0	0	0	0	0	0	0	0	0	0	0	0	0	0	0	0	0	0	0	0	0	0	0	0	0	0	0	0	0	0	0
VFG042810(gi:26000716)_(tadB)_TadB_[fimbrial_low-molecular-weight_protein_(Flp)_pili_(AI104)]_[Aggregatibacter_actinomycetemcomitans_str._CU1000]	Aggregatibacter_actinomycetemcomitans_str._CU1000]	tadB	0	0	2	0	0	0	0	0	0	0	0	0	0	0	0	0	0	0	0	0	0	0	0	0	0	0	0	0	0	0	0	0	0	0	0	0	0	0	0	0	0	0	0	0	0	0	0
VFG042807(gi:26000713)_(rcpB)_RcpB_[fimbrial_low-molecular-weight_protein_(Flp)_pili_(AI104)]_[Aggregatibacter_actinomycetemcomitans_str._CU1000]	Aggregatibacter_actinomycetemcomitans_str._CU1000]	rcpB	0	0	2	0	0	0	0	0	0	0	0	0	0	0	0	0	0	0	0	0	0	0	0	0	0	0	0	0	0	0	0	0	0	0	0	0	0	0	0	0	0	0	0	0	0	0	0
VFG041055(gi:159186121)_(impK)_OmpA-like_porin_[Imp_(SS195)]_[Agrobacterium_tumefaciens_str._C58]	Agrobacterium_tumefaciens_str._C58]	impK	0	0	2	0	0	0	0	0	0	0	0	0	0	0	0	0	0	0	0	0	0	0	0	0	0	0	0	0	0	0	0	0	0	0	0	0	0	0	0	0	0	0	0	0	0	0	0
VFG041362(gi:16119792)_(virB10)_type_IV_secretion_system_protein_VirB10_[VirB/VirD_system_(SS049)]_[Agrobacterium_tumefaciens_str._C58]	Agrobacterium_tumefaciens_str._C58]	virB10	0	0	2	0	0	0	0	0	0	0	0	0	0	0	0	0	0	0	0	0	0	0	0	0	0	0	0	0	0	0	0	0	0	0	0	0	0	0	0	0	0	0	0	0	0	0	0
VFG041366(gi:16119801)_(virD5)_virA/G_regulated_protein_[VirB/VirD_system_(SS049)]_[Agrobacterium_tumefaciens_str._C58]	Agrobacterium_tumefaciens_str._C58]	virD5	0	0	2	0	0	0	0	0	0	0	0	0	0	0	0	0	0	0	0	0	0	0	0	0	0	0	0	0	0	0	0	0	0	0	0	0	0	0	0	0	0	0	0	0	0	0	0
VFG041057(gi:15890648)_(impI)_putative_forkhead-type_phosphopeptide-binding_protein_[Imp_(SS195)]_[Agrobacterium_tumefaciens_str._C58]	Agrobacterium_tumefaciens_str._C58]	impI	0	0	2	0	0	0	0	0	0	0	0	0	0	0	0	0	0	0	0	0	0	0	0	0	0	0	0	0	0	0	0	0	0	0	0	0	0	0	0	0	0	0	0	0	0	0	0
VFG041052(gi:159186119)_(impN)_serine/threonine_protein_kinase_[Imp_(SS195)]_[Agrobacterium_tumefaciens_str._C58]	Agrobacterium_tumefaciens_str._C58]	impN	0	0	2	0	0	0	0	0	0	0	0	0	0	0	0	0	0	0	0	0	0	0	0	0	0	0	0	0	0	0	0	0	0	0	0	0	0	0	0	0	0	0	0	0	0	0	0
VFG041066(gi:159186125)_(clpV)_ATP-dependent_Clp_protease,_ATP-binding_subunit_[Imp_(SS195)]_[Agrobacterium_tumefaciens_str._C58]	Agrobacterium_tumefaciens_str._C58]	clpV	0	0	2	0	0	0	0	0	0	0	0	0	0	0	0	0	0	0	0	0	0	0	0	0	0	0	0	0	0	0	0	0	0	0	0	0	0	0	0	0	0	0	0	0	0	0	0
VFG041363(gi:41223310)_(virB11)_type_IV_secretion_system_protein_VirB11_[VirB/VirD_system_(SS049)]_[Agrobacterium_tumefaciens_str._C58]	Agrobacterium_tumefaciens_str._C58]	virB11	0	0	2	0	0	0	0	0	0	0	0	0	0	0	0	0	0	0	0	0	0	0	0	0	0	0	0	0	0	0	0	0	0	0	0	0	0	0	0	0	0	0	0	0	0	0	0
VFG041054(gi:15890651)_(impL)_IcmF_family_protein_[Imp_(SS195)]_[Agrobacterium_tumefaciens_str._C58]	Agrobacterium_tumefaciens_str._C58]	impL	0	0	2	0	0	0	0	0	0	0	0	0	0	0	0	0	0	0	0	0	0	0	0	0	0	0	0	0	0	0	0	0	0	0	0	0	0	0	0	0	0	0	0	0	0	0	0
VFG041356(gi:16119786)_(virB4)_type_IV_secretion_system_protein_VirB4_[VirB/VirD_system_(SS049)]_[Agrobacterium_tumefaciens_str._C58]	Agrobacterium_tumefaciens_str._C58]	virB4	0	0	2	0	0	0	0	0	0	0	0	0	0	0	0	0	0	0	0	0	0	0	0	0	0	0	0	0	0	0	0	0	0	0	0	0	0	0	0	0	0	0	0	0	0	0	0
VFG041353(gi:41223307)_(virB1)_type_IV_secretion_system_lytic_transglycosylase_VirB1_[VirB/VirD_system_(SS049)]_[Agrobacterium_tumefaciens_str._C58]	Agrobacterium_tumefaciens_str._C58]	virB1	0	0	2	0	0	0	0	0	0	0	0	0	0	0	0	0	0	0	0	0	0	0	0	0	0	0	0	0	0	0	0	0	0	0	0	0	0	0	0	0	0	0	0	0	0	0	0
VFG041355(gi:16119784)_(virB3)_type_IV_secretion_system_protein_VirB3_[VirB/VirD_system_(SS049)]_[Agrobacterium_tumefaciens_str._C58]	Agrobacterium_tumefaciens_str._C58]	virB3	0	0	2	0	0	0	0	0	0	0	0	0	0	0	0	0	0	0	0	0	0	0	0	0	0	0	0	0	0	0	0	0	0	0	0	0	0	0	0	0	0	0	0	0	0	0	0
VFG041365(gi:41223312)_(virD4)_type_IV_secretion_system_protein_VirD4_[VirB/VirD_system_(SS049)]_[Agrobacterium_tumefaciens_str._C58]	Agrobacterium_tumefaciens_str._C58]	virD4	0	0	2	0	0	0	0	0	0	0	0	0	0	0	0	0	0	0	0	0	0	0	0	0	0	0	0	0	0	0	0	0	0	0	0	0	0	0	0	0	0	0	0	0	0	0	0
VFG041056(gi:15890649)_(impJ)_hypothetical_protein_[Imp_(SS195)]_[Agrobacterium_tumefaciens_str._C58]	Agrobacterium_tumefaciens_str._C58]	impJ	0	0	2	0	0	0	0	0	0	0	0	0	0	0	0	0	0	0	0	0	0	0	0	0	0	0	0	0	0	0	0	0	0	0	0	0	0	0	0	0	0	0	0	0	0	0	0
VFG041352(gi:16119971)_(virF)_exported_virulence_protein_[VirB/VirD_system_(SS049)]_[Agrobacterium_tumefaciens_str._C58]	Agrobacterium_tumefaciens_str._C58]	virF	0	0	2	0	0	0	0	0	0	0	0	0	0	0	0	0	0	0	0	0	0	0	0	0	0	0	0	0	0	0	0	0	0	0	0	0	0	0	0	0	0	0	0	0	0	0	0
VFG041070(gi:15890635)_(vgrG)_VgrG_protein_[Imp_(SS195)]_[Agrobacterium_tumefaciens_str._C58]	Agrobacterium_tumefaciens_str._C58]	vgrG	0	0	2	0	0	0	0	0	0	0	0	0	0	0	0	0	0	0	0	0	0	0	0	0	0	0	0	0	0	0	0	0	0	0	0	0	0	0	0	0	0	0	0	0	0	0	0
VFG041368(gi:16119806)_(virE3)_virA/G_regulated_protein_[VirB/VirD_system_(SS049)]_[Agrobacterium_tumefaciens_str._C58]	Agrobacterium_tumefaciens_str._C58]	virE3	0	0	2	0	0	0	0	0	0	0	0	0	0	0	0	0	0	0	0	0	0	0	0	0	0	0	0	0	0	0	0	0	0	0	0	0	0	0	0	0	0	0	0	0	0	0	0
VFG041053(gi:159186120)_(impM)_serine/threonine_phosphoprotein_phosphatase_[Imp_(SS195)]_[Agrobacterium_tumefaciens_str._C58]	Agrobacterium_tumefaciens_str._C58]	impM	0	0	2	0	0	0	0	0	0	0	0	0	0	0	0	0	0	0	0	0	0	0	0	0	0	0	0	0	0	0	0	0	0	0	0	0	0	0	0	0	0	0	0	0	0	0	0
VFG041361(gi:16119791)_(virB9)_type_IV_secretion_system_protein_VirB9_[VirB/VirD_system_(SS049)]_[Agrobacterium_tumefaciens_str._C58]	Agrobacterium_tumefaciens_str._C58]	virB9	0	0	2	0	0	0	0	0	0	0	0	0	0	0	0	0	0	0	0	0	0	0	0	0	0	0	0	0	0	0	0	0	0	0	0	0	0	0	0	0	0	0	0	0	0	0	0
VFG041358(gi:41223308)_(virB6)_type_IV_secretion_system_protein_VirB6_[VirB/VirD_system_(SS049)]_[Agrobacterium_tumefaciens_str._C58]	Agrobacterium_tumefaciens_str._C58]	virB6	0	0	2	0	0	0	0	0	0	0	0	0	0	0	0	0	0	0	0	0	0	0	0	0	0	0	0	0	0	0	0	0	0	0	0	0	0	0	0	0	0	0	0	0	0	0	0
VFG041065(gi:15890640)_(impA)_hypothetical_protein_[Imp_(SS195)]_[Agrobacterium_tumefaciens_str._C58]	Agrobacterium_tumefaciens_str._C58]	impA	0	0	2	0	0	0	0	0	0	0	0	0	0	0	0	0	0	0	0	0	0	0	0	0	0	0	0	0	0	0	0	0	0	0	0	0	0	0	0	0	0	0	0	0	0	0	0
VFG041067(gi:15890638)_(impP)_hypothetical_protein_[Imp_(SS195)]_[Agrobacterium_tumefaciens_str._C58]	Agrobacterium_tumefaciens_str._C58]	impP	0	0	2	0	0	0	0	0	0	0	0	0	0	0	0	0	0	0	0	0	0	0	0	0	0	0	0	0	0	0	0	0	0	0	0	0	0	0	0	0	0	0	0	0	0	0	0
VFG041367(gi:16119805)_(virE2)_type_IV_secretion_system_single-stranded_DNA_binding_protein_VirE2_[VirB/VirD_system_(SS049)]_[Agrobacterium_tumefaciens_str._C58]	Agrobacterium_tumefaciens_str._C58]	virE2	0	0	2	0	0	0	0	0	0	0	0	0	0	0	0	0	0	0	0	0	0	0	0	0	0	0	0	0	0	0	0	0	0	0	0	0	0	0	0	0	0	0	0	0	0	0	0
VFG041068(gi:159186126)_(impQ)_hypothetical_protein_[Imp_(SS195)]_[Agrobacterium_tumefaciens_str._C58]	Agrobacterium_tumefaciens_str._C58]	impQ	0	0	2	0	0	0	0	0	0	0	0	0	0	0	0	0	0	0	0	0	0	0	0	0	0	0	0	0	0	0	0	0	0	0	0	0	0	0	0	0	0	0	0	0	0	0	0
VFG041063(gi:15890642)_(impC)_hypothetical_protein_[Imp_(SS195)]_[Agrobacterium_tumefaciens_str._C58]	Agrobacterium_tumefaciens_str._C58]	impC	0	0	2	0	0	0	0	0	0	0	0	0	0	0	0	0	0	0	0	0	0	0	0	0	0	0	0	0	0	0	0	0	0	0	0	0	0	0	0	0	0	0	0	0	0	0	0
VFG041061(gi:15890644)_(impE)_hypothetical_protein_[Imp_(SS195)]_[Agrobacterium_tumefaciens_str._C58]	Agrobacterium_tumefaciens_str._C58]	impE	0	0	2	0	0	0	0	0	0	0	0	0	0	0	0	0	0	0	0	0	0	0	0	0	0	0	0	0	0	0	0	0	0	0	0	0	0	0	0	0	0	0	0	0	0	0	0
VFG041364(gi:16119798)_(virD2)_type_IV_secretion_system_T-DNA_border_endonuclease_VirD2_[VirB/VirD_system_(SS049)]_[Agrobacterium_tumefaciens_str._C58]	Agrobacterium_tumefaciens_str._C58]	virD2	0	0	2	0	0	0	0	0	0	0	0	0	0	0	0	0	0	0	0	0	0	0	0	0	0	0	0	0	0	0	0	0	0	0	0	0	0	0	0	0	0	0	0	0	0	0	0
VFG041357(gi:16119787)_(virB5)_type_IV_secretion_system_protein_VirB5_[VirB/VirD_system_(SS049)]_[Agrobacterium_tumefaciens_str._C58]	Agrobacterium_tumefaciens_str._C58]	virB5	0	0	2	0	0	0	0	0	0	0	0	0	0	0	0	0	0	0	0	0	0	0	0	0	0	0	0	0	0	0	0	0	0	0	0	0	0	0	0	0	0	0	0	0	0	0	0
VFG041064(gi:159186124)_(impB)_hypothetical_protein_[Imp_(SS195)]_[Agrobacterium_tumefaciens_str._C58]	Agrobacterium_tumefaciens_str._C58]	impB	0	0	2	0	0	0	0	0	0	0	0	0	0	0	0	0	0	0	0	0	0	0	0	0	0	0	0	0	0	0	0	0	0	0	0	0	0	0	0	0	0	0	0	0	0	0	0
VFG041058(gi:15890647)_(impH)_hypothetical_protein_[Imp_(SS195)]_[Agrobacterium_tumefaciens_str._C58]	Agrobacterium_tumefaciens_str._C58]	impH	0	0	2	0	0	0	0	0	0	0	0	0	0	0	0	0	0	0	0	0	0	0	0	0	0	0	0	0	0	0	0	0	0	0	0	0	0	0	0	0	0	0	0	0	0	0	0
VFG041062(gi:159186123)_(impD)_hypothetical_protein_[Imp_(SS195)]_[Agrobacterium_tumefaciens_str._C58]	Agrobacterium_tumefaciens_str._C58]	impD	0	0	2	0	0	0	0	0	0	0	0	0	0	0	0	0	0	0	0	0	0	0	0	0	0	0	0	0	0	0	0	0	0	0	0	0	0	0	0	0	0	0	0	0	0	0	0
VFG041359(gi:159161998)_(virB7)_type_IV_secretion_system_lipoprotein_VirB7_[VirB/VirD_system_(SS049)]_[Agrobacterium_tumefaciens_str._C58]	Agrobacterium_tumefaciens_str._C58]	virB7	0	0	2	0	0	0	0	0	0	0	0	0	0	0	0	0	0	0	0	0	0	0	0	0	0	0	0	0	0	0	0	0	0	0	0	0	0	0	0	0	0	0	0	0	0	0	0
VFG041059(gi:15890646)_(impG)_hypothetical_protein_[Imp_(SS195)]_[Agrobacterium_tumefaciens_str._C58]	Agrobacterium_tumefaciens_str._C58]	impG	0	0	2	0	0	0	0	0	0	0	0	0	0	0	0	0	0	0	0	0	0	0	0	0	0	0	0	0	0	0	0	0	0	0	0	0	0	0	0	0	0	0	0	0	0	0	0
VFG041360(gi:41223309)_(virB8)_type_IV_secretion_system_protein_VirB8_[VirB/VirD_system_(SS049)]_[Agrobacterium_tumefaciens_str._C58]	Agrobacterium_tumefaciens_str._C58]	virB8	0	0	2	0	0	0	0	0	0	0	0	0	0	0	0	0	0	0	0	0	0	0	0	0	0	0	0	0	0	0	0	0	0	0	0	0	0	0	0	0	0	0	0	0	0	0	0
VFG041060(gi:159186122)_(impF)_hypothetical_protein_[Imp_(SS195)]_[Agrobacterium_tumefaciens_str._C58]	Agrobacterium_tumefaciens_str._C58]	impF	0	0	2	0	0	0	0	0	0	0	0	0	0	0	0	0	0	0	0	0	0	0	0	0	0	0	0	0	0	0	0	0	0	0	0	0	0	0	0	0	0	0	0	0	0	0	0
VFG041069(gi:159186127)_(impR)_hypothetical_protein_[Imp_(SS195)]_[Agrobacterium_tumefaciens_str._C58]	Agrobacterium_tumefaciens_str._C58]	impR	0	0	2	0	0	0	0	0	0	0	0	0	0	0	0	0	0	0	0	0	0	0	0	0	0	0	0	0	0	0	0	0	0	0	0	0	0	0	0	0	0	0	0	0	0	0	0
VFG041354(gi:16119783)_(virB2)_type_IV_secretion_system_pilin_subunit_VirB2_[VirB/VirD_system_(SS049)]_[Agrobacterium_tumefaciens_str._C58]	Agrobacterium_tumefaciens_str._C58]	virB2	0	0	2	0	0	0	0	0	0	0	0	0	0	0	0	0	0	0	0	0	0	0	0	0	0	0	0	0	0	0	0	0	0	0	0	0	0	0	0	0	0	0	0	0	0	0	0
VFG038940(gi:269958665)_(virB6-1)_type_IV_secretion_system_protein_VirB6_[Rvh_T4SS_(CVF797)]_[Anaplasma_centrale_str._Israel]	Anaplasma_centrale_str._Israel]	virB6-1	0	0	2	0	0	0	0	0	0	0	0	0	0	0	0	0	0	0	0	0	0	0	0	0	0	0	0	0	0	0	0	0	0	0	0	0	0	0	0	0	0	0	0	0	0	0	0
VFG039022(gi:269958325)_(virD4)_type_IV_secretion_system_protein_VirD4_[Rvh_T4SS_(CVF797)]_[Anaplasma_centrale_str._Israel]	Anaplasma_centrale_str._Israel]	virD4	0	0	2	0	0	0	0	0	0	0	0	0	0	0	0	0	0	0	0	0	0	0	0	0	0	0	0	0	0	0	0	0	0	0	0	0	0	0	0	0	0	0	0	0	0	0	0
VFG038961(gi:269958668)_(virB6-4)_conjugal_transfer_protein_[Rvh_T4SS_(CVF797)]_[Anaplasma_centrale_str._Israel]	Anaplasma_centrale_str._Israel]	virB6-4	0	0	2	0	0	0	0	0	0	0	0	0	0	0	0	0	0	0	0	0	0	0	0	0	0	0	0	0	0	0	0	0	0	0	0	0	0	0	0	0	0	0	0	0	0	0	0
VFG039036(gi:269958323)_(virB10)_type_IV_secretion_system_protein_VirB10_[Rvh_T4SS_(CVF797)]_[Anaplasma_centrale_str._Israel]	Anaplasma_centrale_str._Israel]	virB10	0	0	2	0	0	0	0	0	0	0	0	0	0	0	0	0	0	0	0	0	0	0	0	0	0	0	0	0	0	0	0	0	0	0	0	0	0	0	0	0	0	0	0	0	0	0	0
VFG038947(gi:269958666)_(virB6-2)_type_IV_secretion_system_protein_[Rvh_T4SS_(CVF797)]_[Anaplasma_centrale_str._Israel]	Anaplasma_centrale_str._Israel]	virB6-2	0	0	2	0	0	0	0	0	0	0	0	0	0	0	0	0	0	0	0	0	0	0	0	0	0	0	0	0	0	0	0	0	0	0	0	0	0	0	0	0	0	0	0	0	0	0	0
VFG039060(gi:269958732)_(ankA)_ankyrin_[T4SS_effectors_(CVF798)]_[Anaplasma_centrale_str._Israel]	Anaplasma_centrale_str._Israel]	ankA	0	0	2	0	0	0	0	0	0	0	0	0	0	0	0	0	0	0	0	0	0	0	0	0	0	0	0	0	0	0	0	0	0	0	0	0	0	0	0	0	0	0	0	0	0	0	0
VFG038969(gi:269958703)_(virB8-2)_type_IV_secretion_system_protein_VirB8_[Rvh_T4SS_(CVF797)]_[Anaplasma_centrale_str._Israel]	Anaplasma_centrale_str._Israel]	virB8-2	0	0	2	0	0	0	0	0	0	0	0	0	0	0	0	0	0	0	0	0	0	0	0	0	0	0	0	0	0	0	0	0	0	0	0	0	0	0	0	0	0	0	0	0	0	0	0
VFG039067(gi:269958937)_(ats-1)_hypothetical_protein_[T4SS_effectors_(CVF798)]_[Anaplasma_centrale_str._Israel]	Anaplasma_centrale_str._Israel]	ats-1	0	0	2	0	0	0	0	0	0	0	0	0	0	0	0	0	0	0	0	0	0	0	0	0	0	0	0	0	0	0	0	0	0	0	0	0	0	0	0	0	0	0	0	0	0	0	0
VFG039081(gi:269958562)_(asp14)_hypothetical_protein_[Asp14_(CVF800)]_[Anaplasma_centrale_str._Israel]	Anaplasma_centrale_str._Israel]	asp14	0	0	2	0	0	0	0	0	0	0	0	0	0	0	0	0	0	0	0	0	0	0	0	0	0	0	0	0	0	0	0	0	0	0	0	0	0	0	0	0	0	0	0	0	0	0	0
VFG039050(gi:269958321)_(virB8-1)_type_IV_secretion_system_protein_VirB8_[Rvh_T4SS_(CVF797)]_[Anaplasma_centrale_str._Israel]	Anaplasma_centrale_str._Israel]	virB8-1	0	0	2	0	0	0	0	0	0	0	0	0	0	0	0	0	0	0	0	0	0	0	0	0	0	0	0	0	0	0	0	0	0	0	0	0	0	0	0	0	0	0	0	0	0	0	0
VFG038954(gi:269958667)_(virB6-3)_plasmid_conjugal_transfer_protein_[Rvh_T4SS_(CVF797)]_[Anaplasma_centrale_str._Israel]	Anaplasma_centrale_str._Israel]	virB6-3	0	0	2	0	0	0	0	0	0	0	0	0	0	0	0	0	0	0	0	0	0	0	0	0	0	0	0	0	0	0	0	0	0	0	0	0	0	0	0	0	0	0	0	0	0	0	0
VFG039043(gi:269958322)_(virB9-1)_type_IV_secretion_system_protein_VirB9_[Rvh_T4SS_(CVF797)]_[Anaplasma_centrale_str._Israel]	Anaplasma_centrale_str._Israel]	virB9-1	0	0	2	0	0	0	0	0	0	0	0	0	0	0	0	0	0	0	0	0	0	0	0	0	0	0	0	0	0	0	0	0	0	0	0	0	0	0	0	0	0	0	0	0	0	0	0
VFG038926(gi:269958663)_(virB3)_type_IV_secretion_system_protein_VirB3_[Rvh_T4SS_(CVF797)]_[Anaplasma_centrale_str._Israel]	Anaplasma_centrale_str._Israel]	virB3	0	0	2	0	0	0	0	0	0	0	0	0	0	0	0	0	0	0	0	0	0	0	0	0	0	0	0	0	0	0	0	0	0	0	0	0	0	0	0	0	0	0	0	0	0	0	0
VFG038976(gi:269958492)_(virB4-2)_type_IV_secretion_system_protein_VirB4_[Rvh_T4SS_(CVF797)]_[Anaplasma_centrale_str._Israel]	Anaplasma_centrale_str._Israel]	virB4-2	0	0	2	0	0	0	0	0	0	0	0	0	0	0	0	0	0	0	0	0	0	0	0	0	0	0	0	0	0	0	0	0	0	0	0	0	0	0	0	0	0	0	0	0	0	0	0
VFG039074(gi:269958634)_(ompA)_hypothetical_protein_[OmpA_(CVF799)]_[Anaplasma_centrale_str._Israel]	Anaplasma_centrale_str._Israel]	ompA	0	0	2	0	0	0	0	0	0	0	0	0	0	0	0	0	0	0	0	0	0	0	0	0	0	0	0	0	0	0	0	0	0	0	0	0	0	0	0	0	0	0	0	0	0	0	0
VFG039029(gi:269958324)_(virB11)_type_IV_secretion_system_protein_VirB11_[Rvh_T4SS_(CVF797)]_[Anaplasma_centrale_str._Israel]	Anaplasma_centrale_str._Israel]	virB11	0	0	2	0	0	0	0	0	0	0	0	0	0	0	0	0	0	0	0	0	0	0	0	0	0	0	0	0	0	0	0	0	0	0	0	0	0	0	0	0	0	0	0	0	0	0	0
VFG038933(gi:269958664)_(virB4-1)_type_IV_secretion_system_protein_VirB4_[Rvh_T4SS_(CVF797)]_[Anaplasma_centrale_str._Israel]	Anaplasma_centrale_str._Israel]	virB4-1	0	0	2	0	0	0	0	0	0	0	0	0	0	0	0	0	0	0	0	0	0	0	0	0	0	0	0	0	0	0	0	0	0	0	0	0	0	0	0	0	0	0	0	0	0	0	0
VFG038990(gi:269958490)_(virB2-7)_type_IV_secretion_system_protein_VirB2_[Rvh_T4SS_(CVF797)]_[Anaplasma_centrale_str._Israel]	Anaplasma_centrale_str._Israel]	virB2-7	0	0	2	0	0	0	0	0	0	0	0	0	0	0	0	0	0	0	0	0	0	0	0	0	0	0	0	0	0	0	0	0	0	0	0	0	0	0	0	0	0	0	0	0	0	0	0
VFG039013(gi:269959167)_(virB2-2)_type_IV_secretion_system_protein_VirB2_[Rvh_T4SS_(CVF797)]_[Anaplasma_centrale_str._Israel]	Anaplasma_centrale_str._Israel]	virB2-2	0	0	2	0	0	0	0	0	0	0	0	0	0	0	0	0	0	0	0	0	0	0	0	0	0	0	0	0	0	0	0	0	0	0	0	0	0	0	0	0	0	0	0	0	0	0	0
VFG039057(gi:269959007)_(virB7)_VirB7_[Rvh_T4SS_(CVF797)]_[Anaplasma_centrale_str._Israel]	Anaplasma_centrale_str._Israel]	virB7	0	0	2	0	0	0	0	0	0	0	0	0	0	0	0	0	0	0	0	0	0	0	0	0	0	0	0	0	0	0	0	0	0	0	0	0	0	0	0	0	0	0	0	0	0	0	0
VFG038919(gi:269959152)_(virB9-2)_conjugal_transfer_protein_TrbG_[Rvh_T4SS_(CVF797)]_[Anaplasma_centrale_str._Israel]	Anaplasma_centrale_str._Israel]	virB9-2	0	0	2	0	0	0	0	0	0	0	0	0	0	0	0	0	0	0	0	0	0	0	0	0	0	0	0	0	0	0	0	0	0	0	0	0	0	0	0	0	0	0	0	0	0	0	0
VFG038983(gi:269958491)_(virB2-8)_type_IV_secretion_system_protein_VirB2_[Rvh_T4SS_(CVF797)]_[Anaplasma_centrale_str._Israel]	Anaplasma_centrale_str._Israel]	virB2-8	0	0	2	0	0	0	0	0	0	0	0	0	0	0	0	0	0	0	0	0	0	0	0	0	0	0	0	0	0	0	0	0	0	0	0	0	0	0	0	0	0	0	0	0	0	0	0
VFG038941(gi:222475288)_(virB6-1)_VirB6_[Rvh_T4SS_(CVF797)]_[Anaplasma_marginale_str._Florida]	Anaplasma_marginale_str._Florida]	virB6-1	0	0	2	0	0	0	0	0	0	0	0	0	0	0	0	0	0	0	0	0	0	0	0	0	0	0	0	0	0	0	0	0	0	0	0	0	0	0	0	0	0	0	0	0	0	0	0
VFG038977(gi:222475466)_(virB4-2)_VirB4_protein_[Rvh_T4SS_(CVF797)]_[Anaplasma_marginale_str._Florida]	Anaplasma_marginale_str._Florida]	virB4-2	0	0	2	0	0	0	0	0	0	0	0	0	0	0	0	0	0	0	0	0	0	0	0	0	0	0	0	0	0	0	0	0	0	0	0	0	0	0	0	0	0	0	0	0	0	0	0
VFG039037(gi:222475651)_(virB10)_VirB10_protein_(virB10)_[Rvh_T4SS_(CVF797)]_[Anaplasma_marginale_str._Florida]	Anaplasma_marginale_str._Florida]	virB10	0	0	2	0	0	0	0	0	0	0	0	0	0	0	0	0	0	0	0	0	0	0	0	0	0	0	0	0	0	0	0	0	0	0	0	0	0	0	0	0	0	0	0	0	0	0	0
VFG039061(gi:222475218)_(ankA)_ankyrin_[T4SS_effectors_(CVF798)]_[Anaplasma_marginale_str._Florida]	Anaplasma_marginale_str._Florida]	ankA	0	0	2	0	0	0	0	0	0	0	0	0	0	0	0	0	0	0	0	0	0	0	0	0	0	0	0	0	0	0	0	0	0	0	0	0	0	0	0	0	0	0	0	0	0	0	0
VFG038927(gi:222475290)_(virB3)_type_IV_secretion_system_protein_VirB3_[Rvh_T4SS_(CVF797)]_[Anaplasma_marginale_str._Florida]	Anaplasma_marginale_str._Florida]	virB3	0	0	2	0	0	0	0	0	0	0	0	0	0	0	0	0	0	0	0	0	0	0	0	0	0	0	0	0	0	0	0	0	0	0	0	0	0	0	0	0	0	0	0	0	0	0	0
VFG038934(gi:222475289)_(virB4-1)_type_IV_secretion_system_ATPase_VirB4_[Rvh_T4SS_(CVF797)]_[Anaplasma_marginale_str._Florida]	Anaplasma_marginale_str._Florida]	virB4-1	0	0	2	0	0	0	0	0	0	0	0	0	0	0	0	0	0	0	0	0	0	0	0	0	0	0	0	0	0	0	0	0	0	0	0	0	0	0	0	0	0	0	0	0	0	0	0
VFG039030(gi:222475650)_(virB11)_type_IV_secretion_system_ATPase_VirB11_[Rvh_T4SS_(CVF797)]_[Anaplasma_marginale_str._Florida]	Anaplasma_marginale_str._Florida]	virB11	0	0	2	0	0	0	0	0	0	0	0	0	0	0	0	0	0	0	0	0	0	0	0	0	0	0	0	0	0	0	0	0	0	0	0	0	0	0	0	0	0	0	0	0	0	0	0
VFG038962(gi:222475285)_(virB6-4)_hypothetical_protein_[Rvh_T4SS_(CVF797)]_[Anaplasma_marginale_str._Florida]	Anaplasma_marginale_str._Florida]	virB6-4	0	0	2	0	0	0	0	0	0	0	0	0	0	0	0	0	0	0	0	0	0	0	0	0	0	0	0	0	0	0	0	0	0	0	0	0	0	0	0	0	0	0	0	0	0	0	0
VFG039068(gi:222475012)_(ats-1)_hypothetical_protein_[T4SS_effectors_(CVF798)]_[Anaplasma_marginale_str._Florida]	Anaplasma_marginale_str._Florida]	ats-1	0	0	2	0	0	0	0	0	0	0	0	0	0	0	0	0	0	0	0	0	0	0	0	0	0	0	0	0	0	0	0	0	0	0	0	0	0	0	0	0	0	0	0	0	0	0	0
VFG039023(gi:222475649)_(virD4)_type_IV_secretion_system_component_VirD4_[Rvh_T4SS_(CVF797)]_[Anaplasma_marginale_str._Florida]	Anaplasma_marginale_str._Florida]	virD4	0	0	2	0	0	0	0	0	0	0	0	0	0	0	0	0	0	0	0	0	0	0	0	0	0	0	0	0	0	0	0	0	0	0	0	0	0	0	0	0	0	0	0	0	0	0	0
VFG038920(gi:222474802)_(virB9-2)_conjugal_transfer_protein_TrbG_[Rvh_T4SS_(CVF797)]_[Anaplasma_marginale_str._Florida]	Anaplasma_marginale_str._Florida]	virB9-2	0	0	2	0	0	0	0	0	0	0	0	0	0	0	0	0	0	0	0	0	0	0	0	0	0	0	0	0	0	0	0	0	0	0	0	0	0	0	0	0	0	0	0	0	0	0	0
VFG038955(gi:222475286)_(virB6-3)_hypothetical_protein_[Rvh_T4SS_(CVF797)]_[Anaplasma_marginale_str._Florida]	Anaplasma_marginale_str._Florida]	virB6-3	0	0	2	0	0	0	0	0	0	0	0	0	0	0	0	0	0	0	0	0	0	0	0	0	0	0	0	0	0	0	0	0	0	0	0	0	0	0	0	0	0	0	0	0	0	0	0
VFG038970(gi:222475247)_(virB8-2)_hypothetical_protein_[Rvh_T4SS_(CVF797)]_[Anaplasma_marginale_str._Florida]	Anaplasma_marginale_str._Florida]	virB8-2	0	0	2	0	0	0	0	0	0	0	0	0	0	0	0	0	0	0	0	0	0	0	0	0	0	0	0	0	0	0	0	0	0	0	0	0	0	0	0	0	0	0	0	0	0	0	0
[truncated: 31,019 more rows]
[truncated: 126 more columns]

## Sheet: Table 1
VFNAME	Strain	name	totalReads	nNotZERO	nZERO	FR.003	FR.024	FR.025	FR.026	FR.027	FR.030	FR.039	FR.040	FR.051	FR.052	FR.053	FR.054	FR.060	FR.110	FR.113	FR.115	FR.116	FR.118	FR.121	FR.125	FR.129	FR.132	FR.139	FR.142	FR.152	FR.156	FR.161	FR.162	FR.166	FR.169	FR.170	FR.173	FR.187	FR.191	FR.192	FR.193	FR.194	FR.195	FR.196	FR.198	FR.001	FR.202	FR.208	FR.211
[truncated: 975 more rows]
[truncated: 127 more columns]
